# Supplementary material
Source: publisher figshare collection journal article supplement (https://acs.figshare.com/ndownloader/files/8025023)
Supplement: Supplementary file 1 [file 8025023]

## Sheet: Description
Supplemental Table 1. Data summary for S-sulfenylated peptides and proteins identified in RKO cells using BTD probe. The spectral information for all the identified peptides, such as precursor mass, mass accuracy, and scan number corresponding to each RAW file, is included.

## Sheet: Analysis View
Name	Software	Value
MS-GF+ Beta (v9517)	MS-GF+ Beta (v9517)
TagRecon 1.4.47	TagRecon 1.4.47

## Sheet: Modification View
Delta Mass	Total	C	M
Total	2228	1662	566
418.1311 ; (0 Unimod matches)	1318	1318
57.0215 ; Carbamidomethyl ; Ala->Gln ; Gly->Asn ; Gly	222	222
57.0214 ; Carbamidomethyl ; Ala->Gln ; Gly->Asn ; Gly	122	122
15.9949 ; Oxidation ; Ala->Ser ; Phe->Tyr	566		566

## Sheet: Spectrum View
Group/Source/Spectrum	Distinct Peptides	Distinct Matches	Filtered Spectra	Distinct Analyses	Distinct Charges	Protein Groups	Scan Time	Precursor m/z	Observed Mass	Exact Mass	Mass Error	Analysis	Charge	Q Value	Sequence
	1318	1741	3208	2	5	849
20150427	1318	1741	3208	2	5	849
JY_BTD_vitro_Sulfenylome_20150416_BR1	1153	1475	1634	2	5	815
0.1.22284							0	1130.18	3387.5	3387.49	0.0116679	MS-GF+ Beta (v9517)	3	7.968e-25	SGDAAIVDM[16]VPGKPM[16]C[418]VESFSDYPPLGR
0.1.20956							0	1003.46	4009.81	4009.79	0.0191295	MS-GF+ Beta (v9517)	4	4.44432e-23	ANFSLPEKC[418]DYM[16]DEVTYGELEKEEAQPIVTK
0.1.24234							0	749.118	2992.44	2992.42	0.0284856	MS-GF+ Beta (v9517)	4	6.27929e-21	AEVSELKC[418]GDLEEELKNVTNNLK
0.1.22184							0	847.885	3387.51	3387.49	0.0176971	MS-GF+ Beta (v9517)	4	1.27126e-20	SGDAAIVDM[16]VPGKPM[16]C[418]VESFSDYPPLGR
0.1.22296							0	847.883	3387.5	3387.49	0.012326	MS-GF+ Beta (v9517)	4	6.41395e-20	SGDAAIVDM[16]VPGKPM[16]C[418]VESFSDYPPLGR
0.1.15494							0	934.422	2800.24	2800.24	0.0079837	MS-GF+ Beta (v9517)	3	2.13881e-19	EAQNLQC[418]AASTAQESC[57]PPKPPR
0.1.17202							0	865.073	2592.2	2592.18	0.0127642	MS-GF+ Beta (v9517)	3	3.71761e-19	ESGSLSPEHGPVVVHC[418]SAGIGR
0.1.19999							0	937.474	2809.4	2809.39	0.0103063	MS-GF+ Beta (v9517)	3	6.19723e-19	IVGPSGAAVPC[418]KVEPGLGADNSVVR
0.1.22738							0	728.624	2910.47	2910.44	0.0289597	MS-GF+ Beta (v9517)	4	7.9604e-19	VSGGLEVLAEKC[418]PNLTHLNLSGNK
0.1.17207							0	649.058	2592.2	2592.18	0.016413	MS-GF+ Beta (v9517)	4	9.02658e-19	ESGSLSPEHGPVVVHC[418]SAGIGR
0.1.19085							0	834.73	2501.17	2501.16	0.012175	MS-GF+ Beta (v9517)	3	9.98165e-19	TC[418]TTVAFTQVNSEDKGALAK
0.1.24179							0	998.483	2992.43	2992.42	0.0125687	MS-GF+ Beta (v9517)	3	1.06795e-18	AEVSELKC[418]GDLEEELKNVTNNLK
0.1.21252							0	877.049	2628.13	2628.11	0.0147762	MS-GF+ Beta (v9517)	3	1.75216e-18	ELLELSC[57]C[57]HSC[418]PFSSTAAAK
0.1.23087							0	888.414	2662.22	2662.21	0.0128225	MS-GF+ Beta (v9517)	3	2.09277e-18	VEDM[16]AELTC[418]LNEASVLHNLK
0.1.22170							0	1130.18	3387.5	3387.49	0.0113017	MS-GF+ Beta (v9517)	3	5.6388e-18	SGDAAIVDM[16]VPGKPM[16]C[418]VESFSDYPPLGR
0.1.16824							0	888.728	2663.16	2663.14	0.0210057	MS-GF+ Beta (v9517)	3	1.0053e-17	QM[16]EKDETVSDC[418]SPHIANIGR
0.1.22201							0	929.431	2785.27	2785.26	0.0144882	MS-GF+ Beta (v9517)	3	1.80783e-17	YADLTEDQLPSC[418]ESLKDTIAR
0.1.20498							0	838.031	2511.07	2511.07	0.00188832	MS-GF+ Beta (v9517)	3	2.18753e-17	QAHLC[418]VLASNC[57]DEPM[16]YVK
0.1.20955							0	836.06	2505.16	2504.14	1.01575	MS-GF+ Beta (v9517)	3	2.41672e-17	KPTDGASSSNC[418]VTDISHLVR
0.1.20954							0	627.049	2504.17	2504.14	0.0240344	MS-GF+ Beta (v9517)	4	4.2109e-17	KPTDGASSSNC[418]VTDISHLVR
0.1.24057							0	955.814	2864.42	2864.4	0.0201842	MS-GF+ Beta (v9517)	3	4.22769e-17	THC[418]PYAVALPEVAPAQPLTEALR
0.1.17017							0	784.663	2350.97	2350.95	0.018893	MS-GF+ Beta (v9517)	3	4.84168e-17	SC[418]SGVEFSTSGHAYTDTGK
0.1.21071							0	627.049	2504.16	2504.14	0.0225696	MS-GF+ Beta (v9517)	4	5.48198e-17	KPTDGASSSNC[418]VTDISHLVR
0.1.25177							0	840.16	3356.61	3356.58	0.0294832	MS-GF+ Beta (v9517)	4	1.26839e-16	ADHQPLTEASYVNLPTIALC[418]NTDSPLR
0.1.27222							0	846.43	3381.69	3381.67	0.0228533	MS-GF+ Beta (v9517)	4	1.64535e-16	DGNASGTTLLEALDC[418]ILPPTRPTDKPLR
0.1.25158							0	976.435	2926.28	2926.27	0.011324	MS-GF+ Beta (v9517)	3	1.71604e-16	LC[418]YVALDFEQEM[16]ATAASSSSLEK
0.1.23639							0	1062.15	3183.42	3183.41	0.00859457	MS-GF+ Beta (v9517)	3	2.19514e-16	EKLC[418]YVALDFEQEM[16]ATAASSSSLEK
0.1.18535							0	776.867	3103.44	3103.41	0.0241811	MS-GF+ Beta (v9517)	4	2.2182e-16	TNHIGHTGYLNTVTVSPDGSLC[418]ASGGK
0.1.23123							0	1043.14	3126.39	3126.39	0.00381855	MS-GF+ Beta (v9517)	3	3.23555e-16	AYHEQLSVAEITNAC[418]FEPANQM[16]VK
0.1.16951							0	878.402	2632.18	2632.16	0.0224192	MS-GF+ Beta (v9517)	3	3.36816e-16	VGVGTC[418]GIADKPM[16]TQYQDTSK
0.1.23648							0	819.741	2456.2	2456.19	0.00737923	MS-GF+ Beta (v9517)	3	3.50051e-16	QTISNAC[418]GTIGLIHAIANNK
0.1.22726							0	787.064	2358.17	2358.15	0.019631	MS-GF+ Beta (v9517)	3	4.23897e-16	GQVC[418]LPVISAENWKPATK
0.1.19771							0	735.03	2202.07	2202.04	0.0218595	MS-GF+ Beta (v9517)	3	4.35849e-16	GPSLQGDLAVSGDIKC[418]PK
0.1.25141							0	1119.87	3356.6	3356.58	0.0178387	MS-GF+ Beta (v9517)	3	4.48373e-16	ADHQPLTEASYVNLPTIALC[418]NTDSPLR
0.1.25696							0	991.161	2970.46	2970.45	0.013767	MS-GF+ Beta (v9517)	3	5.43241e-16	GEETPVIVGSALC[418]ALEGRDPELGLK
0.1.14107							0	595.255	2376.99	2376.97	0.0254379	MS-GF+ Beta (v9517)	4	5.75697e-16	TTM[16]RPQSFYDGSHSC[418]AR
0.1.22575							0	645.82	2579.25	2579.23	0.0200819	MS-GF+ Beta (v9517)	4	6.75687e-16	LVNAC[418]LAEELPHIHAFEQK
0.1.24126							0	749.119	2992.45	2992.42	0.0299504	MS-GF+ Beta (v9517)	4	9.56473e-16	AEVSELKC[418]GDLEEELKNVTNNLK
0.1.23222							0	1043.14	3126.41	3126.39	0.0173684	MS-GF+ Beta (v9517)	3	9.69976e-16	AYHEQLSVAEITNAC[418]FEPANQM[16]VK
0.1.15928							0	952.094	2853.26	2853.25	0.00682814	MS-GF+ Beta (v9517)	3	1.07755e-15	HELQANC[57]YEEVKDRC[418]TLAEK
0.1.22337							0	928.079	2781.21	2781.2	0.0095862	MS-GF+ Beta (v9517)	3	1.08733e-15	DQQEAALVDM[16]VNDGVEDLRC[418]K
0.1.20616							0	652.064	2604.23	2604.22	0.00468594	MS-GF+ Beta (v9517)	4	1.42234e-15	KC[418]LELFSELAEDKENYKK
0.1.25241							0	851.735	2552.18	2552.17	0.0128172	MS-GF+ Beta (v9517)	3	1.43902e-15	VPADTEVVC[418]APPTAYIDFAR
0.1.20974							0	863.718	2588.13	2588.12	0.0156112	MS-GF+ Beta (v9517)	3	1.51287e-15	VLSEC[57]SPLM[16]NDIFNKEC[418]R
0.1.15550							0	681.827	2723.28	2723.26	0.0172963	MS-GF+ Beta (v9517)	4	2.03775e-15	LKPLPGETM[16]EKC[418]TQDLGNSTK
0.1.25330							0	942.807	2825.4	2825.38	0.0236399	MS-GF+ Beta (v9517)	3	2.11217e-15	IIQLLDDYPKC[418]FIVGADNVGSK
0.1.15004							0	695.63	2083.87	2083.85	0.0200046	MS-GF+ Beta (v9517)	3	2.30345e-15	VAAASGHC[418]GAFSGSDSSR
0.1.21066							0	524.659	2618.26	2618.24	0.0186246	MS-GF+ Beta (v9517)	5	2.35558e-15	KC[418]LELFTELAEDKENYKK
0.1.24411							0	1121.51	2241.01	2241	0.0125666	MS-GF+ Beta (v9517)	2	2.41615e-15	AVC[418]M[16]LSNTTAIAEAWAR
0.1.17110							0	813.339	2437	2436.99	0.00712946	MS-GF+ Beta (v9517)	3	2.47716e-15	M[16]TNHC[418]VFSANEDHETIR
0.1.22663							0	623.547	2490.16	2490.14	0.0158837	MS-GF+ Beta (v9517)	4	2.65123e-15	KC[418]LELFTELAEDKENYK
0.1.22057							0	953.132	2856.37	2856.36	0.0139117	MS-GF+ Beta (v9517)	3	3.82705e-15	LVQTPLTDRC[418]YLTM[16]TQALEAR
0.1.14153							0	619.51	2474.01	2473.98	0.0261494	MS-GF+ Beta (v9517)	4	3.83582e-15	YGDGGSTFQSTTGHC[418]VHM[16]R
0.1.20358							0	770.713	2309.12	2309.1	0.0123278	MS-GF+ Beta (v9517)	3	4.5717e-15	VNIEGGAIALGHPLGASGC[418]R
0.1.23474							0	885.186	3536.71	3536.71	0.00697977	MS-GF+ Beta (v9517)	4	4.69967e-15	YASIC[418]QQNGIVPIVEPEILPDGDHDLKR
0.1.25104							0	975.481	2923.42	2923.4	0.0242722	MS-GF+ Beta (v9517)	3	4.77035e-15	TC[418]NVLVALEQQSPDIAQGVHLDR
0.1.21195							0	847.747	2540.22	2540.2	0.0137796	MS-GF+ Beta (v9517)	3	5.2639e-15	AGAIAPC[418]EVTVPAQNTGLGPEK
0.1.18287							0	553.01	2208.01	2208	0.013565	MS-GF+ Beta (v9517)	4	5.65711e-15	NPPELIGVHC[418]THGFNR
0.1.22171							0	877.401	2629.18	2629.17	0.00800225	MS-GF+ Beta (v9517)	3	5.70396e-15	AYEFAERC[418]NEPAVWSQLAK
0.1.20203							0	904.79	2711.35	2711.33	0.0212735	MS-GF+ Beta (v9517)	3	5.78667e-15	LQETLSAADRC[418]GAALAGHQLIR
0.1.23611							0	828.081	2481.22	2481.2	0.0170104	MS-GF+ Beta (v9517)	3	5.79366e-15	LAGANPAVITC[418]DELLLGHEK
0.1.21025							0	751.989	2252.95	2252.93	0.0168428	MS-GF+ Beta (v9517)	3	7.0453e-15	FSVC[418]VLGDQQHC[57]DEAK
0.1.21139							0	1021	2039.98	2039.97	0.00962472	MS-GF+ Beta (v9517)	2	7.60191e-15	TVM[16]PC[418]GTVVTTVTAVK
0.1.21265							0	760.05	2277.13	2277.11	0.0149134	MS-GF+ Beta (v9517)	3	7.94658e-15	VNPLGGAVALGHPLGC[418]TGAR
0.1.25800							0	1110.03	2218.05	2218.04	0.0134694	MS-GF+ Beta (v9517)	2	9.63219e-15	GEETPVIVGSALC[418]ALEGR
0.1.20772							0	794.339	2380	2379.98	0.0148576	MS-GF+ Beta (v9517)	3	9.84194e-15	EM[16]FPYEASTPTGISASC[418]R
0.1.25148							0	851.735	2552.18	2552.17	0.012451	MS-GF+ Beta (v9517)	3	1.03199e-14	VPADTEVVC[418]APPTAYIDFAR
0.1.21053							0	932.417	2794.23	2794.21	0.0186873	MS-GF+ Beta (v9517)	3	1.06436e-14	TQTVC[418]NFTDGALVQHQEWDGK
0.1.24178							0	773.724	2318.15	2318.13	0.023457	MS-GF+ Beta (v9517)	3	1.08733e-14	SLC[57]IPFKPLC[418]ELQPGAK
0.1.13734							0	666.293	2661.14	2661.12	0.0212091	MS-GF+ Beta (v9517)	4	1.13744e-14	KSC[418]VEEPEPEPEAAEGDGDKK
0.1.16563							0	956.773	2867.3	2867.27	0.0264009	MS-GF+ Beta (v9517)	3	1.24486e-14	VGEVC[418]HITC[57]KPEYAYGSAGSPPK
0.1.15914							0	714.32	2853.25	2853.25	-0.00307284	MS-GF+ Beta (v9517)	4	1.30977e-14	HELQANC[57]YEEVKDRC[418]TLAEK
0.1.24414							0	816.063	2445.17	2445.15	0.0221571	MS-GF+ Beta (v9517)	3	1.43643e-14	ELLNPVVEFVSHPSTTC[418]R
0.1.18295							0	737.01	2208.01	2208	0.00832925	MS-GF+ Beta (v9517)	3	1.57803e-14	NPPELIGVHC[418]THGFNR
0.1.20448							0	696.002	2084.98	2084.98	0.00720728	MS-GF+ Beta (v9517)	3	1.80531e-14	TTGLVGLAVC[418]NTPHER
0.1.21988							0	763.045	2286.11	2286.09	0.020486	MS-GF+ Beta (v9517)	3	1.89735e-14	VLGM[16]TLIQKC[418]DFPIM[16]K
0.1.18830							0	672.651	2014.93	2014.92	0.00653352	MS-GF+ Beta (v9517)	3	2.31535e-14	APSVANVGSHC[418]DLSLK
0.1.13071							0	717.652	2149.93	2149.93	0.00240381	MS-GF+ Beta (v9517)	3	2.36726e-14	ATC[418]APQHGAPGPGPADASK
0.1.21695							0	753.701	2258.08	2258.06	0.0177949	MS-GF+ Beta (v9517)	3	2.55692e-14	LNLSC[418]IHSPVVNELM[16]R
0.1.23414							0	786.115	3140.43	3140.4	0.0249594	MS-GF+ Beta (v9517)	4	3.04993e-14	AYHEQLTVAEITNAC[418]FEPANQM[16]VK
0.1.24305							0	814.736	2441.19	2441.17	0.0177318	MS-GF+ Beta (v9517)	3	3.81897e-14	M[16]IPC[418]DFLIPVQTQHPIR
0.1.24649							0	1004.43	2006.85	2006.84	0.0109254	MS-GF+ Beta (v9517)	2	4.03322e-14	TC[418]GFDFTGAVEDISK
0.1.18353							0	765.355	3057.39	3057.38	0.0131147	MS-GF+ Beta (v9517)	4	4.5177e-14	M[16]EEFKDQLPADEC[418]NKLKEEISK
0.1.19176							0	767.382	2299.12	2299.11	0.014564	MS-GF+ Beta (v9517)	3	5.41705e-14	KPVSTTNLQDPGVLGC[418]PR
0.1.20190							0	767.361	2299.06	2299.04	0.020507	MS-GF+ Beta (v9517)	3	6.50878e-14	GFIKDC[418]PSGQLDAAGFQK
0.1.20507							0	1098.02	2194.03	2194.02	0.00486078	MS-GF+ Beta (v9517)	2	6.67462e-14	IISNASC[418]TTNC[57]LAPLAK
0.1.24725							0	957.759	2870.26	2870.24	0.0149502	MS-GF+ Beta (v9517)	3	7.40825e-14	AEGSDVANAVLDGADC[418]IM[16]LSGETAK
0.1.15048							0	709.672	2125.99	2125.97	0.0195988	MS-GF+ Beta (v9517)	3	7.7247e-14	ISC[418]M[16]SKPPAPNPTPPR
0.1.22642							0	590.55	2358.17	2358.15	0.0195567	MS-GF+ Beta (v9517)	4	8.22309e-14	GQVC[418]LPVISAENWKPATK
0.1.22147							0	732.352	2194.04	2194.02	0.0133314	MS-GF+ Beta (v9517)	3	8.39583e-14	IISNASC[57]TTNC[418]LAPLAK
0.1.19262							0	803.38	2407.12	2407.09	0.0250593	MS-GF+ Beta (v9517)	3	8.93986e-14	INQVFHGSC[418]ITEGNELTK
0.1.22160							0	1098.02	2194.03	2194.02	0.0114526	MS-GF+ Beta (v9517)	2	9.31599e-14	IISNASC[57]TTNC[418]LAPLAK
0.1.20412							0	1098.02	2194.02	2194.02	0.00217523	MS-GF+ Beta (v9517)	2	9.58711e-14	IISNASC[418]TTNC[57]LAPLAK
0.1.22257							0	826.388	2476.14	2476.13	0.0116495	MS-GF+ Beta (v9517)	3	1.01134e-13	KC[418]LELFSELAEDKENYK
0.1.19113							0	564.258	2253	2252.99	0.0119326	MS-GF+ Beta (v9517)	4	1.02997e-13	EM[16]LPHVGVSDFC[418]ETKK
0.1.17069							0	610.259	2437.01	2436.99	0.0194453	MS-GF+ Beta (v9517)	4	1.16655e-13	M[16]TNHC[418]VFSANEDHETIR
0.1.13726							0	888.054	2661.14	2661.12	0.0178654	MS-GF+ Beta (v9517)	3	1.2916e-13	KSC[418]VEEPEPEPEAAEGDGDKK
0.1.19031							0	765.706	2294.1	2294.08	0.0152341	MS-GF+ Beta (v9517)	3	1.54507e-13	KGTVEGFEPADNKC[418]LLR
0.1.20488							0	732.35	2194.03	2194.02	0.00747201	MS-GF+ Beta (v9517)	3	1.6951e-13	IISNASC[418]TTNC[57]LAPLAK
0.1.16863							0	819.379	2455.12	2455.1	0.0182095	MS-GF+ Beta (v9517)	3	1.88042e-13	M[16]PC[418]QSLQPEPINTPTHTK
0.1.15507							0	833.355	2497.04	2497.04	0.00631919	MS-GF+ Beta (v9517)	3	2.02454e-13	TKSC[418]SGVEFSTSGSSNTDTGK
0.1.22049							0	1098.02	2194.04	2194.02	0.0129174	MS-GF+ Beta (v9517)	2	2.47967e-13	IISNASC[57]TTNC[418]LAPLAK
0.1.27139							0	846.431	3381.69	3381.67	0.0233416	MS-GF+ Beta (v9517)	4	2.48262e-13	DGNASGTTLLEALDC[418]ILPPTRPTDKPLR
0.1.15852							0	663.637	1987.89	1987.88	0.0118869	MS-GF+ Beta (v9517)	3	2.49153e-13	VLTGVAGEDAEC[418]HAAK
0.1.16324							0	692.583	2766.3	2766.29	0.0118015	MS-GF+ Beta (v9517)	4	2.66646e-13	HGEVC[418]PAGWKPGSDTIKPDVQK
0.1.25425							0	1069.17	3204.48	3204.47	0.0112227	MS-GF+ Beta (v9517)	3	2.84871e-13	NM[16]ITGTAPLDGC[418]ILVVAANDGPM[16]PQTR
0.1.24539							0	890.411	2668.21	2668.19	0.018804	MS-GF+ Beta (v9517)	3	3.09332e-13	DC[418]IGGC[57]SDLVSLQQSGELLTR
0.1.14916							0	717.983	2150.93	2150.91	0.0115523	MS-GF+ Beta (v9517)	3	3.11857e-13	HELQANC[418]YEEVKDR
0.1.23328							0	1077.51	3229.51	3229.5	0.00900712	MS-GF+ Beta (v9517)	3	3.23845e-13	VGM[16]GSGSIC[418]ITQEVLAC[57]GRPQATAVYK
0.1.24389							0	886.109	2655.3	2655.28	0.0215597	MS-GF+ Beta (v9517)	3	3.44441e-13	LGEINVIGEPFLNVNC[418]EHIK
0.1.22518							0	749.369	2245.08	2245.07	0.018673	MS-GF+ Beta (v9517)	3	4.18646e-13	LFTIHQIDAC[418]TNNLPK
0.1.24468							0	969.785	2906.33	2906.31	0.019394	MS-GF+ Beta (v9517)	3	4.42988e-13	DTGTVHLNELGNTQNFM[16]LLC[418]PR
0.1.24431							0	612.298	2445.16	2445.15	0.019031	MS-GF+ Beta (v9517)	4	5.03986e-13	ELLNPVVEFVSHPSTTC[418]R
0.1.18993							0	699.288	2094.84	2094.83	0.0116445	MS-GF+ Beta (v9517)	3	5.19736e-13	C[57]C[57]LTYC[418]FNKPEDK
0.1.16664							0	946.421	2836.24	2836.23	0.0130526	MS-GF+ Beta (v9517)	3	5.52416e-13	KGGSYTQAASSDSAQGSDVSLTAC[418]K
0.1.23411							0	1024.45	2046.89	2046.89	0.00208033	MS-GF+ Beta (v9517)	2	5.59746e-13	NIAFFSTNC[418]VEGTAR
0.1.25631							0	800.721	2399.14	2399.12	0.0232946	MS-GF+ Beta (v9517)	3	6.70623e-13	VC[418]NALALLQC[57]VASHPETR
0.1.21175							0	768.023	2301.05	2301.03	0.0178021	MS-GF+ Beta (v9517)	3	7.29489e-13	QFTPC[418]QLLADHANSPNK
0.1.17517							0	642.297	1923.87	1923.86	0.00968139	MS-GF+ Beta (v9517)	3	7.42865e-13	YSNSALGHVNC[418]TIK
0.1.22795							0	842.746	2525.22	2525.21	0.00740838	MS-GF+ Beta (v9517)	3	7.96738e-13	IIDINYYPVPEAC[418]LSNKR
0.1.24620							0	721.699	2162.08	2162.05	0.0217846	MS-GF+ Beta (v9517)	3	8.2647e-13	LTTLPSDFC[418]GLTHLVK
0.1.22292							0	1066.45	2130.89	2130.88	0.00676906	MS-GF+ Beta (v9517)	2	8.97156e-13	PM[16]C[418]VESFSDYPPLGR
0.1.25714							0	743.624	2970.47	2970.45	0.0197962	MS-GF+ Beta (v9517)	4	9.01513e-13	GEETPVIVGSALC[418]ALEGRDPELGLK
0.1.22183							0	1066.45	2130.88	2130.88	-0.00275243	MS-GF+ Beta (v9517)	2	9.08853e-13	PM[16]C[418]VESFSDYPPLGR
0.1.24366							0	969.786	2906.34	2906.31	0.0208589	MS-GF+ Beta (v9517)	3	9.69286e-13	DTGTVHLNELGNTQNFM[16]LLC[418]PR
0.1.25369							0	1167.51	2333.01	2333.01	0.00204908	MS-GF+ Beta (v9517)	2	1.03615e-12	SLDLFNC[418]EVTNLNDYR
0.1.18459							0	741	2219.98	2219.96	0.0128351	MS-GF+ Beta (v9517)	3	1.17193e-12	QTPNDLTGEHSC[418]IM[16]LK
0.1.23011							0	897.769	2690.29	2690.28	0.0111769	MS-GF+ Beta (v9517)	3	1.18032e-12	LATDLLSLM[16]PSLTSGEVAHC[418]AK
0.1.22614							0	787.065	2358.17	2358.15	0.0223776	MS-GF+ Beta (v9517)	3	1.29709e-12	GQVC[418]LPVISAENWKPATK
0.1.24313							0	773.722	2318.14	2318.13	0.0177807	MS-GF+ Beta (v9517)	3	1.33475e-12	SLC[418]IPFKPLC[57]ELQPGAK
0.1.20217							0	737.346	2209.01	2208.99	0.0230183	MS-GF+ Beta (v9517)	3	1.38814e-12	AEVSELKC[418]GDLEEELK
0.1.22481							0	1033.49	2064.97	2064.95	0.0118955	MS-GF+ Beta (v9517)	2	1.50627e-12	AC[418]QSIYPLHDVFVR
0.1.20684							0	723.009	2166.01	2165.99	0.0189496	MS-GF+ Beta (v9517)	3	1.50906e-12	GTVEGFEPADNKC[418]LLR
0.1.22210							0	819.053	2454.14	2454.12	0.0150952	MS-GF+ Beta (v9517)	3	1.58742e-12	GAVVGIDLGTTNSC[418]VAVM[16]EGK
0.1.21119							0	902.071	2703.19	2703.17	0.0252365	MS-GF+ Beta (v9517)	3	1.64031e-12	YRC[418]ELLYEGPPDDEAAM[16]GIK
0.1.23996							0	1071.86	3212.55	3212.53	0.019254	MS-GF+ Beta (v9517)	3	1.66428e-12	VFIGKDC[418]IGGC[57]SDLVSLQQSGELLTR
0.1.20174							0	1037.43	2072.85	2072.84	0.0100487	MS-GF+ Beta (v9517)	2	1.6757e-12	M[16]EDSVGC[418]LETAEEVK
0.1.21196							0	708.346	2122.02	2122	0.0180562	MS-GF+ Beta (v9517)	3	1.79972e-12	RGPC[418]IIYNEDNGIIK
0.1.15049							0	717.985	2150.93	2150.91	0.0188765	MS-GF+ Beta (v9517)	3	1.90295e-12	HELQANC[418]YEEVKDR
0.1.19710							0	672.659	2014.95	2014.94	0.0196532	MS-GF+ Beta (v9517)	3	2.01343e-12	IGDLAC[418]ANIQHLSSR
0.1.22124							0	763.043	2286.11	2286.09	0.0142604	MS-GF+ Beta (v9517)	3	2.0998e-12	VLGM[16]TLIQKC[418]DFPIM[16]K
0.1.25283							0	1153.84	3458.49	3458.47	0.0188244	MS-GF+ Beta (v9517)	3	2.15028e-12	VDEFPLC[418]GHM[16]VSDEYEQLSSEALEAAR
0.1.25590							0	878.455	3509.79	3509.76	0.0253024	MS-GF+ Beta (v9517)	4	2.29197e-12	KDGNASGTTLLEALDC[418]ILPPTRPTDKPLR
0.1.25587							0	702.965	3509.79	3509.76	0.0231529	MS-GF+ Beta (v9517)	5	2.29291e-12	KDGNASGTTLLEALDC[418]ILPPTRPTDKPLR
0.1.23845							0	692.018	2073.03	2073.02	0.015322	MS-GF+ Beta (v9517)	3	2.36014e-12	RPVFPPLC[418]GDGLLSGK
0.1.23507							0	778.717	2333.13	2333.12	0.012142	MS-GF+ Beta (v9517)	3	2.41037e-12	SVANVIQQAGC[418]PVPEYIK
0.1.16938							0	698.999	2093.98	2093.96	0.0203675	MS-GF+ Beta (v9517)	3	2.48591e-12	NYLEPGKEC[418]VQPATK
0.1.22734							0	946.464	1890.91	1890.9	0.0164902	MS-GF+ Beta (v9517)	2	2.53737e-12	VPTANVSVVDLTC[418]R
0.1.24280							0	720.691	2159.05	2159.04	0.0119872	MS-GF+ Beta (v9517)	3	2.67475e-12	VLISSLQDC[418]LHGIESK
0.1.14927							0	538.74	2150.93	2150.91	0.0173373	MS-GF+ Beta (v9517)	4	2.68611e-12	HELQANC[418]YEEVKDR
0.1.22840							0	946.459	1890.9	1890.9	0.00684664	MS-GF+ Beta (v9517)	2	2.71835e-12	VPTANVSVVDLTC[418]R
0.1.25033							0	1023.51	2045.02	2045.01	0.0079279	MS-GF+ Beta (v9517)	2	2.77114e-12	AAVEEGIVLGGGC[418]ALLR
0.1.19715							0	648.304	1941.89	1941.88	0.0141369	MS-GF+ Beta (v9517)	3	2.77182e-12	KVFANPEDC[418]VAFGK
0.1.21008							0	1098.52	2195.02	2194.02	0.996804	MS-GF+ Beta (v9517)	2	2.83439e-12	IISNASC[418]TTNC[57]LAPLAK
0.1.26759							0	726.007	2175	2175	0.00279883	MS-GF+ Beta (v9517)	3	2.94928e-12	EVC[418]PVLDQFLC[57]HVAK
0.1.22613							0	555.77	2219.05	2219.04	0.00953804	MS-GF+ Beta (v9517)	4	3.21465e-12	GFC[418]FITFKEEEPVKK
0.1.13915							0	616.004	2459.99	2459.97	0.0198268	MS-GF+ Beta (v9517)	4	3.27764e-12	YGDGGSSFQSTTGHC[418]VHM[16]R
0.1.20829							0	956.772	2867.29	2867.28	0.0188187	MS-GF+ Beta (v9517)	3	3.64861e-12	VM[16]TIPYQPM[16]PASSPVIC[418]AGGQDR
0.1.22249							0	620.044	2476.15	2476.13	0.0161529	MS-GF+ Beta (v9517)	4	3.81552e-12	KC[418]LELFSELAEDKENYK
0.1.23392							0	1048.15	3141.43	3140.4	1.02406	MS-GF+ Beta (v9517)	3	3.90585e-12	AYHEQLTVAEITNAC[418]FEPANQM[16]VK
0.1.23131							0	782.607	3126.4	3126.39	0.0122892	MS-GF+ Beta (v9517)	4	4.40084e-12	AYHEQLSVAEITNAC[418]FEPANQM[16]VK
0.1.16521							0	683.645	2047.91	2047.9	0.0160261	MS-GF+ Beta (v9517)	3	4.64064e-12	IVEDEPNKIC[418]EADR
0.1.25130							0	1023.52	2045.02	2045.01	0.0134211	MS-GF+ Beta (v9517)	2	4.97254e-12	AAVEEGIVLGGGC[418]ALLR
0.1.20188							0	847.37	2539.09	2539.07	0.0153465	MS-GF+ Beta (v9517)	3	5.05525e-12	GPQLFHM[16]DPSGTFVQC[418]DAR
0.1.21011							0	732.683	2195.03	2194.02	1.00613	MS-GF+ Beta (v9517)	3	5.20995e-12	IISNASC[418]TTNC[57]LAPLAK
0.1.21580							0	704.698	2111.07	2111.05	0.0185206	MS-GF+ Beta (v9517)	3	5.30671e-12	LVEALC[418]AEHQINLIK
0.1.18924							0	920.74	2759.2	2758.2	1.00097	MS-GF+ Beta (v9517)	3	5.42606e-12	TVYGGGC[418]SEM[16]LM[16]AHAVTQLANR
0.1.22626							0	852.719	2555.13	2555.12	0.0135708	MS-GF+ Beta (v9517)	3	5.59244e-12	INPYM[16]SSPC[418]HIEM[16]ILTEK
0.1.23946							0	692.018	2073.03	2073.02	0.0144065	MS-GF+ Beta (v9517)	3	5.7539e-12	RPVFPPLC[418]GDGLLSGK
0.1.24514							0	816.064	2445.17	2445.15	0.0230726	MS-GF+ Beta (v9517)	3	5.8236e-12	ELLNPVVEFVSHPSTTC[418]R
0.1.21953							0	983.767	2948.28	2948.26	0.0230122	MS-GF+ Beta (v9517)	3	6.12904e-12	VM[16]PFSTAC[418]NTPLSNFESHQNYK
0.1.15211							0	756.844	3023.34	3023.32	0.027755	MS-GF+ Beta (v9517)	4	6.58973e-12	TAPSSSC[418]TAVASAASRPDSTHM[16]VEAR
0.1.16235							0	888.091	2661.25	2661.23	0.0236379	MS-GF+ Beta (v9517)	3	6.75922e-12	TSQC[418]SSPSLSASPGSPTRPQIR
0.1.24940							0	1023.52	2045.02	2045.01	0.0119562	MS-GF+ Beta (v9517)	2	6.87836e-12	AAVEEGIVLGGGC[418]ALLR
0.1.19717							0	971.95	1941.89	1941.88	0.0109764	MS-GF+ Beta (v9517)	2	7.14348e-12	KVFANPEDC[418]VAFGK
0.1.17340							0	1092.52	2183.03	2183.03	0.00882933	MS-GF+ Beta (v9517)	2	7.28772e-12	EIVHLQAGQC[418]GNQIGAK
0.1.25870							0	1166.08	2330.15	2330.14	0.00595032	MS-GF+ Beta (v9517)	2	7.40849e-12	ISLGLPVGAVINC[418]ADNTGAK
0.1.18495							0	764.71	2291.11	2291.09	0.0152577	MS-GF+ Beta (v9517)	3	8.02601e-12	EKGNEILELKC[418]NLENK
0.1.23830							0	688.666	2062.98	2062.97	0.00602839	MS-GF+ Beta (v9517)	3	8.25937e-12	SDSNPLTEILKC[418]PTK
0.1.24213							0	1208.86	3623.57	3623.54	0.0340064	MS-GF+ Beta (v9517)	3	8.64638e-12	C[57]PEALFQPC[418]FLGMESCGIHETTFNSIM[16]K
0.1.15298							0	643.641	1927.9	1927.89	0.00963126	MS-GF+ Beta (v9517)	3	8.76901e-12	KHPSSPEC[418]LVSAQK
0.1.17020							0	646.613	1936.82	1936.8	0.0180533	MS-GF+ Beta (v9517)	3	9.5137e-12	WANYHLENAGC[418]NK
0.1.19078							0	628.627	1882.86	1882.84	0.0136392	MS-GF+ Beta (v9517)	3	9.56748e-12	SGGATIEELTEKC[418]K
0.1.25855							0	778.06	2331.16	2330.14	1.01827	MS-GF+ Beta (v9517)	3	9.80011e-12	ISLGLPVGAVINC[418]ADNTGAK
0.1.17702							0	986.932	1971.85	1971.84	0.0114511	MS-GF+ Beta (v9517)	2	1.19473e-11	SC[418]M[16]LTGTPESVQSAK
0.1.25762							0	740.359	2218.06	2218.04	0.0151651	MS-GF+ Beta (v9517)	3	1.27658e-11	GEETPVIVGSALC[418]ALEGR
0.1.14917							0	709.67	2125.99	2125.97	0.0126408	MS-GF+ Beta (v9517)	3	1.3532e-11	ISC[418]M[16]SKPPAPNPTPPR
0.1.14595							0	719.083	2872.3	2872.28	0.0275542	MS-GF+ Beta (v9517)	4	1.38149e-11	ENSGAAEKPVTIHATPEGTSEAC[418]R
0.1.17384							0	642.297	1923.87	1923.86	0.00876586	MS-GF+ Beta (v9517)	3	1.44275e-11	YSNSALGHVNC[418]TIK
0.1.25127							0	682.681	2045.02	2045.01	0.0132857	MS-GF+ Beta (v9517)	3	1.5894e-11	AAVEEGIVLGGGC[418]ALLR
0.1.22112							0	828.047	2481.12	2481.1	0.0161786	MS-GF+ Beta (v9517)	3	1.63157e-11	AANIPEHNTIGFM[16]FAC[418]VGR
0.1.21717							0	646.325	1935.95	1935.94	0.0133791	MS-GF+ Beta (v9517)	3	1.64604e-11	VPFC[418]LQSC[57]VKPLK
0.1.21452							0	674.014	2019.02	2019.01	0.0145341	MS-GF+ Beta (v9517)	3	1.77387e-11	LIAGC[418]IGKPLGEQFR
0.1.18570							0	707.009	2118	2117.99	0.0173017	MS-GF+ Beta (v9517)	3	1.8257e-11	SQQSKPQDASC[418]LPALK
0.1.25757							0	1062.99	2123.98	2123.97	0.00981614	MS-GF+ Beta (v9517)	2	1.83293e-11	SGC[418]IVNNLAEFTVDPK
0.1.17405							0	962.94	1923.87	1923.86	0.005056	MS-GF+ Beta (v9517)	2	2.00286e-11	YSNSALGHVNC[418]TIK
0.1.21034							0	997.974	1993.93	1993.92	0.0106653	MS-GF+ Beta (v9517)	2	2.00352e-11	VNQIGSVTESLQAC[418]K
0.1.20228							0	761.355	3041.39	3041.37	0.0189019	MS-GF+ Beta (v9517)	4	2.06534e-11	YATTGKC[418]ELENC[57]QPFVVETLHGK
0.1.18859							0	1008.47	2014.92	2014.92	-0.00224226	MS-GF+ Beta (v9517)	2	2.4897e-11	APSVANVGSHC[418]DLSLK
0.1.24231							0	802.731	2405.17	2405.15	0.0191469	MS-GF+ Beta (v9517)	3	2.64026e-11	LALC[418]SADSVAFPVLTHSTR
0.1.22439							0	689.329	2064.97	2064.95	0.0106615	MS-GF+ Beta (v9517)	3	2.69366e-11	AC[418]QSIYPLHDVFVR
0.1.22948							0	658.011	1971.01	1971	0.0120402	MS-GF+ Beta (v9517)	3	2.78079e-11	IAILTC[418]PFEPPKPK
0.1.23052							0	658.012	1971.01	1971	0.0147868	MS-GF+ Beta (v9517)	3	2.91069e-11	IAILTC[418]PFEPPKPK
0.1.24596							0	809.047	2424.12	2424.1	0.0197006	MS-GF+ Beta (v9517)	3	3.00848e-11	LQGINC[418]GPDFTPSFANLGR
0.1.21869							0	905.124	2712.35	2712.32	0.0281609	MS-GF+ Beta (v9517)	3	3.11667e-11	TFVPAM[16]TAIHGPPITAPVVC[418]TR
0.1.20384							0	533.497	2129.96	2129.95	0.00716509	MS-GF+ Beta (v9517)	4	3.18691e-11	KQELEEIC[418]HDLEAR
0.1.24427							0	790.685	2369.03	2369.01	0.0203325	MS-GF+ Beta (v9517)	3	3.20428e-11	M[16]VSDINNAWGC[418]LEQVEK
0.1.24465							0	800.721	2399.14	2399.12	0.0225622	MS-GF+ Beta (v9517)	3	3.28961e-11	VC[57]NALALLQC[418]VASHPETR
0.1.20926							0	997.971	1993.93	1993.92	0.00395146	MS-GF+ Beta (v9517)	2	3.48297e-11	VNQIGSVTESLQAC[418]K
0.1.25028							0	682.68	2045.02	2045.01	0.0105391	MS-GF+ Beta (v9517)	3	3.68063e-11	AAVEEGIVLGGGC[418]ALLR
0.1.20536							0	667.331	1998.97	1998.95	0.0185934	MS-GF+ Beta (v9517)	3	3.83205e-11	VVVFIKPTC[57]PYC[418]R
0.1.24936							0	682.681	2045.02	2045.01	0.0149337	MS-GF+ Beta (v9517)	3	3.97123e-11	AAVEEGIVLGGGC[418]ALLR
0.1.21334							0	646.326	1935.96	1935.94	0.0146608	MS-GF+ Beta (v9517)	3	3.99481e-11	VPFC[57]LQSC[418]VKPLK
0.1.20351							0	710.992	2129.96	2129.95	0.00406558	MS-GF+ Beta (v9517)	3	4.08164e-11	KQELEEIC[418]HDLEAR
0.1.20644							0	896.405	1790.8	1790.79	0.00888087	MS-GF+ Beta (v9517)	2	4.38115e-11	HGFC[418]GIPITDTGR
0.1.14900							0	635.282	1902.82	1902.81	0.0172848	MS-GF+ Beta (v9517)	3	4.41636e-11	SM[16]SVYC[418]TPNKPSR
0.1.20486							0	765.35	2293.03	2293.02	0.00707394	MS-GF+ Beta (v9517)	3	4.46871e-11	IEGDM[16]IVC[418]AAYAHELPK
0.1.14977							0	1076.47	2150.93	2150.91	0.0116266	MS-GF+ Beta (v9517)	2	4.57019e-11	HELQANC[418]YEEVKDR
0.1.16610							0	703.569	2810.25	2810.23	0.0202552	MS-GF+ Beta (v9517)	4	4.64341e-11	IC[418]ANHYITPM[16]M[16]ELKPNAGSDR
0.1.25948							0	777.726	2330.16	2330.14	0.0168623	MS-GF+ Beta (v9517)	3	4.6808e-11	ISLGLPVGAVINC[418]ADNTGAK
0.1.19317							0	625.617	1873.83	1873.82	0.0121481	MS-GF+ Beta (v9517)	3	4.76906e-11	EM[16]NPALGIDC[418]LHK
0.1.21789							0	829.073	2484.2	2484.18	0.0179607	MS-GF+ Beta (v9517)	3	4.84391e-11	ESSEYLKC[418]LTQQAVALQR
0.1.20900							0	732.68	2195.02	2194.02	0.995143	MS-GF+ Beta (v9517)	3	4.9724e-11	IISNASC[418]TTNC[57]LAPLAK
0.1.23144							0	1138.52	2275.03	2275.03	0.00532549	MS-GF+ Beta (v9517)	2	5.14282e-11	GQKC[418]EFQDAYVLLSEK
0.1.22658							0	737	2207.98	2207.96	0.0207782	MS-GF+ Beta (v9517)	3	5.26941e-11	IAVYSC[418]PFDGM[16]ITETK
0.1.24378							0	872.07	2613.19	2612.17	1.01725	MS-GF+ Beta (v9517)	3	5.34948e-11	TDLVPAFQNLM[16]KDC[418]EAEVR
0.1.23627							0	621.81	2483.21	2481.2	2.00766	MS-GF+ Beta (v9517)	4	5.46843e-11	LAGANPAVITC[418]DELLLGHEK
0.1.16267							0	673.965	2018.87	2018.86	0.0170652	MS-GF+ Beta (v9517)	3	5.57558e-11	ISEAC[418]SLAQQSGDHR
0.1.20394							0	732.347	2194.02	2194.02	-0.00314811	MS-GF+ Beta (v9517)	3	5.6553e-11	IISNASC[418]TTNC[57]LAPLAK
0.1.17556							0	728.683	2183.03	2183.03	0.00265149	MS-GF+ Beta (v9517)	3	5.6958e-11	EIVHLQAGQC[418]GNQIGAK
0.1.26109							0	1065.02	2128.04	2129.04	-1.00454	MS-GF+ Beta (v9517)	2	6.17917e-11	AC[418]ANPAAGSVILLENLR
0.1.22570							0	1001.48	2000.94	2000.92	0.0182879	MS-GF+ Beta (v9517)	2	6.19635e-11	VIGIEC[418]SSISDYAVK
0.1.18612							0	750.691	2249.05	2249.03	0.0166786	MS-GF+ Beta (v9517)	3	6.54501e-11	KLEEEQIILEDQNC[418]K
0.1.20317							0	623.621	1867.84	1867.83	0.0152137	MS-GF+ Beta (v9517)	3	6.61185e-11	APPC[418]EYKDWLTK
0.1.17249							0	635.288	2537.12	2537.1	0.0194918	MS-GF+ Beta (v9517)	4	6.81741e-11	KYEDIC[418]PSTHNM[16]DVPNIK
0.1.20807							0	1191	2379.99	2379.98	0.00467797	MS-GF+ Beta (v9517)	2	7.0033e-11	EM[16]FPYEASTPTGISASC[418]R
0.1.24653							0	710.681	2129.02	2129.01	0.0147506	MS-GF+ Beta (v9517)	3	7.80474e-11	HVNTNPLC[418]DLTPIFK
0.1.25321							0	1023.52	2045.02	2045.01	0.0140314	MS-GF+ Beta (v9517)	2	8.09152e-11	AAVEEGIVLGGGC[418]ALLR
0.1.21186							0	803.349	2407.03	2407.02	0.007784	MS-GF+ Beta (v9517)	3	8.58338e-11	SLGTIQQC[57]C[418]DAIDHLC[57]R
0.1.23234							0	782.612	3126.42	3126.39	0.0286466	MS-GF+ Beta (v9517)	4	8.58683e-11	AYHEQLSVAEITNAC[418]FEPANQM[16]VK
0.1.17038							0	627.968	1880.88	1880.86	0.0164633	MS-GF+ Beta (v9517)	3	8.70576e-11	LTTINC[418]EEGDKLK
0.1.22335							0	938.95	1875.88	1875.87	0.0168275	MS-GF+ Beta (v9517)	2	8.8388e-11	VC[418]ENIPIVLC[57]GNK
0.1.25224							0	1023.51	2045.01	2045.01	0.00573063	MS-GF+ Beta (v9517)	2	8.97636e-11	AAVEEGIVLGGGC[418]ALLR
0.1.16517							0	598.959	1793.86	1793.84	0.012356	MS-GF+ Beta (v9517)	3	1.04284e-10	QTEALKC[418]VAQASK
0.1.22226							0	711.306	2130.9	2130.88	0.0122489	MS-GF+ Beta (v9517)	3	1.10061e-10	PM[16]C[418]VESFSDYPPLGR
0.1.17535							0	962.938	1923.86	1923.86	0.00114975	MS-GF+ Beta (v9517)	2	1.13508e-10	YSNSALGHVNC[418]TIK
0.1.15373							0	622.612	1864.82	1864.81	0.00956105	MS-GF+ Beta (v9517)	3	1.18272e-10	HFVGM[16]LPEKDC[418]R
0.1.22685							0	1033.93	2065.85	2064.84	1.00758	MS-GF+ Beta (v9517)	2	1.24397e-10	GTDIM[16]YTGTLDC[418]WR
0.1.16202							0	755.659	2263.95	2263.95	0.00578838	MS-GF+ Beta (v9517)	3	1.27895e-10	M[16]LVQC[418]M[16]QDQEHPSIR
0.1.23425							0	743.339	2227	2226.99	0.00946555	MS-GF+ Beta (v9517)	3	1.29254e-10	AVC[418]M[16]LSNTTAVAEAWAR
0.1.25266							0	682.68	2045.02	2045.01	0.00998981	MS-GF+ Beta (v9517)	3	1.29896e-10	AAVEEGIVLGGGC[418]ALLR
0.1.13441							0	713.323	2136.95	2136.94	0.0127285	MS-GF+ Beta (v9517)	3	1.34746e-10	IHEGC[418]EEPATHNALAK
0.1.24935							0	779.031	2334.07	2334.05	0.0172736	MS-GF+ Beta (v9517)	3	1.45523e-10	SQETEC[418]TYFSTPLLLGK
0.1.21611							0	657.997	1970.97	1970.95	0.0207795	MS-GF+ Beta (v9517)	3	1.49256e-10	VPTHVPVC[418]VLGNYR
0.1.21501							0	597.309	1788.91	1788.89	0.0160608	MS-GF+ Beta (v9517)	3	1.50794e-10	LVVPASQC[418]GSLIGK
0.1.19657							0	603.647	1807.92	1806.92	1.00208	MS-GF+ Beta (v9517)	3	1.54007e-10	FLVTLAQKC[418]PAAK
0.1.16333							0	500.738	1998.92	1998.92	0.00559353	MS-GF+ Beta (v9517)	4	1.5757e-10	VQNNLYHHC[418]VINK
0.1.17308							0	609.604	1825.79	1825.78	0.0127199	MS-GF+ Beta (v9517)	3	1.58176e-10	SYC[418]AEIAHNVSSK
0.1.20784							0	588.602	1762.78	1762.77	0.0118501	MS-GF+ Beta (v9517)	3	1.70983e-10	YNPTWHC[418]IVGR
0.1.22346							0	647.647	1939.92	1939.91	0.0125026	MS-GF+ Beta (v9517)	3	1.75822e-10	LLEC[418]PWLQQQHK
0.1.20058							0	750.375	2248.1	2248.09	0.0135694	MS-GF+ Beta (v9517)	3	1.79565e-10	VRPC[418]VVYGGADIGQQIR
0.1.18274							0	929.92	1857.83	1857.83	0.000367532	MS-GF+ Beta (v9517)	2	1.82948e-10	NALANQSDC[418]VLHR
0.1.16067							0	940.905	1879.79	1879.79	0.00772265	MS-GF+ Beta (v9517)	2	1.84675e-10	HELQANC[418]YEEVK
0.1.15879							0	994.95	1987.89	1987.88	0.0087874	MS-GF+ Beta (v9517)	2	1.85911e-10	VLTGVAGEDAEC[418]HAAK
0.1.18488							0	750.689	2249.04	2249.03	0.00935438	MS-GF+ Beta (v9517)	3	1.92622e-10	KLEEEQIILEDQNC[418]K
0.1.21917							0	902.468	1802.92	1802.91	0.015927	MS-GF+ Beta (v9517)	2	2.02133e-10	LVVPATQC[418]GSLIGK
0.1.16519							0	897.933	1793.85	1793.84	0.00809682	MS-GF+ Beta (v9517)	2	2.042e-10	QTEALKC[418]VAQASK
0.1.19553							0	991.962	1981.91	1981.91	0.00262547	MS-GF+ Beta (v9517)	2	2.07891e-10	YKVC[418]NYGLTFTQK
0.1.17674							0	728.688	2183.04	2183.03	0.0172999	MS-GF+ Beta (v9517)	3	2.13309e-10	EIVHLQAGQC[418]GNQIGAK
0.1.21508							0	706.01	2115.01	2114.99	0.0149587	MS-GF+ Beta (v9517)	3	2.50094e-10	GISSQPFPELHC[418]AALK
0.1.25045							0	949.456	1896.9	1896.89	0.011674	MS-GF+ Beta (v9517)	2	2.50375e-10	TATFENIVC[418]VLNR
0.1.20241							0	1105.51	2209	2208.99	0.009909	MS-GF+ Beta (v9517)	2	2.55589e-10	AEVSELKC[418]GDLEEELK
0.1.13369							0	629.62	1885.84	1885.82	0.0191115	MS-GF+ Beta (v9517)	3	2.75632e-10	ELC[418]HTQSSHASLR
0.1.16111							0	1004.94	2007.86	2007.86	0.00297523	MS-GF+ Beta (v9517)	2	2.76326e-10	FNAHGDANTIVC[418]NSK
0.1.15638							0	638.975	1913.9	1913.89	0.0165504	MS-GF+ Beta (v9517)	3	2.88868e-10	AIPQVKC[418]NEQPNR
0.1.22910							0	614.31	1839.91	1839.9	0.00735908	MS-GF+ Beta (v9517)	3	3.0556e-10	APIIC[418]VLGHVDTGK
0.1.25768							0	1005.98	2009.95	2009.93	0.0206362	MS-GF+ Beta (v9517)	2	3.32564e-10	ADVIQATGDAIC[418]IFR
0.1.19800							0	599.282	1794.82	1794.81	0.0173653	MS-GF+ Beta (v9517)	3	3.41351e-10	VLSLNFSEC[418]HTK
0.1.23007							0	825.166	3296.63	3296.62	0.0177558	MS-GF+ Beta (v9517)	4	3.49993e-10	LRC[418]VLLSNLSSTSHVPEVDPGSAELQK
0.1.17339							0	913.897	1825.78	1825.78	0.00351683	MS-GF+ Beta (v9517)	2	3.73768e-10	SYC[418]AEIAHNVSSK
0.1.25530							0	866.061	2595.16	2595.15	0.0128632	MS-GF+ Beta (v9517)	3	3.82961e-10	LGVENC[418]YFPM[16]FVSQSALEK
0.1.25346							0	776.71	2327.11	2327.1	0.0119674	MS-GF+ Beta (v9517)	3	3.89673e-10	NLDKEYLPIGGLAEFC[418]K
0.1.22703							0	1104.99	2207.97	2207.96	0.0115752	MS-GF+ Beta (v9517)	2	4.01683e-10	IAVYSC[418]PFDGM[16]ITETK
0.1.26380							0	786.894	3143.55	3143.53	0.0208096	MS-GF+ Beta (v9517)	4	4.08304e-10	KDGNASGTTLLEALDC[418]ILPPTRPTDK
0.1.24546							0	946.973	1891.93	1891.92	0.0139114	MS-GF+ Beta (v9517)	2	4.29913e-10	IIC[418]SAGLSLLAEER
0.1.15369							0	581.262	1740.76	1740.76	0.00498932	MS-GF+ Beta (v9517)	3	4.32024e-10	NSAKDC[418]YPAVQK
0.1.19079							0	652.616	1954.83	1954.81	0.0127237	MS-GF+ Beta (v9517)	3	4.36845e-10	NC[418]LTNFHGM[16]DLTR
0.1.23244							0	903.902	1805.79	1805.78	0.0133685	MS-GF+ Beta (v9517)	2	4.59102e-10	LTFSC[418]LGGSDNFK
0.1.19375							0	1016.46	2030.91	2030.91	0.00504867	MS-GF+ Beta (v9517)	2	5.01143e-10	PGHLQEGFGC[418]VVTNR
0.1.25464							0	958.48	1914.95	1914.93	0.011965	MS-GF+ Beta (v9517)	2	5.05619e-10	SLHDALC[418]VLAQTVK
0.1.21219							0	633.628	1897.86	1897.85	0.0142897	MS-GF+ Beta (v9517)	3	5.19306e-10	DKADFC[418]IIHYAGK
0.1.18443							0	667.984	2000.93	1999.91	1.01701	MS-GF+ Beta (v9517)	3	5.50563e-10	SC[418]SLVLEHQPDNIK
0.1.23809							0	822.716	2465.13	2465.12	0.00594406	MS-GF+ Beta (v9517)	3	5.54743e-10	GSQM[16]GTVQPIPC[418]LLSM[16]PTR
0.1.21713							0	588.964	1763.87	1763.86	0.0122339	MS-GF+ Beta (v9517)	3	5.56491e-10	EILSELGKC[418]VAGK
0.1.20482							0	835.363	1668.71	1668.7	0.00953896	MS-GF+ Beta (v9517)	2	5.62806e-10	QAVDSPAASFC[418]R
0.1.19332							0	585.293	1752.86	1752.84	0.0125376	MS-GF+ Beta (v9517)	3	5.77078e-10	VVLDNIHGC[418]PLR
0.1.24197							0	814.737	2441.19	2441.17	0.0210277	MS-GF+ Beta (v9517)	3	6.44728e-10	M[16]IPC[418]DFLIPVQTQHPIR
0.1.24628							0	1127.88	3380.63	3380.61	0.026378	MS-GF+ Beta (v9517)	3	6.83887e-10	YASIC[418]QQNGIVPIVEPEILPDGDHDLK
0.1.21819							0	958.418	1914.82	1914.8	0.0188378	MS-GF+ Beta (v9517)	2	7.02406e-10	QWNNC[418]AFLESSAK
0.1.24145							0	723.705	2168.09	2168.08	0.0175647	MS-GF+ Beta (v9517)	3	7.18034e-10	VAHALAEGLGVIAC[418]IGEK
0.1.18526							0	1125.53	2249.05	2249.03	0.0105884	MS-GF+ Beta (v9517)	2	7.42885e-10	KLEEEQIILEDQNC[418]K
0.1.14333							0	632.626	1894.86	1894.85	0.00764923	MS-GF+ Beta (v9517)	3	7.65914e-10	M[16]RPGVAC[418]SVSQAQK
0.1.18767							0	921.914	1841.81	1841.81	0.00603018	MS-GF+ Beta (v9517)	2	7.85485e-10	SQIC[418]DNAALYAQK
0.1.20088							0	757.366	2269.08	2269.06	0.0138264	MS-GF+ Beta (v9517)	3	7.85837e-10	AGKPVIC[418]ATQM[16]LESM[16]IK
0.1.14658							0	750.684	2249.03	2249.02	0.00880778	MS-GF+ Beta (v9517)	3	7.94687e-10	RGPEVTSQGVQTSSPAC[418]K
0.1.21077							0	978.444	1954.87	1954.87	0.00753775	MS-GF+ Beta (v9517)	2	8.04642e-10	ETVSEESNVLC[418]LSK
0.1.15400							0	603.624	1807.85	1807.84	0.0109383	MS-GF+ Beta (v9517)	3	9.04822e-10	YHNVGLSKC[418]EIK
0.1.23256							0	736.691	2207.05	2207.03	0.0229818	MS-GF+ Beta (v9517)	3	9.27996e-10	SWHLTPSC[418]PLDPAPLR
0.1.17389							0	637.606	1909.8	1909.79	0.00598917	MS-GF+ Beta (v9517)	3	9.37788e-10	ELPGHTGYLSC[418]C[57]R
0.1.27227							0	677.345	3381.69	3381.67	0.0199714	MS-GF+ Beta (v9517)	5	9.58015e-10	DGNASGTTLLEALDC[418]ILPPTRPTDKPLR
0.1.20602							0	731.988	2192.94	2192.93	0.00970731	MS-GF+ Beta (v9517)	3	1.0108e-09	KGTDIM[16]YTGTLDC[418]WR
0.1.20681							0	931.471	1860.93	1860.92	0.00482953	MS-GF+ Beta (v9517)	2	1.01376e-09	KVDLSQPLIATC[418]R
0.1.22038							0	732.351	2194.03	2194.02	0.00948617	MS-GF+ Beta (v9517)	3	1.05946e-09	IISNASC[57]TTNC[418]LAPLAK
0.1.13721							0	673.637	2017.89	2017.87	0.0156072	MS-GF+ Beta (v9517)	3	1.11752e-09	LQAQVEC[418]SHSSQQR
0.1.20303							0	616.609	1846.8	1846.79	0.0161668	MS-GF+ Beta (v9517)	3	1.12273e-09	DSNNLC[418]LHFNPR
0.1.17261							0	879.392	1756.77	1756.75	0.0139942	MS-GF+ Beta (v9517)	2	1.12297e-09	YLAEVAC[418]GDDRK
0.1.22213							0	807.04	2418.1	2418.09	0.00963008	MS-GF+ Beta (v9517)	3	1.13246e-09	QITSYGETC[418]PGLEQYAIK
0.1.19201							0	533.588	1597.74	1597.73	0.0134275	MS-GF+ Beta (v9517)	3	1.15127e-09	VAC[418]IGAWHPAR
0.1.15853							0	609.947	1826.82	1826.81	0.00713349	MS-GF+ Beta (v9517)	3	1.16908e-09	VTKC[418]C[57]TESLVNR
0.1.18754							0	509.999	2035.97	2035.95	0.0172886	MS-GF+ Beta (v9517)	4	1.19102e-09	EVESVDLPHC[418]HLIK
0.1.22100							0	605.604	1813.79	1813.78	0.0107113	MS-GF+ Beta (v9517)	3	1.25574e-09	VFANPEDC[418]VAFGK
0.1.21758							0	790.871	1579.73	1579.72	0.011671	MS-GF+ Beta (v9517)	2	1.26706e-09	GC[418]LLYGPPGTGK
0.1.16719							0	629.293	1884.86	1884.84	0.0163773	MS-GF+ Beta (v9517)	3	1.27127e-09	VC[418]HAHPTLSEAFR
0.1.21352							0	860.913	1719.81	1719.81	0.0039827	MS-GF+ Beta (v9517)	2	1.28937e-09	NTGIIC[418]TIGPASR
0.1.20862							0	598.277	1791.81	1791.8	0.0107944	MS-GF+ Beta (v9517)	3	1.32294e-09	SPVTTLLEC[418]M[16]HK
0.1.25050							0	633.307	1896.9	1896.89	0.0127594	MS-GF+ Beta (v9517)	3	1.34162e-09	TATFENIVC[418]VLNR
0.1.16589							0	629.291	1884.85	1884.84	0.0125321	MS-GF+ Beta (v9517)	3	1.38578e-09	VC[418]HAHPTLSEAFR
0.1.22321							0	730.326	2187.96	2187.95	0.0104354	MS-GF+ Beta (v9517)	3	1.51098e-09	NFILDQC[418]NVYNSGQR
0.1.18266							0	620.286	1857.84	1857.83	0.0117068	MS-GF+ Beta (v9517)	3	1.51626e-09	NALANQSDC[418]VLHR
0.1.21614							0	942.138	2823.39	2823.37	0.0246941	MS-GF+ Beta (v9517)	3	1.60958e-09	GSSGPQPAKPC[418]SGATPTPLLLVGDR
0.1.19237							0	847.907	1693.8	1693.79	0.00779195	MS-GF+ Beta (v9517)	2	1.61495e-09	TLIQNC[418]GASTIR
0.1.21694							0	595.269	1782.78	1782.77	0.0132845	MS-GF+ Beta (v9517)	3	1.61961e-09	NQSFC[418]PTVNLDK
0.1.20177							0	687.002	2057.98	2057.97	0.0146329	MS-GF+ Beta (v9517)	3	1.6513e-09	TLVPHYC[418]ELVGANPK
0.1.18461							0	596.279	1785.81	1785.8	0.0169755	MS-GF+ Beta (v9517)	3	1.65478e-09	FTFIEKC[418]NNPR
0.1.24220							0	592.947	1775.82	1775.8	0.0152915	MS-GF+ Beta (v9517)	3	1.66746e-09	SPVTTLLEC[418]MHK
0.1.17669							0	610.298	1827.87	1827.86	0.014986	MS-GF+ Beta (v9517)	3	1.69047e-09	LLEKC[418]AM[16]TALSSK
0.1.22659							0	728.99	2183.95	2181.94	2.00807	MS-GF+ Beta (v9517)	3	1.70028e-09	AGAFDAVPC[418]YHWSVGGK
0.1.16298							0	881.856	1761.7	1761.69	0.00668562	MS-GF+ Beta (v9517)	2	1.70418e-09	M[16]GITEYNNQC[418]R
0.1.19336							0	877.429	1752.84	1752.84	-0.000144379	MS-GF+ Beta (v9517)	2	1.74038e-09	VVLDNIHGC[418]PLR
0.1.25212							0	931.963	1861.91	1861.9	0.0141084	MS-GF+ Beta (v9517)	2	1.80571e-09	VNQAIWLLC[418]TGAR
0.1.21570							0	694.663	2080.97	2080.95	0.0214593	MS-GF+ Beta (v9517)	3	1.97278e-09	KDC[418]EVVMM[16]IGLPGAGK
0.1.17491							0	859.372	1716.73	1716.73	0.00123255	MS-GF+ Beta (v9517)	2	1.99618e-09	KC[418]PFYAAEQDK
0.1.18706							0	602.64	1804.9	1803.89	1.00828	MS-GF+ Beta (v9517)	3	2.01026e-09	ELEKVC[418]NPIITK
0.1.25637							0	817.079	2448.22	2448.2	0.018091	MS-GF+ Beta (v9517)	3	2.08871e-09	VNPC[418]IGGVILFHETLYQK
0.1.21667							0	892.4	1782.79	1782.77	0.0153119	MS-GF+ Beta (v9517)	2	2.10863e-09	NQSFC[418]PTVNLDK
0.1.21356							0	574.278	1719.81	1719.81	0.00604462	MS-GF+ Beta (v9517)	3	2.13113e-09	NTGIIC[418]TIGPASR
0.1.13977							0	615.26	1842.76	1842.75	0.0108959	MS-GF+ Beta (v9517)	3	2.25054e-09	VM[16]SQNFTNC[418]HTK
0.1.25760							0	670.992	2009.95	2009.93	0.0204398	MS-GF+ Beta (v9517)	3	2.30068e-09	ADVIQATGDAIC[418]IFR
0.1.24930							0	1011	2019.98	2019.96	0.0204003	MS-GF+ Beta (v9517)	2	2.51861e-09	VVNEINIEDLC[418]LTK
0.1.19607							0	699.988	2096.94	2096.94	0.000848891	MS-GF+ Beta (v9517)	3	2.56612e-09	KDC[418]EVVM[16]M[16]IGLPGAGK
0.1.20210							0	757.366	2269.08	2269.06	0.014925	MS-GF+ Beta (v9517)	3	2.68647e-09	AGKPVIC[418]ATQM[16]LESM[16]IK
0.1.19631							0	1049.48	2096.94	2096.94	0.00336462	MS-GF+ Beta (v9517)	2	2.88215e-09	KDC[418]EVVM[16]M[16]IGLPGAGK
0.1.18578							0	830.384	1658.75	1658.75	-0.00050442	MS-GF+ Beta (v9517)	2	2.88444e-09	AAAPAPVSEAVC[418]R
0.1.17076							0	605.523	2418.06	2418.04	0.02507	MS-GF+ Beta (v9517)	4	3.00055e-09	THEAEIVEGENHTYC[418]IR
0.1.23034							0	493.76	1971.01	1971	0.0119659	MS-GF+ Beta (v9517)	4	3.10476e-09	IAILTC[418]PFEPPKPK
0.1.20791							0	658.313	1971.92	1971.9	0.0155183	MS-GF+ Beta (v9517)	3	3.11146e-09	AHEILPNLVC[418]C[57]SAK
0.1.22476							0	542.958	1625.85	1625.84	0.0112768	MS-GF+ Beta (v9517)	3	3.18301e-09	VLC[418]LAVAVGHVK
0.1.13639							0	716.746	3578.7	3578.67	0.0292446	MS-GF+ Beta (v9517)	5	3.20626e-09	SLENETLNKEEDC[418]HSPTSKPPKPDQPLK
0.1.27205							0	1128.24	3381.7	3381.67	0.0320829	MS-GF+ Beta (v9517)	3	3.23855e-09	DGNASGTTLLEALDC[418]ILPPTRPTDKPLR
0.1.20582							0	537.601	1609.78	1609.77	0.00578129	MS-GF+ Beta (v9517)	3	3.24588e-09	IC[418]LIHGPPGTGK
0.1.22723							0	567.625	1699.85	1699.84	0.0116763	MS-GF+ Beta (v9517)	3	3.27816e-09	TLLC[418]LSLTGPHK
0.1.19780							0	660.261	1977.76	1977.74	0.0179995	MS-GF+ Beta (v9517)	3	3.36887e-09	DLNYC[418]FSGM[16]SDHR
0.1.18876							0	932.374	1862.73	1862.73	0.00527472	MS-GF+ Beta (v9517)	2	3.38619e-09	SSVNC[418]PFSSQDM[16]K
0.1.22089							0	605.604	1813.79	1813.78	0.010162	MS-GF+ Beta (v9517)	3	3.48635e-09	VFANPEDC[418]VAFGK
0.1.25490							0	883.919	1765.82	1765.82	0.00754217	MS-GF+ Beta (v9517)	2	3.48641e-09	LPADTC[418]LLEFAR
0.1.25712							0	707.016	2118.03	2118.01	0.013756	MS-GF+ Beta (v9517)	3	3.5108e-09	VC[418]TLAIIDPGDSDIIR
0.1.16614							0	486.235	1940.91	1940.9	0.0114364	MS-GF+ Beta (v9517)	4	3.57183e-09	GAPEGVIDRC[418]THIR
0.1.18481							0	893.909	1785.8	1785.8	0.00734524	MS-GF+ Beta (v9517)	2	3.57236e-09	FTFIEKC[418]NNPR
0.1.17598							0	859.373	1716.73	1716.73	0.00342981	MS-GF+ Beta (v9517)	2	3.57464e-09	KC[418]PFYAAEQDK
0.1.13675							0	895.679	3578.69	3578.67	0.0221778	MS-GF+ Beta (v9517)	4	3.59559e-09	SLENETLNKEEDC[418]HSPTSKPPKPDQPLK
0.1.18143							0	805.361	1608.71	1608.7	0.00551064	MS-GF+ Beta (v9517)	2	3.59915e-09	VIGSGC[418]NLDSAR
0.1.21551							0	972.923	1943.83	1943.82	0.0125553	MS-GF+ Beta (v9517)	2	3.61815e-09	SSFESSC[418]PQQWIK
0.1.19570							0	595.967	1784.88	1784.87	0.00963833	MS-GF+ Beta (v9517)	3	3.73167e-09	RPGAALDPGC[418]VLAK
0.1.17490							0	1092.52	2183.03	2183.03	0.00834104	MS-GF+ Beta (v9517)	2	3.86275e-09	EIVHIQAGQC[418]GNQIGAK
0.1.20748							0	531.008	2120	2119.99	0.0185424	MS-GF+ Beta (v9517)	4	3.86596e-09	KC[418]M[16]LDAALATLNTHGK
0.1.27480							0	939.962	1877.91	1877.89	0.0182118	MS-GF+ Beta (v9517)	2	3.94354e-09	NILEESLC[418]ELVAK
0.1.20823							0	665.273	1992.8	1992.78	0.0174708	MS-GF+ Beta (v9517)	3	3.94561e-09	DLSYC[418]LSGM[16]YDHR
0.1.16334							0	667.319	1998.93	1998.92	0.0148842	MS-GF+ Beta (v9517)	3	4.07042e-09	VQNNLYHHC[418]VINK
0.1.14297							0	594.626	1780.86	1780.85	0.0061455	MS-GF+ Beta (v9517)	3	4.10575e-09	KNC[418]PHVVVGTPGR
0.1.26319							0	810.047	2427.12	2427.11	0.00940659	MS-GF+ Beta (v9517)	3	4.44906e-09	ALSVGNIDDALQC[418]YSEAIK
0.1.19282							0	816.862	1631.71	1631.7	0.0130916	MS-GF+ Beta (v9517)	2	4.52549e-09	TTQFSC[418]TLGEK
0.1.18562							0	845.913	1689.81	1689.8	0.015646	MS-GF+ Beta (v9517)	2	4.53361e-09	KPASQC[418]VLDGVR
0.1.24899							0	954.96	1907.91	1907.89	0.0140031	MS-GF+ Beta (v9517)	2	4.57626e-09	WSSLAC[418]NIALDAVK
0.1.16795							0	920.409	1838.8	1838.79	0.00984356	MS-GF+ Beta (v9517)	2	4.69258e-09	SIKDTIC[418]NQDER
0.1.21526							0	1227.6	2453.19	2453.17	0.0146934	MS-GF+ Beta (v9517)	2	4.72236e-09	VQEKC[418]QLEINFNTLQTK
0.1.17630							0	561.613	1681.82	1681.81	0.0115045	MS-GF+ Beta (v9517)	3	5.11977e-09	LPLVTPHTQC[418]R
0.1.26227							0	895.458	1788.9	1788.89	0.00802306	MS-GF+ Beta (v9517)	2	5.12323e-09	VPFLVLEC[418]PNLK
0.1.22651							0	707.321	2118.94	2118.93	0.0163351	MS-GF+ Beta (v9517)	3	5.15611e-09	IC[418]DQWDALGSLTHSR
0.1.22013							0	878.892	1755.77	1755.76	0.00936527	MS-GF+ Beta (v9517)	2	5.2101e-09	DFTPVC[418]TTELGR
0.1.17614							0	556.603	1666.79	1666.77	0.0173432	MS-GF+ Beta (v9517)	3	5.23802e-09	NC[418]PHIVVGTPGR
0.1.16557							0	490.736	1958.92	1958.9	0.0180865	MS-GF+ Beta (v9517)	4	5.28949e-09	ESVDHLTIPSRC[418]GK
0.1.23097							0	759.354	2275.04	2275.03	0.0106833	MS-GF+ Beta (v9517)	3	5.58904e-09	GQKC[418]EFQDAYVLLSEK
0.1.21904							0	731.369	2191.09	2191.07	0.0211728	MS-GF+ Beta (v9517)	3	5.68257e-09	KSDSNPLTEILKC[418]PTK
0.1.20569							0	743.008	2226	2225.99	0.0120998	MS-GF+ Beta (v9517)	3	5.93068e-09	TVIGC[57]SGFHGDC[418]LTLTK
0.1.20269							0	780.73	2339.17	2339.15	0.0170133	MS-GF+ Beta (v9517)	3	6.06842e-09	HRPQVAIIC[418]GSGLGGLTDK
0.1.23065							0	967.941	1933.87	1933.86	0.00837425	MS-GF+ Beta (v9517)	2	6.14601e-09	LC[418]SLFYTNEEVAK
0.1.22070							0	907.904	1813.79	1813.78	0.0130439	MS-GF+ Beta (v9517)	2	6.2255e-09	VFANPEDC[418]VAFGK
0.1.23569							0	820.734	2459.18	2459.17	0.00815204	MS-GF+ Beta (v9517)	3	6.2352e-09	IYHPNINSNGSIC[418]LDILR
0.1.25456							0	639.324	1914.95	1914.93	0.0163463	MS-GF+ Beta (v9517)	3	6.3596e-09	SLHDALC[418]VLAQTVK
0.1.22120							0	816.731	2447.17	2446.18	0.995161	MS-GF+ Beta (v9517)	3	6.56716e-09	SSFYVNGLTLGGQKC[418]SVIR
0.1.23220							0	897.884	1793.75	1793.74	0.0100868	MS-GF+ Beta (v9517)	2	6.69074e-09	WC[418]EYGLTFTEK
0.1.14445							0	632.628	1894.86	1894.85	0.0135086	MS-GF+ Beta (v9517)	3	6.82488e-09	M[16]RPGVAC[418]SVSQAQK
0.1.14853							0	952.413	1902.81	1902.81	0.00606761	MS-GF+ Beta (v9517)	2	6.8535e-09	SM[16]SVYC[418]TPNKPSR
0.1.19828							0	558.955	1673.84	1673.83	0.0148142	MS-GF+ Beta (v9517)	3	6.88189e-09	ISGPNPLSC[418]LKK
0.1.20931							0	665.653	1993.94	1993.92	0.0121779	MS-GF+ Beta (v9517)	3	6.97083e-09	VNQIGSVTESIQAC[418]K
0.1.22076							0	650.654	1948.94	1948.93	0.012096	MS-GF+ Beta (v9517)	3	7.17392e-09	AFLLDPDRC[418]VVQR
0.1.19045							0	595.263	1782.77	1782.76	0.00670099	MS-GF+ Beta (v9517)	3	7.26039e-09	QNTYC[418]FPHSLR
0.1.25724							0	1031.53	2061.05	2061.03	0.0177684	MS-GF+ Beta (v9517)	2	7.60464e-09	TAAPTVC[418]LLVLSQAEK
0.1.21714							0	883.443	1764.87	1763.86	1.01304	MS-GF+ Beta (v9517)	2	7.8934e-09	EILSELGKC[418]VAGK
0.1.21822							0	834.386	1666.76	1666.75	0.00820707	MS-GF+ Beta (v9517)	2	7.9207e-09	YVDIAIPC[418]NNK
0.1.21470							0	818.735	2453.18	2453.17	0.0119335	MS-GF+ Beta (v9517)	3	7.92311e-09	VQEKC[418]QLEINFNTLQTK
0.1.19704							0	750.837	1499.66	1499.65	0.00542362	MS-GF+ Beta (v9517)	2	8.06261e-09	GC[418]TATLGNFAK
0.1.23327							0	752.037	2253.09	2253.07	0.0218025	MS-GF+ Beta (v9517)	3	8.07944e-09	AGKPVIC[418]ATQMLESM[16]IK
0.1.21511							0	591.329	1770.96	1770.95	0.0124483	MS-GF+ Beta (v9517)	3	8.2754e-09	LVVVLC[418]NLKPQK
0.1.22675							0	780.383	2338.13	2338.11	0.0172787	MS-GF+ Beta (v9517)	3	8.33634e-09	ATGRPEC[418]FLTIQEGLASK
0.1.21802							0	834.885	1667.76	1666.75	1.0076	MS-GF+ Beta (v9517)	2	8.36439e-09	YVDIAIPC[418]NNK
0.1.21742							0	882.941	1763.87	1763.86	0.00840197	MS-GF+ Beta (v9517)	2	8.96203e-09	EILSELGKC[418]VAGK
0.1.24784							0	893.76	2678.26	2678.25	0.0126559	MS-GF+ Beta (v9517)	3	9.05152e-09	GEVPC[418]TVTSASPLEEATLSELK
0.1.20653							0	621.318	1860.93	1860.92	0.00988217	MS-GF+ Beta (v9517)	3	9.13278e-09	KVDLSQPLIATC[418]R
0.1.18753							0	573.948	1718.82	1718.81	0.00886195	MS-GF+ Beta (v9517)	3	9.38003e-09	VAASPEDIKLC[418]R
0.1.13687							0	620.266	1857.78	1857.76	0.017575	MS-GF+ Beta (v9517)	3	9.39668e-09	ENSQM[16]FQGRPC[418]K
0.1.23664							0	864.403	1726.79	1726.78	0.00600125	MS-GF+ Beta (v9517)	2	9.40178e-09	YWLC[418]AATGPSIK
0.1.26135							0	895.459	1788.9	1788.89	0.0100983	MS-GF+ Beta (v9517)	2	9.50105e-09	VPFLVLEC[418]PNLK
0.1.22450							0	647.646	1939.92	1939.91	0.00829114	MS-GF+ Beta (v9517)	3	9.54376e-09	LLEC[418]PWLQQQHK
0.1.18882							0	796.357	1590.7	1590.7	0.00387387	MS-GF+ Beta (v9517)	2	9.556e-09	AHVVPC[418]FDASK
0.1.23806							0	604.623	1810.85	1810.84	0.00944163	MS-GF+ Beta (v9517)	3	9.56717e-09	NC[418]IVLIDSTPYR
0.1.24575							0	572.927	1715.76	1715.74	0.0153862	MS-GF+ Beta (v9517)	3	9.60501e-09	NTPLC[418]DSFVFR
0.1.20803							0	882.396	1762.78	1762.77	0.00673638	MS-GF+ Beta (v9517)	2	9.89632e-09	YNPTWHC[418]IVGR
0.1.20927							0	847.753	2540.24	2540.23	0.0120038	MS-GF+ Beta (v9517)	3	1.03996e-08	AGESVLVHGASGGVGLAAC[418]QIAR
0.1.17208							0	475.969	1899.85	1899.84	0.00723791	MS-GF+ Beta (v9517)	4	1.04114e-08	VC[418]EIHFHEINNK
0.1.18484							0	820.393	1638.77	1638.76	0.00678088	MS-GF+ Beta (v9517)	2	1.05112e-08	KC[418]PFTGNVSIR
0.1.14199							0	704.01	2109.01	2108.99	0.0212425	MS-GF+ Beta (v9517)	3	1.09622e-08	RELHGQNPVVTPC[418]NK
0.1.16643							0	955.889	1909.76	1909.75	0.00808621	MS-GF+ Beta (v9517)	2	1.0982e-08	LFQEC[57]C[418]PHSTDR
0.1.18450							0	547.265	1638.77	1638.76	0.00908693	MS-GF+ Beta (v9517)	3	1.10692e-08	KC[418]PFTGNVSIR
0.1.15833							0	594.774	2375.07	2375.04	0.0233123	MS-GF+ Beta (v9517)	4	1.12453e-08	TGVHHYSGNNIELGTAC[418]GK
0.1.16152							0	616.616	1846.83	1846.82	0.00193702	MS-GF+ Beta (v9517)	3	1.13124e-08	RDPHLAC[418]VAYER
0.1.15899							0	548.594	1642.76	1642.76	-0.000170952	MS-GF+ Beta (v9517)	3	1.13472e-08	YLANKC[418]SIASR
0.1.25301							0	1029.16	3084.45	3084.44	0.0139973	MS-GF+ Beta (v9517)	3	1.13729e-08	LTTPTYGDLNHLVSATM[16]SGVTTC[418]LR
0.1.18451							0	647.29	1938.85	1938.83	0.0145797	MS-GF+ Beta (v9517)	3	1.14937e-08	M[16]LTEAIM[16]HDC[418]VVK
0.1.21012							0	880.91	3519.61	3519.58	0.0276922	MS-GF+ Beta (v9517)	4	1.15014e-08	LAELEEFINGPNNAHIQQVGDRC[418]YDEK
0.1.24375							0	961.472	1920.93	1920.91	0.0141569	MS-GF+ Beta (v9517)	2	1.20783e-08	ENVIM[16]SQILPC[418]IK
0.1.20124							0	936.754	2807.24	2807.23	0.0151873	MS-GF+ Beta (v9517)	3	1.20942e-08	C[57]ESAPGC[418]GVWQRPVIDNPNYK
0.1.20727							0	466.241	1860.93	1860.92	0.0121272	MS-GF+ Beta (v9517)	4	1.24531e-08	KVDLSQPLIATC[418]R
0.1.23719							0	848.42	1694.83	1694.82	0.00912495	MS-GF+ Beta (v9517)	2	1.30466e-08	TLLLC[418]GYPNVGK
0.1.24192							0	577.97	1730.89	1730.87	0.0141578	MS-GF+ Beta (v9517)	3	1.31207e-08	TIIPLISQC[418]TPK
0.1.25576							0	647.304	1938.89	1938.88	0.0115304	MS-GF+ Beta (v9517)	3	1.31992e-08	NPFLSLAAC[418]VM[16]PSR
0.1.25220							0	621.644	1861.91	1861.9	0.012264	MS-GF+ Beta (v9517)	3	1.33665e-08	VNQAIWLLC[418]TGAR
0.1.22834							0	631.309	1890.91	1890.9	0.00823717	MS-GF+ Beta (v9517)	3	1.36767e-08	VPTANVSVVDLTC[418]R
0.1.27396							0	768.394	2302.16	2302.14	0.0160494	MS-GF+ Beta (v9517)	3	1.4104e-08	LNIISNLDC[418]VNEVIGIR
0.1.24592							0	730.657	2188.95	2188.93	0.0151949	MS-GF+ Beta (v9517)	3	1.42347e-08	AVYSTNC[418]PVWEEAFR
0.1.21185							0	859.877	1717.74	1717.73	0.0137211	MS-GF+ Beta (v9517)	2	1.48383e-08	SVC[418]TEAGM[16]FAIR
0.1.24629							0	846.163	3380.62	3380.61	0.0177588	MS-GF+ Beta (v9517)	4	1.53912e-08	YASIC[418]QQNGIVPIVEPEILPDGDHDLK
0.1.19106							0	978.417	1954.82	1954.81	0.0077321	MS-GF+ Beta (v9517)	2	1.54191e-08	NC[418]LTNFHGM[16]DLTR
0.1.14891							0	541.563	1621.67	1621.65	0.0117303	MS-GF+ Beta (v9517)	3	1.54393e-08	YSC[418]QEGDKFK
0.1.22150							0	659.292	1974.85	1974.84	0.0111117	MS-GF+ Beta (v9517)	3	1.57115e-08	IIPGFM[16]C[418]QGGDFTR
0.1.19033							0	788.869	1575.72	1575.72	0.006458	MS-GF+ Beta (v9517)	2	1.63544e-08	ALVDGPC[418]TQVR
0.1.24312							0	697.996	2090.97	2090.95	0.0177223	MS-GF+ Beta (v9517)	3	1.65172e-08	GFC[418]FITFKEEEPVK
0.1.22063							0	867.44	1732.87	1732.85	0.0119017	MS-GF+ Beta (v9517)	2	1.69943e-08	GNPVPILIPC[418]HR
0.1.28154							0	663.015	1986.02	1986.01	0.0172489	MS-GF+ Beta (v9517)	3	1.70172e-08	NAGNC[418]LSPAVIVGLLK
0.1.16747							0	703.571	2810.26	2810.23	0.0266029	MS-GF+ Beta (v9517)	4	1.72129e-08	IC[418]ANHYITPM[16]M[16]ELKPNAGSDR
0.1.18569							0	547.268	1638.78	1638.76	0.0176929	MS-GF+ Beta (v9517)	3	1.73863e-08	KC[418]PFTGNVSIR
0.1.22619							0	825.415	1648.81	1648.81	0.00800688	MS-GF+ Beta (v9517)	2	1.74192e-08	LAAQSC[418]ALSLVR
0.1.21500							0	895.462	1788.91	1788.89	0.0182714	MS-GF+ Beta (v9517)	2	1.80875e-08	LVVPASQC[418]GSLIGK
0.1.26168							0	973.442	1944.87	1944.85	0.0157165	MS-GF+ Beta (v9517)	2	1.95533e-08	SIQFVDWC[418]PTGFK
0.1.24826							0	972.834	2915.48	2915.47	0.0116458	MS-GF+ Beta (v9517)	3	1.97929e-08	LSQERPGVLLNQFPC[418]ENLLTVK
0.1.17232							0	586.596	1756.76	1756.75	0.00983055	MS-GF+ Beta (v9517)	3	1.99381e-08	YLAEVAC[418]GDDRK
0.1.22842							0	658.009	1971	1971	0.00453286	MS-GF+ Beta (v9517)	3	2.03256e-08	IAILTC[418]PFEPPKPK
0.1.19221							0	799.877	1597.74	1597.73	0.012098	MS-GF+ Beta (v9517)	2	2.07012e-08	VAC[418]IGAWHPAR
0.1.14252							0	562.586	1684.74	1684.73	0.0115398	MS-GF+ Beta (v9517)	3	2.08909e-08	STNM[16]KC[418]LTPEK
0.1.19581							0	554.273	1659.8	1659.79	0.0108776	MS-GF+ Beta (v9517)	3	2.10463e-08	TSC[418]ALTIHAIGR
0.1.13440							0	535.245	2136.95	2136.94	0.0163773	MS-GF+ Beta (v9517)	4	2.18069e-08	IHEGC[418]EEPATHNALAK
0.1.22370							0	970.965	1939.92	1939.91	0.00806029	MS-GF+ Beta (v9517)	2	2.28221e-08	LLEC[418]PWLQQQHK
0.1.16743							0	786.692	2357.05	2357.03	0.0195278	MS-GF+ Beta (v9517)	3	2.29464e-08	KM[16]EDSVGC[418]LETAEEVKR
0.1.18803							0	621.919	1862.73	1862.73	0.00636007	MS-GF+ Beta (v9517)	3	2.3221e-08	SSVNC[418]PFSSQDM[16]K
0.1.14498							0	540.247	1617.72	1617.7	0.0162104	MS-GF+ Beta (v9517)	3	2.36429e-08	QTPLTC[418]SGHTR
0.1.26106							0	799.033	2394.08	2394.07	0.00552415	MS-GF+ Beta (v9517)	3	2.48783e-08	GM[16]GM[16]NSPELLLLVENC[418]PK
0.1.16121							0	546.885	1637.63	1637.63	0.00419259	MS-GF+ Beta (v9517)	3	2.49638e-08	YC[418]YYNETHK
0.1.25511							0	611.978	1832.91	1832.9	0.0163466	MS-GF+ Beta (v9517)	3	2.52025e-08	ITVPFLEQC[418]PIR
0.1.18772							0	932.374	1862.73	1862.73	0.005763	MS-GF+ Beta (v9517)	2	2.62158e-08	SSVNC[418]PFSSQDM[16]K
0.1.20747							0	707.677	2120.01	2119.99	0.0224009	MS-GF+ Beta (v9517)	3	2.63597e-08	KC[418]M[16]LDAALATLNTHGK
0.1.11966							0	565.907	1694.7	1694.69	0.0143781	MS-GF+ Beta (v9517)	3	2.64596e-08	IHM[16]GSC[418]AENTAK
0.1.18420							0	855.847	1709.68	1709.67	0.0131361	MS-GF+ Beta (v9517)	2	2.64931e-08	HC[418]LLTC[57]EEC[57]K
0.1.16498							0	781.306	1560.6	1560.59	0.00669594	MS-GF+ Beta (v9517)	2	2.67458e-08	SGQGAFGNM[16]C[418]R
0.1.18433							0	570.9	1709.68	1709.67	0.0114138	MS-GF+ Beta (v9517)	3	2.76897e-08	HC[418]LLTC[57]EEC[57]K
0.1.24212							0	866.451	1730.89	1730.87	0.0130114	MS-GF+ Beta (v9517)	2	2.81111e-08	TIIPLISQC[418]TPK
0.1.17065							0	623.621	1867.84	1867.83	0.0133022	MS-GF+ Beta (v9517)	3	2.89143e-08	LTDC[418]VVM[16]RDPASK
0.1.23026							0	661.318	1980.93	1980.92	0.0141437	MS-GF+ Beta (v9517)	3	2.9084e-08	VGEATETALTC[418]LVEK
0.1.18978							0	531.242	1590.71	1590.7	0.00971996	MS-GF+ Beta (v9517)	3	2.92451e-08	AHVVPC[418]FDASK
0.1.21360							0	848.898	1695.78	1695.77	0.00753687	MS-GF+ Beta (v9517)	2	2.93842e-08	LNISFPATGC[418]QK
0.1.15378							0	627.297	1878.87	1878.85	0.0139774	MS-GF+ Beta (v9517)	3	2.94269e-08	MRPGVAC[418]SVSQAQK
0.1.24552							0	858.883	1715.75	1715.74	0.00807528	MS-GF+ Beta (v9517)	2	2.9457e-08	NTPLC[418]DSFVFR
0.1.23196							0	759.356	2275.05	2275.03	0.0176413	MS-GF+ Beta (v9517)	3	3.12922e-08	GQKC[418]EFQDAYVLLSEK
0.1.22181							0	889.425	1776.83	1776.82	0.00991837	MS-GF+ Beta (v9517)	2	3.16334e-08	QIC[418]VVM[16]LESPPK
0.1.22774							0	552.585	1654.73	1654.73	0.00454288	MS-GF+ Beta (v9517)	3	3.19942e-08	ADFC[418]IIHYAGK
0.1.23037							0	917.954	1833.89	1833.89	0.00645686	MS-GF+ Beta (v9517)	2	3.23787e-08	SGALLAC[418]GIVNSGVR
0.1.19893							0	934.941	1867.87	1867.86	0.0083159	MS-GF+ Beta (v9517)	2	3.35791e-08	VIQC[418]FAETGQVQK
0.1.17136							0	537.249	1608.73	1608.72	0.00769728	MS-GF+ Beta (v9517)	3	3.41629e-08	FAC[418]HSASLTVR
0.1.17229							0	545.93	1634.77	1634.75	0.0134593	MS-GF+ Beta (v9517)	3	3.4803e-08	GLDVNKC[418]EIAR
0.1.26103							0	669.672	2005.99	2005.99	0.00941716	MS-GF+ Beta (v9517)	3	3.49937e-08	KNILEESLC[418]ELVAK
0.1.23420							0	829.93	1657.85	1657.83	0.0134042	MS-GF+ Beta (v9517)	2	3.60788e-08	VVPC[418]LVTPVTGR
0.1.19712							0	875.722	2624.14	2624.13	0.0148148	MS-GF+ Beta (v9517)	3	3.7138e-08	IFC[57]C[418]HGGLSPDLQSM[16]EQIR
0.1.16087							0	819.824	1637.63	1637.63	0.00475519	MS-GF+ Beta (v9517)	2	3.79194e-08	YC[418]YYNETHK
0.1.15817							0	529.584	1585.73	1585.71	0.017148	MS-GF+ Beta (v9517)	3	3.80209e-08	ALTISNPHGC[418]R
0.1.21827							0	803.352	2407.03	2407.02	0.0156575	MS-GF+ Beta (v9517)	3	3.844e-08	SLGTIQQC[57]C[418]DAIDHLC[57]R
0.1.24379							0	748.015	2241.02	2241	0.0213423	MS-GF+ Beta (v9517)	3	3.84472e-08	AVC[418]M[16]LSNTTAIAEAWAR
0.1.16194							0	543.882	1628.63	1628.62	0.00811683	MS-GF+ Beta (v9517)	3	3.91167e-08	SC[418]YDLSC[57]HAR
0.1.15693							0	540.573	1618.7	1618.68	0.0168694	MS-GF+ Beta (v9517)	3	3.92959e-08	TALNHC[418]NLC[57]R
0.1.13985							0	507.588	1519.74	1519.73	0.0144624	MS-GF+ Beta (v9517)	3	3.97511e-08	TVAKC[418]QVTPR
0.1.24747							0	977.972	1953.93	1953.91	0.0175596	MS-GF+ Beta (v9517)	2	4.0912e-08	GVLFGVPGAFTPGC[418]SK
0.1.11284							0	382.442	1525.74	1525.73	0.0124377	MS-GF+ Beta (v9517)	4	4.25967e-08	IVAAHNKC[418]PR
0.1.11305							0	509.588	1525.74	1525.73	0.0130613	MS-GF+ Beta (v9517)	3	4.26625e-08	IVAAHNKC[418]PR
0.1.21952							0	841.055	2520.14	2520.12	0.0197366	MS-GF+ Beta (v9517)	3	4.3761e-08	VM[16]AEANHFIDLSQIPC[418]NGK
0.1.19743							0	1008.48	2014.95	2014.94	0.0121591	MS-GF+ Beta (v9517)	2	4.4084e-08	IGDLAC[418]ANIQHLSSR
0.1.17104							0	508.221	1521.64	1521.64	0.00265831	MS-GF+ Beta (v9517)	3	4.45961e-08	VDTC[418]HTPFGK
0.1.22131							0	841.376	1680.74	1680.73	0.00628457	MS-GF+ Beta (v9517)	2	4.93419e-08	QC[57]LPSLDLSC[418]K
0.1.22149							0	561.254	1680.74	1680.73	0.00926201	MS-GF+ Beta (v9517)	3	4.99731e-08	QC[57]LPSLDLSC[418]K
0.1.22686							0	651.336	2601.31	2601.3	0.0175181	MS-GF+ Beta (v9517)	4	5.12499e-08	EKLC[418]FLDKVEPHATIAEIK
0.1.22227							0	863.905	1725.8	1725.79	0.00954543	MS-GF+ Beta (v9517)	2	5.16317e-08	AVASQLDC[418]NFLK
0.1.19786							0	806.859	1611.7	1611.69	0.0144538	MS-GF+ Beta (v9517)	2	5.17727e-08	GVLM[16]YGPPGC[418]GK
0.1.24920							0	674.336	2019.99	2019.96	0.0206921	MS-GF+ Beta (v9517)	3	5.19211e-08	VVNEINIEDLC[418]LTK
0.1.24248							0	901.443	1800.87	1800.86	0.0134027	MS-GF+ Beta (v9517)	2	5.28988e-08	LLTFNPTYC[418]ALK
0.1.21865							0	970.464	1938.91	1938.9	0.0164902	MS-GF+ Beta (v9517)	2	5.40834e-08	AIANEC[418]QANFISIK
0.1.13511							0	515.883	1544.63	1544.61	0.0131356	MS-GF+ Beta (v9517)	3	5.53537e-08	AESHNDC[418]PVR
0.1.13611							0	403.447	1609.76	1609.75	0.00986299	MS-GF+ Beta (v9517)	4	5.89563e-08	AQGTHVLVHC[418]K
0.1.22444							0	846.912	1691.81	1691.8	0.00744517	MS-GF+ Beta (v9517)	2	5.98794e-08	NQLTSLPSAIC[418]K
0.1.24726							0	898.908	1795.8	1795.78	0.0164506	MS-GF+ Beta (v9517)	2	6.09692e-08	LPC[418]IFIC[57]ENNR
0.1.13997							0	922.389	1842.76	1842.75	0.0151206	MS-GF+ Beta (v9517)	2	6.12164e-08	VM[16]SQNFTNC[418]HTK
0.1.21748							0	817.911	1633.81	1633.8	0.0121921	MS-GF+ Beta (v9517)	2	6.1277e-08	NILVNSNLVC[418]K
0.1.16268							0	561.26	1680.76	1679.75	1.0047	MS-GF+ Beta (v9517)	3	6.25917e-08	KPEVTC[418]TLEDK
0.1.26068							0	875.435	1748.86	1748.85	0.00855882	MS-GF+ Beta (v9517)	2	6.2862e-08	INEAVEC[418]LLSLK
0.1.14869							0	595.544	2378.15	2378.13	0.0226501	MS-GF+ Beta (v9517)	4	6.34547e-08	NVIQEPRPC[418]GGPHTAVGTK
0.1.19645							0	747.363	1492.71	1492.71	0.00560229	MS-GF+ Beta (v9517)	2	6.38605e-08	LPSALTATAC[418]K
0.1.14123							0	515.24	1542.7	1542.68	0.0149109	MS-GF+ Beta (v9517)	3	6.51929e-08	EKPVC[418]GTTYK
0.1.23780							0	906.429	1810.84	1810.84	0.00597591	MS-GF+ Beta (v9517)	2	6.74723e-08	NC[418]IVLIDSTPYR
0.1.14919							0	811.839	1621.66	1621.65	0.00918008	MS-GF+ Beta (v9517)	2	6.75025e-08	YSC[418]QEGDKFK
0.1.19634							0	825.864	1649.71	1649.71	0.00607236	MS-GF+ Beta (v9517)	2	6.80133e-08	NLSGQPNFPC[418]R
0.1.16680							0	648.312	1941.92	1940.9	1.01713	MS-GF+ Beta (v9517)	3	6.90913e-08	GAPEGVIDRC[418]THIR
0.1.22062							0	578.63	1732.87	1732.85	0.0142077	MS-GF+ Beta (v9517)	3	7.00189e-08	GNPVPILIPC[418]HR
0.1.19775							0	581.605	1741.79	1741.78	0.0141903	MS-GF+ Beta (v9517)	3	7.02902e-08	VDVFREDLC[418]TK
0.1.21563							0	671.657	2011.95	2011.93	0.0214025	MS-GF+ Beta (v9517)	3	7.0536e-08	NTPSEPIHC[418]IVWAK
0.1.16543							0	551.931	1652.77	1652.76	0.015171	MS-GF+ Beta (v9517)	3	7.06856e-08	NC[418]PHVVVGTPGR
0.1.17684							0	800.851	1599.69	1599.68	0.00707691	MS-GF+ Beta (v9517)	2	7.40494e-08	IINDNATYC[418]R
0.1.17024							0	603.281	1806.82	1806.8	0.0193739	MS-GF+ Beta (v9517)	3	7.45055e-08	SPNLSKC[418]GEELGR
0.1.24866							0	841.415	1680.81	1680.8	0.0110282	MS-GF+ Beta (v9517)	2	7.68703e-08	M[16]ININILSVC[418]K
0.1.23645							0	614.637	1840.89	1840.88	0.0100322	MS-GF+ Beta (v9517)	3	7.7985e-08	SAPHLPGLM[16]C[418]LLR
0.1.23267							0	938.949	1875.88	1875.87	0.0148743	MS-GF+ Beta (v9517)	2	8.05208e-08	VC[57]ENIPIVLC[418]GNK
0.1.15687							0	613.265	1836.77	1836.76	0.0185335	MS-GF+ Beta (v9517)	3	8.1178e-08	HEQNIDC[418]GGGYVK
0.1.14775							0	796.007	2385	2384.99	0.0107057	MS-GF+ Beta (v9517)	3	8.16472e-08	TYPGVM[16]HSSC[418]PQEM[16]AAVK
0.1.18536							0	607.315	1818.92	1818.91	0.0125733	MS-GF+ Beta (v9517)	3	8.2862e-08	VKC[418]LNNLAASQLK
0.1.20305							0	661.308	1980.9	1980.89	0.0170734	MS-GF+ Beta (v9517)	3	8.36261e-08	KLC[418]LNIC[57]VGESGDR
0.1.24632							0	838.928	1675.84	1675.83	0.00980045	MS-GF+ Beta (v9517)	2	8.58293e-08	SLC[418]SEAVPLLVK
0.1.22680							0	825.395	1648.78	1648.77	0.00520782	MS-GF+ Beta (v9517)	2	8.70852e-08	GLC[418]AIAQAESLR
0.1.22066							0	578.63	1732.87	1732.85	0.0134753	MS-GF+ Beta (v9517)	3	8.7832e-08	GNPVPILIPC[418]HR
0.1.21391							0	693.977	2078.91	2078.9	0.00789306	MS-GF+ Beta (v9517)	3	8.78967e-08	GM[16]PPGGGGEVVFSC[418]PVR
0.1.16612							0	637.598	1909.77	1909.75	0.0182048	MS-GF+ Beta (v9517)	3	8.92057e-08	LFQEC[57]C[418]PHSTDR
0.1.27031							0	919.432	1836.85	1836.85	0.00246087	MS-GF+ Beta (v9517)	2	9.18531e-08	LIC[57]C[418]DILDVLDK
0.1.20550							0	739.355	1476.7	1476.69	0.00967782	MS-GF+ Beta (v9517)	2	9.1961e-08	GC[418]GTVLLSGPR
0.1.14344							0	525.233	1572.68	1572.67	0.00679323	MS-GF+ Beta (v9517)	3	9.36162e-08	LNEC[418]VDHTPK
0.1.19542							0	825.862	1649.71	1649.71	0.00131162	MS-GF+ Beta (v9517)	2	9.65003e-08	NLSGQPNFPC[418]R
0.1.16726							0	584.613	1750.82	1750.8	0.0159809	MS-GF+ Beta (v9517)	3	9.67587e-08	EVLTEDKC[418]LQR
0.1.18382							0	589.956	1766.85	1766.84	0.00524135	MS-GF+ Beta (v9517)	3	9.7377e-08	IM[16]EKC[418]TLPLTGK
0.1.18606							0	521.919	1562.73	1562.72	0.0119476	MS-GF+ Beta (v9517)	3	9.89809e-08	SSVTHLLC[418]ASK
0.1.23748							0	855.412	1708.81	1708.8	0.0111087	MS-GF+ Beta (v9517)	2	1.00196e-07	VM[16]TLC[418]PIETLR
0.1.23782							0	619.618	1855.83	1855.82	0.00971498	MS-GF+ Beta (v9517)	3	1.01469e-07	GLELIASENFC[418]SR
0.1.27405							0	692.033	2073.08	2073.06	0.0128027	MS-GF+ Beta (v9517)	3	1.04571e-07	AITIAGIPQSIIEC[418]VK
0.1.21453							0	582.601	1744.78	1744.77	0.0101384	MS-GF+ Beta (v9517)	3	1.06592e-07	NKPFFDIC[418]TSR
0.1.14144							0	772.355	1542.7	1542.68	0.0104686	MS-GF+ Beta (v9517)	2	1.06904e-07	EKPVC[418]GTTYK
0.1.16850							0	554.915	1661.72	1661.71	0.0157637	MS-GF+ Beta (v9517)	3	1.0706e-07	INPIC[418]NDHYR
0.1.15579							0	427.941	1707.73	1707.73	0.00496367	MS-GF+ Beta (v9517)	4	1.07242e-07	VC[418]VEHHTFYR
0.1.15886							0	569.928	1706.76	1706.76	0.00422915	MS-GF+ Beta (v9517)	3	1.07509e-07	TIC[418]SHVQNM[16]IK
0.1.15226							0	602.619	1804.84	1804.82	0.0126765	MS-GF+ Beta (v9517)	3	1.08215e-07	EIGQKC[418]PQELSR
0.1.22636							0	889.439	1776.86	1776.85	0.0098571	MS-GF+ Beta (v9517)	2	1.08927e-07	VALNVSC[418]ANLLDK
0.1.21599							0	557.607	1669.8	1669.78	0.0152945	MS-GF+ Beta (v9517)	3	1.08989e-07	AVLFC[418]LSEDKK
0.1.24735							0	652.317	1953.93	1953.91	0.0173022	MS-GF+ Beta (v9517)	3	1.09062e-07	GVLFGVPGAFTPGC[418]SK
0.1.17263							0	590.61	1768.81	1768.79	0.0143857	MS-GF+ Beta (v9517)	3	1.09728e-07	TVLQM[16]DELKC[418]R
0.1.21194							0	764.85	1527.69	1527.67	0.0117241	MS-GF+ Beta (v9517)	2	1.09753e-07	FGEVVDC[418]TLK
0.1.21716							0	557.606	1669.8	1669.78	0.012731	MS-GF+ Beta (v9517)	3	1.10406e-07	AVLFC[418]LSEDKK
0.1.21482							0	602.285	1803.83	1803.82	0.015319	MS-GF+ Beta (v9517)	3	1.11257e-07	FLQLLC[418]ENHNR
0.1.18748							0	771.372	1540.73	1540.73	0.00205641	MS-GF+ Beta (v9517)	2	1.12712e-07	GC[418]HLLVATPGR
0.1.18366							0	830.842	1659.67	1659.66	0.0101814	MS-GF+ Beta (v9517)	2	1.12934e-07	GSQFGQSC[418]C[57]LR
0.1.18923							0	575.585	1723.73	1723.73	0.00540977	MS-GF+ Beta (v9517)	3	1.13294e-07	NM[16]SVHLSPC[418]FR
0.1.13637							0	537.595	1609.76	1609.75	0.0135384	MS-GF+ Beta (v9517)	3	1.14126e-07	AQGTHVLVHC[418]K
0.1.19677							0	642.959	1925.85	1925.84	0.0107081	MS-GF+ Beta (v9517)	3	1.15269e-07	FNEC[418]GHVLYADIK
0.1.14448							0	787.293	1572.57	1572.56	0.0100531	MS-GF+ Beta (v9517)	2	1.17978e-07	AC[418]FHC[57]ETC[57]K
0.1.22951							0	572.302	1713.88	1713.87	0.0132353	MS-GF+ Beta (v9517)	3	1.18755e-07	LVILANNC[418]PALR
0.1.22342							0	626.3	1875.88	1875.87	0.00887961	MS-GF+ Beta (v9517)	3	1.22986e-07	VC[418]ENIPIVLC[57]GNK
0.1.22156							0	627.284	1878.83	1878.81	0.0189383	MS-GF+ Beta (v9517)	3	1.23501e-07	SEGKC[418]FSVLGFC[57]K
0.1.22724							0	631.311	1890.91	1890.9	0.0142796	MS-GF+ Beta (v9517)	3	1.24185e-07	VPTANVSVVDLTC[418]R
0.1.23582							0	836.893	1671.77	1671.76	0.0145532	MS-GF+ Beta (v9517)	2	1.2783e-07	TM[16]VQLGIC[418]AFR
0.1.19533							0	661.643	1981.91	1981.91	0.000170782	MS-GF+ Beta (v9517)	3	1.28536e-07	YKVC[418]NYGLTFTQK
0.1.28171							0	994.019	1986.02	1986.01	0.0164687	MS-GF+ Beta (v9517)	2	1.28563e-07	NAGNC[418]LSPAVIVGLLK
0.1.21602							0	775.844	1549.67	1549.66	0.0148009	MS-GF+ Beta (v9517)	2	1.30645e-07	VELC[418]SFSGYK
0.1.20788							0	732.683	2195.03	2194.02	1.00521	MS-GF+ Beta (v9517)	3	1.32527e-07	IISNASC[418]TTNC[57]LAPLAK
0.1.17186							0	749.848	1497.68	1497.67	0.0064167	MS-GF+ Beta (v9517)	2	1.36482e-07	IAVAAQNC[418]YK
0.1.22414							0	791.86	1581.71	1579.69	2.01424	MS-GF+ Beta (v9517)	2	1.37168e-07	IC[418]SWNVDGLR
0.1.13157							0	756.338	1510.66	1510.65	0.00701468	MS-GF+ Beta (v9517)	2	1.38068e-07	KC[418]GIQDTNSK
0.1.20668							0	794.836	1587.66	1587.65	0.00880002	MS-GF+ Beta (v9517)	2	1.38886e-07	EVC[418]GFAPYER
0.1.17791							0	559.93	1676.77	1676.76	0.0135231	MS-GF+ Beta (v9517)	3	1.40251e-07	ALRPGDPGFC[418]AR
0.1.13475							0	1069.48	2136.94	2136.94	0.00749272	MS-GF+ Beta (v9517)	2	1.40935e-07	IHEGC[418]EEPATHNALAK
0.1.20199							0	623.62	1867.84	1867.83	0.0106361	MS-GF+ Beta (v9517)	3	1.41399e-07	APPC[418]EYKDWLTK
0.1.24150							0	807.732	2420.17	2420.15	0.0222278	MS-GF+ Beta (v9517)	3	1.42347e-07	STC[418]SLTPALAAHFSENLIK
0.1.17719							0	534.238	1599.69	1599.68	0.0109088	MS-GF+ Beta (v9517)	3	1.46892e-07	IINDNATYC[418]R
0.1.14926							0	750.81	1499.6	1499.59	0.0122737	MS-GF+ Beta (v9517)	2	1.48748e-07	SC[418]ATFSSSHR
0.1.16228							0	815.322	1628.63	1628.62	0.013074	MS-GF+ Beta (v9517)	2	1.49041e-07	SC[418]YDLSC[57]HAR
0.1.21169							0	878.432	1754.85	1754.84	0.0127758	MS-GF+ Beta (v9517)	2	1.49165e-07	FLLQEEISKC[418]K
0.1.16073							0	627.605	1879.79	1879.79	0.00709902	MS-GF+ Beta (v9517)	3	1.51847e-07	HELQANC[418]YEEVK
0.1.14162							0	594.282	1779.82	1779.81	0.0175803	MS-GF+ Beta (v9517)	3	1.58569e-07	YHQIGSGKC[418]EIK
0.1.16085							0	493.249	1476.73	1476.72	0.00349143	MS-GF+ Beta (v9517)	3	1.61536e-07	VIVKC[418]PTSGR
0.1.20778							0	621.32	1860.94	1860.92	0.0153753	MS-GF+ Beta (v9517)	3	1.61563e-07	KVDLSQPLIATC[418]R
0.1.19073							0	520.588	1558.74	1558.73	0.0105909	MS-GF+ Beta (v9517)	3	1.65502e-07	FC[418]LSKPGVYK
0.1.19077							0	593.267	1776.78	1776.77	0.011878	MS-GF+ Beta (v9517)	3	1.66596e-07	LLEC[418]HFM[16]PPEK
0.1.21663							0	736.825	1471.64	1471.62	0.0137745	MS-GF+ Beta (v9517)	2	1.70099e-07	ETGAASFLC[418]R
0.1.21937							0	715.822	1429.63	1429.62	0.0134805	MS-GF+ Beta (v9517)	2	1.71561e-07	GYGLFAGPC[418]K
0.1.18871							0	531.242	1590.71	1590.7	0.00971996	MS-GF+ Beta (v9517)	3	1.72948e-07	AHVVPC[418]FDASK
0.1.21122							0	585.959	1754.85	1754.84	0.0174012	MS-GF+ Beta (v9517)	3	1.73041e-07	FLLQEEISKC[418]K
0.1.18916							0	585.944	1754.81	1754.8	0.0117944	MS-GF+ Beta (v9517)	3	1.76873e-07	GHNQPC[418]LLVGSGR
0.1.21652							0	812.374	1622.73	1622.72	0.0117167	MS-GF+ Beta (v9517)	2	1.80407e-07	SC[418]LLHQFTEK
0.1.18471							0	846.375	1690.73	1690.72	0.0116307	MS-GF+ Beta (v9517)	2	1.80743e-07	DPHLAC[418]VAYER
0.1.19378							0	845.395	1688.78	1688.77	0.0102932	MS-GF+ Beta (v9517)	2	1.82158e-07	TNPTEPVGVVC[418]R
0.1.22039							0	861.405	1720.8	1720.79	0.0048304	MS-GF+ Beta (v9517)	2	1.89493e-07	AALEALGSC[418]LNNK
0.1.18466							0	570.9	1709.68	1709.67	0.00994901	MS-GF+ Beta (v9517)	3	1.89666e-07	HC[418]LLTC[57]EEC[57]K
0.1.23715							0	739.853	1477.69	1477.68	0.00613364	MS-GF+ Beta (v9517)	2	1.95641e-07	ITGLC[418]PFGPR
0.1.19513							0	536.274	1605.8	1605.79	0.00990393	MS-GF+ Beta (v9517)	3	2.00295e-07	AVLGEVKLC[418]EK
0.1.22660							0	921.439	1840.86	1840.85	0.0148204	MS-GF+ Beta (v9517)	2	2.12876e-07	LLDLVQQSC[418]NYK
0.1.21063							0	913.404	1824.79	1824.79	0.00504411	MS-GF+ Beta (v9517)	2	2.16862e-07	PM[16]C[418]IPPSYADLGK
0.1.25489							0	917.463	1832.91	1832.9	0.0153833	MS-GF+ Beta (v9517)	2	2.2148e-07	ITVPFLEQC[418]PIR
0.1.21584							0	767.349	2299.02	2299.01	0.0170837	MS-GF+ Beta (v9517)	3	2.2823e-07	FSIQTM[16]C[418]PIEGEGNIAR
0.1.16101							0	739.369	1476.72	1476.72	0.00124641	MS-GF+ Beta (v9517)	2	2.30945e-07	VIVKC[418]PTSGR
0.1.21291							0	662.999	1985.98	1985.96	0.0155567	MS-GF+ Beta (v9517)	3	2.31251e-07	LC[418]SAHGVLVPGGFGVR
0.1.23170							0	607.777	2427.08	2427.06	0.017894	MS-GF+ Beta (v9517)	4	2.35696e-07	HLNEIDLFHC[418]IDPNDSK
0.1.19955							0	537.933	1610.78	1610.77	0.00735849	MS-GF+ Beta (v9517)	3	2.55893e-07	LLEC[418]PHLNVR
0.1.17169							0	670.633	2008.88	2008.87	0.00458897	MS-GF+ Beta (v9517)	3	2.56733e-07	KGDSNANSDVC[418]AAALR
0.1.24516							0	838.864	1675.71	1675.7	0.0124008	MS-GF+ Beta (v9517)	2	2.60416e-07	FEELC[418]SDLFR
0.1.25292							0	876.414	1750.81	1750.8	0.0114776	MS-GF+ Beta (v9517)	2	2.60973e-07	ESSC[418]LALNDLLR
0.1.20183							0	616.608	1846.8	1846.79	0.0156175	MS-GF+ Beta (v9517)	3	2.61716e-07	DSNNLC[418]LHFNPR
0.1.19834							0	537.935	1610.78	1610.77	0.0128517	MS-GF+ Beta (v9517)	3	2.71625e-07	LLEC[418]PHLNVR
0.1.14447							0	498.902	1493.69	1493.68	0.00985738	MS-GF+ Beta (v9517)	3	2.71932e-07	AETAANRIC[418]K
0.1.23301							0	734.017	2199.03	2199.01	0.022749	MS-GF+ Beta (v9517)	3	2.81141e-07	LM[16]C[418]PQEIVDYIADKK
0.1.22093							0	687.855	2747.39	2747.37	0.0238153	MS-GF+ Beta (v9517)	4	2.87716e-07	HPLTQELKEC[418]EGIVPVPLAEK
0.1.22006							0	802.867	1603.72	1603.71	0.0147257	MS-GF+ Beta (v9517)	2	2.87791e-07	YSYVC[418]PDLVK
0.1.22155							0	564.59	1690.75	1690.74	0.0105771	MS-GF+ Beta (v9517)	3	2.87823e-07	DVIEEYFKC[418]K
0.1.15678							0	919.391	1836.77	1836.76	0.011833	MS-GF+ Beta (v9517)	2	2.95313e-07	HEQNIDC[418]GGGYVK
0.1.14200							0	786.328	1570.64	1570.63	0.00877644	MS-GF+ Beta (v9517)	2	2.99029e-07	TAGQTGM[16]C[418]GGVR
0.1.15421							0	554.223	1659.65	1659.64	0.00938054	MS-GF+ Beta (v9517)	3	3.08286e-07	SLETC[418]M[16]YDHK
0.1.14325							0	508.573	1522.7	1522.69	0.00632146	MS-GF+ Beta (v9517)	3	3.08337e-07	VEEIAASKC[418]R
0.1.21490							0	538.272	1611.8	1611.78	0.0162572	MS-GF+ Beta (v9517)	3	3.1072e-07	AVIFC[418]LSADKK
0.1.22259							0	813.38	1624.74	1624.74	0.007053	MS-GF+ Beta (v9517)	2	3.17661e-07	NTPSFLIAC[418]NK
0.1.13893							0	591.263	1770.77	1770.75	0.0189525	MS-GF+ Beta (v9517)	3	3.20826e-07	RDLM[16]AC[418]AQTGSGK
0.1.22097							0	555.268	1662.78	1662.77	0.00688138	MS-GF+ Beta (v9517)	3	3.23056e-07	AALQEELQLC[418]K
0.1.17392							0	906.398	1810.78	1810.77	0.0128761	MS-GF+ Beta (v9517)	2	3.46327e-07	AGLNC[418]STENM[16]PIK
0.1.23867							0	777.386	1552.76	1552.75	0.00461425	MS-GF+ Beta (v9517)	2	3.50146e-07	IIAIANYVC[418]R
0.1.21620							0	1011.42	2020.83	2020.81	0.0143822	MS-GF+ Beta (v9517)	2	3.5482e-07	GADIM[16]YTGTVDC[418]WR
0.1.25556							0	639.323	1914.95	1914.93	0.0134166	MS-GF+ Beta (v9517)	3	3.55759e-07	SLHDALC[418]VLAQTVK
0.1.16325							0	432.455	1725.79	1725.79	0.00476349	MS-GF+ Beta (v9517)	4	3.64012e-07	LHSLQPHAC[418]FR
0.1.16972							0	566.93	1697.77	1697.75	0.0134275	MS-GF+ Beta (v9517)	3	3.64181e-07	LC[418]DSYEIRPGK
0.1.17302							0	806.345	1610.67	1610.66	0.0105574	MS-GF+ Beta (v9517)	2	3.65959e-07	NLQDAM[16]QVC[418]R
0.1.17150							0	805.368	1608.72	1608.72	0.00429259	MS-GF+ Beta (v9517)	2	3.77965e-07	FAC[418]HSASLTVR
0.1.16553							0	551.931	1652.77	1652.76	0.0173683	MS-GF+ Beta (v9517)	3	3.79085e-07	NC[418]PHVVVGTPGR
0.1.24412							0	585.286	1752.84	1752.82	0.0135811	MS-GF+ Beta (v9517)	3	3.80202e-07	ALAGC[418]DFLTISPK
0.1.17072							0	510.916	1529.73	1529.71	0.0131142	MS-GF+ Beta (v9517)	3	3.84473e-07	AAQHGVC[418]SVLK
0.1.21583							0	813.839	1625.66	1625.65	0.0135191	MS-GF+ Beta (v9517)	2	3.84928e-07	YM[16]AC[57]C[418]LLYR
0.1.21331							0	813.835	1625.65	1625.65	0.00460798	MS-GF+ Beta (v9517)	2	3.87897e-07	YM[16]AC[418]C[57]LLYR
0.1.23004							0	802.9	1603.79	1603.77	0.0117733	MS-GF+ Beta (v9517)	2	3.90698e-07	LLLNC[418]PLSGEK
0.1.21390							0	727.668	2179.98	2179.97	0.0120222	MS-GF+ Beta (v9517)	3	4.00608e-07	NETLGGTC[57]LNVGC[418]IPSK
0.1.16054							0	911.425	1820.84	1820.84	-0.00103488	MS-GF+ Beta (v9517)	2	4.03641e-07	VKC[418]SGPGLSPGM[16]VR
0.1.19759							0	720.679	2159.01	2158.99	0.0220138	MS-GF+ Beta (v9517)	3	4.04332e-07	IFVGGIPHNC[418]GETELR
0.1.23918							0	540.592	1618.76	1618.74	0.0171132	MS-GF+ Beta (v9517)	3	4.08693e-07	DGLGFC[418]ALIHR
0.1.22885							0	596.645	1786.91	1786.91	0.0031379	MS-GF+ Beta (v9517)	3	4.09264e-07	IC[418]IQAILQDKPK
0.1.21166							0	776.872	1551.73	1551.72	0.00890498	MS-GF+ Beta (v9517)	2	4.15471e-07	ATVFLNPAAC[418]K
0.1.22264							0	659.289	1974.85	1974.84	0.00360436	MS-GF+ Beta (v9517)	3	4.17837e-07	IIPGFM[16]C[418]QGGDFTR
0.1.17594							0	573.253	1716.74	1716.73	0.0108018	MS-GF+ Beta (v9517)	3	4.27455e-07	KC[418]PFYAAEQDK
0.1.17576							0	525.255	1572.74	1571.73	1.00929	MS-GF+ Beta (v9517)	3	4.31261e-07	AC[418]SAIHAVNLR
0.1.17174							0	526.942	1577.8	1577.79	0.00945722	MS-GF+ Beta (v9517)	3	4.33089e-07	LLIEKC[418]NTVK
0.1.17486							0	573.254	1716.74	1716.73	0.0115342	MS-GF+ Beta (v9517)	3	4.56688e-07	KC[418]PFYAAEQDK
0.1.21203							0	510.235	1527.68	1527.67	0.0101544	MS-GF+ Beta (v9517)	3	4.58208e-07	FGEVVDC[418]TIK
0.1.18496							0	573.784	2291.11	2291.09	0.0159769	MS-GF+ Beta (v9517)	4	4.6246e-07	EKGNEILELKC[418]NLENK
0.1.24564							0	811.403	1620.79	1620.78	0.0130675	MS-GF+ Beta (v9517)	2	4.68455e-07	NQALFPAC[418]VLK
0.1.26063							0	583.959	1748.86	1748.85	0.00885071	MS-GF+ Beta (v9517)	3	4.69611e-07	INEAVEC[418]LLSLK
0.1.22535							0	635.299	1902.87	1903.86	-0.984861	MS-GF+ Beta (v9517)	3	4.75376e-07	QYQAGQTVTC[418]FLK
0.1.13074							0	418.683	1670.7	1670.7	0.00173318	MS-GF+ Beta (v9517)	4	4.7633e-07	KC[418]YEM[16]ASHLR
0.1.20273							0	602.953	1805.84	1805.83	0.0103392	MS-GF+ Beta (v9517)	3	4.77629e-07	M[16]C[418]SLAVVNLGTHK
0.1.26223							0	597.309	1788.91	1788.89	0.0122212	MS-GF+ Beta (v9517)	3	4.80346e-07	VPFLVLEC[418]PNLK
0.1.16140							0	502.252	1503.74	1503.73	0.00293785	MS-GF+ Beta (v9517)	3	4.82239e-07	LNKC[418]GVISPR
0.1.24043							0	723.703	2168.09	2168.08	0.0102404	MS-GF+ Beta (v9517)	3	4.89684e-07	VAHALAEGLGVIAC[418]IGEK
0.1.20669							0	658.309	1971.91	1971.9	0.00599683	MS-GF+ Beta (v9517)	3	4.96418e-07	AHEILPNLVC[57]C[418]SAK
0.1.15177							0	614.293	1839.86	1839.84	0.017261	MS-GF+ Beta (v9517)	3	5.0376e-07	AKPPADPAAAASPC[418]R
0.1.24527							0	855.398	1708.78	1707.77	1.00619	MS-GF+ Beta (v9517)	2	5.23974e-07	NTWDC[418]GLQILK
0.1.17219							0	517.913	1550.72	1550.7	0.0167806	MS-GF+ Beta (v9517)	3	5.31116e-07	FIC[418]GTQSIHK
0.1.13241							0	741.332	2220.98	2219.98	0.991115	MS-GF+ Beta (v9517)	3	5.33907e-07	HTNPIVENGQTHPC[418]QK
0.1.19808							0	627.967	1880.88	1880.86	0.01959	MS-GF+ Beta (v9517)	3	5.48939e-07	VAHVEVAPFYTC[418]K
0.1.9172							0	373.918	1491.64	1491.64	0.00235915	MS-GF+ Beta (v9517)	4	5.49607e-07	KC[418]AC[57]ASHVAK
0.1.13990							0	760.877	1519.74	1519.73	0.0109357	MS-GF+ Beta (v9517)	2	5.52033e-07	TVAKC[418]QVTPR
0.1.17345							0	754.849	1507.68	1507.68	0.00374501	MS-GF+ Beta (v9517)	2	5.54268e-07	NC[418]LALADDKK
0.1.16598							0	532.944	1595.81	1595.8	0.0135493	MS-GF+ Beta (v9517)	3	5.57309e-07	KKPC[418]ITYGLR
0.1.22962							0	986.513	1971.01	1971	0.0126028	MS-GF+ Beta (v9517)	2	5.57934e-07	IAILTC[418]PFEPPKPK
0.1.17473							0	770.336	1538.66	1538.65	0.00794967	MS-GF+ Beta (v9517)	2	5.59923e-07	SGSAAQAEGLC[418]K
0.1.19733							0	746.859	1491.7	1491.7	0.00793405	MS-GF+ Beta (v9517)	2	5.60828e-07	QLAALNC[418]SVR
0.1.18571							0	555.934	1664.78	1664.77	0.0153458	MS-GF+ Beta (v9517)	3	5.95764e-07	SVC[418]LIGDKEQR
0.1.21365							0	566.267	1695.78	1695.77	0.00544839	MS-GF+ Beta (v9517)	3	6.0297e-07	LNISFPATGC[418]QK
0.1.25150							0	668.355	2002.04	2002.03	0.0165303	MS-GF+ Beta (v9517)	3	6.44379e-07	EKC[418]LLPLQLALESK
0.1.15489							0	785.347	1568.68	1568.68	0.00434564	MS-GF+ Beta (v9517)	2	6.4792e-07	VQYPQSQAC[418]K
0.1.11059							0	521.932	1562.77	1562.76	0.0156622	MS-GF+ Beta (v9517)	3	6.484e-07	NKVC[418]TEKPVK
0.1.20033							0	523.596	1567.77	1567.75	0.0149451	MS-GF+ Beta (v9517)	3	6.55182e-07	KLC[418]PQSLFSK
0.1.23438							0	553.622	1657.84	1657.83	0.0121702	MS-GF+ Beta (v9517)	3	6.61308e-07	VVPC[418]LVTPVTGR
0.1.18806							0	852.868	1703.72	1703.72	0.00355894	MS-GF+ Beta (v9517)	2	6.76251e-07	SSTETC[418]YSAIPK
0.1.18421							0	564.585	1690.73	1690.72	0.00984737	MS-GF+ Beta (v9517)	3	6.84059e-07	DPHLAC[418]VAYER
0.1.24203							0	580.54	2318.13	2318.13	0.00464491	MS-GF+ Beta (v9517)	4	6.86794e-07	SLC[57]IPFKPLC[418]ELQPGAK
0.1.24053							0	692.018	2073.03	2073.02	0.0156882	MS-GF+ Beta (v9517)	3	6.94699e-07	RPVFPPLC[418]GDGLLSGK
0.1.17479							0	771.874	1541.73	1541.72	0.0102254	MS-GF+ Beta (v9517)	2	6.96851e-07	AVAILC[418]NHQR
0.1.21165							0	796.411	1590.81	1590.8	0.0068944	MS-GF+ Beta (v9517)	2	7.15024e-07	QKC[418]LAALASLR
0.1.21779							0	545.612	1633.81	1633.8	0.0176109	MS-GF+ Beta (v9517)	3	7.28826e-07	NILVNSNLVC[418]K
0.1.13282							0	661.262	1320.51	1320.5	0.0110772	MS-GF+ Beta (v9517)	2	7.31764e-07	GPAGNNDC[418]R
0.1.15347							0	542.599	1624.78	1624.77	0.00172111	MS-GF+ Beta (v9517)	3	7.37606e-07	YIC[418]QKPSIQK
0.1.25074							0	585.623	1753.85	1753.83	0.0143675	MS-GF+ Beta (v9517)	3	7.45975e-07	VTAVIPC[418]FPYAR
0.1.16092							0	670.294	2007.86	2007.86	0.0025347	MS-GF+ Beta (v9517)	3	7.49161e-07	FNAHGDANTIVC[418]NSK
0.1.17822							0	800.85	1599.69	1599.68	0.00402515	MS-GF+ Beta (v9517)	2	7.60424e-07	IINDNATYC[418]R
0.1.16996							0	702.666	2104.98	2104.96	0.0204327	MS-GF+ Beta (v9517)	3	7.62184e-07	KPNVGC[418]QQDSEELLK
0.1.20030							0	525.938	1574.79	1574.78	0.00863751	MS-GF+ Beta (v9517)	3	7.71374e-07	LLKPEC[418]VLDK
0.1.22982							0	933.945	1865.88	1865.87	0.010527	MS-GF+ Beta (v9517)	2	7.80902e-07	SSLQSQC[418]LNEVLK
0.1.16429							0	538.251	1611.73	1611.72	0.013891	MS-GF+ Beta (v9517)	3	7.81292e-07	KPSYAEIC[418]QR
0.1.18417							0	496.906	1487.7	1487.69	0.00735491	MS-GF+ Beta (v9517)	3	7.84414e-07	AVDALLTHC[418]K
0.1.22711							0	813.379	1624.74	1624.73	0.0127183	MS-GF+ Beta (v9517)	2	7.94381e-07	ELEVLLM[16]C[418]NK
0.1.16253							0	721.777	1441.54	1441.52	0.01433	MS-GF+ Beta (v9517)	2	7.94611e-07	NM[16]MAAC[418]DPR
0.1.27731							0	650.339	1947.99	1947.98	0.0147744	MS-GF+ Beta (v9517)	3	8.13803e-07	VAC[418]ITEQVLTLVNK
0.1.23132							0	752.036	2253.09	2253.07	0.0186898	MS-GF+ Beta (v9517)	3	8.17419e-07	AGKPVIC[418]ATQMLESM[16]IK
0.1.22690							0	550.601	1648.78	1648.77	0.0101384	MS-GF+ Beta (v9517)	3	8.26751e-07	GLC[418]AIAQAESLR
0.1.17459							0	514.919	1541.74	1541.72	0.0124094	MS-GF+ Beta (v9517)	3	8.31836e-07	AVAILC[418]NHQR
0.1.16547							0	524.576	1570.71	1570.69	0.0158429	MS-GF+ Beta (v9517)	3	8.39289e-07	EYVKC[418]LENR
0.1.14710							0	525.205	1572.59	1572.58	0.0155496	MS-GF+ Beta (v9517)	3	8.43286e-07	YC[418]DPDSYHR
0.1.15502							0	523.901	1568.68	1568.68	0.00707894	MS-GF+ Beta (v9517)	3	8.5923e-07	VQYPQSQAC[418]K
0.1.14427							0	525.197	1572.57	1572.56	0.00649978	MS-GF+ Beta (v9517)	3	8.64801e-07	AC[418]FHC[57]ETC[57]K
0.1.23796							0	713.818	1425.62	1425.61	0.0128342	MS-GF+ Beta (v9517)	2	8.80399e-07	NC[418]MTDLLAK
0.1.15289							0	565.905	1694.69	1694.69	0.00412976	MS-GF+ Beta (v9517)	3	9.35292e-07	FNNYVDC[418]M[16]KK
0.1.18761							0	526.574	1576.7	1576.69	0.00968107	MS-GF+ Beta (v9517)	3	9.4748e-07	LEGIGQFHC[418]R
0.1.23154							0	835.755	2504.24	2504.23	0.0140235	MS-GF+ Beta (v9517)	3	9.53076e-07	APTC[418]SLDGALPLGAQIPAVHR
0.1.19030							0	796.873	1591.73	1591.72	0.00861077	MS-GF+ Beta (v9517)	2	9.61833e-07	NNTQVLINC[418]R
0.1.20645							0	742.844	1483.67	1483.67	0.00545691	MS-GF+ Beta (v9517)	2	9.66119e-07	STLTDSLVC[418]K
0.1.21674							0	764.856	1527.7	1527.69	0.0118432	MS-GF+ Beta (v9517)	2	9.69159e-07	SAGAC[418]TAAAFLK
0.1.22953							0	638.654	1912.94	1912.93	0.0113636	MS-GF+ Beta (v9517)	3	1.0039e-06	HGVQEC[418]ILLVTQR
0.1.20764							0	742.847	1483.68	1483.67	0.0109501	MS-GF+ Beta (v9517)	2	1.01012e-06	STLTDSLVC[418]K
0.1.19211							0	593.612	1777.81	1777.8	0.0105834	MS-GF+ Beta (v9517)	3	1.01515e-06	DPYGNRPLC[418]IGR
0.1.22717							0	689.294	2064.86	2064.84	0.0211132	MS-GF+ Beta (v9517)	3	1.02396e-06	GTDIM[16]YTGTLDC[418]WR
0.1.16918							0	402.462	1605.82	1605.8	0.0159968	MS-GF+ Beta (v9517)	4	1.03093e-06	KEC[418]PFVIKPK
0.1.23590							0	777.709	2330.1	2330.08	0.0216428	MS-GF+ Beta (v9517)	3	1.04644e-06	ALDRC[418]SEGSFLLTTFPR
0.1.22486							0	816.397	2446.17	2446.18	-0.00697496	MS-GF+ Beta (v9517)	3	1.06291e-06	SSFYVNGLTLGGQKC[418]SVIR
0.1.16701							0	484.236	1449.69	1449.67	0.010859	MS-GF+ Beta (v9517)	3	1.06712e-06	KC[418]AADLGLNK
0.1.16138							0	814.357	1626.7	1626.7	0.004892	MS-GF+ Beta (v9517)	2	1.06973e-06	AGSVATC[418]QAVM[16]R
0.1.13810							0	460.869	1379.58	1379.58	0.00913394	MS-GF+ Beta (v9517)	3	1.07178e-06	AC[418]VGNAYHK
0.1.16170							0	508.548	1522.62	1522.62	0.00551456	MS-GF+ Beta (v9517)	3	1.11581e-06	FLGM[16]HPC[418]ER
0.1.22347							0	724.355	1446.69	1447.7	-1.00065	MS-GF+ Beta (v9517)	2	1.14048e-06	LSC[418]PITALGR
0.1.16291							0	576.274	1725.8	1725.79	0.0146034	MS-GF+ Beta (v9517)	3	1.15046e-06	LHSLQPHAC[418]FR
0.1.22202							0	913.417	1824.82	1824.82	0.00241936	MS-GF+ Beta (v9517)	2	1.17558e-06	SC[418]ENLAPFNTALK
0.1.14476							0	747.852	1493.69	1493.68	0.0137769	MS-GF+ Beta (v9517)	2	1.1877e-06	AETAANRIC[418]K
0.1.16179							0	561.232	1680.67	1680.67	0.0084356	MS-GF+ Beta (v9517)	3	1.19918e-06	SFGAEEHEVC[418]R
0.1.20688							0	757.84	1513.67	1513.66	0.0082091	MS-GF+ Beta (v9517)	2	1.21215e-06	EGVVEC[418]SFVK
0.1.24335							0	581.29	1740.85	1740.83	0.0155313	MS-GF+ Beta (v9517)	3	1.22453e-06	SC[418]LLLQFTDKR
0.1.19358							0	720.317	1438.62	1438.61	0.00789159	MS-GF+ Beta (v9517)	2	1.22668e-06	IGNC[418]PFSQR
0.1.19026							0	791.35	1580.69	1580.68	0.00695626	MS-GF+ Beta (v9517)	2	1.25213e-06	TEM[16]PC[418]QALVR
0.1.13976							0	520.578	1558.71	1558.7	0.0101027	MS-GF+ Beta (v9517)	3	1.25686e-06	KPDSVSLHC[418]R
0.1.16666							0	767.998	2300.97	2300.96	0.0150062	MS-GF+ Beta (v9517)	3	1.27198e-06	LEKC[418]GEDDETIPSEYR
0.1.21711							0	510.239	1527.7	1527.69	0.0109144	MS-GF+ Beta (v9517)	3	1.276e-06	SAGAC[418]TAAAFLK
0.1.14480							0	729.774	1457.53	1457.52	0.0144105	MS-GF+ Beta (v9517)	2	1.276e-06	NM[16]M[16]AAC[418]DPR
0.1.18785							0	789.353	1576.69	1576.69	-0.000620584	MS-GF+ Beta (v9517)	2	1.30373e-06	LEGIGQFHC[418]R
0.1.21274							0	724.872	1447.73	1447.72	0.0083807	MS-GF+ Beta (v9517)	2	1.30405e-06	PVIAC[418]SVTIK
0.1.16166							0	748.841	1495.67	1495.65	0.0121735	MS-GF+ Beta (v9517)	2	1.32732e-06	SVSVTAAGQC[418]R
0.1.18599							0	726.364	1450.71	1450.71	0.00810741	MS-GF+ Beta (v9517)	2	1.33066e-06	KGC[418]VITISGR
0.1.21235							0	515.254	1542.74	1543.73	-0.986941	MS-GF+ Beta (v9517)	3	1.35199e-06	SLHDALC[418]VIR
0.1.20737							0	776.855	1551.7	1551.69	0.0105004	MS-GF+ Beta (v9517)	2	1.35408e-06	VAQLC[418]DFNPK
0.1.18687							0	902.957	1803.9	1803.89	0.00945047	MS-GF+ Beta (v9517)	2	1.36742e-06	ELEKVC[418]NPIITK
0.1.20235							0	789.716	2366.13	2366.11	0.0191958	MS-GF+ Beta (v9517)	3	1.37044e-06	SNC[418]KPSTFAYPAPLEVPK
0.1.21889							0	647.313	1938.92	1938.9	0.0197728	MS-GF+ Beta (v9517)	3	1.37144e-06	AIANEC[418]QANFISIK
0.1.13365							0	677.287	1352.56	1352.55	0.00988125	MS-GF+ Beta (v9517)	2	1.40598e-06	VGTEC[418]GNQK
0.1.19948							0	751.866	1501.72	1501.71	0.0114935	MS-GF+ Beta (v9517)	2	1.41662e-06	SLHDALC[418]VVK
0.1.22593							0	757.707	2270.1	2270.09	0.0117607	MS-GF+ Beta (v9517)	3	1.42658e-06	YKDGVVTIGC[418]VGFPNVGK
0.1.21660							0	854.414	1706.81	1706.8	0.0130285	MS-GF+ Beta (v9517)	2	1.43814e-06	TSAPITC[418]ELLNK
0.1.19154							0	796.873	1591.73	1591.72	0.0084887	MS-GF+ Beta (v9517)	2	1.43978e-06	NNTQVLINC[418]R
0.1.21961							0	657.668	1969.98	1968.96	1.02214	MS-GF+ Beta (v9517)	3	1.44406e-06	FVTSC[418]SRPPLLGFK
0.1.24071							0	753.826	1505.64	1505.63	0.0120183	MS-GF+ Beta (v9517)	2	1.44857e-06	M[16]C[418]LFAGFQR
0.1.26482							0	854.435	1706.86	1706.85	0.00337909	MS-GF+ Beta (v9517)	2	1.4733e-06	IGLIQFC[418]LSAPK
0.1.19837							0	514.56	1540.66	1540.64	0.0135378	MS-GF+ Beta (v9517)	3	1.48622e-06	GALEGSSC[418]PFR
0.1.23302							0	674.008	2019	2018.98	0.0203327	MS-GF+ Beta (v9517)	3	1.51555e-06	LLIDEAILKC[418]DAER
0.1.13135							0	643.595	1927.76	1927.77	-0.000965881	MS-GF+ Beta (v9517)	3	1.52093e-06	HM[16]AAASAEC[418]QNYAK
0.1.19858							0	806.399	1610.78	1610.77	0.0128039	MS-GF+ Beta (v9517)	2	1.52735e-06	LLEC[418]PHLNVR
0.1.23869							0	518.594	1552.76	1552.75	0.00820204	MS-GF+ Beta (v9517)	3	1.52748e-06	IIAIANYVC[418]R
0.1.19209							0	855.857	1709.7	1709.69	0.0103978	MS-GF+ Beta (v9517)	2	1.54033e-06	IGAFGYM[16]EC[418]SAK
0.1.13839							0	529.914	1586.72	1586.71	0.0128658	MS-GF+ Beta (v9517)	3	1.54747e-06	ADVAGPRPC[418]QR
0.1.18970							0	862.872	1723.73	1723.73	0.00316475	MS-GF+ Beta (v9517)	2	1.54985e-06	NM[16]SVHLSPC[418]FR
0.1.24173							0	753.824	1505.63	1505.63	0.00786795	MS-GF+ Beta (v9517)	2	1.59609e-06	M[16]C[418]LFAGFQR
0.1.24485							0	712.354	2134.04	2134.02	0.0165247	MS-GF+ Beta (v9517)	3	1.60088e-06	ILDKC[418]NEIINWLDK
0.1.13042							0	557.909	1670.71	1670.7	0.00589686	MS-GF+ Beta (v9517)	3	1.60832e-06	KC[418]YEM[16]ASHLR
0.1.22585							0	493.572	1477.69	1477.68	0.00850073	MS-GF+ Beta (v9517)	3	1.65278e-06	AAC[418]LPLPGYR
0.1.15068							0	520.247	1557.72	1557.71	0.0120045	MS-GF+ Beta (v9517)	3	1.65298e-06	NIDPKPC[418]TPR
0.1.19160							0	788.867	1575.72	1575.72	0.00133105	MS-GF+ Beta (v9517)	2	1.65795e-06	ALVDGPC[418]TQVR
0.1.26056							0	711.022	2130.04	2129.04	1.00375	MS-GF+ Beta (v9517)	3	1.68606e-06	AC[418]ANPAAGSVILLENLR
0.1.25884							0	903.957	1805.9	1805.88	0.0151739	MS-GF+ Beta (v9517)	2	1.69563e-06	GLSNLFLSC[418]PIPK
0.1.22241							0	728.35	2182.03	2181.02	1.00463	MS-GF+ Beta (v9517)	3	1.7151e-06	VENLFNEKC[418]GEALGLK
0.1.12810							0	660.3	1318.58	1318.58	0.0050981	MS-GF+ Beta (v9517)	2	1.7286e-06	TATAVAHC[418]K
0.1.13840							0	690.799	1379.58	1379.58	0.00862842	MS-GF+ Beta (v9517)	2	1.75498e-06	AC[418]VGNAYHK
0.1.19821							0	771.337	1540.66	1540.64	0.0150159	MS-GF+ Beta (v9517)	2	1.78999e-06	GALEGSSC[418]PFR
0.1.15965							0	544.58	1630.72	1630.71	0.00496747	MS-GF+ Beta (v9517)	3	1.8138e-06	SFGSKC[418]QLSEK
0.1.20522							0	743.846	1485.68	1485.67	0.0090356	MS-GF+ Beta (v9517)	2	1.84459e-06	AC[418]ILC[57]VHPR
0.1.21997							0	710.648	2128.92	2128.91	0.0176365	MS-GF+ Beta (v9517)	3	1.86293e-06	LEDEHLVFFC[418]QM[16]GK
0.1.19810							0	989.887	1977.76	1977.74	0.0141066	MS-GF+ Beta (v9517)	2	1.88597e-06	DLNYC[418]FSGM[16]SDHR
0.1.17236							0	639.794	1277.57	1277.56	0.00991577	MS-GF+ Beta (v9517)	2	1.90773e-06	VAGINAC[418]GR
0.1.26055							0	903.952	1805.89	1805.88	0.00906483	MS-GF+ Beta (v9517)	2	1.91508e-06	SLLINAVEASC[418]IR
0.1.16350							0	690.803	1379.59	1379.58	0.00556838	MS-GF+ Beta (v9517)	2	1.93554e-06	SLSGSSPC[418]PK
0.1.19133							0	734.826	1467.64	1467.63	0.00942158	MS-GF+ Beta (v9517)	2	1.94924e-06	NC[418]LNPQFSK
0.1.21068							0	652.635	1954.88	1954.87	0.0177784	MS-GF+ Beta (v9517)	3	1.95766e-06	ETVSEESNVLC[418]LSK
0.1.14360							0	762.355	1522.69	1522.69	0.00407644	MS-GF+ Beta (v9517)	2	1.96112e-06	VEEIAASKC[418]R
0.1.25037							0	1029.16	3084.45	3084.44	0.0103352	MS-GF+ Beta (v9517)	3	1.96607e-06	LTTPTYGDLNHLVSATM[16]SGVTTC[418]LR
0.1.17060							0	641.323	1920.95	1920.94	0.00919397	MS-GF+ Beta (v9517)	3	1.99369e-06	VIRC[418]M[16]TNTPVVVR
0.1.16609							0	647.633	1939.88	1940.9	-1.02029	MS-GF+ Beta (v9517)	3	1.9986e-06	GAPEGVIDRC[418]THIR
0.1.21325							0	531.258	1590.75	1590.74	0.00897607	MS-GF+ Beta (v9517)	3	2.04924e-06	LQSGIC[418]HLFR
0.1.20182							0	771.844	1541.67	1541.66	0.00828667	MS-GF+ Beta (v9517)	2	2.05461e-06	AAGC[418]DFTNVVK
0.1.21121							0	531.583	1591.73	1591.72	0.012146	MS-GF+ Beta (v9517)	3	2.11275e-06	FC[418]ADLVEHLK
0.1.20233							0	924.4	1846.79	1846.79	-0.00170325	MS-GF+ Beta (v9517)	2	2.13176e-06	DSNNLC[418]LHFNPR
0.1.15602							0	785.348	1568.68	1568.68	0.00642084	MS-GF+ Beta (v9517)	2	2.13514e-06	VQYPQSQAC[418]K
0.1.26131							0	597.308	1788.9	1788.89	0.0087422	MS-GF+ Beta (v9517)	3	2.16624e-06	VPFLVLEC[418]PNLK
0.1.23982							0	915.66	3658.61	3657.61	1.00459	MS-GF+ Beta (v9517)	4	2.21522e-06	AKVDEFPLC[418]GHM[16]VSDEYEQLSSEALEAAR
0.1.20655							0	495.566	1483.68	1483.67	0.0073052	MS-GF+ Beta (v9517)	3	2.25364e-06	STLTDSLVC[418]K
0.1.21187							0	518.252	1551.74	1551.72	0.0138966	MS-GF+ Beta (v9517)	3	2.25568e-06	ATVFLNPAAC[418]K
0.1.23984							0	761.872	1521.73	1521.72	0.00932954	MS-GF+ Beta (v9517)	2	2.25943e-06	ILDILGETC[418]K
0.1.20667							0	603.97	1808.89	1808.88	0.00688346	MS-GF+ Beta (v9517)	3	2.26026e-06	TQKC[418]LQTLLDTK
0.1.20779							0	495.566	1483.68	1483.67	0.00895315	MS-GF+ Beta (v9517)	3	2.29716e-06	STLTDSLVC[418]K
0.1.15404							0	565.908	1694.7	1694.69	0.0121864	MS-GF+ Beta (v9517)	3	2.30157e-06	FNNYVDC[418]M[16]KK
0.1.22351							0	514.275	1539.8	1539.79	0.0090577	MS-GF+ Beta (v9517)	3	2.30535e-06	VIC[418]ILSHPIK
0.1.18586							0	833.394	1664.77	1664.77	0.00870628	MS-GF+ Beta (v9517)	2	2.35121e-06	SVC[418]LIGDKEQR
0.1.16049							0	607.954	1820.84	1820.84	0.00163738	MS-GF+ Beta (v9517)	3	2.3875e-06	VKC[418]SGPGLSPGM[16]VR
0.1.20137							0	669.319	2004.93	2004.92	0.0161022	MS-GF+ Beta (v9517)	3	2.4056e-06	AC[418]PRPEGLNFQDLK
0.1.25110							0	800.885	1599.76	1599.74	0.012678	MS-GF+ Beta (v9517)	2	2.42896e-06	GLSSLLC[418]NFTK
0.1.17073							0	558.588	1672.74	1672.73	0.0135595	MS-GF+ Beta (v9517)	3	2.4737e-06	LKPEYDIM[16]C[418]K
0.1.20583							0	695.306	1388.6	1388.59	0.00528674	MS-GF+ Beta (v9517)	2	2.48715e-06	SAFLC[418]GVM[16]K
0.1.16596							0	472.222	1884.86	1884.84	0.0183782	MS-GF+ Beta (v9517)	4	2.65349e-06	VC[418]HAHPTLSEAFR
0.1.17322							0	503.57	1507.69	1507.68	0.00833988	MS-GF+ Beta (v9517)	3	2.65505e-06	NC[418]LALADDKK
0.1.20780							0	693.325	1384.64	1384.63	0.00905123	MS-GF+ Beta (v9517)	2	2.71388e-06	TYAIC[418]GAIR
0.1.22512							0	615.65	1843.93	1843.91	0.0165365	MS-GF+ Beta (v9517)	3	2.71401e-06	GLLPGC[418]VYHVQLK
0.1.22282							0	988.936	1975.86	1974.84	1.0146	MS-GF+ Beta (v9517)	2	2.71776e-06	IIPGFM[16]C[418]QGGDFTR
0.1.24162							0	821.064	2460.17	2459.17	0.99857	MS-GF+ Beta (v9517)	3	2.71951e-06	IYHPNINSNGSIC[418]LDILR
0.1.14895							0	587.622	1759.84	1759.82	0.0184484	MS-GF+ Beta (v9517)	3	2.7725e-06	QRPGQQVATC[418]VR
0.1.11963							0	442.197	1323.57	1323.56	0.0105601	MS-GF+ Beta (v9517)	3	2.77413e-06	KTPC[418]GEGSK
0.1.11961							0	662.792	1323.57	1323.56	0.0111532	MS-GF+ Beta (v9517)	2	2.77552e-06	KTPC[418]GEGSK
0.1.16665							0	742.328	1482.64	1482.63	0.0109017	MS-GF+ Beta (v9517)	2	2.78183e-06	VLTM[16]PETC[418]R
0.1.11838							0	442.194	1323.56	1323.56	0.00177106	MS-GF+ Beta (v9517)	3	2.78567e-06	KTPC[418]GEGSK
0.1.22907							0	867.42	1732.83	1732.83	-0.00225823	MS-GF+ Beta (v9517)	2	2.79038e-06	VDLSQPLIATC[418]R
0.1.15354							0	599.298	1794.87	1794.87	0.00557112	MS-GF+ Beta (v9517)	3	2.80644e-06	KNC[418]PHIVVGTPGR
0.1.20343							0	884.907	1767.8	1767.8	0.00374148	MS-GF+ Beta (v9517)	2	2.8625e-06	AVYTQDC[418]PLAAAK
0.1.18527							0	904.878	1807.74	1807.74	0.000395983	MS-GF+ Beta (v9517)	2	2.86965e-06	STAC[57]QM[16]LVC[418]YAK
0.1.23761							0	764.396	1526.78	1526.77	0.00426455	MS-GF+ Beta (v9517)	2	2.90889e-06	LIC[418]PAILNPR
0.1.19742							0	927.427	1852.84	1852.83	0.0114552	MS-GF+ Beta (v9517)	2	2.95443e-06	AGQC[418]VIGLQM[16]GTNK
0.1.17258							0	846.716	2537.12	2537.1	0.0221907	MS-GF+ Beta (v9517)	3	3.00869e-06	KYEDIC[418]PSTHNM[16]DVPNIK
0.1.19910							0	724.831	1447.65	1447.64	0.00926059	MS-GF+ Beta (v9517)	2	3.01829e-06	ALQNC[418]PWAK
0.1.16379							0	781.308	1560.6	1560.59	0.0110905	MS-GF+ Beta (v9517)	2	3.08457e-06	SGQGAFGNM[16]C[418]R
0.1.19297							0	544.911	1631.71	1631.7	0.0146653	MS-GF+ Beta (v9517)	3	3.10782e-06	TTQFSC[418]TLGEK
0.1.19801							0	519.925	1556.75	1556.74	0.0153045	MS-GF+ Beta (v9517)	3	3.15186e-06	SLTIAEFKC[418]K
0.1.17736							0	773.817	1545.62	1545.61	0.0150259	MS-GF+ Beta (v9517)	2	3.15544e-06	SSGC[418]FPNM[16]AAK
0.1.20773							0	617.636	1849.89	1849.87	0.0116595	MS-GF+ Beta (v9517)	3	3.18103e-06	TC[418]TDIKPEWLVK
0.1.20499							0	758.652	2272.93	2272.93	0.00796231	MS-GF+ Beta (v9517)	3	3.19624e-06	HM[16]SEFM[16]EC[418]NLNELVK
0.1.26403							0	794.427	1586.84	1586.83	0.00827311	MS-GF+ Beta (v9517)	2	3.2529e-06	LLPAITILGC[418]R
0.1.21313							0	913.408	1824.8	1824.79	0.0120021	MS-GF+ Beta (v9517)	2	3.29385e-06	PM[16]C[418]IPPSYADLGK
0.1.18852							0	514.586	1540.73	1540.73	0.00698697	MS-GF+ Beta (v9517)	3	3.31403e-06	GC[418]HLLVATPGR
0.1.14834							0	488.568	1462.68	1462.67	0.0125277	MS-GF+ Beta (v9517)	3	3.46983e-06	VKC[418]SGPGLER
0.1.15151							0	637.976	1910.91	1910.89	0.0153617	MS-GF+ Beta (v9517)	3	3.47552e-06	KAVVVC[418]PKDEDYK
0.1.17185							0	789.908	1577.8	1577.79	0.0070291	MS-GF+ Beta (v9517)	2	3.51752e-06	LLIEKC[418]NTVK
0.1.21371							0	767.365	1532.71	1532.71	0.00323846	MS-GF+ Beta (v9517)	2	3.53986e-06	GVEIC[418]IATPGR
0.1.16304							0	956.767	2867.28	2867.27	0.00772418	MS-GF+ Beta (v9517)	3	3.57337e-06	VGEVC[57]HITC[418]KPEYAYGSAGSPPK
0.1.16489							0	469.227	1404.66	1404.65	0.00632173	MS-GF+ Beta (v9517)	3	3.59585e-06	LHSVC[418]TLSK
0.1.21463							0	517.94	1550.8	1549.78	1.01964	MS-GF+ Beta (v9517)	3	3.63484e-06	KC[418]PFIVALNK
0.1.18992							0	478.555	1432.64	1432.64	0.00558654	MS-GF+ Beta (v9517)	3	3.6364e-06	FSVPHVC[418]AR
0.1.15452							0	626.283	1250.55	1250.54	0.00909897	MS-GF+ Beta (v9517)	2	3.63868e-06	ITGC[418]ASPGK
0.1.18546							0	787.881	1573.75	1573.74	0.00928213	MS-GF+ Beta (v9517)	2	3.6456e-06	GLC[418]GAIHSSIAK
0.1.11837							0	662.79	1323.56	1323.56	0.00614836	MS-GF+ Beta (v9517)	2	3.66986e-06	KTPC[418]GEGSK
0.1.14313							0	764.267	1526.52	1526.52	0.00161959	MS-GF+ Beta (v9517)	2	3.73821e-06	YDDM[16]ATC[418]M[16]K
0.1.20755							0	747.806	1493.6	1493.59	0.00897514	MS-GF+ Beta (v9517)	2	3.84519e-06	QM[16]YC[418]VFNR
0.1.27482							0	626.976	1877.91	1877.89	0.0151468	MS-GF+ Beta (v9517)	3	3.86312e-06	NILEESLC[418]ELVAK
0.1.14769							0	691.31	1380.61	1380.6	0.0108103	MS-GF+ Beta (v9517)	2	3.87955e-06	TVYC[418]NVHK
0.1.22398							0	770.91	1539.81	1539.79	0.010841	MS-GF+ Beta (v9517)	2	3.91989e-06	VIC[418]ILSHPIK
0.1.24114							0	757.01	2268.01	2268	0.0105822	MS-GF+ Beta (v9517)	3	3.9771e-06	FSPNSSNPIIVSC[418]GWDK
0.1.22584							0	765.901	1529.79	1529.77	0.0146087	MS-GF+ Beta (v9517)	2	3.98727e-06	AVLAQLGC[418]PIK
0.1.14807							0	712.315	1422.62	1422.61	0.00927886	MS-GF+ Beta (v9517)	2	4.00386e-06	SVHYC[418]PATK
0.1.15954							0	731.356	1460.7	1460.69	0.00654556	MS-GF+ Beta (v9517)	2	4.03736e-06	KAQC[418]PIVER
0.1.16026							0	731.354	1460.69	1460.69	0.00300552	MS-GF+ Beta (v9517)	2	4.0374e-06	KAQC[418]PIVER
0.1.23772							0	776.884	1551.75	1551.74	0.0104807	MS-GF+ Beta (v9517)	2	4.06543e-06	TTLC[418]VSILER
0.1.19095							0	531.585	1591.73	1591.72	0.00987923	MS-GF+ Beta (v9517)	3	4.25117e-06	NNTQVLINC[418]R
0.1.19768							0	556.915	1667.72	1667.71	0.0116772	MS-GF+ Beta (v9517)	3	4.26958e-06	DKVNC[418]SFYFK
0.1.23614							0	731.814	1461.61	1461.61	0.00802629	MS-GF+ Beta (v9517)	2	4.33582e-06	NC[418]FASVFEK
0.1.13102							0	502.903	1505.69	1505.69	0.000271945	MS-GF+ Beta (v9517)	3	4.35765e-06	ATAVSRPC[418]AGR
0.1.18440							0	640.318	1278.62	1278.61	0.0113596	MS-GF+ Beta (v9517)	2	4.4117e-06	LAAVVSAC[418]K
0.1.22987							0	622.965	1865.87	1865.87	0.0069737	MS-GF+ Beta (v9517)	3	4.51629e-06	SSLQSQC[418]LNEVLK
0.1.23626							0	602.919	1805.73	1804.72	1.01192	MS-GF+ Beta (v9517)	3	4.54419e-06	GFC[418]FLEYEDHK
0.1.19836							0	1007.46	2012.91	2012.9	0.0124813	MS-GF+ Beta (v9517)	2	4.62084e-06	TSESLC[418]QNNM[16]VILK
0.1.24865							0	739.823	1477.63	1477.62	0.012429	MS-GF+ Beta (v9517)	2	4.79454e-06	C[57]FSVLGFC[418]K
0.1.18831							0	588.608	1762.8	1762.8	-0.000371105	MS-GF+ Beta (v9517)	3	4.81307e-06	RLC[418]QENQWLR
0.1.20379							0	750.342	1498.67	1497.66	1.00605	MS-GF+ Beta (v9517)	2	4.8283e-06	AIC[418]IDPAYSK
0.1.22242							0	576.274	1725.8	1725.79	0.0137436	MS-GF+ Beta (v9517)	3	4.92164e-06	AVASQLDC[418]NFLK
0.1.17613							0	727.984	2180.93	2180.92	0.013794	MS-GF+ Beta (v9517)	3	5.00445e-06	SSEHINEGETAM[16]LVC[418]K
0.1.15093							0	779.867	1557.72	1557.71	0.0122619	MS-GF+ Beta (v9517)	2	5.10275e-06	NIDPKPC[418]TPR
0.1.24712							0	599.608	1795.8	1795.78	0.0171088	MS-GF+ Beta (v9517)	3	5.13776e-06	LPC[418]IFIC[57]ENNR
0.1.21079							0	738.361	1474.71	1474.69	0.0134814	MS-GF+ Beta (v9517)	2	5.20817e-06	QELGIC[418]PAVK
0.1.17761							0	762.849	1523.68	1523.67	0.0091966	MS-GF+ Beta (v9517)	2	5.23277e-06	INSITVDNC[418]K
0.1.20792							0	632.651	1894.93	1894.92	0.0129561	MS-GF+ Beta (v9517)	3	5.32617e-06	RC[418]LYASVLTAQPR
0.1.25270							0	569.951	1706.83	1706.82	0.0136283	MS-GF+ Beta (v9517)	3	5.35805e-06	TTSQLC[418]WPLLK
0.1.25337							0	780.043	2337.11	2337.09	0.0160594	MS-GF+ Beta (v9517)	3	5.43189e-06	M[16]LSAVSQQVQC[418]IQEALR
0.1.22161							0	988.431	1974.85	1974.84	0.00569284	MS-GF+ Beta (v9517)	2	5.57024e-06	IIPGFM[16]C[418]QGGDFTR
0.1.19341							0	800.872	1599.73	1599.72	0.0129277	MS-GF+ Beta (v9517)	2	5.72607e-06	KETGAASFLC[418]R
0.1.14755							0	474.889	1421.64	1421.63	0.0127126	MS-GF+ Beta (v9517)	3	5.76209e-06	GPTKEELC[418]K
0.1.17634							0	834.399	1666.78	1666.77	0.013084	MS-GF+ Beta (v9517)	2	5.82106e-06	NC[418]PHIVVGTPGR
0.1.22620							0	742.843	1483.67	1483.66	0.012057	MS-GF+ Beta (v9517)	2	5.86845e-06	SITC[418]WTLSR
0.1.19347							0	757.69	2270.05	2270.03	0.0201228	MS-GF+ Beta (v9517)	3	5.98998e-06	VQRPC[418]TSTPM[16]IDSFVR
0.1.14312							0	585.276	1752.8	1752.8	0.0083377	MS-GF+ Beta (v9517)	3	6.21303e-06	FHTVSGSKC[418]EIK
0.1.26200							0	649.296	1944.87	1944.85	0.0116138	MS-GF+ Beta (v9517)	3	6.25539e-06	SIQFVDWC[418]PTGFK
0.1.13651							0	597.456	3578.69	3578.67	0.0258134	MS-GF+ Beta (v9517)	6	6.37708e-06	SLENETLNKEEDC[418]HSPTSKPPKPDQPLK
0.1.23212							0	496.921	1487.74	1487.73	0.0142738	MS-GF+ Beta (v9517)	3	6.38285e-06	VSPC[418]LPVLSR
0.1.24843							0	692.652	2074.94	2074.92	0.0151341	MS-GF+ Beta (v9517)	3	6.64144e-06	EFLFNAIETM[16]PC[418]VK
0.1.16638							0	494.24	1479.7	1479.69	0.0132948	MS-GF+ Beta (v9517)	3	6.80719e-06	ELAETIKC[418]R
0.1.18750							0	514.587	1540.74	1540.73	0.00991666	MS-GF+ Beta (v9517)	3	6.80983e-06	GC[418]HLLVATPGR
0.1.15474							0	502.241	1503.7	1503.7	0.00462487	MS-GF+ Beta (v9517)	3	6.96003e-06	AAVPDAVGKC[418]R
0.1.15450							0	578.577	1732.71	1732.7	0.00904296	MS-GF+ Beta (v9517)	3	7.07315e-06	EC[57]GHDVTC[418]PVAK
0.1.16035							0	502.254	1503.74	1503.73	0.00623375	MS-GF+ Beta (v9517)	3	7.07919e-06	LNKC[418]GVISPR
0.1.12975							0	483.541	1447.6	1447.6	0.00430644	MS-GF+ Beta (v9517)	3	7.24973e-06	HC[418]SQVDSVR
0.1.13572							0	713.323	2136.95	2136.94	0.0107143	MS-GF+ Beta (v9517)	3	7.33509e-06	IHEGC[418]EEPATHNALAK
0.1.16752							0	525.911	1574.71	1574.7	0.0138453	MS-GF+ Beta (v9517)	3	7.35904e-06	TC[418]VQEITAHR
0.1.13792							0	791.846	1581.68	1581.67	0.0101897	MS-GF+ Beta (v9517)	2	7.43427e-06	TGSQGQC[418]TQVR
0.1.13512							0	623.518	2490.04	2490.03	0.017424	MS-GF+ Beta (v9517)	4	7.55522e-06	KGEDEDKGPPC[57]GPVNC[418]NEK
0.1.25256							0	854.421	1706.83	1706.82	0.0112001	MS-GF+ Beta (v9517)	2	7.61306e-06	TTSQLC[418]WPLLK
0.1.16409							0	521.208	1560.6	1560.59	0.0104668	MS-GF+ Beta (v9517)	3	7.63767e-06	SGQGAFGNM[16]C[418]R
0.1.13387							0	642.766	1283.52	1283.51	0.00686719	MS-GF+ Beta (v9517)	2	7.73109e-06	ANAAAM[16]C[418]AK
0.1.24274							0	755.035	2262.08	2262.06	0.0221674	MS-GF+ Beta (v9517)	3	7.97847e-06	VAEGQVTC[418]PYLPPFPAR
0.1.16076							0	651.973	1952.9	1952.89	0.0112085	MS-GF+ Beta (v9517)	3	8.10094e-06	ELHGQNPVVTPC[418]NK
0.1.24834							0	561.279	1680.81	1680.8	0.0106487	MS-GF+ Beta (v9517)	3	8.17278e-06	M[16]ININILSVC[418]K
0.1.13188							0	569.247	1704.72	1704.71	0.00970029	MS-GF+ Beta (v9517)	3	8.38555e-06	ATGHSGGGC[418]ISQGR
0.1.14910							0	500.875	1499.6	1499.59	0.0101548	MS-GF+ Beta (v9517)	3	8.52343e-06	SC[418]ATFSSSHR
0.1.17267							0	537.251	1608.73	1608.72	0.0148384	MS-GF+ Beta (v9517)	3	8.608e-06	FAC[418]HSASLTVR
0.1.21530							0	824.072	2469.19	2467.19	2.00519	MS-GF+ Beta (v9517)	3	8.6449e-06	IQEKC[418]QLEINFNTLQTK
0.1.20497							0	835.362	1668.71	1668.7	0.00636513	MS-GF+ Beta (v9517)	2	8.67549e-06	QAVDSPAASFC[418]R
0.1.23660							0	792.882	1583.75	1583.74	0.0128445	MS-GF+ Beta (v9517)	2	8.76701e-06	LLYEALVDC[418]K
0.1.8828							0	518.573	1552.7	1552.69	0.0109572	MS-GF+ Beta (v9517)	3	8.76761e-06	KRC[418]PSQSSSR
0.1.19823							0	890.899	1779.78	1779.77	0.0130245	MS-GF+ Beta (v9517)	2	8.82718e-06	GTLTLC[418]PYHSDR
0.1.22018							0	535.581	1603.72	1603.71	0.0149566	MS-GF+ Beta (v9517)	3	9.11253e-06	YSYVC[418]PDLVK
0.1.16388							0	458.875	1373.6	1373.6	0.00345472	MS-GF+ Beta (v9517)	3	9.17446e-06	YIC[418]PHAPR
0.1.20270							0	707.35	2119.03	2119.01	0.0197277	MS-GF+ Beta (v9517)	3	9.19016e-06	LIEDGRGC[418]EVIQEIK
0.1.24151							0	829.409	1656.8	1656.79	0.0142799	MS-GF+ Beta (v9517)	2	9.22319e-06	TLVTSC[418]FLVEK
0.1.13979							0	694.296	1386.58	1386.57	0.0077005	MS-GF+ Beta (v9517)	2	9.25948e-06	DFNTNKC[418]K
0.1.23380							0	711.828	1421.64	1421.65	-0.00671119	MS-GF+ Beta (v9517)	2	9.38224e-06	LGEWVGLC[418]K
0.1.22167							0	664.683	1991.03	1991.01	0.0137212	MS-GF+ Beta (v9517)	3	9.39491e-06	LQHINPLLPAC[418]LNK
0.1.20745							0	597.94	1790.8	1790.79	0.0127738	MS-GF+ Beta (v9517)	3	9.74574e-06	HGFC[418]GIPITDTGR
0.1.23708							0	828.081	2481.22	2481.2	0.0179259	MS-GF+ Beta (v9517)	3	1.01855e-05	LAGANPAVITC[418]DELLLGHEK
0.1.22646							0	726.349	1450.68	1450.67	0.00934224	MS-GF+ Beta (v9517)	2	1.02572e-05	LWNTLGVC[418]K
0.1.16531							0	476.224	1425.65	1425.64	0.0113558	MS-GF+ Beta (v9517)	3	1.05672e-05	ISIC[418]SSDKR
0.1.14908							0	796.009	2385	2384.99	0.014734	MS-GF+ Beta (v9517)	3	1.11001e-05	TYPGVM[16]HSSC[418]PQEM[16]AAVK
0.1.20963							0	764.852	1527.69	1527.67	0.015142	MS-GF+ Beta (v9517)	2	1.12735e-05	FGEVVDC[418]TIK
0.1.13143							0	609.775	1217.54	1217.53	0.00419259	MS-GF+ Beta (v9517)	2	1.13161e-05	VAGC[418]SVHK
0.1.25908							0	602.975	1805.9	1805.88	0.0182734	MS-GF+ Beta (v9517)	3	1.14461e-05	GLSNLFLSC[418]PIPK
0.1.18966							0	593.267	1776.78	1776.77	0.0126104	MS-GF+ Beta (v9517)	3	1.14848e-05	LLEC[418]HFM[16]PPEK
0.1.15014							0	526.579	1576.72	1576.7	0.0132792	MS-GF+ Beta (v9517)	3	1.15295e-05	GHHGC[418]PLVSPR
0.1.20623							0	597.937	1790.79	1790.79	0.00306924	MS-GF+ Beta (v9517)	3	1.16404e-05	HGFC[418]GIPITDTGR
0.1.21701							0	733.328	1464.64	1464.63	0.0134818	MS-GF+ Beta (v9517)	2	1.17152e-05	AVQDLC[418]GWR
0.1.16526							0	521.208	1560.6	1560.59	0.0128472	MS-GF+ Beta (v9517)	3	1.17248e-05	SGQGAFGNM[16]C[418]R
0.1.16722							0	487.921	1460.74	1460.73	0.0135733	MS-GF+ Beta (v9517)	3	1.17422e-05	QVLIRPC[418]SK
0.1.22712							0	542.588	1624.74	1624.73	0.0131933	MS-GF+ Beta (v9517)	3	1.17661e-05	ELEVLLM[16]C[418]NK
0.1.23641							0	666.814	1331.61	1331.6	0.0100932	MS-GF+ Beta (v9517)	2	1.19981e-05	LFC[418]VGFTK
0.1.16052							0	752.877	1503.74	1503.73	0.00633859	MS-GF+ Beta (v9517)	2	1.2441e-05	LNKC[418]GVISPR
0.1.20880							0	709.305	1416.6	1416.59	0.00805278	MS-GF+ Beta (v9517)	2	1.26071e-05	M[16]VDQLFC[418]K
0.1.15895							0	854.39	1706.76	1706.76	0.00698901	MS-GF+ Beta (v9517)	2	1.26595e-05	TIC[418]SHVQNM[16]IK
0.1.16222							0	502.908	1505.7	1505.69	0.0156528	MS-GF+ Beta (v9517)	3	1.27165e-05	NC[418]VAIAADRR
0.1.20911							0	521.943	1562.81	1562.79	0.0115032	MS-GF+ Beta (v9517)	3	1.27436e-05	SLLALKEC[418]IR
0.1.18989							0	623.638	1867.89	1867.88	0.00945644	MS-GF+ Beta (v9517)	3	1.27931e-05	ERPLC[418]PLQPQNR
0.1.20494							0	820.915	1639.82	1639.81	0.00602747	MS-GF+ Beta (v9517)	2	1.29473e-05	QKVC[418]LDIIYK
0.1.14531							0	749.267	1496.52	1496.51	0.0118181	MS-GF+ Beta (v9517)	2	1.30553e-05	YDDM[16]AAC[418]M[16]K
0.1.16728							0	472.221	1884.86	1884.84	0.0159368	MS-GF+ Beta (v9517)	4	1.30656e-05	VC[418]HAHPTLSEAFR
0.1.19022							0	500.566	1498.68	1498.67	0.00749233	MS-GF+ Beta (v9517)	3	1.31233e-05	KC[418]TLDQAFR
0.1.19517							0	723.996	2168.97	2168.97	0.000862548	MS-GF+ Beta (v9517)	3	1.35672e-05	DKFNEC[418]GHVLYADIK
0.1.21369							0	542.893	1625.66	1625.65	0.0058154	MS-GF+ Beta (v9517)	3	1.36004e-05	YM[16]AC[418]C[57]LLYR
0.1.18774							0	850.909	1699.8	1699.79	0.010175	MS-GF+ Beta (v9517)	2	1.36501e-05	HIGVC[418]ISVANNR
0.1.17362							0	648.296	1294.58	1294.57	0.00961762	MS-GF+ Beta (v9517)	2	1.37745e-05	GC[418]EVVVSGK
0.1.22574							0	739.854	1477.69	1477.68	0.00930747	MS-GF+ Beta (v9517)	2	1.39163e-05	AAC[418]LPLPGYR
0.1.16713							0	725.852	1449.69	1449.67	0.0145954	MS-GF+ Beta (v9517)	2	1.39497e-05	KC[418]AADLGLNK
0.1.17303							0	728.689	2183.04	2183.03	0.019131	MS-GF+ Beta (v9517)	3	1.41872e-05	EIVHIQAGQC[418]GNQIGAK
0.1.15349							0	615.607	1843.8	1843.8	0.0025602	MS-GF+ Beta (v9517)	3	1.50772e-05	LISEM[16]C[57]C[418]EAVKK
0.1.25738							0	709.001	2123.98	2123.97	0.016944	MS-GF+ Beta (v9517)	3	1.50978e-05	SGC[418]IVNNLAEFTVDPK
0.1.16038							0	658.815	1315.62	1315.62	-0.000371758	MS-GF+ Beta (v9517)	2	1.5231e-05	IAVHC[418]TVR
0.1.22116							0	710.646	2128.92	2128.91	0.0112279	MS-GF+ Beta (v9517)	3	1.5449e-05	LEDEHLVFFC[418]QM[16]GK
0.1.15258							0	581.262	1740.76	1740.76	0.00425689	MS-GF+ Beta (v9517)	3	1.55825e-05	NSAKDC[418]YPAVQK
0.1.15950							0	487.906	1460.7	1460.69	0.00518951	MS-GF+ Beta (v9517)	3	1.56204e-05	KAQC[418]PIVER
0.1.15045							0	660.304	1318.59	1318.58	0.0130327	MS-GF+ Beta (v9517)	2	1.61011e-05	HTNSVIC[418]K
0.1.15286							0	457.209	1368.61	1368.6	0.00991205	MS-GF+ Beta (v9517)	3	1.63113e-05	RVPC[418]AYDK
0.1.15498							0	752.859	1503.7	1503.7	0.00646921	MS-GF+ Beta (v9517)	2	1.67369e-05	AAVPDAVGKC[418]R
0.1.14157							0	445.963	1779.82	1779.81	0.0166515	MS-GF+ Beta (v9517)	4	1.70379e-05	YHQIGSGKC[418]EIK
0.1.20606							0	671.34	1340.67	1340.66	0.00302523	MS-GF+ Beta (v9517)	2	1.74105e-05	AVLC[418]PPPVK
0.1.20493							0	671.342	1340.67	1340.66	0.00717562	MS-GF+ Beta (v9517)	2	1.74105e-05	AVLC[418]PPPVK
0.1.19311							0	500.917	1499.73	1499.72	0.0140631	MS-GF+ Beta (v9517)	3	1.75729e-05	TIIFC[418]ETKK
0.1.24415							0	727.592	2906.34	2906.31	0.0235922	MS-GF+ Beta (v9517)	4	1.75959e-05	DTGTVHLNELGNTQNFM[16]LLC[418]PR
0.1.16501							0	662.772	1323.53	1323.52	0.0128041	MS-GF+ Beta (v9517)	2	1.76822e-05	SAC[57]GVC[418]PGR
0.1.15415							0	631.278	1260.54	1260.54	0.00436037	MS-GF+ Beta (v9517)	2	1.82062e-05	VPQC[418]PSGR
0.1.23677							0	622.272	1863.79	1863.79	0.00573139	MS-GF+ Beta (v9517)	3	1.87711e-05	YGYEIPVDM[16]LC[418]K
0.1.14949							0	502.592	1504.75	1504.74	0.0110126	MS-GF+ Beta (v9517)	3	1.88113e-05	KELC[418]ELKPK
0.1.23074							0	711.845	1421.68	1421.67	0.0068274	MS-GF+ Beta (v9517)	2	1.88642e-05	SVLGGDC[418]LLK
0.1.22477							0	571.93	1712.77	1711.75	1.01609	MS-GF+ Beta (v9517)	3	1.88704e-05	QGFGNLPIC[418]M[16]AK
0.1.16053							0	439.547	1315.62	1315.62	0.00397897	MS-GF+ Beta (v9517)	3	1.88901e-05	IAVHC[418]TVR
0.1.22224							0	752.342	1502.67	1502.66	0.011745	MS-GF+ Beta (v9517)	2	1.92861e-05	LYC[418]PVEFSK
0.1.21881							0	704.3	1406.59	1406.57	0.0116483	MS-GF+ Beta (v9517)	2	1.95001e-05	EC[418]ADLWPR
0.1.22935							0	578.619	1732.84	1732.83	0.00737204	MS-GF+ Beta (v9517)	3	1.95835e-05	VDLSQPLIATC[418]R
0.1.16932							0	793.315	1584.62	1584.6	0.0157209	MS-GF+ Beta (v9517)	2	1.96633e-05	EGALC[418]EENM[16]R
0.1.20424							0	908.939	1815.86	1815.86	-0.000797799	MS-GF+ Beta (v9517)	2	1.9773e-05	ASAGPQPLLVQSC[418]K
0.1.19253							0	444.882	1331.62	1331.62	0.00864268	MS-GF+ Beta (v9517)	3	1.99444e-05	HIAVFPC[418]K
0.1.24637							0	723.38	1444.75	1443.74	1.00879	MS-GF+ Beta (v9517)	2	2.02683e-05	VVLPC[418]NLLR
0.1.19874							0	582.941	1745.8	1745.79	0.00846119	MS-GF+ Beta (v9517)	3	2.0549e-05	HEC[418]M[16]APLTALVK
0.1.13787							0	471.202	1410.58	1410.57	0.0102978	MS-GF+ Beta (v9517)	3	2.05791e-05	M[16]LPDKDC[418]R
0.1.16536							0	806.837	1611.66	1611.65	0.011283	MS-GF+ Beta (v9517)	2	2.07928e-05	AEC[418]M[16]LQQAER
0.1.22564							0	698.348	1394.68	1394.67	0.0119862	MS-GF+ Beta (v9517)	2	2.08826e-05	TTSILC[418]LAR
0.1.13659							0	471.201	1410.58	1410.57	0.00892454	MS-GF+ Beta (v9517)	3	2.106e-05	M[16]LPDKDC[418]R
0.1.15416							0	679.264	1356.51	1356.51	0.00605012	MS-GF+ Beta (v9517)	2	2.11742e-05	C[57]AQGC[418]IC[57]K
0.1.13708							0	706.299	1410.58	1410.57	0.0104332	MS-GF+ Beta (v9517)	2	2.12324e-05	M[16]LPDKDC[418]R
0.1.23253							0	925.933	1849.85	1849.84	0.0135124	MS-GF+ Beta (v9517)	2	2.12979e-05	GYLGPEQLPDC[418]LK
0.1.22129							0	657.772	1313.53	1313.52	0.00932246	MS-GF+ Beta (v9517)	2	2.17485e-05	WDFTPC[418]K
0.1.14443							0	537.237	1608.69	1608.68	0.0105691	MS-GF+ Beta (v9517)	3	2.19884e-05	M[16]VYYGKPSC[418]K
0.1.16623							0	468.229	1401.66	1401.65	0.0104735	MS-GF+ Beta (v9517)	3	2.22922e-05	KC[418]ILAGDHK
0.1.15274							0	420.868	1259.58	1259.58	0.00346324	MS-GF+ Beta (v9517)	3	2.23518e-05	IVGC[418]SVHK
0.1.20910							0	693.324	1384.63	1384.63	0.00685396	MS-GF+ Beta (v9517)	2	2.30004e-05	TYAIC[418]GAIR
0.1.13117							0	406.853	1217.54	1217.53	0.00381309	MS-GF+ Beta (v9517)	3	2.30109e-05	VAGC[418]SVHK
0.1.15748							0	578.597	1732.77	1732.75	0.0142251	MS-GF+ Beta (v9517)	3	2.32311e-05	KGDEC[418]ELLGHSK
0.1.17030							0	669.307	1336.6	1336.59	0.0100363	MS-GF+ Beta (v9517)	2	2.34171e-05	ANAC[418]NSVIK
0.1.23036							0	877.882	1753.75	1753.74	0.0111547	MS-GF+ Beta (v9517)	2	2.34474e-05	AC[57]GNFGIPC[418]ELR
0.1.23032							0	666.351	1330.69	1330.68	0.00922575	MS-GF+ Beta (v9517)	2	2.38241e-05	LPVLAGC[418]LK
0.1.17108							0	837.374	1672.73	1672.73	0.00429545	MS-GF+ Beta (v9517)	2	2.39047e-05	LKPEYDIM[16]C[418]K
0.1.16707							0	722.285	1442.56	1442.55	0.0100422	MS-GF+ Beta (v9517)	2	2.43931e-05	M[16]M[16]IPDC[418]QR
0.1.19161							0	636.794	1271.57	1271.57	0.00595137	MS-GF+ Beta (v9517)	2	2.48669e-05	VC[418]ASVTFK
0.1.16284							0	756.305	1510.6	1510.58	0.0135015	MS-GF+ Beta (v9517)	2	2.5077e-05	DTIC[418]NQDER
0.1.21199							0	693.794	1385.57	1385.56	0.0106428	MS-GF+ Beta (v9517)	2	2.51253e-05	FDEC[418]VLDK
0.1.15148							0	420.871	1259.59	1259.58	0.0106959	MS-GF+ Beta (v9517)	3	2.51352e-05	IVGC[418]SVHK
0.1.22696							0	660.82	1319.63	1319.62	0.00984615	MS-GF+ Beta (v9517)	2	2.53699e-05	PAC[418]PLFVR
0.1.19007							0	605.934	1814.78	1814.77	0.00953631	MS-GF+ Beta (v9517)	3	2.5402e-05	NLETFC[418]EETRR
0.1.13140							0	557.909	1670.7	1670.7	0.00461512	MS-GF+ Beta (v9517)	3	2.55309e-05	KC[418]YEM[16]ASHLR
0.1.18422							0	483.915	1448.72	1448.72	0.00786942	MS-GF+ Beta (v9517)	3	2.55383e-05	LQIELGKC[418]K
0.1.15645							0	733.349	1464.68	1464.67	0.00882624	MS-GF+ Beta (v9517)	2	2.55689e-05	KC[418]LEEQGLK
0.1.9878							0	418.851	1253.53	1253.53	0.00371597	MS-GF+ Beta (v9517)	3	2.61072e-05	KNASC[418]GTR
0.1.15655							0	489.236	1464.69	1464.67	0.012292	MS-GF+ Beta (v9517)	3	2.62863e-05	KC[418]LEEQGLK
0.1.20534							0	447.897	1340.67	1340.66	0.00826097	MS-GF+ Beta (v9517)	3	2.63126e-05	AVLC[418]PPPVK
0.1.16315							0	635.769	1269.52	1269.52	0.00359072	MS-GF+ Beta (v9517)	2	2.64144e-05	M[16]GVVEC[418]AK
0.1.19110							0	739.354	1476.69	1476.69	0.00760262	MS-GF+ Beta (v9517)	2	2.66612e-05	NIC[418]QQVNIK
0.1.13589							0	706.298	1410.58	1410.57	0.0075035	MS-GF+ Beta (v9517)	2	2.6662e-05	M[16]LPDKDC[418]R
0.1.25742							0	711.355	1420.7	1420.68	0.0119612	MS-GF+ Beta (v9517)	2	2.68769e-05	GC[418]ILTLVER
0.1.17798							0	610.296	1827.87	1827.86	0.0105915	MS-GF+ Beta (v9517)	3	2.72201e-05	LLEKC[418]AM[16]TALSSK
0.1.23711							0	661.31	1320.61	1320.6	0.0059331	MS-GF+ Beta (v9517)	2	2.7262e-05	WLC[418]PLSGK
0.1.19558							0	664.302	1326.59	1326.58	0.0037969	MS-GF+ Beta (v9517)	2	2.75921e-05	SC[418]QFVAVR
0.1.15169							0	630.802	1259.59	1259.58	0.0109533	MS-GF+ Beta (v9517)	2	2.79981e-05	IVGC[418]SVHK
0.1.15798							0	459.203	1374.59	1374.58	0.0110358	MS-GF+ Beta (v9517)	3	2.83098e-05	GKVC[418]FEM[16]K
0.1.14851							0	732.349	1462.68	1462.67	0.0134871	MS-GF+ Beta (v9517)	2	2.83291e-05	VKC[418]SGPGLER
0.1.20660							0	787.355	1572.69	1572.69	0.00581871	MS-GF+ Beta (v9517)	2	2.87132e-05	TVFC[418]M[16]QLAAR
0.1.13551							0	523.556	1567.65	1567.64	0.00764095	MS-GF+ Beta (v9517)	3	2.88961e-05	ERIC[418]SEEER
0.1.18764							0	716.32	1430.63	1429.61	1.0136	MS-GF+ Beta (v9517)	2	2.91212e-05	LGTQTFC[418]SR
0.1.15633							0	372.433	1485.7	1485.7	0.00687257	MS-GF+ Beta (v9517)	4	2.95579e-05	VDAHRC[418]IVR
0.1.19043							0	750.346	1498.68	1498.67	0.0071394	MS-GF+ Beta (v9517)	2	2.97588e-05	KC[418]TLDQAFR
0.1.21489							0	772.878	1543.74	1543.73	0.0141095	MS-GF+ Beta (v9517)	2	2.9836e-05	SIHDALC[418]VIR
0.1.22316							0	549.93	1646.77	1646.76	0.0067982	MS-GF+ Beta (v9517)	3	2.99111e-05	M[16]DC[418]LLLQHLK
0.1.23898							0	724.995	2171.96	2171.95	0.0116923	MS-GF+ Beta (v9517)	3	3.05783e-05	NLFEDQNTLTSIC[418]EK
0.1.16016							0	631.326	1260.64	1260.64	0.00189623	MS-GF+ Beta (v9517)	2	3.06588e-05	KAVVVC[418]PK
0.1.25307							0	893.42	2677.24	2677.23	0.00826819	MS-GF+ Beta (v9517)	3	3.16943e-05	DKAPGQLEC[57]ETAIAALNSC[418]LR
0.1.17615							0	641.777	1281.54	1281.53	0.00859269	MS-GF+ Beta (v9517)	2	3.21963e-05	GC[418]IPTM[16]AR
0.1.20793							0	498.874	1493.6	1493.59	0.0106708	MS-GF+ Beta (v9517)	3	3.28828e-05	QM[16]YC[418]VFNR
0.1.18339							0	754.841	1507.67	1507.66	0.00924938	MS-GF+ Beta (v9517)	2	3.31554e-05	YQGEHC[418]LLK
0.1.25357							0	786.032	2355.07	2355.07	0.00735382	MS-GF+ Beta (v9517)	3	3.32081e-05	AFC[418]EPGNVENNGVLSFIK
0.1.18286							0	665.782	1329.55	1329.55	0.00206461	MS-GF+ Beta (v9517)	2	3.41362e-05	LTEGC[418]SFR
0.1.18790							0	748.835	1495.66	1495.65	0.00417249	MS-GF+ Beta (v9517)	2	3.46351e-05	SSPSIIC[418]M[16]PK
0.1.15405							0	504.882	1511.62	1511.62	0.00551045	MS-GF+ Beta (v9517)	3	3.47059e-05	TDGC[418]HAYLSK
0.1.17274							0	970.946	3879.76	3879.74	0.021155	MS-GF+ Beta (v9517)	4	3.48518e-05	YRPENTPEPVSTSVSHYGAEPTTVSPC[418]PSSSAK
0.1.20973							0	729.647	2185.92	2185.9	0.0185784	MS-GF+ Beta (v9517)	3	3.56873e-05	EC[57]FHPYNTC[418]ITDLR
0.1.23665							0	528.922	1583.75	1583.74	0.00868084	MS-GF+ Beta (v9517)	3	3.5697e-05	LLYEALVDC[418]K
0.1.15299							0	460.895	1379.66	1379.66	0.00529385	MS-GF+ Beta (v9517)	3	3.57244e-05	TVKPSLSC[418]K
0.1.18330							0	563.267	1686.78	1686.77	0.00596585	MS-GF+ Beta (v9517)	3	3.60278e-05	IIYGGSVTGATC[418]K
0.1.16198							0	841.345	1680.67	1680.67	0.00881509	MS-GF+ Beta (v9517)	2	3.67842e-05	SFGAEEHEVC[418]R
0.1.18935							0	863.38	1724.75	1723.73	1.01855	MS-GF+ Beta (v9517)	2	3.68005e-05	NM[16]SVHLSPC[418]FR
0.1.16851							0	623.795	1245.58	1245.56	0.0126874	MS-GF+ Beta (v9517)	2	3.68953e-05	HITGLC[418]GK
0.1.22431							0	537.934	1610.78	1610.77	0.0115699	MS-GF+ Beta (v9517)	3	3.7163e-05	LLEC[418]PHLNVR
0.1.16735							0	519.576	1555.71	1555.69	0.0142269	MS-GF+ Beta (v9517)	3	3.73162e-05	TC[418]ILGTHHEK
0.1.19046							0	743.658	2227.95	2227.94	0.00714505	MS-GF+ Beta (v9517)	3	3.75386e-05	SPYTVTVGQAC[418]NPSAC[57]R
0.1.22850							0	729.338	1456.66	1456.66	0.00567477	MS-GF+ Beta (v9517)	2	3.76653e-05	M[16]GVPYC[418]IIK
0.1.19672							0	722.809	1443.6	1443.6	0.00833707	MS-GF+ Beta (v9517)	2	3.76673e-05	DTLFC[418]YHK
0.1.24960							0	722.711	2165.11	2165.09	0.0205235	MS-GF+ Beta (v9517)	3	3.7948e-05	LSQEC[418]PIKEVVLYVK
0.1.23671							0	726.362	1450.71	1450.69	0.0151904	MS-GF+ Beta (v9517)	2	3.82917e-05	TDTVLILC[418]R
0.1.16825							0	657.763	1313.51	1313.5	0.012427	MS-GF+ Beta (v9517)	2	3.84186e-05	PTC[57]PYC[418]R
0.1.19862							0	744.799	1487.58	1487.57	0.0128899	MS-GF+ Beta (v9517)	2	3.97268e-05	DSLDQFDC[418]K
0.1.23757							0	718.836	1435.66	1435.65	0.00949644	MS-GF+ Beta (v9517)	2	3.99644e-05	DLLGLC[418]EQK
0.1.20951							0	913.405	1824.79	1824.79	0.00602067	MS-GF+ Beta (v9517)	2	4.00311e-05	PM[16]C[418]IPPSYADLGK
0.1.22502							0	720.343	1438.67	1438.66	0.00873481	MS-GF+ Beta (v9517)	2	4.15713e-05	LTC[418]FELAPK
0.1.24461							0	785.714	2354.12	2353.1	1.02421	MS-GF+ Beta (v9517)	3	4.16505e-05	LGVC[418]FDVPTASVTEIQEK
0.1.12397							0	437.856	1310.54	1310.54	0.00648612	MS-GF+ Beta (v9517)	3	4.28219e-05	VSADDRC[418]K
0.1.16578							0	722.286	1442.56	1442.55	0.0124836	MS-GF+ Beta (v9517)	2	4.34754e-05	M[16]M[16]IPDC[418]QR
0.1.24324							0	703.358	1404.7	1404.69	0.0129793	MS-GF+ Beta (v9517)	2	4.38643e-05	LLC[418]GLLAER
0.1.20170							0	745.885	1489.76	1489.74	0.0138043	MS-GF+ Beta (v9517)	2	4.3923e-05	EKTC[418]PLLLR
0.1.26393							0	690.813	1379.61	1379.6	0.00667524	MS-GF+ Beta (v9517)	2	4.42786e-05	GFC[418]FITFK
0.1.14942							0	444.861	1331.56	1331.55	0.00728357	MS-GF+ Beta (v9517)	3	4.49244e-05	YPHPC[418]AAR
0.1.20472							0	683.309	1364.6	1364.6	0.0035277	MS-GF+ Beta (v9517)	2	4.52149e-05	VWNLANC[418]K
0.1.15175							0	461.843	1382.51	1382.5	0.0103953	MS-GF+ Beta (v9517)	3	4.52625e-05	NC[418]C[57]FEHR
0.1.16136							0	680.309	1358.6	1358.6	0.00321984	MS-GF+ Beta (v9517)	2	4.53927e-05	ATYDKLC[418]K
0.1.15506							0	620.765	1239.52	1239.51	0.00756361	MS-GF+ Beta (v9517)	2	4.60942e-05	LSPAM[16]GC[418]K
0.1.19968							0	788.404	1574.79	1574.78	0.0103598	MS-GF+ Beta (v9517)	2	4.66832e-05	LLKPEC[418]VLDK
0.1.18844							0	593.263	1776.77	1776.76	0.00736969	MS-GF+ Beta (v9517)	3	4.6734e-05	GDAHEC[418]FVSPVAK
0.1.17157							0	675.851	1349.69	1349.68	0.00365623	MS-GF+ Beta (v9517)	2	4.67979e-05	KIC[418]AVGITK
0.1.16644							0	351.423	1401.66	1401.65	0.00872068	MS-GF+ Beta (v9517)	4	4.71397e-05	KC[418]ILAGDHK
0.1.17318							0	467.552	1399.63	1399.63	0.00763279	MS-GF+ Beta (v9517)	3	4.73429e-05	TKFENLC[418]K
0.1.13473							0	616.304	1230.59	1230.59	0.00477904	MS-GF+ Beta (v9517)	2	4.7363e-05	LPAKC[418]PGK
0.1.17503							0	703.802	1405.59	1405.58	0.00958284	MS-GF+ Beta (v9517)	2	4.73857e-05	NSFDC[418]FKK
0.1.17138							0	768.824	1535.63	1535.63	0.00108187	MS-GF+ Beta (v9517)	2	4.8392e-05	DLC[418]NTHLM[16]R
0.1.22441							0	564.946	1691.82	1691.8	0.014634	MS-GF+ Beta (v9517)	3	4.87186e-05	NQLTSLPSAIC[418]K
0.1.18541							0	758.874	1515.73	1515.72	0.0119567	MS-GF+ Beta (v9517)	2	4.88177e-05	IVGPSGAAVPC[418]K
0.1.17593							0	672.299	1342.58	1342.58	0.00448775	MS-GF+ Beta (v9517)	2	5.0563e-05	DVHNLC[418]PK
0.1.14965							0	883.706	2648.1	2648.07	0.0267919	MS-GF+ Beta (v9517)	3	5.10891e-05	TTSSANNPNLM[16]YQDEC[418]DRR
0.1.16020							0	487.905	1460.69	1460.69	0.00418243	MS-GF+ Beta (v9517)	3	5.11192e-05	KAQC[418]PIVER
0.1.18335							0	503.562	1507.67	1507.66	0.00621486	MS-GF+ Beta (v9517)	3	5.11312e-05	YQGEHC[418]LLK
0.1.16337							0	585.743	1169.47	1169.47	0.00450655	MS-GF+ Beta (v9517)	2	5.11648e-05	M[16]AC[418]GLGGK
0.1.20304							0	749.351	1496.69	1496.68	0.00862368	MS-GF+ Beta (v9517)	2	5.12019e-05	ASC[418]LYGQLPK
0.1.19833							0	534.584	1600.73	1600.72	0.0143751	MS-GF+ Beta (v9517)	3	5.16791e-05	GEHVPGFC[418]LPK
0.1.23465							0	943.932	1885.85	1885.84	0.0075781	MS-GF+ Beta (v9517)	2	5.35738e-05	VVSC[57]LSTC[418]IFPDK
0.1.18429							0	725.368	1448.72	1448.72	0.00592958	MS-GF+ Beta (v9517)	2	5.37244e-05	LQIELGKC[418]K
0.1.16264							0	611.776	1221.54	1221.53	0.00988832	MS-GF+ Beta (v9517)	2	5.38573e-05	LSTAC[418]PGR
0.1.20768							0	602.949	1805.82	1805.81	0.016698	MS-GF+ Beta (v9517)	3	5.39549e-05	SSGC[418]DVNLPGVNVK
0.1.13529							0	773.318	1544.62	1544.61	0.00716745	MS-GF+ Beta (v9517)	2	5.47782e-05	AESHNDC[418]PVR
0.1.16941							0	1047.99	2093.98	2093.96	0.0203808	MS-GF+ Beta (v9517)	2	5.49394e-05	NYLEPGKEC[418]VQPATK
0.1.24311							0	668.837	1335.66	1335.65	0.0135802	MS-GF+ Beta (v9517)	2	5.71676e-05	VLAC[418]PFLR
0.1.19507							0	597.573	1789.7	1789.69	0.00730773	MS-GF+ Beta (v9517)	3	5.81342e-05	EYGFC[418]IM[16]DNHK
0.1.16983							0	419.848	1256.52	1256.51	0.0122763	MS-GF+ Beta (v9517)	3	5.85835e-05	FGHTFC[418]K
0.1.25443							0	782.888	1563.76	1563.75	0.00693773	MS-GF+ Beta (v9517)	2	5.90108e-05	NC[418]IISLVTQR
0.1.23115							0	740.867	1479.72	1479.71	0.00915204	MS-GF+ Beta (v9517)	2	5.93215e-05	TALLDISC[418]VK
0.1.25137							0	534.26	1599.76	1599.74	0.0145568	MS-GF+ Beta (v9517)	3	5.94661e-05	GLSSLLC[418]NFTK
0.1.17156							0	450.903	1349.69	1349.68	0.00291053	MS-GF+ Beta (v9517)	3	6.06545e-05	KIC[418]AVGITK
0.1.16097							0	674.285	1346.56	1346.55	0.00201597	MS-GF+ Beta (v9517)	2	6.09178e-05	WC[418]NEHLK
0.1.17297							0	700.827	1399.64	1399.63	0.0132918	MS-GF+ Beta (v9517)	2	6.21114e-05	TKFENLC[418]K
0.1.19264							0	666.819	1331.62	1331.62	0.00886959	MS-GF+ Beta (v9517)	2	6.3386e-05	HIAVFPC[418]K
0.1.20817							0	620.782	1239.55	1239.54	0.00860655	MS-GF+ Beta (v9517)	2	6.65652e-05	GLPFGC[418]TK
0.1.22392							0	607.287	1818.84	1818.83	0.0064954	MS-GF+ Beta (v9517)	3	6.66502e-05	GKDYYC[418]ILGIEK
0.1.18812							0	748.331	1494.65	1495.65	-1.00279	MS-GF+ Beta (v9517)	2	6.82462e-05	SSPSIIC[418]M[16]PK
0.1.16488							0	477.558	1429.65	1429.65	0.00478613	MS-GF+ Beta (v9517)	3	6.97469e-05	AHIAQLC[418]EK
0.1.11922							0	415.183	1242.53	1242.52	0.00675261	MS-GF+ Beta (v9517)	3	6.99418e-05	NM[16]KC[418]SVK
0.1.22072							0	1065.47	2128.92	2128.91	0.0119125	MS-GF+ Beta (v9517)	2	7.01212e-05	LEDEHLVFFC[418]QM[16]GK
0.1.19700							0	660.337	1318.66	1318.65	0.00654584	MS-GF+ Beta (v9517)	2	7.22819e-05	VIIVQAC[418]R
0.1.23140							0	490.56	1468.66	1468.65	0.0102474	MS-GF+ Beta (v9517)	3	7.25117e-05	NLFNVVDC[418]K
0.1.13203							0	508.566	1522.68	1522.67	0.00785854	MS-GF+ Beta (v9517)	3	7.26827e-05	KYC[418]LHGEAGK
0.1.13148							0	504.56	1510.66	1510.65	0.00343084	MS-GF+ Beta (v9517)	3	7.27789e-05	KC[418]GIQDTNSK
0.1.25389							0	953.971	1905.93	1905.91	0.0167051	MS-GF+ Beta (v9517)	2	7.43725e-05	EGTALVPYGLPC[418]IR
0.1.14035							0	478.54	1432.6	1432.59	0.0103532	MS-GF+ Beta (v9517)	3	7.46961e-05	EEHLC[418]TQR
0.1.24665							0	839.379	1676.74	1676.74	0.00726114	MS-GF+ Beta (v9517)	2	7.56168e-05	TLSFYFPPC[418]GK
0.1.18744							0	612.794	1223.57	1223.57	0.00509688	MS-GF+ Beta (v9517)	2	7.56621e-05	VSSVALC[418]K
0.1.21643							0	517.56	1549.66	1549.66	1.71026e-05	MS-GF+ Beta (v9517)	3	7.76746e-05	VELC[418]SFSGYK
0.1.19188							0	516.93	1547.77	1547.76	0.00891915	MS-GF+ Beta (v9517)	3	7.98843e-05	RC[418]AVGLVDAVK
0.1.20746							0	671.344	1340.67	1340.66	0.0112039	MS-GF+ Beta (v9517)	2	8.20975e-05	AVLC[418]PPPVK
0.1.20659							0	447.896	1340.67	1340.66	0.00395799	MS-GF+ Beta (v9517)	3	8.30642e-05	AVLC[418]PPPVK
0.1.24534							0	631.652	1891.93	1891.92	0.0156071	MS-GF+ Beta (v9517)	3	8.41252e-05	IIC[418]SAGLSLLAEER
0.1.11750							0	411.518	1231.53	1231.52	0.00998873	MS-GF+ Beta (v9517)	3	8.48377e-05	VVNSC[418]HR
0.1.11811							0	616.772	1231.53	1231.52	0.00710285	MS-GF+ Beta (v9517)	2	8.55519e-05	VVNSC[418]HR
0.1.17720							0	635.337	1902.99	1902.97	0.0193285	MS-GF+ Beta (v9517)	3	8.73378e-05	RVC[418]EEIAIIPSKK
0.1.13901							0	790.322	1578.63	1578.62	0.0108434	MS-GF+ Beta (v9517)	2	8.75162e-05	GNSPPSSGEAC[418]R
0.1.24385							0	737.879	1473.74	1473.74	0.00750114	MS-GF+ Beta (v9517)	2	8.81844e-05	LVPC[418]ILEAAK
0.1.22222							0	665.641	1993.9	1991.89	2.01472	MS-GF+ Beta (v9517)	3	8.82363e-05	FISDIANDALQHC[418]K
0.1.20618							0	737.316	1472.62	1472.62	0.000806075	MS-GF+ Beta (v9517)	2	8.88978e-05	TM[16]C[418]PLLSM[16]K
0.1.16106							0	519.549	1555.63	1555.63	0.000685835	MS-GF+ Beta (v9517)	3	8.8969e-05	ATHVAFDC[418]M[16]K
0.1.13700							0	559.913	1676.72	1676.7	0.0138952	MS-GF+ Beta (v9517)	3	9.06601e-05	HVLTGSADNSC[418]R
0.1.21722							0	623.824	1245.63	1245.62	0.00840073	MS-GF+ Beta (v9517)	2	9.17309e-05	VLC[418]PVIGK
0.1.15825							0	810.856	1619.7	1619.69	0.00875254	MS-GF+ Beta (v9517)	2	9.223e-05	HC[418]NM[16]VLENVK
0.1.18678							0	737.351	1472.69	1472.68	0.00728091	MS-GF+ Beta (v9517)	2	9.23073e-05	LLLC[418]EHAEK
0.1.21838							0	623.826	1245.64	1245.62	0.0124291	MS-GF+ Beta (v9517)	2	9.2652e-05	VLC[418]PVIGK
0.1.13427							0	411.205	1230.59	1230.59	0.00281263	MS-GF+ Beta (v9517)	3	9.52822e-05	LPAKC[418]PGK
0.1.18779							0	614.946	1841.82	1841.81	0.00900762	MS-GF+ Beta (v9517)	3	9.70872e-05	SQIC[418]DNAALYAQK
0.1.20679							0	689.85	1377.69	1377.68	0.00678848	MS-GF+ Beta (v9517)	2	9.90891e-05	TVLIAC[418]NVK
0.1.20254							0	537.935	1610.78	1610.77	0.0141334	MS-GF+ Beta (v9517)	3	0.000100024	LLEC[418]PHLNVR
0.1.21293							0	688.666	2062.98	2062.96	0.015192	MS-GF+ Beta (v9517)	3	0.00010048	IQSGHSLEGC[418]FQVIK
0.1.21308							0	579.294	1734.86	1734.84	0.0179671	MS-GF+ Beta (v9517)	3	0.000100515	EKDC[418]ALTVVALR
0.1.15124							0	481.559	1441.65	1441.64	0.0142966	MS-GF+ Beta (v9517)	3	0.000100657	KC[418]LSVM[16]EAK
0.1.19397							0	480.548	1438.62	1438.61	0.00934315	MS-GF+ Beta (v9517)	3	0.000102225	IGNC[418]PFSQR
0.1.16826							0	607.261	1212.51	1212.49	0.0121899	MS-GF+ Beta (v9517)	2	0.00010285	VPC[418]AYDK
0.1.16317							0	441.888	1322.64	1322.64	0.00634131	MS-GF+ Beta (v9517)	3	0.00010336	IKC[418]LATEK
0.1.13996							0	814.357	1626.7	1626.7	0.00330509	MS-GF+ Beta (v9517)	2	0.00010346	QM[16]TGKC[418]ELQR
0.1.19125							0	592.607	1774.8	1774.78	0.0143303	MS-GF+ Beta (v9517)	3	0.000104262	HPVSALM[16]EIC[418]NK
0.1.13877							0	440.869	1319.58	1319.58	0.00986636	MS-GF+ Beta (v9517)	3	0.000105162	TLHSC[418]SVR
0.1.13396							0	616.594	1846.76	1845.77	0.994087	MS-GF+ Beta (v9517)	3	0.000106465	YHTVNGHNC[418]EVR
0.1.16637							0	810.02	2427.04	2426.03	1.01151	MS-GF+ Beta (v9517)	3	0.000108475	AGSSGNSC[418]ITYQPSVSGEHK
0.1.18671							0	766.844	1531.67	1531.67	0.00424158	MS-GF+ Beta (v9517)	2	0.000108991	ALEFAPAC[418]HR
0.1.14364							0	729.769	1457.52	1457.52	0.00293587	MS-GF+ Beta (v9517)	2	0.00010997	NM[16]M[16]AAC[418]DPR
0.1.14750							0	533.894	1598.66	1598.65	0.0137152	MS-GF+ Beta (v9517)	3	0.000110173	M[16]M[16]IPDC[418]QRR
0.1.17469							0	668.311	1334.61	1334.6	0.00688194	MS-GF+ Beta (v9517)	2	0.000111274	LSQEC[418]PIK
0.1.17581							0	668.309	1334.6	1334.6	0.00358605	MS-GF+ Beta (v9517)	2	0.000112087	LSQEC[418]PIK
0.1.25238							0	865.926	1729.84	1728.83	1.00462	MS-GF+ Beta (v9517)	2	0.000113183	GDGPIC[418]LVLAPTR
0.1.16103							0	449.859	1346.56	1346.55	0.00148389	MS-GF+ Beta (v9517)	3	0.000114314	WC[418]NEHLK
0.1.18711							0	526.587	1576.74	1575.73	1.01065	MS-GF+ Beta (v9517)	3	0.000116656	NREC[418]LLSAPR
0.1.25312							0	772.122	3084.46	3084.44	0.0224679	MS-GF+ Beta (v9517)	4	0.000116841	LTTPTYGDLNHLVSATM[16]SGVTTC[418]LR
0.1.16075							0	650.297	1298.58	1298.58	0.000789638	MS-GF+ Beta (v9517)	2	0.000117214	GKVC[418]FEAK
0.1.21707							0	619.792	1237.57	1237.56	0.00789064	MS-GF+ Beta (v9517)	2	0.000118608	ITVAWC[418]K
0.1.16714							0	731.378	1460.74	1460.73	0.0142274	MS-GF+ Beta (v9517)	2	0.000122247	QVLIRPC[418]SK
0.1.24678							0	949.425	1896.83	1896.82	0.013819	MS-GF+ Beta (v9517)	2	0.000124162	LFLPC[418]PM[16]DVEGSR
0.1.19865							0	645.806	1289.6	1289.59	0.00685837	MS-GF+ Beta (v9517)	2	0.000126497	LEVVPGC[418]R
0.1.25067							0	768.362	1534.71	1534.71	0.0032246	MS-GF+ Beta (v9517)	2	0.000127951	EGLLLWC[418]QR
0.1.21514							0	810.4	1618.78	1618.77	0.0113753	MS-GF+ Beta (v9517)	2	0.000128682	VC[418]EEIAIIPSK
0.1.14914							0	446.56	1336.66	1336.65	0.00494295	MS-GF+ Beta (v9517)	3	0.000129451	LIEKC[418]VSK
0.1.21487							0	728.343	2182.01	2183.03	-1.01944	MS-GF+ Beta (v9517)	3	0.000131623	EIVHLQAGQC[418]GNQIGAK
0.1.17286							0	685.821	1369.63	1369.62	0.0115274	MS-GF+ Beta (v9517)	2	0.000134115	AKFENLC[418]K
0.1.21154							0	531.279	1590.82	1590.8	0.015365	MS-GF+ Beta (v9517)	3	0.000134576	QKC[418]LAALASLR
0.1.11765							0	638.769	1275.52	1275.51	0.0100715	MS-GF+ Beta (v9517)	2	0.000139062	VEC[418]QSHR
0.1.11785							0	426.181	1275.52	1275.51	0.00987506	MS-GF+ Beta (v9517)	3	0.00013923	VEC[418]QSHR
0.1.21404							0	605.294	1208.57	1208.57	0.00110599	MS-GF+ Beta (v9517)	2	0.000151654	VVFC[418]PVK
0.1.16071							0	644.784	1287.55	1287.55	0.00444767	MS-GF+ Beta (v9517)	2	0.000157383	HC[418]DLQVR
0.1.16715							0	662.289	1322.56	1322.55	0.00897398	MS-GF+ Beta (v9517)	2	0.000158451	ITEFC[418]HR
0.1.22298							0	483.241	1446.7	1446.69	0.00982538	MS-GF+ Beta (v9517)	3	0.000158976	LFQC[418]LLHR
0.1.25006							0	647.823	1293.63	1293.62	0.00656968	MS-GF+ Beta (v9517)	2	0.000160699	GIFPVLC[418]K
0.1.19097							0	772.035	2313.08	2313.08	0.00552253	MS-GF+ Beta (v9517)	3	0.000162777	NTNPNFVRC[418]IIPNHEK
0.1.15614							0	496.242	1485.71	1485.7	0.00816759	MS-GF+ Beta (v9517)	3	0.000167117	VDAHRC[418]IVR
0.1.17081							0	765.87	1529.73	1529.71	0.0137684	MS-GF+ Beta (v9517)	2	0.00016798	AAQHGVC[418]SVLK
0.1.21412							0	706.806	1411.6	1411.6	-0.00342617	MS-GF+ Beta (v9517)	2	0.000171211	GDFC[418]IQVGR
0.1.17990							0	667.309	1332.6	1332.6	0.00873514	MS-GF+ Beta (v9517)	2	0.000171234	AQC[418]PIVER
0.1.19725							0	794.37	1586.73	1586.71	0.0145273	MS-GF+ Beta (v9517)	2	0.000172481	IISDNLTYC[418]K
0.1.14122							0	743.324	1484.63	1484.62	0.0151076	MS-GF+ Beta (v9517)	2	0.000173071	NKGNEC[418]FQK
0.1.13927							0	501.566	1501.68	1501.67	0.00709426	MS-GF+ Beta (v9517)	3	0.000173756	KDGVC[418]GPPPSK
0.1.20246							0	934.924	1867.83	1867.83	0.00698725	MS-GF+ Beta (v9517)	2	0.000175006	APPC[418]EYKDWLTK
0.1.25536							0	589.615	1765.82	1765.82	0.00746786	MS-GF+ Beta (v9517)	3	0.000175252	LPADTC[418]LLEFAR
0.1.15653							0	958.46	1914.91	1913.89	1.01736	MS-GF+ Beta (v9517)	2	0.000178124	AIPQVKC[418]NEQPNR
0.1.19961							0	563.285	1686.83	1686.82	0.01218	MS-GF+ Beta (v9517)	3	0.000182368	LC[418]SGVLGTVVHGK
0.1.23531							0	638.301	1274.59	1274.58	0.00518974	MS-GF+ Beta (v9517)	2	0.000184068	VLFTC[418]FK
0.1.19917							0	525.938	1574.79	1574.78	0.00955304	MS-GF+ Beta (v9517)	3	0.000186958	LLKPEC[418]VLDK
0.1.13479							0	521.573	1561.7	1561.69	0.00458598	MS-GF+ Beta (v9517)	3	0.000187326	RPAEIYHC[418]R
0.1.21403							0	710.357	2128.05	2128.04	0.00388188	MS-GF+ Beta (v9517)	3	0.000187549	TQAIVC[418]QQLDLTHLK
0.1.14043							0	713.333	1424.65	1424.64	0.00789981	MS-GF+ Beta (v9517)	2	0.000193119	KVC[418]STNDLK
0.1.22081							0	429.85	1286.53	1286.52	0.00619773	MS-GF+ Beta (v9517)	3	0.000196605	FC[418]PFAER
0.1.22187							0	429.85	1286.53	1286.52	0.00738791	MS-GF+ Beta (v9517)	3	0.000198737	FC[418]PFAER
0.1.22317							0	644.271	1286.53	1286.52	0.00642463	MS-GF+ Beta (v9517)	2	0.000202205	FC[418]PFAER
0.1.22453							0	644.273	1286.53	1286.52	0.0109412	MS-GF+ Beta (v9517)	2	0.000203054	FC[418]PFAER
0.1.25297							0	796.405	1590.79	1590.78	0.0162996	MS-GF+ Beta (v9517)	2	0.000205304	EAC[418]GVIVELIK
0.1.17765							0	705.819	1409.62	1409.61	0.00921364	MS-GF+ Beta (v9517)	2	0.000207347	ASLAC[418]GPM[16]VK
0.1.14017							0	673.266	1344.52	1344.51	0.0094681	MS-GF+ Beta (v9517)	2	0.000214396	AC[418]VM[16]M[16]QGR
0.1.14051							0	717.305	1432.6	1432.59	0.0090542	MS-GF+ Beta (v9517)	2	0.000217206	EEHLC[418]TQR
0.1.15823							0	611.268	1220.52	1220.51	0.0100313	MS-GF+ Beta (v9517)	2	0.000217348	TFC[418]PAHK
0.1.13312							0	611.605	1831.79	1831.78	0.0158964	MS-GF+ Beta (v9517)	3	0.000217632	NTHC[418]SSLPHYQK
0.1.15742							0	570.749	1139.48	1139.47	0.00964179	MS-GF+ Beta (v9517)	2	0.000218448	SC[418]AGISGK
0.1.21560							0	757.373	2269.1	2269.09	0.0112766	MS-GF+ Beta (v9517)	3	0.000220234	SIEIPRPVDGVEVPGC[418]GK
0.1.21836							0	581.257	1740.75	1740.73	0.0147606	MS-GF+ Beta (v9517)	3	0.000220522	DRNC[418]LDPFTSR
0.1.21261							0	611.787	1221.56	1221.55	0.00707507	MS-GF+ Beta (v9517)	2	0.000221617	GLGDC[418]LVK
0.1.14937							0	411.185	1230.53	1230.53	0.00593961	MS-GF+ Beta (v9517)	3	0.000224342	AIC[418]DHVR
0.1.12837							0	563.727	1125.44	1125.43	0.00625452	MS-GF+ Beta (v9517)	2	0.000224645	NASC[418]GTR
0.1.23899							0	664.296	1326.58	1326.57	0.00453224	MS-GF+ Beta (v9517)	2	0.00022591	NC[418]IGDFLK
0.1.26955							0	668.7	2003.08	2003.06	0.0143203	MS-GF+ Beta (v9517)	3	0.000230463	IVFVPGC[418]SIPLTIVK
0.1.21888							0	684.816	1367.62	1367.6	0.013919	MS-GF+ Beta (v9517)	2	0.000234165	SC[57]NC[418]LLLK
0.1.25322							0	816.935	1631.85	1631.84	0.0131795	MS-GF+ Beta (v9517)	2	0.000237848	LLSLLPLSC[418]QK
0.1.16651							0	943.437	1884.86	1884.84	0.0191372	MS-GF+ Beta (v9517)	2	0.000240007	VC[418]HAHPTLSEAFR
0.1.19498							0	592.633	1774.88	1774.87	0.00290232	MS-GF+ Beta (v9517)	3	0.000240775	RVC[418]EEIAIIPSK
0.1.19848							0	639.31	1276.61	1276.59	0.0110185	MS-GF+ Beta (v9517)	2	0.000240847	QLPSLAC[418]K
0.1.24289							0	669.833	1337.65	1335.65	2.00455	MS-GF+ Beta (v9517)	2	0.000241173	VLAC[418]PFLR
0.1.22548							0	708.315	1414.62	1414.6	0.0104636	MS-GF+ Beta (v9517)	2	0.000241415	VQFC[418]PFEK
0.1.17022							0	752.018	2253.03	2253.01	0.0233675	MS-GF+ Beta (v9517)	3	0.00024219	PGPPTPAAAHSIPYNSC[418]R
0.1.17131							0	512.885	1535.63	1535.63	0.000153059	MS-GF+ Beta (v9517)	3	0.000242462	DLC[418]NTHLM[16]R
0.1.21399							0	646.825	1291.64	1291.63	0.00475248	MS-GF+ Beta (v9517)	2	0.000249046	SIPIC[418]TLK
0.1.23835							0	574.644	1720.91	1720.9	0.00638395	MS-GF+ Beta (v9517)	3	0.000257312	SLLKPFC[418]AALLK
0.1.11136							0	634.258	1266.5	1266.49	0.0112715	MS-GF+ Beta (v9517)	2	0.000258368	YGQNC[418]HK
0.1.15699							0	806.338	1610.66	1610.65	0.0111235	MS-GF+ Beta (v9517)	2	0.000259362	KENQWC[418]EEK
0.1.20572							0	493.239	1476.69	1476.69	0.00948143	MS-GF+ Beta (v9517)	3	0.000259962	GC[418]GTVLLSGPR
0.1.16559							0	485.23	1452.67	1452.65	0.0142868	MS-GF+ Beta (v9517)	3	0.000260997	GTLITHC[418]YK
0.1.18847							0	653.323	1304.63	1304.63	0.00608554	MS-GF+ Beta (v9517)	2	0.000263924	VC[418]NPIITK
0.1.13284							0	606.75	1211.48	1211.48	0.00749167	MS-GF+ Beta (v9517)	2	0.000268893	M[16]C[418]PATQK
0.1.19393							0	407.187	1218.54	1218.53	0.00667761	MS-GF+ Beta (v9517)	3	0.000269255	LPFC[418]GHK
0.1.13665							0	416.85	1247.53	1247.52	0.0104354	MS-GF+ Beta (v9517)	3	0.00026956	SC[418]HTGLGR
0.1.24340							0	658.286	1314.56	1314.55	0.00478759	MS-GF+ Beta (v9517)	2	0.00027004	FIDPFC[418]R
0.1.23017							0	781.855	1561.69	1561.69	0.00416665	MS-GF+ Beta (v9517)	2	0.000272964	ALC[418]DPLEEVR
0.1.19838							0	722.329	1442.64	1442.63	0.0113844	MS-GF+ Beta (v9517)	2	0.00027348	NNLASC[418]YLK
0.1.13281							0	645.283	1288.55	1288.54	0.00639108	MS-GF+ Beta (v9517)	2	0.000275193	HQSLQC[418]R
0.1.23990							0	644.286	1286.56	1286.55	0.0104473	MS-GF+ Beta (v9517)	2	0.000275761	FIDPFC[418]K
0.1.21173							0	622.27	1242.53	1242.52	0.00906861	MS-GF+ Beta (v9517)	2	0.000276142	TDAC[418]FIR
0.1.18492							0	685.803	1369.59	1369.58	0.00926377	MS-GF+ Beta (v9517)	2	0.000276885	LTDC[418]VVM[16]R
0.1.22517							0	856.889	1711.76	1711.75	0.0104833	MS-GF+ Beta (v9517)	2	0.000278954	QGFGNLPIC[418]M[16]AK
0.1.19751							0	564.264	1689.77	1689.75	0.0168095	MS-GF+ Beta (v9517)	3	0.000279194	EYKC[418]GDLVFAK
0.1.16277							0	391.187	1170.54	1170.53	0.00786779	MS-GF+ Beta (v9517)	3	0.000279711	HLPGVC[418]K
0.1.21783							0	892.4	1782.78	1782.77	0.0142133	MS-GF+ Beta (v9517)	2	0.000280863	NQSFC[418]PTVNLDK
0.1.15428							0	756.818	1511.62	1511.62	0.00421147	MS-GF+ Beta (v9517)	2	0.000282438	TDGC[418]HAYLSK
0.1.20258							0	649.791	1297.57	1297.56	0.00934991	MS-GF+ Beta (v9517)	2	0.000283342	VLEFNC[418]R
0.1.18945							0	673.275	1344.54	1344.53	0.00599735	MS-GF+ Beta (v9517)	2	0.00029461	M[16]PEC[418]YIR
0.1.20214							0	724.862	1447.71	1447.7	0.0137574	MS-GF+ Beta (v9517)	2	0.000296392	LIIVEGC[418]QR
0.1.19063							0	660.315	1318.61	1318.6	0.00973114	MS-GF+ Beta (v9517)	2	0.000297294	LIPDGC[418]GVK
0.1.10523							0	394.838	1181.49	1181.48	0.00867686	MS-GF+ Beta (v9517)	3	0.000297659	AAEDKC[418]K
0.1.14832							0	1193.51	2385.01	2384.99	0.0159069	MS-GF+ Beta (v9517)	2	0.000298033	TYPGVM[16]HSSC[418]PQEM[16]AAVK
0.1.10609							0	591.753	1181.49	1181.48	0.0077441	MS-GF+ Beta (v9517)	2	0.000299177	AAEDKC[418]K
0.1.22304							0	541.605	1621.79	1621.78	0.00760405	MS-GF+ Beta (v9517)	3	0.000299638	ETIAKC[418]IADLK
0.1.14044							0	630.784	1259.55	1259.54	0.0113281	MS-GF+ Beta (v9517)	2	0.000305051	AALEAC[418]HK
0.1.10640							0	394.837	1181.49	1181.48	0.00373301	MS-GF+ Beta (v9517)	3	0.000308465	AAEDKC[418]K
0.1.21257							0	628.786	1255.56	1255.55	0.00990483	MS-GF+ Beta (v9517)	2	0.000311955	TAQC[418]FLR
0.1.15819							0	676.794	1351.57	1351.56	0.00952183	MS-GF+ Beta (v9517)	2	0.000314871	TVGVQGDC[418]R
0.1.14866							0	665.261	1328.51	1328.49	0.0128778	MS-GF+ Beta (v9517)	2	0.000315851	DANC[418]SVM[16]R
0.1.19900							0	641.787	1281.56	1281.55	0.0081737	MS-GF+ Beta (v9517)	2	0.000341253	LC[418]PFQEK
0.1.21074							0	632.819	1263.62	1263.61	0.012246	MS-GF+ Beta (v9517)	2	0.000344523	LLAC[418]IASR
0.1.20733							0	737.319	1472.62	1472.62	0.00532268	MS-GF+ Beta (v9517)	2	0.000352316	TM[16]C[418]PLLSM[16]K
0.1.21769							0	729.986	2186.94	2186.92	0.0179665	MS-GF+ Beta (v9517)	3	0.000355543	YNFHGTAEQDLPFC[418]K
0.1.13852							0	493.231	1476.67	1476.66	0.0108298	MS-GF+ Beta (v9517)	3	0.00035734	RVC[418]TNPVDR
0.1.21539							0	886.492	1770.97	1770.95	0.0163678	MS-GF+ Beta (v9517)	2	0.000357518	LVVVLC[418]NLKPQK
0.1.12054							0	639.721	1277.43	1277.42	0.00846584	MS-GF+ Beta (v9517)	2	0.000360011	M[16]SC[418]M[16]DNK
0.1.20690							0	899.413	1796.81	1797.81	-0.99486	MS-GF+ Beta (v9517)	2	0.000364181	LSC[418]FAQTVSPAEK
0.1.14482							0	406.192	1215.55	1215.54	0.0113704	MS-GF+ Beta (v9517)	3	0.000370357	YKC[418]GISK
0.1.11104							0	423.175	1266.5	1266.49	0.0113803	MS-GF+ Beta (v9517)	3	0.000389744	YGQNC[418]HK
0.1.19922							0	481.883	1442.63	1442.62	0.00506229	MS-GF+ Beta (v9517)	3	0.000391681	RFC[418]PFAER
0.1.16677							0	481.859	1442.56	1442.55	0.0112801	MS-GF+ Beta (v9517)	3	0.000402352	M[16]M[16]IPDC[418]QR
0.1.21536							0	471.894	1412.66	1412.65	0.0142703	MS-GF+ Beta (v9517)	3	0.00040271	EKLC[418]FLDK
0.1.11970							0	433.859	1298.56	1298.55	0.00998732	MS-GF+ Beta (v9517)	3	0.000403794	LKDC[418]M[16]QK
0.1.20229							0	1135.55	2269.08	2269.06	0.0228118	MS-GF+ Beta (v9517)	2	0.000409764	AGKPVIC[418]ATQM[16]LESM[16]IK
0.1.21472							0	775.903	1549.79	1549.78	0.0120868	MS-GF+ Beta (v9517)	2	0.000416372	KC[418]PFIVALNK
0.1.14523							0	486.851	1457.53	1457.52	0.0120473	MS-GF+ Beta (v9517)	3	0.000434541	NM[16]M[16]AAC[418]DPR
0.1.12433							0	425.176	1272.51	1272.5	0.00493548	MS-GF+ Beta (v9517)	3	0.000446639	GDYNKC[418]R
0.1.13091							0	711.837	1421.66	1421.65	0.00438871	MS-GF+ Beta (v9517)	2	0.000453062	AANTQKC[418]IR
0.1.20078							0	644.271	1286.53	1286.52	0.005326	MS-GF+ Beta (v9517)	2	0.000455675	FC[418]PFAER
0.1.17159							0	459.889	1376.65	1376.65	-0.00147679	MS-GF+ Beta (v9517)	3	0.000460462	ELC[418]ELKPK
0.1.15762							0	407.848	1220.52	1220.51	0.0100791	MS-GF+ Beta (v9517)	3	0.000463849	TFC[418]PAHK
0.1.17285							0	415.866	1244.58	1244.57	0.00859446	MS-GF+ Beta (v9517)	3	0.000468193	IHDVLC[418]K
0.1.18359							0	590.781	1179.55	1179.54	0.00494444	MS-GF+ Beta (v9517)	2	0.000493552	LNVC[418]VSK
0.1.24963							0	432.218	1293.63	1293.62	0.00695312	MS-GF+ Beta (v9517)	3	0.00050453	GIFPVLC[418]K
0.1.15811							0	688.302	1374.59	1374.58	0.0115374	MS-GF+ Beta (v9517)	2	0.000518652	GKVC[418]FEM[16]K
0.1.16299							0	527.262	1578.76	1578.75	0.0106157	MS-GF+ Beta (v9517)	3	0.000526041	GKDC[418]AVIVTQK
0.1.16621							0	426.205	1275.59	1275.59	0.00851518	MS-GF+ Beta (v9517)	3	0.000527459	DIRPVC[418]R
0.1.15822							0	540.908	1619.7	1619.69	0.0136831	MS-GF+ Beta (v9517)	3	0.000527695	HC[418]NM[16]VLENVK
0.1.21712							0	747.854	1493.69	1492.68	1.0133	MS-GF+ Beta (v9517)	2	0.000531179	DISVQAIAC[418]R
0.1.13917							0	660.8	1319.59	1319.58	0.0107036	MS-GF+ Beta (v9517)	2	0.000541334	TLHSC[418]SVR
0.1.22104							0	644.272	1286.53	1286.52	0.00801155	MS-GF+ Beta (v9517)	2	0.000546493	FC[418]PFAER
0.1.19276							0	583.301	1746.88	1746.87	0.0127735	MS-GF+ Beta (v9517)	3	0.000551533	VC[418]EEIAIIPSKK
0.1.15453							0	830.829	1659.64	1659.64	0.0076238	MS-GF+ Beta (v9517)	2	0.000552821	SLETC[418]M[16]YDHK
0.1.15071							0	445.519	1333.53	1333.53	0.00838524	MS-GF+ Beta (v9517)	3	0.000558578	M[16]TDKC[418]FR
0.1.21193							0	665.305	1328.59	1328.59	0.00536167	MS-GF+ Beta (v9517)	2	0.00055913	NC[418]SSFLIK
0.1.17125							0	665.305	1328.59	1328.59	0.00536167	MS-GF+ Beta (v9517)	2	0.000566148	KC[418]YLEQK
0.1.15836							0	581.765	1161.52	1161.51	0.0100216	MS-GF+ Beta (v9517)	2	0.000576848	LGQAC[418]PR
0.1.13688							0	624.771	1247.53	1247.52	0.0090144	MS-GF+ Beta (v9517)	2	0.000577798	SC[418]HTGLGR
0.1.9293							0	592.254	1182.49	1182.49	0.00309279	MS-GF+ Beta (v9517)	2	0.000580746	KC[418]SASNR
0.1.16387							0	567.76	1133.51	1133.5	0.00640398	MS-GF+ Beta (v9517)	2	0.000593215	APQC[418]LGK
0.1.16503							0	567.76	1133.51	1133.5	0.00615984	MS-GF+ Beta (v9517)	2	0.00059338	APQC[418]LGK
0.1.16224							0	405.519	1213.53	1213.53	0.00883195	MS-GF+ Beta (v9517)	3	0.000596201	YIQAAC[418]K
0.1.18742							0	653.323	1304.63	1304.63	0.00486484	MS-GF+ Beta (v9517)	2	0.000597335	VC[418]NPIITK
0.1.26195							0	669.674	2006	2005.99	0.0158258	MS-GF+ Beta (v9517)	3	0.000601201	KNILEESLC[418]ELVAK
0.1.9393							0	592.254	1182.49	1182.49	0.00297072	MS-GF+ Beta (v9517)	2	0.000607066	KC[418]SASNR
0.1.18383							0	583.263	1164.51	1164.51	0.00535107	MS-GF+ Beta (v9517)	2	0.00061087	AAC[418]DLVR
0.1.16214							0	589.775	1177.53	1177.53	0.00863161	MS-GF+ Beta (v9517)	2	0.000614963	TIAPC[418]QK
0.1.9282							0	395.171	1182.49	1182.49	0.0014926	MS-GF+ Beta (v9517)	3	0.000645587	KC[418]SASNR
0.1.15729							0	430.878	1289.61	1289.6	0.0121522	MS-GF+ Beta (v9517)	3	0.000647571	EIRPVC[418]R
0.1.9079							0	427.872	1280.59	1280.59	0.00366992	MS-GF+ Beta (v9517)	3	0.000656113	IKC[418]DKEK
0.1.22381							0	641.291	1280.57	1280.57	1.78492e-06	MS-GF+ Beta (v9517)	2	0.000660689	PIIFDC[418]R
0.1.14673							0	648.777	1295.54	1295.53	0.0116917	MS-GF+ Beta (v9517)	2	0.000660901	EALNSC[418]NK
0.1.13321							0	759.82	1517.63	1517.61	0.0114718	MS-GF+ Beta (v9517)	2	0.000663893	GNHEC[418]ASINR
0.1.16095							0	595.244	1188.47	1188.47	0.00450513	MS-GF+ Beta (v9517)	2	0.000670143	SC[418]GYSVR
0.1.14854							0	509.201	1524.58	1524.56	0.0159797	MS-GF+ Beta (v9517)	3	0.000675617	HEEFEEGC[418]K
0.1.13971							0	582.749	1163.48	1163.47	0.00927558	MS-GF+ Beta (v9517)	2	0.000684449	TPC[418]PNSK
0.1.15524							0	393.541	1177.6	1177.6	0.00326065	MS-GF+ Beta (v9517)	3	0.000685774	VAVKC[418]IK
0.1.14452							0	583.757	1165.5	1165.49	0.0107154	MS-GF+ Beta (v9517)	2	0.000805765	ISSNC[418]PK
0.1.21664							0	550.592	1648.76	1648.74	0.0174157	MS-GF+ Beta (v9517)	3	0.000824117	EFHGLGDC[418]IIK
0.1.13313							0	458.954	1831.79	1831.78	0.0112444	MS-GF+ Beta (v9517)	4	0.00083911	NTHC[418]SSLPHYQK
0.1.23010							0	607.277	1212.54	1212.53	0.00778684	MS-GF+ Beta (v9517)	2	0.000893345	IGLDFC[418]K
0.1.14282							0	722.82	1443.62	1443.63	-0.00278545	MS-GF+ Beta (v9517)	2	0.000914028	LKESYC[418]QR
0.1.21689							0	825.38	1648.75	1648.74	0.00802957	MS-GF+ Beta (v9517)	2	0.000925186	EFHGLGDC[418]IIK
0.1.19921							0	773.336	1544.66	1544.65	0.0116091	MS-GF+ Beta (v9517)	2	0.000964162	VELPTC[418]M[16]YR
0.1.21594							0	867.38	1732.75	1732.73	0.0127654	MS-GF+ Beta (v9517)	2	0.000967306	PM[16]EVFM[16]C[418]SVLK
0.1.11728							0	417.19	1248.55	1248.54	0.00938249	MS-GF+ Beta (v9517)	3	0.000978584	SKPC[418]GSPR
0.1.11665							0	370.843	1109.51	1109.5	0.0074283	MS-GF+ Beta (v9517)	3	0.00128122	KVC[418]ASGK
0.1.11652							0	555.762	1109.51	1109.5	0.00957781	MS-GF+ Beta (v9517)	2	0.00128359	KVC[418]ASGK
0.1.22887							0	486.559	1456.66	1456.66	0.000381942	MS-GF+ Beta (v9517)	3	0.00129211	M[16]GVPYC[418]IIK
0.1.13599							0	436.877	1307.61	1307.6	0.00806019	MS-GF+ Beta (v9517)	3	0.00144138	KGQEVC[418]VK
0.1.17601							0	448.534	1342.58	1342.58	0.000690284	MS-GF+ Beta (v9517)	3	0.00146324	DVHNLC[418]PK
0.1.13727							0	633.777	1265.54	1265.53	0.0113892	MS-GF+ Beta (v9517)	2	0.00155936	AVAAGNSC[418]R
0.1.13149							0	419.55	1255.63	1255.62	0.00801287	MS-GF+ Beta (v9517)	3	0.00160741	LKPC[418]HLK
0.1.16118							0	470.227	1407.66	1407.65	0.00500813	MS-GF+ Beta (v9517)	3	0.00166572	KC[418]LEELQK
0.1.19006							0	560.273	1118.53	1118.53	0.006064	MS-GF+ Beta (v9517)	2	0.00179694	LPC[418]VAAK
0.1.18901							0	560.273	1118.53	1118.53	0.00618607	MS-GF+ Beta (v9517)	2	0.00187054	LPC[418]VAAK
0.1.11863							0	578.913	1733.72	1733.71	0.00458037	MS-GF+ Beta (v9517)	3	0.0018773	TQEQC[418]VHNETK
0.1.15042							0	568.758	1135.5	1135.49	0.0110232	MS-GF+ Beta (v9517)	2	0.00194621	AAVAAGC[418]R
0.1.21144							0	492.575	1474.7	1474.69	0.00898206	MS-GF+ Beta (v9517)	3	0.0019475	QELGIC[418]PAVK
0.1.18699							0	788.872	1575.73	1575.73	0.000473636	MS-GF+ Beta (v9517)	2	0.00198729	NREC[418]LLSAPR
0.1.21686							0	491.551	1471.63	1471.62	0.00826809	MS-GF+ Beta (v9517)	3	0.00198854	ETGAASFLC[418]R
0.1.13502							0	408.166	1221.48	1221.47	0.00620217	MS-GF+ Beta (v9517)	3	0.00199993	VPDHHPC[418]
0.1.16749							0	426.206	1275.6	1275.59	0.0119942	MS-GF+ Beta (v9517)	3	0.00201017	DIRPVC[418]R
0.1.13966							0	628.26	1254.51	1254.49	0.0118069	MS-GF+ Beta (v9517)	2	0.00204353	NM[16]AC[418]VQR
0.1.22084							0	627.809	1253.6	1253.59	0.00881707	MS-GF+ Beta (v9517)	2	0.00204999	FIVC[418]LNK
0.1.21518							0	621.276	1240.54	1240.53	0.0109191	MS-GF+ Beta (v9517)	2	0.00206142	TC[418]PFLDK
0.1.18950							0	590.27	1178.52	1178.52	0.00349495	MS-GF+ Beta (v9517)	2	0.00206414	EVAALC[418]R
0.1.17488							0	672.274	1342.53	1342.53	0.004968	MS-GF+ Beta (v9517)	2	0.00207162	M[16]QLVC[57]C[418]R
0.1.14209							0	444.194	1329.56	1329.55	0.0116033	MS-GF+ Beta (v9517)	3	0.0020975	TKFEEC[418]R
0.1.13247							0	648.776	1295.54	1295.53	0.00949439	MS-GF+ Beta (v9517)	2	0.00210636	IQQDSGC[418]K
0.1.16044							0	421.219	1260.64	1260.64	-0.00019225	MS-GF+ Beta (v9517)	3	0.00211703	KAVVVC[418]PK
0.1.18576							0	604.785	1207.56	1207.55	0.00856206	MS-GF+ Beta (v9517)	2	0.00212734	GTAVAIC[418]R
0.1.18645							0	1010.97	2019.92	2019.92	0.00418175	MS-GF+ Beta (v9517)	2	0.00212793	TTHYTPLAC[418]GSNPLK
0.1.22589							0	472.545	1414.61	1414.6	0.00959578	MS-GF+ Beta (v9517)	3	0.00222018	VQFC[418]PFEK
0.1.18522							0	594.25	1186.49	1186.48	0.0072101	MS-GF+ Beta (v9517)	2	0.00224381	SEVC[418]FGK
0.1.14516							0	416.542	1246.6	1246.6	0.00923786	MS-GF+ Beta (v9517)	3	0.00224552	KVPVAGC[418]R
0.1.24458							0	926.444	1850.87	1850.87	0.00446094	MS-GF+ Beta (v9517)	2	0.00224799	LSESVLSPPC[418]FVR
0.1.14409							0	425.86	1274.56	1274.55	0.00358961	MS-GF+ Beta (v9517)	3	0.00225006	IEC[418]SHIR
0.1.16360							0	662.328	1322.64	1322.64	0.0047982	MS-GF+ Beta (v9517)	2	0.00225294	IKC[418]LATEK
0.1.13742							0	839.364	1676.71	1676.7	0.00933082	MS-GF+ Beta (v9517)	2	0.0022547	HVLTGSADNSC[418]R
0.1.16421							0	430.201	1287.58	1287.57	0.00656498	MS-GF+ Beta (v9517)	3	0.00227077	AIC[418]LDHAK
0.1.22730							0	732.852	1463.69	1463.68	0.00981252	MS-GF+ Beta (v9517)	2	0.00228187	SC[418]GSLLPELK
0.1.21834							0	611.762	1221.51	1221.5	0.0105184	MS-GF+ Beta (v9517)	2	0.00229673	FC[418]PFYK
0.1.16844							0	672.278	1342.54	1342.53	0.0114377	MS-GF+ Beta (v9517)	2	0.00230545	M[16]QLVC[418]C[57]R
0.1.20473							0	547.613	1639.82	1639.81	0.00577005	MS-GF+ Beta (v9517)	3	0.00232063	QKVC[418]LDIIYK
0.1.14083							0	445.553	1333.64	1333.63	0.0105346	MS-GF+ Beta (v9517)	3	0.00232191	RTIAPC[418]QK
0.1.9383							0	395.172	1182.49	1182.49	0.00249968	MS-GF+ Beta (v9517)	3	0.00232859	KC[418]SASNR
0.1.18550							0	582.271	1162.53	1163.52	-0.994398	MS-GF+ Beta (v9517)	2	0.00233704	IAGLC[418]NR
0.1.23691							0	562.607	1684.8	1684.78	0.015995	MS-GF+ Beta (v9517)	3	0.00235255	VTDDLVC[418]LVYK
0.1.21516							0	605.3	1208.58	1208.57	0.0127027	MS-GF+ Beta (v9517)	2	0.00235533	VVFC[418]PVK
0.1.14534							0	591.76	1181.51	1181.5	0.00993845	MS-GF+ Beta (v9517)	2	0.00237133	ATNVC[418]TR
0.1.17355							0	626.791	1251.57	1251.56	0.00371253	MS-GF+ Beta (v9517)	2	0.00238879	LTEC[418]QLK
0.1.14085							0	484.892	1451.65	1451.64	0.01112	MS-GF+ Beta (v9517)	3	0.00239627	KC[418]STPEEIK
0.1.24137							0	717.37	1432.72	1432.71	0.0151293	MS-GF+ Beta (v9517)	2	0.00240328	ILSLC[418]PEIK
0.1.24422							0	660.311	1977.91	1975.91	1.99717	MS-GF+ Beta (v9517)	3	0.00242192	TQADELPAC[418]LLSAAR
0.1.14833							0	636.802	1271.59	1271.58	0.0110754	MS-GF+ Beta (v9517)	2	0.00243815	KAC[418]TYIR
0.1.14441							0	638.29	1274.56	1274.55	0.0111712	MS-GF+ Beta (v9517)	2	0.00244626	IEC[418]SHIR
0.1.15433							0	581.794	1161.57	1161.57	0.00610116	MS-GF+ Beta (v9517)	2	0.002497	GPLKC[418]VK
0.1.16736							0	712.824	1423.63	1422.62	1.01611	MS-GF+ Beta (v9517)	2	0.00250488	NVHYC[418]TLR
0.1.14581							0	498.904	1493.69	1493.68	0.0158083	MS-GF+ Beta (v9517)	3	0.00252108	AETAANRIC[418]K
0.1.23437							0	617.3	1848.88	1849.87	-0.99213	MS-GF+ Beta (v9517)	3	0.00253943	DLLVQQASQC[418]LSK
0.1.22231							0	636.302	1270.59	1270.58	0.0049816	MS-GF+ Beta (v9517)	2	0.00255885	TC[418]TFILR
0.1.15209							0	625.281	1248.55	1248.54	0.0104639	MS-GF+ Beta (v9517)	2	0.00258509	GVAC[418]TQPR
0.1.10082							0	1026.22	3075.63	3074.65	0.9861	MS-GF+ Beta (v9517)	3	0.00258969	KKVKIGTVEFPASC[418]TKVLKPMQPK
0.1.18253							0	523.925	1568.75	1568.75	0.00608527	MS-GF+ Beta (v9517)	3	0.00259928	VVHC[418]QPLDLK
0.1.15153							0	721.835	1441.66	1441.64	0.0151034	MS-GF+ Beta (v9517)	2	0.00260596	KC[418]LSVM[16]EAK
0.1.14791							0	608.789	1215.56	1213.56	2.00093	MS-GF+ Beta (v9517)	2	0.00262589	AFVKC[418]TK
0.1.25723							0	1064	2125.98	2123.97	2.01177	MS-GF+ Beta (v9517)	2	0.00263529	SGC[418]IVNNLAEFTVDPK
0.1.16175							0	572.24	1142.47	1142.46	0.002294	MS-GF+ Beta (v9517)	2	0.00266201	VANYC[418]R
0.1.20697							0	627.798	1253.58	1253.57	0.0119965	MS-GF+ Beta (v9517)	2	0.00275237	AC[418]QIFVR
0.1.22445							0	857.88	1713.75	1713.73	0.0141289	MS-GF+ Beta (v9517)	2	0.00275855	WGTLTDC[418]VVM[16]R
0.1.12027							0	605.776	1209.54	1209.53	0.010987	MS-GF+ Beta (v9517)	2	0.00294055	KC[418]SEVAR
0.1.16486							0	703.337	1404.66	1404.65	0.00578569	MS-GF+ Beta (v9517)	2	0.00296071	LHSVC[418]TLSK
0.1.16005							0	534.237	1066.46	1066.46	0.00209436	MS-GF+ Beta (v9517)	2	0.00298286	TGC[418]IGAK
0.1.16804							0	482.893	1445.66	1445.64	0.0149374	MS-GF+ Beta (v9517)	3	0.00303645	AC[418]VVHGSDLK
0.1.7372							0	403.84	1208.5	1208.49	0.00878907	MS-GF+ Beta (v9517)	3	0.00307708	M[16]TC[418]HKR
0.1.12011							0	404.186	1209.54	1209.53	0.00902054	MS-GF+ Beta (v9517)	3	0.0031717	KC[418]SEVAR
0.1.21233							0	595.303	1188.59	1188.58	0.012414	MS-GF+ Beta (v9517)	2	0.00331282	LPC[418]AVLR
0.1.19762							0	845.885	1689.75	1689.75	0.00186913	MS-GF+ Beta (v9517)	2	0.00365685	EYKC[418]GDLVFAK
0.1.24739							0	621.28	1240.54	1240.54	0.00762027	MS-GF+ Beta (v9517)	2	0.0037214	GC[418]LDFLR
0.1.9851							0	427.872	1280.6	1280.59	0.00586719	MS-GF+ Beta (v9517)	3	0.00377098	KEC[418]EVKK
0.1.23161							0	692.839	1383.66	1383.66	0.00673597	MS-GF+ Beta (v9517)	2	0.00385125	VC[418]LDIIYK
0.1.14639							0	607.248	1212.48	1212.47	0.0121956	MS-GF+ Beta (v9517)	2	0.00387591	YC[418]QEPR
0.1.19760							0	585.262	1168.51	1168.5	0.00458264	MS-GF+ Beta (v9517)	2	0.00389621	SPFAVC[418]K
0.1.23375							0	868.907	1735.8	1735.81	-0.00655134	MS-GF+ Beta (v9517)	2	0.0039328	SNYQGLPLPC[418]VK
0.1.24376							0	790.717	2369.13	2369.11	0.0220936	MS-GF+ Beta (v9517)	3	0.00398758	IIDINYYPVPEAC[418]LSNK
0.1.18403							0	567.282	1132.55	1132.54	0.00786999	MS-GF+ Beta (v9517)	2	0.00412254	AVVVC[418]PK
0.1.18515							0	567.282	1132.55	1132.54	0.00786999	MS-GF+ Beta (v9517)	2	0.00412268	AVVVC[418]PK
0.1.22482							0	627.297	1252.58	1252.57	0.00529238	MS-GF+ Beta (v9517)	2	0.00413689	LPFSC[418]LR
0.1.19117							0	721.309	1440.6	1440.6	0.00775858	MS-GF+ Beta (v9517)	2	0.00417345	KC[418]DSWWAK
0.1.13154							0	574.718	1147.42	1147.42	0.00345268	MS-GF+ Beta (v9517)	2	0.00419384	M[16]C[418]SM[16]VK
0.1.23149							0	774.044	2319.11	2319.1	0.0074063	MS-GF+ Beta (v9517)	3	0.00422153	ITNQVIYLNPPIEEC[418]R
0.1.14741							0	461.209	1380.61	1380.6	0.0108276	MS-GF+ Beta (v9517)	3	0.00422344	TVYC[418]NVHK
0.1.13057							0	574.717	1147.42	1147.42	0.0029644	MS-GF+ Beta (v9517)	2	0.00427355	M[16]C[418]SM[16]VK
0.1.18958							0	606.275	1210.54	1210.53	0.005903	MS-GF+ Beta (v9517)	2	0.00437377	ALAIM[16]C[418]R
0.1.11641							0	408.184	1221.53	1221.52	0.0115923	MS-GF+ Beta (v9517)	3	0.00440356	NFKC[418]HR
0.1.18886							0	582.24	1162.47	1162.46	0.00746545	MS-GF+ Beta (v9517)	2	0.0044279	QYGFC[418]K
0.1.18589							0	506.251	1515.73	1515.72	0.00886118	MS-GF+ Beta (v9517)	3	0.0044501	IVGPSGAAVPC[418]K
0.1.18506							0	667.31	1998.91	1999.91	-1.00503	MS-GF+ Beta (v9517)	3	0.00447972	SC[418]SLVLEHQPDNIK
0.1.22683							0	739.856	1477.7	1477.68	0.0123592	MS-GF+ Beta (v9517)	2	0.00451617	AAC[418]LPLPGYR
0.1.16082							0	430.19	1287.55	1287.55	0.00068072	MS-GF+ Beta (v9517)	3	0.0045791	HC[418]DLQVR
0.1.15072							0	537.725	1073.44	1073.43	0.00520596	MS-GF+ Beta (v9517)	2	0.00459856	AAC[418]YTK
0.1.13459							0	586.729	1171.44	1171.43	0.00778886	MS-GF+ Beta (v9517)	2	0.00460092	VM[16]EEC[418]K
0.1.12140							0	404.186	1209.54	1209.53	0.0103938	MS-GF+ Beta (v9517)	3	0.00464947	KC[418]SEVAR
0.1.15288							0	478.562	1432.67	1432.66	0.00642982	MS-GF+ Beta (v9517)	3	0.00467059	VKC[418]LGNPER
0.1.15495							0	638.269	1274.52	1274.52	0.00300667	MS-GF+ Beta (v9517)	2	0.00470309	FHPEC[418]PK
0.1.16721							0	644.785	1287.55	1287.55	0.00566837	MS-GF+ Beta (v9517)	2	0.0048017	HC[418]DNLLR
0.1.16271							0	604.767	1207.52	1207.51	0.00796026	MS-GF+ Beta (v9517)	2	0.00480267	ELQAAC[418]R
0.1.15293							0	611.754	1221.49	1221.49	0.00354922	MS-GF+ Beta (v9517)	2	0.00491903	DPVQC[418]SR
0.1.16812							0	618.31	1234.61	1234.6	0.0102277	MS-GF+ Beta (v9517)	2	0.00494032	KAC[418]VLQR
0.1.24450							0	545.925	1634.75	1632.75	1.99957	MS-GF+ Beta (v9517)	3	0.00501378	DGLAFC[418]AILHR
0.1.18888							0	615.272	1228.53	1228.53	0.00298452	MS-GF+ Beta (v9517)	2	0.00505238	SPYC[418]ITK
0.1.19811							0	490.236	1467.69	1467.68	0.0124791	MS-GF+ Beta (v9517)	3	0.00507368	GRLC[418]FEGLR
0.1.12158							0	464.524	1390.55	1390.54	0.0125453	MS-GF+ Beta (v9517)	3	0.00514193	DKM[16]C[418]SM[16]VK
0.1.15957							0	378.826	1133.46	1133.45	0.00298957	MS-GF+ Beta (v9517)	3	0.00518957	GC[418]PFHR
0.1.16290							0	407.85	1220.53	1220.52	0.00690232	MS-GF+ Beta (v9517)	3	0.0052456	LC[418]QFHR
0.1.8473							0	401.514	1201.52	1201.51	0.00929243	MS-GF+ Beta (v9517)	3	0.00527611	GKPHC[418]SR
0.1.18409							0	744.856	1487.7	1487.69	0.00797855	MS-GF+ Beta (v9517)	2	0.00528576	AVDALLTHC[418]K
0.1.17350							0	600.273	1198.53	1197.52	1.01563	MS-GF+ Beta (v9517)	2	0.00529379	SC[418]KSDLK
0.1.11704							0	363.496	1087.47	1087.46	0.00742299	MS-GF+ Beta (v9517)	3	0.00530658	HPVSC[418]K
0.1.11712							0	544.742	1087.47	1087.46	0.0106711	MS-GF+ Beta (v9517)	2	0.00530761	HPVSC[418]K
0.1.19745							0	604.288	1206.56	1206.55	0.00954833	MS-GF+ Beta (v9517)	2	0.00531037	VC[418]ADLIR
0.1.18720							0	582.73	1163.45	1163.44	0.00379655	MS-GF+ Beta (v9517)	2	0.00539069	FFSDC[418]K
0.1.15492							0	425.849	1274.52	1274.52	0.00290183	MS-GF+ Beta (v9517)	3	0.00542039	FHPEC[418]PK
0.1.21956							0	528.257	1581.75	1581.74	0.0147926	MS-GF+ Beta (v9517)	3	0.00543626	C[57]C[418]SGAIIVLTK
0.1.23695							0	932.907	1863.8	1863.79	0.011604	MS-GF+ Beta (v9517)	2	0.00551063	YGYEIPVDM[16]LC[418]K
0.1.17527							0	445.875	1334.6	1334.6	0.00436622	MS-GF+ Beta (v9517)	3	0.00555206	LSQEC[418]PIK
0.1.17342							0	623.298	1244.58	1244.57	0.0126971	MS-GF+ Beta (v9517)	2	0.00558317	IHDVLC[418]K
0.1.17622							0	486.229	1455.66	1455.66	0.00868686	MS-GF+ Beta (v9517)	3	0.0055858	KC[418]LISEM[16]AK
0.1.14179							0	431.21	1290.61	1290.61	-0.0019288	MS-GF+ Beta (v9517)	3	0.00563556	LC[418]GEVKPK
0.1.13898							0	557.222	1112.43	1112.42	0.00937435	MS-GF+ Beta (v9517)	2	0.00565577	M[16]C[418]VGNR
0.1.22555							0	952.442	1902.87	1903.86	-0.990097	MS-GF+ Beta (v9517)	2	0.00565672	QYQAGQTVTC[418]FLK
0.1.14177							0	665.787	1329.56	1329.55	0.0121964	MS-GF+ Beta (v9517)	2	0.00575962	TKFEEC[418]R
0.1.17391							0	563.262	1124.51	1124.5	0.00905767	MS-GF+ Beta (v9517)	2	0.00576729	LGSISC[418]K
0.1.14530							0	425.862	1274.56	1274.55	0.0110054	MS-GF+ Beta (v9517)	3	0.00577847	IEC[418]SHIR
0.1.10613							0	606.759	1211.5	1211.5	0.00840988	MS-GF+ Beta (v9517)	2	0.00578444	SKEEAC[418]K
0.1.10500							0	606.76	1211.5	1211.5	0.00987473	MS-GF+ Beta (v9517)	2	0.00582099	SKEEAC[418]K
0.1.16180							0	575.758	1149.5	1149.49	0.00587413	MS-GF+ Beta (v9517)	2	0.00584355	NC[418]PISAK
0.1.11748							0	354.156	1059.45	1059.44	0.0083247	MS-GF+ Beta (v9517)	3	0.00590843	AC[418]VHGR
0.1.19034							0	889.398	1776.78	1776.77	0.0145768	MS-GF+ Beta (v9517)	2	0.00591146	LLEC[418]HFM[16]PPEK
0.1.16561							0	601.744	1201.47	1201.46	0.0098665	MS-GF+ Beta (v9517)	2	0.00608909	NC[418]GSFTR
0.1.16288							0	416.878	1247.61	1247.6	0.00898129	MS-GF+ Beta (v9517)	3	0.00610402	LKEPC[418]LK
0.1.15775							0	550.253	1647.74	1647.72	0.0165627	MS-GF+ Beta (v9517)	3	0.00620514	RSEVPC[418]APM[16]PK
0.1.20192							0	537.775	2147.07	2147.06	0.0152778	MS-GF+ Beta (v9517)	4	0.00631196	LC[418]HIAFHVPAGQPLAR
0.1.21989							0	470.566	1408.68	1408.66	0.0123863	MS-GF+ Beta (v9517)	3	0.00633696	RC[418]ILPFDK
0.1.14064							0	627.271	1252.53	1252.52	0.00639691	MS-GF+ Beta (v9517)	2	0.00635382	IQAESGC[418]K
0.1.20163							0	595.746	1189.48	1189.47	0.00913966	MS-GF+ Beta (v9517)	2	0.00642389	FAC[418]FER
0.1.11013							0	436.509	1306.5	1306.5	0.00427234	MS-GF+ Beta (v9517)	3	0.0064932	M[16]C[418]HNVNR
0.1.14759							0	391.851	1172.53	1172.52	0.00928269	MS-GF+ Beta (v9517)	3	0.00652432	VHLQC[418]R
0.1.20286							0	595.746	1189.48	1189.47	0.00901759	MS-GF+ Beta (v9517)	2	0.00659013	FAC[418]FER
0.1.13638							0	586.224	1170.43	1170.43	0.00694679	MS-GF+ Beta (v9517)	2	0.00661036	VSEC[418]C[57]R
0.1.25821							0	765.371	2293.09	2293.08	0.015552	MS-GF+ Beta (v9517)	3	0.00662165	FLDGNELTLADC[418]NLLPK
0.1.14939							0	616.275	1230.53	1230.53	0.00747877	MS-GF+ Beta (v9517)	2	0.00665122	AIC[418]DHVR
0.1.11390							0	426.176	1275.51	1275.5	0.00554449	MS-GF+ Beta (v9517)	3	0.00727353	TC[418]GPEHSK
0.1.14929							0	572.268	1713.78	1713.77	0.0111828	MS-GF+ Beta (v9517)	3	0.00757602	PGGARPC[418]SPGLER
0.1.24529							0	727.591	2906.34	2906.31	0.0201742	MS-GF+ Beta (v9517)	4	0.00832567	DTGTVHLNELGNTQNFM[16]LLC[418]PR
0.1.15774							0	434.2	1732.77	1732.75	0.0143339	MS-GF+ Beta (v9517)	4	0.00841108	KGDEC[418]ELLGHSK
0.1.23609							0	717.848	1433.68	1432.68	0.998045	MS-GF+ Beta (v9517)	2	0.00855223	IVDC[418]LLPSR
0.1.8494							0	431.869	1292.58	1292.58	0.00870803	MS-GF+ Beta (v9517)	3	0.00875568	RC[418]TKPDR
0.1.19056							0	602.621	1804.84	1804.83	0.00986059	MS-GF+ Beta (v9517)	3	0.00920138	IHEAC[418]M[16]LALGSVK
0.1.11569							0	443.522	1327.54	1327.54	0.00862378	MS-GF+ Beta (v9517)	3	0.00984976	VM[16]EEC[418]KR
0.1.13114							0	392.854	1175.54	1175.53	0.00882066	MS-GF+ Beta (v9517)	3	0.00994064	LRGC[418]GPR
0.1.12447							0	378.493	1132.46	1132.45	0.00332941	MS-GF+ Beta (v9517)	3	0.00994725	NSHC[418]VR
0.1.20122							0	684.813	1367.61	1367.6	0.0075713	MS-GF+ Beta (v9517)	2	0.0100744	SC[418]NC[57]LLLK
0.1.22209							0	644.272	1286.53	1286.52	0.00898811	MS-GF+ Beta (v9517)	2	0.0102694	FC[418]PFAER
0.1.21982							0	604.306	1206.6	1206.59	0.00917357	MS-GF+ Beta (v9517)	2	0.0104653	SC[418]VIVLR
0.1.13381							0	576.237	1150.46	1150.45	0.0061171	MS-GF+ Beta (v9517)	2	0.0105275	PQTEC[418]R
0.1.12958							0	518.211	1034.41	1034.41	0.00109306	MS-GF+ Beta (v9517)	2	0.0107552	PGQC[418]GR
0.1.19246							0	620.792	1239.57	1239.56	0.00725257	MS-GF+ Beta (v9517)	2	0.0108738	ASLC[418]ISTK
0.1.14099							0	688.284	1374.55	1374.54	0.00890755	MS-GF+ Beta (v9517)	2	0.0108986	DKMC[418]SM[16]VK
0.1.11406							0	418.179	1251.52	1251.51	0.00337482	MS-GF+ Beta (v9517)	3	0.0109643	EAAREC[418]R
0.1.16127							0	568.753	1135.49	1135.49	0.00150174	MS-GF+ Beta (v9517)	2	0.0110463	GC[418]AQALR
0.1.15225							0	382.187	1143.54	1143.53	0.00817431	MS-GF+ Beta (v9517)	3	0.0111197	VLVHC[418]R
0.1.15223							0	572.779	1143.54	1143.53	0.0113004	MS-GF+ Beta (v9517)	2	0.0111744	VLVHC[418]R
0.1.8829							0	481.53	1441.57	1441.56	0.00743047	MS-GF+ Beta (v9517)	3	0.0111996	AHGDTQHC[418]R
0.1.20194							0	585.78	1169.55	1169.54	0.00908098	MS-GF+ Beta (v9517)	2	0.0112758	YVIC[418]VR
0.1.15505							0	589.81	1177.61	1177.6	0.00751588	MS-GF+ Beta (v9517)	2	0.0113188	VAVKC[418]IK
0.1.8505							0	324.153	1292.58	1292.58	0.00741301	MS-GF+ Beta (v9517)	4	0.0115417	RC[418]TKPDR
0.1.18956							0	660.313	1318.61	1318.6	0.00728973	MS-GF+ Beta (v9517)	2	0.0115851	LIPDGC[418]GVK
0.1.15846							0	443.865	1328.57	1328.56	0.00822267	MS-GF+ Beta (v9517)	3	0.0119047	DINRYC[418]K
0.1.23841							0	778.369	1554.72	1554.72	0.00191511	MS-GF+ Beta (v9517)	2	0.0130803	IAC[418]LDFSLQK
0.1.12932							0	555.231	1108.45	1108.44	0.00386441	MS-GF+ Beta (v9517)	2	0.0137449	VC[418]QGER
0.1.24909							0	647.826	1293.64	1293.62	0.0116966	MS-GF+ Beta (v9517)	2	0.0138118	GIFPVLC[418]K
0.1.13235							0	853.365	1704.71	1704.71	0.00513594	MS-GF+ Beta (v9517)	2	0.0138446	ATGHSGGGC[418]ISQGR
0.1.15043							0	422.873	1265.6	1265.59	0.00800476	MS-GF+ Beta (v9517)	3	0.0138478	LSEC[418]LKR
0.1.19068							0	719.823	1437.63	1437.63	0.00447505	MS-GF+ Beta (v9517)	2	0.013882	AESQLLEC[418]K
0.1.14359							0	511.715	1021.42	1021.41	0.00439868	MS-GF+ Beta (v9517)	2	0.0139555	TGAPC[418]R
0.1.14332							0	511.715	1021.42	1021.41	0.00452075	MS-GF+ Beta (v9517)	2	0.0139574	TGAPC[418]R
0.1.11876							0	567.25	1132.49	1132.48	0.00678554	MS-GF+ Beta (v9517)	2	0.0139637	HIQSC[418]K
0.1.9041							0	641.303	1280.59	1280.59	0.00255405	MS-GF+ Beta (v9517)	2	0.0139791	IKC[418]DKEK
0.1.18820							0	618.766	1235.52	1236.52	-0.998802	MS-GF+ Beta (v9517)	2	0.0140812	QVC[418]WGAR
0.1.12082							0	696.283	1390.55	1390.54	0.0125281	MS-GF+ Beta (v9517)	2	0.0141138	DKM[16]C[418]SM[16]VK
0.1.24022							0	670.846	1339.68	1339.67	0.0104812	MS-GF+ Beta (v9517)	2	0.0141822	ALC[418]YLVLK
0.1.15592							0	582.764	1163.51	1163.51	0.00328559	MS-GF+ Beta (v9517)	2	0.0143629	ATQC[418]VPK
0.1.24503							0	981.964	1961.91	1960.92	0.995511	MS-GF+ Beta (v9517)	2	0.014554	GQVC[418]LPVISAENWK
0.1.10233							0	537.221	1072.43	1072.42	0.00534046	MS-GF+ Beta (v9517)	2	0.016239	GHNC[418]PK
0.1.20814							0	561.283	1120.55	1120.54	0.0101893	MS-GF+ Beta (v9517)	2	0.0174099	ALVGLC[418]K
0.1.25704							0	750.347	1498.68	1497.66	1.01562	MS-GF+ Beta (v9517)	2	0.0175747	RC[418]ACSKGSLR
0.1.16764							0	876.417	1750.82	1750.8	0.0180694	MS-GF+ Beta (v9517)	2	0.0175796	EVLTEDKC[418]LQR
0.1.12435							0	637.264	1272.51	1272.5	0.0124256	MS-GF+ Beta (v9517)	2	0.0176432	GDYNKC[418]R
0.1.18567							0	804.016	2409.03	2409.01	0.0196805	MS-GF+ Beta (v9517)	3	0.0176809	YEDIC[418]PSTHNM[16]DVPNIK
0.1.22098							0	464.89	1391.65	1391.64	0.0108593	MS-GF+ Beta (v9517)	3	0.0178446	DVC[418]FHLLK
0.1.25105							0	783.399	2347.18	2347.17	0.00612691	MS-GF+ Beta (v9517)	3	0.0178873	KC[418]PFGALSIVNLPSNLEK
0.1.20765							0	625.288	1248.56	1248.55	0.00887426	MS-GF+ Beta (v9517)	2	0.0179409	EEPC[418]LLK
0.1.11063							0	583.266	1164.52	1164.51	0.0115767	MS-GF+ Beta (v9517)	2	0.0179446	TNKPC[418]GK
0.1.12072							0	465.205	1392.59	1392.58	0.0111049	MS-GF+ Beta (v9517)	3	0.0179542	GHSC[418]YRPR
0.1.8981							0	1004.94	2007.87	2008.86	-0.987019	MS-GF+ Beta (v9517)	2	0.0179642	PLHFTYNSC[418]PEGAR
0.1.13509							0	537.738	1073.46	1073.45	0.00812981	MS-GF+ Beta (v9517)	2	0.0179854	HC[418]GALR
0.1.17369							0	586.748	1171.48	1171.48	0.00284743	MS-GF+ Beta (v9517)	2	0.0180302	YLAEC[418]R
0.1.19499							0	584.261	1166.51	1166.5	0.00680205	MS-GF+ Beta (v9517)	2	0.0181441	QC[418]VPFR
0.1.21941							0	428.201	1281.58	1281.57	0.0138504	MS-GF+ Beta (v9517)	3	0.0182201	SILC[418]C[57]LR
0.1.11918							0	639.72	1277.43	1277.42	0.00773342	MS-GF+ Beta (v9517)	2	0.0183741	M[16]SC[418]M[16]DNK
0.1.14597							0	377.504	1129.49	1129.48	0.011809	MS-GF+ Beta (v9517)	3	0.0189303	PHC[418]SLR
0.1.19352							0	603.25	1204.49	1204.48	0.00605312	MS-GF+ Beta (v9517)	2	0.0194667	EPC[418]PWR
0.1.25397							0	959.95	1917.89	1916.87	1.0166	MS-GF+ Beta (v9517)	2	0.0194749	FETFC[418]LDPSLVTK
0.1.22023							0	641.796	1281.58	1281.57	0.0105373	MS-GF+ Beta (v9517)	2	0.0199209	SILC[57]C[418]LR
0.1.8828							0	518.573	1552.7	1552.69	0.0109742	TagRecon 1.4.47	3	0.00231549	KRC[418]PSQSSSR
0.1.9041							0	641.303	1280.59	1280.59	0.00253158	TagRecon 1.4.47	2	0.00962421	IKC[418]DKEK
0.1.10613							0	606.759	1211.5	1211.5	0.00841353	TagRecon 1.4.47	2	0.0102853	SKEEAC[418]K
0.1.11059							0	521.932	1562.77	1562.76	0.0156636	TagRecon 1.4.47	3	0.00410121	NKVC[418]TEKPVK
0.1.11296							0	624.961	1871.86	1871.84	0.0213026	TagRecon 1.4.47	3	0.00239895	KIC[418]SHSAPEQQAR
0.1.11305							0	509.588	1525.74	1525.73	0.013043	TagRecon 1.4.47	3	0.00228004	IVAAHNKC[418]PR
0.1.11728							0	417.19	1248.55	1248.54	0.00938541	TagRecon 1.4.47	3	0.0183811	SKPC[418]GSPR
0.1.11750							0	411.518	1231.53	1231.52	0.00997813	TagRecon 1.4.47	3	0.00248725	VVNSC[418]HR
0.1.11966							0	565.907	1694.7	1694.69	0.0143805	TagRecon 1.4.47	3	0.00335821	IHM[16]GSC[418]AENTAK
0.1.11990							0	417.182	1248.52	1248.51	0.0098809	TagRecon 1.4.47	3	0.00304393	RC[418]DAGGPR
0.1.12810							0	660.3	1318.58	1318.58	0.00512476	TagRecon 1.4.47	2	0.00337635	TATAVAHC[418]K
0.1.12975							0	483.541	1447.6	1447.6	0.00431671	TagRecon 1.4.47	3	0.00367161	HC[418]SQVDSVR
0.1.13042							0	557.909	1670.71	1670.7	0.00594819	TagRecon 1.4.47	3	0.00232197	KC[418]YEM[16]ASHLR
0.1.13071							0	717.652	2149.93	2149.93	0.00246974	TagRecon 1.4.47	3	0.00174894	ATC[418]APQHGAPGPGPADASK
0.1.13135							0	643.595	1927.76	1927.77	-0.000999159	TagRecon 1.4.47	3	0.00408122	HM[16]AAASAEC[418]QNYAK
0.1.13140							0	557.909	1670.71	1670.7	0.00471027	TagRecon 1.4.47	3	0.0068827	KC[418]YEM[16]ASHLR
0.1.13148							0	504.56	1510.66	1510.65	0.00344731	TagRecon 1.4.47	3	0.00239501	KC[418]GIQDTNSK
0.1.13157							0	756.338	1510.66	1510.65	0.0069793	TagRecon 1.4.47	2	0.00321747	KC[418]GIQDTNSK
0.1.13188							0	569.247	1704.72	1704.71	0.00961679	TagRecon 1.4.47	3	0.00468566	ATGHSGGGC[418]ISQGR
0.1.13247							0	648.776	1295.54	1295.53	0.00946786	TagRecon 1.4.47	2	0.0100693	IQQDSGC[418]K
0.1.13282							0	661.262	1320.51	1320.5	0.0110907	TagRecon 1.4.47	2	0.00342153	GPAGNNDC[418]R
0.1.13369							0	629.62	1885.84	1885.82	0.0191631	TagRecon 1.4.47	3	0.00238119	ELC[418]HTQSSHASLR
0.1.13381							0	576.237	1150.46	1150.45	0.00607122	TagRecon 1.4.47	2	0.0154733	PQTEC[418]R
0.1.13440							0	535.245	2136.95	2136.94	0.0164835	TagRecon 1.4.47	4	0.0162784	IHEGC[418]EEPATHNALAK
0.1.13441							0	713.323	2136.95	2136.94	0.0127352	TagRecon 1.4.47	3	0.00185082	IHEGC[418]EEPATHNALAK
0.1.13475							0	1069.48	2136.94	2136.94	0.00742664	TagRecon 1.4.47	2	0.00322608	IHEGC[418]EEPATHNALAK
0.1.13551							0	523.556	1567.65	1567.64	0.00771846	TagRecon 1.4.47	3	0.00982249	ERIC[418]SEEER
0.1.13572							0	713.323	2136.95	2136.94	0.0106329	TagRecon 1.4.47	3	0.00227469	IHEGC[418]EEPATHNALAK
0.1.13637							0	537.595	1609.76	1609.75	0.0136102	TagRecon 1.4.47	3	0.00236323	AQGTHVLVHC[418]K
0.1.13659							0	471.201	1410.58	1410.57	0.00895438	TagRecon 1.4.47	3	0.00447282	M[16]LPDKDC[418]R
0.1.13700							0	559.913	1676.72	1676.7	0.0139724	TagRecon 1.4.47	3	0.00368056	HVLTGSADNSC[418]R
0.1.13708							0	706.299	1410.58	1410.57	0.0104598	TagRecon 1.4.47	2	0.00858494	M[16]LPDKDC[418]R
0.1.13721							0	673.637	2017.89	2017.87	0.0155405	TagRecon 1.4.47	3	0.00235775	LQAQVEC[418]SHSSQQR
0.1.13726							0	888.054	2661.14	2661.12	0.0179059	TagRecon 1.4.47	3	0.00166779	KSC[418]VEEPEPEPEAAEGDGDKK
0.1.13734							0	666.293	2661.14	2661.12	0.0212989	TagRecon 1.4.47	4	0.0168797	KSC[418]VEEPEPEPEAAEGDGDKK
0.1.13787							0	471.202	1410.58	1410.57	0.0103422	TagRecon 1.4.47	3	0.00346094	M[16]LPDKDC[418]R
0.1.13792							0	791.846	1581.68	1581.67	0.0102333	TagRecon 1.4.47	2	0.003281	TGSQGQC[418]TQVR
0.1.13838							0	722.826	1443.64	1443.63	0.00942215	TagRecon 1.4.47	2	0.00327411	RC[418]QYVTEK
0.1.13839							0	529.914	1586.72	1586.71	0.0128526	TagRecon 1.4.47	3	0.00272349	ADVAGPRPC[418]QR
0.1.13840							0	690.799	1379.58	1379.58	0.00862075	TagRecon 1.4.47	2	0.0101848	AC[418]VGNAYHK
0.1.13852							0	493.231	1476.67	1476.66	0.0107962	TagRecon 1.4.47	3	0.0186004	RVC[418]TNPVDR
0.1.13893							0	591.263	1770.77	1770.75	0.0190013	TagRecon 1.4.47	3	0.00266573	RDLM[16]AC[418]AQTGSGK
0.1.13901							0	790.322	1578.63	1578.62	0.010789	TagRecon 1.4.47	2	0.00530629	GNSPPSSGEAC[418]R
0.1.13909							0	604.801	1207.59	1207.57	0.0141394	TagRecon 1.4.47	2	0.0180978	KIVEAC[418]K
0.1.13976							0	520.578	1558.71	1558.7	0.0101571	TagRecon 1.4.47	3	0.00235512	KPDSVSLHC[418]R
0.1.13979							0	694.296	1386.58	1386.57	0.00770745	TagRecon 1.4.47	2	0.00878061	DFNTNKC[418]K
0.1.13985							0	507.588	1519.74	1519.73	0.0144565	TagRecon 1.4.47	3	0.0022612	TVAKC[418]QVTPR
0.1.13990							0	760.877	1519.74	1519.73	0.0109304	TagRecon 1.4.47	2	0.0084634	TVAKC[418]QVTPR
0.1.13997							0	922.389	1842.76	1842.75	0.0151782	TagRecon 1.4.47	2	0.0187352	VM[16]SQNFTNC[418]HTK
0.1.14107							0	595.255	2376.99	2376.97	0.025515	TagRecon 1.4.47	4	0.0192032	TTM[16]RPQSFYDGSHSC[418]AR
0.1.14199							0	704.01	2109.01	2108.99	0.0212212	TagRecon 1.4.47	3	0.00189991	RELHGQNPVVTPC[418]NK
0.1.14200							0	786.328	1570.64	1570.63	0.00879614	TagRecon 1.4.47	2	0.00342278	TAGQTGM[16]C[418]GGVR
0.1.14252							0	562.586	1684.74	1684.73	0.0114882	TagRecon 1.4.47	3	0.00377657	STNM[16]KC[418]LTPEK
0.1.14297							0	594.626	1780.86	1780.85	0.00618264	TagRecon 1.4.47	3	0.00187653	KNC[418]PHVVVGTPGR
0.1.14325							0	508.573	1522.7	1522.69	0.00634768	TagRecon 1.4.47	3	0.00237223	VEEIAASKC[418]R
0.1.14332							0	511.715	1021.42	1021.41	0.00449524	TagRecon 1.4.47	2	0.00876576	TGAPC[418]R
0.1.14333							0	632.626	1894.86	1894.85	0.00762656	TagRecon 1.4.47	3	0.00210421	M[16]RPGVAC[418]SVSQAQK
0.1.14344							0	525.233	1572.68	1572.67	0.00685011	TagRecon 1.4.47	3	0.00334171	LNEC[418]VDHTPK
0.1.14359							0	511.715	1021.42	1021.41	0.00441641	TagRecon 1.4.47	2	0.00963055	TGAPC[418]R
0.1.14360							0	762.355	1522.69	1522.69	0.00410981	TagRecon 1.4.47	2	0.00331017	VEEIAASKC[418]R
0.1.14445							0	632.628	1894.86	1894.85	0.0134374	TagRecon 1.4.47	3	0.00233458	M[16]RPGVAC[418]SVSQAQK
0.1.14476							0	747.852	1493.69	1493.68	0.0137224	TagRecon 1.4.47	2	0.00326507	AETAANRIC[418]K
0.1.14498							0	540.247	1617.72	1617.7	0.0162227	TagRecon 1.4.47	3	0.00230784	QTPLTC[418]SGHTR
0.1.14537							0	557.92	1670.74	1670.72	0.0190194	TagRecon 1.4.47	3	0.00232176	VRNC[418]SSPEFSK
0.1.14595							0	719.083	2872.3	2872.28	0.0275491	TagRecon 1.4.47	4	0.0177365	ENSGAAEKPVTIHATPEGTSEAC[418]R
0.1.14658							0	750.684	2249.03	2249.02	0.00887487	TagRecon 1.4.47	3	0.001776	RGPEVTSQGVQTSSPAC[418]K
0.1.14755							0	474.889	1421.64	1421.63	0.0126711	TagRecon 1.4.47	3	0.00236921	GPTKEELC[418]K
0.1.14775							0	796.007	2385	2384.99	0.0106535	TagRecon 1.4.47	3	0.00306362	TYPGVM[16]HSSC[418]PQEM[16]AAVK
0.1.14834							0	488.568	1462.68	1462.67	0.0125283	TagRecon 1.4.47	3	0.0144937	VKC[418]SGPGLER
0.1.14869							0	595.544	2378.15	2378.13	0.0225365	TagRecon 1.4.47	4	0.0190489	NVIQEPRPC[418]GGPHTAVGTK
0.1.14895							0	587.622	1759.84	1759.82	0.018364	TagRecon 1.4.47	3	0.00218764	QRPGQQVATC[418]VR
0.1.14900							0	635.282	1902.82	1902.81	0.0172135	TagRecon 1.4.47	3	0.00234211	SM[16]SVYC[418]TPNKPSR
0.1.14908							0	796.009	2385	2384.99	0.0148049	TagRecon 1.4.47	3	0.00767026	TYPGVM[16]HSSC[418]PQEM[16]AAVK
0.1.14916							0	717.983	2150.93	2150.91	0.0115082	TagRecon 1.4.47	3	0.00192961	HELQANC[418]YEEVKDR
0.1.14917							0	709.67	2125.99	2125.97	0.012613	TagRecon 1.4.47	3	0.00218965	ISC[418]M[16]SKPPAPNPTPPR
0.1.14919							0	811.839	1621.66	1621.65	0.00913224	TagRecon 1.4.47	2	0.00829804	YSC[418]QEGDKFK
0.1.14927							0	538.74	2150.93	2150.91	0.0173834	TagRecon 1.4.47	4	0.0166874	HELQANC[418]YEEVKDR
0.1.14949							0	502.592	1504.75	1504.74	0.011059	TagRecon 1.4.47	3	0.00691032	KELC[418]ELKPK
0.1.14965							0	883.706	2648.1	2648.07	0.0267925	TagRecon 1.4.47	3	0.00221394	TTSSANNPNLM[16]YQDEC[418]DRR
0.1.14977							0	1076.47	2150.93	2150.91	0.0116613	TagRecon 1.4.47	2	0.00229358	HELQANC[418]YEEVKDR
0.1.15004							0	695.63	2083.87	2083.85	0.0200116	TagRecon 1.4.47	3	0.00181264	VAAASGHC[418]GAFSGSDSSR
0.1.15014							0	526.579	1576.72	1576.7	0.0133447	TagRecon 1.4.47	3	0.0023304	GHHGC[418]PLVSPR
0.1.15048							0	709.672	2125.99	2125.97	0.0195352	TagRecon 1.4.47	3	0.00203765	ISC[418]M[16]SKPPAPNPTPPR
0.1.15049							0	717.985	2150.93	2150.91	0.0188478	TagRecon 1.4.47	3	0.00182646	HELQANC[418]YEEVKDR
0.1.15157							0	552.583	1654.73	1654.71	0.0206723	TagRecon 1.4.47	3	0.00227639	KC[418]YEMASHLR
0.1.15177							0	614.293	1839.86	1839.84	0.0172696	TagRecon 1.4.47	3	0.00231903	AKPPADPAAAASPC[418]R
0.1.15190							0	677.307	1352.6	1352.59	0.0149158	TagRecon 1.4.47	2	0.0146718	DRC[418]TLAEK
0.1.15195							0	507.568	1519.68	1519.67	0.0161729	TagRecon 1.4.47	3	0.00374311	RC[418]QLTPNDR
0.1.15211							0	756.844	3023.35	3023.32	0.0278921	TagRecon 1.4.47	4	0.0181449	TAPSSSC[418]TAVASAASRPDSTHM[16]VEAR
0.1.15226							0	602.619	1804.84	1804.82	0.012633	TagRecon 1.4.47	3	0.00237351	EIGQKC[418]PQELSR
0.1.15298							0	643.641	1927.9	1927.89	0.00957731	TagRecon 1.4.47	3	0.00225678	KHPSSPEC[418]LVSAQK
0.1.15354							0	599.298	1794.87	1794.87	0.00560423	TagRecon 1.4.47	3	0.00230869	KNC[418]PHIVVGTPGR
0.1.15369							0	581.262	1740.76	1740.76	0.00499375	TagRecon 1.4.47	3	0.00214454	NSAKDC[418]YPAVQK
0.1.15378							0	627.297	1878.87	1878.85	0.0140055	TagRecon 1.4.47	3	0.00213139	MRPGVAC[418]SVSQAQK
0.1.15405							0	504.882	1511.62	1511.62	0.00552298	TagRecon 1.4.47	3	0.00240303	TDGC[418]HAYLSK
0.1.15450							0	578.577	1732.71	1732.7	0.00917534	TagRecon 1.4.47	3	0.0194454	EC[57]GHDVTC[418]PVAK
0.1.15452							0	626.283	1250.55	1250.54	0.00907898	TagRecon 1.4.47	2	0.0186119	ITGC[418]ASPGK
0.1.15489							0	785.347	1568.68	1568.68	0.00433176	TagRecon 1.4.47	2	0.00332482	VQYPQSQAC[418]K
0.1.15494							0	934.422	2800.24	2800.24	0.00810347	TagRecon 1.4.47	3	0.00121826	EAQNLQC[418]AASTAQESC[57]PPKPPR
0.1.15498							0	752.859	1503.7	1503.7	0.00649525	TagRecon 1.4.47	2	0.00809426	AAVPDAVGKC[418]R
0.1.15507							0	833.355	2497.04	2497.04	0.00625285	TagRecon 1.4.47	3	0.00167454	TKSC[418]SGVEFSTSGSSNTDTGK
0.1.15550							0	681.827	2723.28	2723.26	0.0172004	TagRecon 1.4.47	4	0.0176388	LKPLPGETM[16]EKC[418]TQDLGNSTK
0.1.15638							0	638.975	1913.9	1913.89	0.0165725	TagRecon 1.4.47	3	0.00229841	AIPQVKC[418]NEQPNR
0.1.15645							0	733.349	1464.68	1464.67	0.00882526	TagRecon 1.4.47	2	0.0179552	KC[418]LEEQGLK
0.1.15655							0	489.236	1464.69	1464.67	0.0122508	TagRecon 1.4.47	3	0.00219201	KC[418]LEEQGLK
0.1.15742							0	570.749	1139.48	1139.47	0.00959139	TagRecon 1.4.47	2	0.0180435	SC[418]AGISGK
0.1.15748							0	578.597	1732.77	1732.75	0.0142565	TagRecon 1.4.47	3	0.00266851	KGDEC[418]ELLGHSK
0.1.15822							0	540.908	1619.7	1619.69	0.0136103	TagRecon 1.4.47	3	0.0022591	HC[418]NM[16]VLENVK
0.1.15823							0	611.268	1220.52	1220.51	0.0100271	TagRecon 1.4.47	2	0.00841351	TFC[418]PAHK
0.1.15825							0	810.856	1619.7	1619.69	0.00874614	TagRecon 1.4.47	2	0.00304089	HC[418]NM[16]VLENVK
0.1.15833							0	594.774	2375.07	2375.04	0.0233067	TagRecon 1.4.47	4	0.0184602	TGVHHYSGNNIELGTAC[418]GK
0.1.15852							0	663.637	1987.89	1987.88	0.0119118	TagRecon 1.4.47	3	0.00184969	VLTGVAGEDAEC[418]HAAK
0.1.15853							0	609.947	1826.82	1826.81	0.00721965	TagRecon 1.4.47	3	0.00232838	VTKC[418]C[57]TESLVNR
0.1.15879							0	994.95	1987.89	1987.88	0.00874926	TagRecon 1.4.47	2	0.00292507	VLTGVAGEDAEC[418]HAAK
0.1.15886							0	569.928	1706.76	1706.76	0.00422133	TagRecon 1.4.47	3	0.00225942	TIC[418]SHVQNM[16]IK
0.1.15888							0	489.557	1465.65	1465.64	0.00444104	TagRecon 1.4.47	3	0.0073802	LRC[418]DSADLR
0.1.15895							0	854.39	1706.76	1706.76	0.00697707	TagRecon 1.4.47	2	0.00951489	TIC[418]SHVQNM[16]IK
0.1.15899							0	548.594	1642.76	1642.76	-0.000137997	TagRecon 1.4.47	3	0.00239064	YLANKC[418]SIASR
0.1.15914							0	714.32	2853.25	2853.25	-0.00309933	TagRecon 1.4.47	4	0.0150163	HELQANC[57]YEEVKDRC[418]TLAEK
0.1.15928							0	952.094	2853.26	2853.25	0.00698165	TagRecon 1.4.47	3	0.00141368	HELQANC[57]YEEVKDRC[418]TLAEK
0.1.15950							0	487.906	1460.7	1460.69	0.00516727	TagRecon 1.4.47	3	0.00285879	KAQC[418]PIVER
0.1.15954							0	731.356	1460.7	1460.69	0.00658986	TagRecon 1.4.47	2	0.00333693	KAQC[418]PIVER
0.1.16005							0	534.237	1066.46	1066.46	0.00207311	TagRecon 1.4.47	2	0.0105177	TGC[418]IGAK
0.1.16016							0	631.326	1260.64	1260.64	0.00189849	TagRecon 1.4.47	2	0.00327562	KAVVVC[418]PK
0.1.16020							0	487.905	1460.69	1460.69	0.00417261	TagRecon 1.4.47	3	0.0024093	KAQC[418]PIVER
0.1.16026							0	731.354	1460.69	1460.69	0.00298494	TagRecon 1.4.47	2	0.00325043	KAQC[418]PIVER
0.1.16035							0	502.254	1503.74	1503.73	0.00625852	TagRecon 1.4.47	3	0.00251086	LNKC[418]GVISPR
0.1.16038							0	658.815	1315.62	1315.62	-0.000413181	TagRecon 1.4.47	2	0.0127613	IAVHC[418]TVR
0.1.16049							0	607.954	1820.84	1820.84	0.0017069	TagRecon 1.4.47	3	0.00219804	VKC[418]SGPGLSPGM[16]VR
0.1.16052							0	752.877	1503.74	1503.73	0.00635434	TagRecon 1.4.47	2	0.00863678	LNKC[418]GVISPR
0.1.16071							0	644.784	1287.55	1287.55	0.00440704	TagRecon 1.4.47	2	0.0082437	HC[418]DLQVR
0.1.16073							0	627.605	1879.79	1879.79	0.00718861	TagRecon 1.4.47	3	0.00239592	HELQANC[418]YEEVK
0.1.16076							0	651.973	1952.9	1952.89	0.0111743	TagRecon 1.4.47	3	0.00236815	ELHGQNPVVTPC[418]NK
0.1.16085							0	493.249	1476.73	1476.72	0.00347592	TagRecon 1.4.47	3	0.002375	VIVKC[418]PTSGR
0.1.16087							0	819.824	1637.63	1637.63	0.00475416	TagRecon 1.4.47	2	0.0147438	YC[418]YYNETHK
0.1.16118							0	470.227	1407.66	1407.65	0.005005	TagRecon 1.4.47	3	0.00228208	KC[418]LEELQK
0.1.16126							0	704.836	1407.66	1407.65	0.00405682	TagRecon 1.4.47	2	0.00988951	KC[418]LEELQK
0.1.16136							0	680.309	1358.6	1358.6	0.00319278	TagRecon 1.4.47	2	0.00346577	ATYDKLC[418]K
0.1.16140							0	502.252	1503.74	1503.73	0.00292006	TagRecon 1.4.47	3	0.00238017	LNKC[418]GVISPR
0.1.16152							0	616.616	1846.83	1846.82	0.00188574	TagRecon 1.4.47	3	0.00212029	RDPHLAC[418]VAYER
0.1.16166							0	748.841	1495.67	1495.65	0.0121991	TagRecon 1.4.47	2	0.00338088	SVSVTAAGQC[418]R
0.1.16179							0	561.232	1680.67	1680.67	0.00851723	TagRecon 1.4.47	3	0.00390998	SFGAEEHEVC[418]R
0.1.16194							0	543.882	1628.63	1628.62	0.00817207	TagRecon 1.4.47	3	0.00228524	SC[418]YDLSC[57]HAR
0.1.16198							0	841.345	1680.67	1680.67	0.00885593	TagRecon 1.4.47	2	0.00823072	SFGAEEHEVC[418]R
0.1.16202							0	755.659	2263.95	2263.95	0.00591025	TagRecon 1.4.47	3	0.00233242	M[16]LVQC[418]M[16]QDQEHPSIR
0.1.16228							0	815.322	1628.63	1628.62	0.0130968	TagRecon 1.4.47	2	0.0132608	SC[418]YDLSC[57]HAR
0.1.16235							0	888.091	2661.25	2661.23	0.0236731	TagRecon 1.4.47	3	0.00209781	TSQC[418]SSPSLSASPGSPTRPQIR
0.1.16253							0	721.777	1441.54	1441.52	0.0143204	TagRecon 1.4.47	2	0.00843611	NM[16]MAAC[418]DPR
0.1.16254							0	717.833	2867.3	2867.27	0.0317077	TagRecon 1.4.47	4	0.0173363	VGEVC[57]HITC[418]KPEYAYGSAGSPPK
0.1.16264							0	611.776	1221.54	1221.53	0.00993625	TagRecon 1.4.47	2	0.0106979	LSTAC[418]PGR
0.1.16265							0	586.281	1170.55	1170.53	0.015437	TagRecon 1.4.47	2	0.0130412	HLPGVC[418]K
0.1.16284							0	756.305	1510.6	1510.58	0.0135318	TagRecon 1.4.47	2	0.0138345	DTIC[418]NQDER
0.1.16298							0	881.856	1761.7	1761.69	0.00664217	TagRecon 1.4.47	2	0.00337593	M[16]GITEYNNQC[418]R
0.1.16299							0	527.262	1578.76	1578.75	0.0105519	TagRecon 1.4.47	3	0.00240958	GKDC[418]AVIVTQK
0.1.16317							0	441.888	1322.64	1322.64	0.00629814	TagRecon 1.4.47	3	0.00240788	IKC[418]LATEK
0.1.16350							0	690.803	1379.59	1379.58	0.00559989	TagRecon 1.4.47	2	0.00802758	SLSGSSPC[418]PK
0.1.16409							0	521.208	1560.6	1560.59	0.0104635	TagRecon 1.4.47	3	0.00241045	SGQGAFGNM[16]C[418]R
0.1.16498							0	781.306	1560.6	1560.59	0.00665728	TagRecon 1.4.47	2	0.00309233	SGQGAFGNM[16]C[418]R
0.1.16517							0	598.959	1793.86	1793.84	0.0122964	TagRecon 1.4.47	3	0.00216575	QTEALKC[418]VAQASK
0.1.16519							0	897.933	1793.85	1793.84	0.00813218	TagRecon 1.4.47	2	0.00330768	QTEALKC[418]VAQASK
0.1.16521							0	683.645	2047.91	2047.9	0.0160132	TagRecon 1.4.47	3	0.00173655	IVEDEPNKIC[418]EADR
0.1.16526							0	521.208	1560.6	1560.59	0.0128396	TagRecon 1.4.47	3	0.0047825	SGQGAFGNM[16]C[418]R
0.1.16543							0	551.931	1652.77	1652.76	0.0152254	TagRecon 1.4.47	3	0.00203946	NC[418]PHVVVGTPGR
0.1.16547							0	524.576	1570.71	1570.69	0.015811	TagRecon 1.4.47	3	0.00701806	EYVKC[418]LENR
0.1.16553							0	551.931	1652.77	1652.76	0.0173584	TagRecon 1.4.47	3	0.0020549	NC[418]PHVVVGTPGR
0.1.16559							0	485.23	1452.67	1452.65	0.0142585	TagRecon 1.4.47	3	0.00433879	GTLITHC[418]YK
0.1.16563							0	956.773	2867.3	2867.27	0.0264438	TagRecon 1.4.47	3	0.00187102	VGEVC[418]HITC[57]KPEYAYGSAGSPPK
0.1.16587							0	597.635	1789.88	1789.86	0.023026	TagRecon 1.4.47	3	0.00229172	ALQSLAC[418]GKPTQR
0.1.16589							0	629.291	1884.85	1884.84	0.0124979	TagRecon 1.4.47	3	0.0023418	VC[418]HAHPTLSEAFR
0.1.16596							0	472.222	1884.86	1884.84	0.0183219	TagRecon 1.4.47	4	0.0186284	VC[418]HAHPTLSEAFR
0.1.16598							0	532.944	1595.81	1595.8	0.013492	TagRecon 1.4.47	3	0.00236353	KKPC[418]ITYGLR
0.1.16610							0	703.569	2810.25	2810.23	0.0203434	TagRecon 1.4.47	4	0.0138368	IC[418]ANHYITPM[16]M[16]ELKPNAGSDR
0.1.16612							0	637.598	1909.77	1909.75	0.0182289	TagRecon 1.4.47	3	0.0022042	LFQEC[57]C[418]PHSTDR
0.1.16643							0	955.889	1909.76	1909.75	0.00815405	TagRecon 1.4.47	2	0.00336982	LFQEC[57]C[418]PHSTDR
0.1.16664							0	946.421	2836.24	2836.23	0.0131352	TagRecon 1.4.47	3	0.00136202	KGGSYTQAASSDSAQGSDVSLTAC[418]K
0.1.16665							0	742.328	1482.64	1482.63	0.0109672	TagRecon 1.4.47	2	0.00937588	VLTM[16]PETC[418]R
0.1.16666							0	767.998	2300.97	2300.96	0.014929	TagRecon 1.4.47	3	0.00190399	LEKC[418]GEDDETIPSEYR
0.1.16701							0	484.236	1449.69	1449.67	0.0108438	TagRecon 1.4.47	3	0.00225335	KC[418]AADLGLNK
0.1.16707							0	722.285	1442.56	1442.55	0.0100503	TagRecon 1.4.47	2	0.0191984	M[16]M[16]IPDC[418]QR
0.1.16714							0	731.378	1460.74	1460.73	0.0142076	TagRecon 1.4.47	2	0.00926309	QVLIRPC[418]SK
0.1.16715							0	662.289	1322.56	1322.55	0.00894656	TagRecon 1.4.47	2	0.00857163	ITEFC[418]HR
0.1.16719							0	629.293	1884.86	1884.84	0.0164347	TagRecon 1.4.47	3	0.0021346	VC[418]HAHPTLSEAFR
0.1.16722							0	487.921	1460.74	1460.73	0.0135367	TagRecon 1.4.47	3	0.00811604	QVLIRPC[418]SK
0.1.16726							0	584.613	1750.82	1750.8	0.0159172	TagRecon 1.4.47	3	0.00232338	EVLTEDKC[418]LQR
0.1.16728							0	472.221	1884.86	1884.84	0.0159466	TagRecon 1.4.47	4	0.0198357	VC[418]HAHPTLSEAFR
0.1.16735							0	519.576	1555.71	1555.69	0.0142072	TagRecon 1.4.47	3	0.00226886	TC[418]ILGTHHEK
0.1.16742							0	590.273	2357.06	2357.03	0.0286532	TagRecon 1.4.47	4	0.0195053	KM[16]EDSVGC[418]LETAEEVKR
0.1.16743							0	786.692	2357.05	2357.03	0.0194771	TagRecon 1.4.47	3	0.00225166	KM[16]EDSVGC[418]LETAEEVKR
0.1.16752							0	525.911	1574.71	1574.7	0.0137611	TagRecon 1.4.47	3	0.00397161	TC[418]VQEITAHR
0.1.16770							0	559.617	1675.83	1675.81	0.0226163	TagRecon 1.4.47	3	0.00231358	GLC[418]EKPLASAAAK
0.1.16772							0	613.946	1838.82	1838.79	0.0239554	TagRecon 1.4.47	3	0.002553	SIKDTIC[418]NQDER
0.1.16776							0	666.802	2663.18	2663.14	0.0365582	TagRecon 1.4.47	4	0.0168566	QM[16]EKDETVSDC[418]SPHIANIGR
0.1.16795							0	920.409	1838.8	1838.79	0.00990002	TagRecon 1.4.47	2	0.00237511	SIKDTIC[418]NQDER
0.1.16824							0	888.728	2663.16	2663.14	0.0210334	TagRecon 1.4.47	3	0.00163409	QM[16]EKDETVSDC[418]SPHIANIGR
0.1.16835							0	518.738	1035.46	1035.45	0.00977346	TagRecon 1.4.47	2	0.0100684	TC[418]LGPK
0.1.16851							0	623.795	1245.58	1245.56	0.0127335	TagRecon 1.4.47	2	0.00856785	HITGLC[418]GK
0.1.16857							0	798.35	2392.03	2392	0.0279723	TagRecon 1.4.47	3	0.0018163	TC[57]NTNPHLNALSTDSAC[418]R
0.1.16863							0	819.379	2455.12	2455.1	0.0183023	TagRecon 1.4.47	3	0.0020784	M[16]PC[418]QSLQPEPINTPTHTK
0.1.16879							0	682.81	1363.61	1363.59	0.0149907	TagRecon 1.4.47	2	0.00830993	TSAVPSPC[418]GK
0.1.16889							0	590.281	1767.82	1767.8	0.0210723	TagRecon 1.4.47	3	0.00226112	LLLGNKC[418]DM[16]EAK
0.1.16914							0	481.57	1441.69	1441.67	0.0159072	TagRecon 1.4.47	3	0.00225277	KLYC[418]QELK
0.1.16915							0	536.282	1605.82	1605.8	0.0180901	TagRecon 1.4.47	3	0.00732993	KEC[418]PFVIKPK
0.1.16928							0	473.887	1418.64	1418.62	0.0160881	TagRecon 1.4.47	3	0.00372598	LAPHC[418]SFAR
0.1.16932							0	793.315	1584.62	1584.6	0.0156877	TagRecon 1.4.47	2	0.00940151	EGALC[418]EENM[16]R
0.1.16938							0	698.999	2093.98	2093.96	0.0204252	TagRecon 1.4.47	3	0.00215051	NYLEPGKEC[418]VQPATK
0.1.16951							0	878.402	2632.18	2632.16	0.0223988	TagRecon 1.4.47	3	0.00181179	VGVGTC[418]GIADKPM[16]TQYQDTSK
0.1.16966							0	717.696	2150.07	2150.04	0.0285629	TagRecon 1.4.47	3	0.00208819	LISETTSVC[418]KPEQVAK
0.1.16969							0	701.809	2803.21	2803.18	0.0317672	TagRecon 1.4.47	4	0.0173946	TREEEC[418]HFYAGGQVYPGEASR
0.1.16996							0	702.666	2104.98	2104.96	0.0204027	TagRecon 1.4.47	3	0.00221071	KPNVGC[418]QQDSEELLK
0.1.17003							0	618.785	2471.11	2471.08	0.0309479	TagRecon 1.4.47	4	0.0186881	M[16]EEFKDQLPADEC[418]NKLK
0.1.17012							0	682.811	1363.61	1363.59	0.0175051	TagRecon 1.4.47	2	0.00345558	TSAVPSPC[418]GK
0.1.17013							0	501.927	1502.76	1502.74	0.0203246	TagRecon 1.4.47	3	0.00380397	KC[418]GPNILVNK
0.1.17017							0	784.663	2350.97	2350.95	0.0188798	TagRecon 1.4.47	3	0.0016512	SC[418]SGVEFSTSGHAYTDTGK
0.1.17020							0	646.613	1936.82	1936.8	0.018035	TagRecon 1.4.47	3	0.00214237	WANYHLENAGC[418]NK
0.1.17024							0	603.281	1806.82	1806.8	0.0193416	TagRecon 1.4.47	3	0.0023106	SPNLSKC[418]GEELGR
0.1.17030							0	669.307	1336.6	1336.59	0.0100654	TagRecon 1.4.47	2	0.00977425	ANAC[418]NSVIK
0.1.17038							0	627.968	1880.88	1880.86	0.0164664	TagRecon 1.4.47	3	0.00221748	LTTINC[418]EEGDKLK
0.1.17060							0	641.323	1920.95	1920.94	0.00922838	TagRecon 1.4.47	3	0.00440464	VIRC[418]M[16]TNTPVVVR
0.1.17065							0	623.621	1867.84	1867.83	0.0132918	TagRecon 1.4.47	3	0.00384131	LTDC[418]VVM[16]RDPASK
0.1.17069							0	610.259	2437.01	2436.99	0.0194465	TagRecon 1.4.47	4	0.0177698	M[16]TNHC[418]VFSANEDHETIR
0.1.17104							0	508.221	1521.64	1521.64	0.00269444	TagRecon 1.4.47	3	0.00276653	VDTC[418]HTPFGK
0.1.17110							0	813.339	2437	2436.99	0.00706668	TagRecon 1.4.47	3	0.00178536	M[16]TNHC[418]VFSANEDHETIR
0.1.17129							0	751.403	1500.79	1500.78	0.00753457	TagRecon 1.4.47	2	0.00330319	IC[418]SKPVVLPK
0.1.17136							0	537.249	1608.73	1608.72	0.00762064	TagRecon 1.4.47	3	0.00235076	FAC[418]HSASLTVR
0.1.17150							0	805.368	1608.72	1608.72	0.00429244	TagRecon 1.4.47	2	0.00837562	FAC[418]HSASLTVR
0.1.17156							0	450.903	1349.69	1349.68	0.00288657	TagRecon 1.4.47	3	0.00235939	KIC[418]AVGITK
0.1.17157							0	675.851	1349.69	1349.68	0.00365627	TagRecon 1.4.47	2	0.003075	KIC[418]AVGITK
0.1.17169							0	670.633	2008.88	2008.87	0.00458806	TagRecon 1.4.47	3	0.0021139	KGDSNANSDVC[418]AAALR
0.1.17174							0	526.942	1577.8	1577.79	0.0094093	TagRecon 1.4.47	3	0.00233515	LLIEKC[418]NTVK
0.1.17185							0	789.908	1577.8	1577.79	0.00703183	TagRecon 1.4.47	2	0.01034	LLIEKC[418]NTVK
0.1.17186							0	749.848	1497.68	1497.67	0.00636059	TagRecon 1.4.47	2	0.00329252	IAVAAQNC[418]YK
0.1.17212							0	508.91	1523.71	1523.7	0.00750207	TagRecon 1.4.47	3	0.00349274	RFC[418]PSIQGAK
0.1.17229							0	545.93	1634.77	1634.75	0.0134263	TagRecon 1.4.47	3	0.00232483	GLDVNKC[418]EIAR
0.1.17236							0	639.794	1277.57	1277.56	0.0098909	TagRecon 1.4.47	2	0.00332592	VAGINAC[418]GR
0.1.17258							0	846.716	2537.12	2537.1	0.0221935	TagRecon 1.4.47	3	0.00202364	KYEDIC[418]PSTHNM[16]DVPNIK
0.1.17261							0	879.392	1756.77	1756.75	0.0139455	TagRecon 1.4.47	2	0.00292629	YLAEVAC[418]GDDRK
0.1.17272							0	488.236	1461.69	1461.67	0.0112537	TagRecon 1.4.47	3	0.00229967	SC[418]GLHVTSIK
0.1.17286							0	685.821	1369.63	1369.62	0.0115429	TagRecon 1.4.47	2	0.00327827	AKFENLC[418]K
0.1.17297							0	700.827	1399.64	1399.63	0.0132525	TagRecon 1.4.47	2	0.00321232	TKFENLC[418]K
0.1.17308							0	609.604	1825.79	1825.78	0.0127885	TagRecon 1.4.47	3	0.00211339	SYC[418]AEIAHNVSSK
0.1.17318							0	467.552	1399.63	1399.63	0.00767397	TagRecon 1.4.47	3	0.00222491	TKFENLC[418]K
0.1.17322							0	503.57	1507.69	1507.68	0.00832821	TagRecon 1.4.47	3	0.00237457	NC[418]LALADDKK
0.1.17339							0	913.897	1825.78	1825.78	0.00354358	TagRecon 1.4.47	2	0.00282426	SYC[418]AEIAHNVSSK
0.1.17340							0	1092.52	2183.03	2183.03	0.00887875	TagRecon 1.4.47	2	0.00189278	EIVHLQAGQC[418]GNQIGAK
0.1.17345							0	754.849	1507.68	1507.68	0.00380684	TagRecon 1.4.47	2	0.00869453	NC[418]LALADDKK
0.1.17362							0	648.296	1294.58	1294.57	0.00966025	TagRecon 1.4.47	2	0.00337537	GC[418]EVVVSGK
0.1.17384							0	642.297	1923.87	1923.86	0.00873676	TagRecon 1.4.47	3	0.00211498	YSNSALGHVNC[418]TIK
0.1.17391							0	563.262	1124.51	1124.5	0.00904403	TagRecon 1.4.47	2	0.0138277	LGSISC[418]K
0.1.17405							0	962.94	1923.87	1923.86	0.00509594	TagRecon 1.4.47	2	0.00238822	YSNSALGHVNC[418]TIK
0.1.17435							0	728.69	2183.05	2183.03	0.023538	TagRecon 1.4.47	3	0.00213552	EIVHLQAGQC[418]GNQIGAK
0.1.17459							0	514.919	1541.74	1541.72	0.0123588	TagRecon 1.4.47	3	0.00342649	AVAILC[418]NHQR
0.1.17469							0	668.311	1334.61	1334.6	0.00693661	TagRecon 1.4.47	2	0.00799893	LSQEC[418]PIK
0.1.17473							0	770.336	1538.66	1538.65	0.00790958	TagRecon 1.4.47	2	0.00304672	SGSAAQAEGLC[418]K
0.1.17479							0	771.874	1541.73	1541.72	0.0102078	TagRecon 1.4.47	2	0.0032189	AVAILC[418]NHQR
0.1.17486							0	573.254	1716.74	1716.73	0.0114632	TagRecon 1.4.47	3	0.00230899	KC[418]PFYAAEQDK
0.1.17490							0	1092.52	2183.03	2183.03	0.00838464	TagRecon 1.4.47	2	0.00228155	EIVHLQAGQC[418]GNQIGAK
0.1.17491							0	859.372	1716.73	1716.73	0.00118301	TagRecon 1.4.47	2	0.00336503	KC[418]PFYAAEQDK
0.1.17495							0	627.783	1253.55	1253.54	0.00872583	TagRecon 1.4.47	2	0.0138855	LESGSIC[418]K
0.1.17517							0	642.297	1923.87	1923.86	0.00966167	TagRecon 1.4.47	3	0.00193289	YSNSALGHVNC[418]TIK
0.1.17535							0	962.938	1923.86	1923.86	0.00117778	TagRecon 1.4.47	2	0.0026378	YSNSALGHVNC[418]TIK
0.1.17556							0	728.683	2183.03	2183.03	0.00265117	TagRecon 1.4.47	3	0.00180853	EIVHLQAGQC[418]GNQIGAK
0.1.17581							0	668.309	1334.6	1334.6	0.00353775	TagRecon 1.4.47	2	0.00346327	LSQEC[418]PIK
0.1.17594							0	573.253	1716.74	1716.73	0.0108872	TagRecon 1.4.47	3	0.00237717	KC[418]PFYAAEQDK
0.1.17598							0	859.373	1716.73	1716.73	0.00349058	TagRecon 1.4.47	2	0.0031314	KC[418]PFYAAEQDK
0.1.17614							0	556.603	1666.79	1666.77	0.0173012	TagRecon 1.4.47	3	0.00218514	NC[418]PHIVVGTPGR
0.1.17630							0	561.613	1681.82	1681.81	0.0115466	TagRecon 1.4.47	3	0.00209552	LPLVTPHTQC[418]R
0.1.17634							0	834.399	1666.78	1666.77	0.0130372	TagRecon 1.4.47	2	0.0112309	NC[418]PHIVVGTPGR
0.1.17669							0	610.298	1827.87	1827.86	0.0149236	TagRecon 1.4.47	3	0.0022299	LLEKC[418]AM[16]TALSSK
0.1.17674							0	728.688	2183.04	2183.03	0.0172767	TagRecon 1.4.47	3	0.00217211	EIVHLQAGQC[418]GNQIGAK
0.1.17684							0	800.851	1599.69	1599.68	0.00707119	TagRecon 1.4.47	2	0.00317314	IINDNATYC[418]R
0.1.17702							0	986.932	1971.85	1971.84	0.0115255	TagRecon 1.4.47	2	0.0028874	SC[418]M[16]LTGTPESVQSAK
0.1.17719							0	534.238	1599.69	1599.68	0.0109474	TagRecon 1.4.47	3	0.00358361	IINDNATYC[418]R
0.1.17720							0	635.337	1902.99	1902.97	0.0193127	TagRecon 1.4.47	3	0.00220569	RVC[418]EEIAIIPSKK
0.1.17735							0	629.967	1886.88	1886.86	0.0224515	TagRecon 1.4.47	3	0.00233264	FC[418]AGNPGNQALLHK
0.1.17761							0	762.849	1523.68	1523.67	0.0091389	TagRecon 1.4.47	2	0.00993767	INSITVDNC[418]K
0.1.17791							0	559.93	1676.77	1676.76	0.013488	TagRecon 1.4.47	3	0.00227529	ALRPGDPGFC[418]AR
0.1.17822							0	800.85	1599.69	1599.68	0.00408192	TagRecon 1.4.47	2	0.018607	IINDNATYC[418]R
0.1.17990							0	667.309	1332.6	1332.6	0.00877128	TagRecon 1.4.47	2	0.0103514	AQC[418]PIVER
0.1.18143							0	805.361	1608.71	1608.7	0.00549636	TagRecon 1.4.47	2	0.00324241	VIGSGC[418]NLDSAR
0.1.18253							0	523.925	1568.75	1568.75	0.00615849	TagRecon 1.4.47	3	0.00478233	VVHC[418]QPLDLK
0.1.18266							0	620.286	1857.84	1857.83	0.0117699	TagRecon 1.4.47	3	0.00215275	NALANQSDC[418]VLHR
0.1.18274							0	929.92	1857.83	1857.83	0.000333538	TagRecon 1.4.47	2	0.00277845	NALANQSDC[418]VLHR
0.1.18286							0	665.782	1329.55	1329.55	0.0020616	TagRecon 1.4.47	2	0.00924413	LTEGC[418]SFR
0.1.18287							0	553.01	2208.01	2208	0.013615	TagRecon 1.4.47	4	0.0187004	NPPELIGVHC[418]THGFNR
0.1.18295							0	737.01	2208.01	2208	0.00831607	TagRecon 1.4.47	3	0.00185702	NPPELIGVHC[418]THGFNR
0.1.18330							0	563.267	1686.78	1686.77	0.00605658	TagRecon 1.4.47	3	0.00395913	IIYGGSVTGATC[418]K
0.1.18353							0	765.355	3057.39	3057.38	0.0130231	TagRecon 1.4.47	4	0.0159146	M[16]EEFKDQLPADEC[418]NKLKEEISK
0.1.18366							0	830.842	1659.67	1659.66	0.0102382	TagRecon 1.4.47	2	0.00321985	GSQFGQSC[418]C[57]LR
0.1.18382							0	589.956	1766.85	1766.84	0.00524619	TagRecon 1.4.47	3	0.00348972	IM[16]EKC[418]TLPLTGK
0.1.18383							0	583.263	1164.51	1164.51	0.00531086	TagRecon 1.4.47	2	0.0190719	AAC[418]DLVR
0.1.18409							0	744.856	1487.7	1487.69	0.00800276	TagRecon 1.4.47	2	0.00857496	AVDALLTHC[418]K
0.1.18417							0	496.906	1487.7	1487.69	0.00739089	TagRecon 1.4.47	3	0.00234828	AVDALLTHC[418]K
0.1.18420							0	855.847	1709.68	1709.67	0.013296	TagRecon 1.4.47	2	0.00266967	HC[418]LLTC[57]EEC[57]K
0.1.18421							0	564.585	1690.73	1690.72	0.00989853	TagRecon 1.4.47	3	0.00555969	DPHLAC[418]VAYER
0.1.18422							0	483.915	1448.72	1448.72	0.00790693	TagRecon 1.4.47	3	0.00219784	LQIELGKC[418]K
0.1.18429							0	725.368	1448.72	1448.72	0.00592994	TagRecon 1.4.47	2	0.0098615	LQIELGKC[418]K
0.1.18440							0	640.318	1278.62	1278.61	0.0114023	TagRecon 1.4.47	2	0.00328444	LAAVVSAC[418]K
0.1.18450							0	547.265	1638.77	1638.76	0.00904114	TagRecon 1.4.47	3	0.00301768	KC[418]PFTGNVSIR
0.1.18459							0	741	2219.98	2219.96	0.0127937	TagRecon 1.4.47	3	0.00220355	QTPNDLTGEHSC[418]IM[16]LK
0.1.18461							0	596.279	1785.81	1785.8	0.0169221	TagRecon 1.4.47	3	0.00237406	FTFIEKC[418]NNPR
0.1.18471							0	846.375	1690.73	1690.72	0.0116488	TagRecon 1.4.47	2	0.00845754	DPHLAC[418]VAYER
0.1.18484							0	820.393	1638.77	1638.76	0.00675031	TagRecon 1.4.47	2	0.00818537	KC[418]PFTGNVSIR
0.1.18488							0	750.689	2249.04	2249.03	0.0093237	TagRecon 1.4.47	3	0.00199428	KLEEEQIILEDQNC[418]K
0.1.18526							0	1125.53	2249.04	2249.03	0.0104939	TagRecon 1.4.47	2	0.00179705	KLEEEQIILEDQNC[418]K
0.1.18535							0	776.867	3103.44	3103.41	0.0241234	TagRecon 1.4.47	4	0.0103931	TNHIGHTGYLNTVTVSPDGSLC[418]ASGGK
0.1.18536							0	607.315	1818.92	1818.91	0.0125055	TagRecon 1.4.47	3	0.00221764	VKC[418]LNNLAASQLK
0.1.18541							0	758.874	1515.73	1515.72	0.011983	TagRecon 1.4.47	2	0.00317164	IVGPSGAAVPC[418]K
0.1.18546							0	787.881	1573.75	1573.74	0.0092324	TagRecon 1.4.47	2	0.0106097	GLC[418]GAIHSSIAK
0.1.18560							0	564.281	1689.82	1689.8	0.0236495	TagRecon 1.4.47	3	0.00228702	KPASQC[418]VLDGVR
0.1.18569							0	547.268	1638.78	1638.76	0.0176487	TagRecon 1.4.47	3	0.00232335	KC[418]PFTGNVSIR
0.1.18570							0	707.009	2118	2117.99	0.0173294	TagRecon 1.4.47	3	0.0020708	SQQSKPQDASC[418]LPALK
0.1.18571							0	555.934	1664.78	1664.77	0.0153591	TagRecon 1.4.47	3	0.00442921	SVC[418]LIGDKEQR
0.1.18576							0	604.785	1207.56	1207.55	0.008623	TagRecon 1.4.47	2	0.00850387	GTAVAIC[418]R
0.1.18578							0	830.384	1658.75	1658.75	-0.000492148	TagRecon 1.4.47	2	0.00318791	AAAPAPVSEAVC[418]R
0.1.18586							0	833.394	1664.77	1664.77	0.00875326	TagRecon 1.4.47	2	0.00950569	SVC[418]LIGDKEQR
0.1.18589							0	506.251	1515.73	1515.72	0.00885638	TagRecon 1.4.47	3	0.00238773	IVGPSGAAVPC[418]K
0.1.18599							0	726.364	1450.71	1450.71	0.00809907	TagRecon 1.4.47	2	0.0196512	KGC[418]VITISGR
0.1.18612							0	750.691	2249.05	2249.03	0.0166822	TagRecon 1.4.47	3	0.00190073	KLEEEQIILEDQNC[418]K
0.1.18742							0	653.323	1304.63	1304.63	0.0048812	TagRecon 1.4.47	2	0.00318413	VC[418]NPIITK
0.1.18744							0	612.794	1223.57	1223.57	0.00511766	TagRecon 1.4.47	2	0.00810515	VSSVALC[418]K
0.1.18748							0	771.372	1540.73	1540.73	0.00207692	TagRecon 1.4.47	2	0.00297664	GC[418]HLLVATPGR
0.1.18750							0	514.587	1540.74	1540.73	0.0100054	TagRecon 1.4.47	3	0.00221178	GC[418]HLLVATPGR
0.1.18753							0	573.948	1718.82	1718.81	0.00878644	TagRecon 1.4.47	3	0.00209001	VAASPEDIKLC[418]R
0.1.18767							0	921.914	1841.81	1841.81	0.00608301	TagRecon 1.4.47	2	0.00320513	SQIC[418]DNAALYAQK
0.1.18772							0	932.374	1862.73	1862.73	0.0058286	TagRecon 1.4.47	2	0.00829369	SSVNC[418]PFSSQDM[16]K
0.1.18803							0	621.919	1862.73	1862.73	0.00633032	TagRecon 1.4.47	3	0.00980209	SSVNC[418]PFSSQDM[16]K
0.1.18830							0	672.651	2014.93	2014.92	0.00644631	TagRecon 1.4.47	3	0.00181466	APSVANVGSHC[418]DLSLK
0.1.18844							0	593.263	1776.77	1776.76	0.007281	TagRecon 1.4.47	3	0.00227104	GDAHEC[418]FVSPVAK
0.1.18847							0	653.323	1304.63	1304.63	0.00613552	TagRecon 1.4.47	2	0.0030763	VC[418]NPIITK
0.1.18852							0	514.586	1540.73	1540.73	0.00694452	TagRecon 1.4.47	3	0.00216963	GC[418]HLLVATPGR
0.1.18859							0	1008.47	2014.92	2014.92	-0.00222778	TagRecon 1.4.47	2	0.00304389	APSVANVGSHC[418]DLSLK
0.1.18871							0	531.242	1590.71	1590.7	0.00978305	TagRecon 1.4.47	3	0.00294354	AHVVPC[418]FDASK
0.1.18876							0	932.374	1862.73	1862.73	0.00523059	TagRecon 1.4.47	2	0.00342955	SSVNC[418]PFSSQDM[16]K
0.1.18916							0	585.944	1754.81	1754.8	0.0118204	TagRecon 1.4.47	3	0.00473554	GHNQPC[418]LLVGSGR
0.1.18923							0	575.585	1723.73	1723.73	0.00539608	TagRecon 1.4.47	3	0.00230454	NM[16]SVHLSPC[418]FR
0.1.18950							0	590.27	1178.52	1178.52	0.00344226	TagRecon 1.4.47	2	0.0100077	EVAALC[418]R
0.1.18970							0	862.872	1723.73	1723.73	0.00323497	TagRecon 1.4.47	2	0.00810959	NM[16]SVHLSPC[418]FR
0.1.18978							0	531.242	1590.71	1590.7	0.00964	TagRecon 1.4.47	3	0.00455231	AHVVPC[418]FDASK
0.1.18989							0	623.638	1867.89	1867.88	0.00944618	TagRecon 1.4.47	3	0.00370973	ERPLC[418]PLQPQNR
0.1.18992							0	478.555	1432.64	1432.64	0.00556428	TagRecon 1.4.47	3	0.00240776	FSVPHVC[418]AR
0.1.18993							0	699.288	2094.84	2094.83	0.011682	TagRecon 1.4.47	3	0.00213651	C[57]C[57]LTYC[418]FNKPEDK
0.1.18994							0	586.252	1170.49	1170.48	0.00564567	TagRecon 1.4.47	2	0.0153879	FENLC[418]K
0.1.19007							0	605.934	1814.78	1814.77	0.00954549	TagRecon 1.4.47	3	0.00823547	NLETFC[418]EETRR
0.1.19030							0	796.873	1591.73	1591.72	0.00861587	TagRecon 1.4.47	2	0.00285472	NNTQVLINC[418]R
0.1.19033							0	788.869	1575.72	1575.72	0.00651255	TagRecon 1.4.47	2	0.00845896	ALVDGPC[418]TQVR
0.1.19043							0	750.346	1498.68	1498.67	0.00710682	TagRecon 1.4.47	2	0.00422996	KC[418]TLDQAFR
0.1.19045							0	595.263	1782.77	1782.76	0.00674719	TagRecon 1.4.47	3	0.0046693	QNTYC[418]FPHSLR
0.1.19073							0	520.588	1558.74	1558.73	0.0106551	TagRecon 1.4.47	3	0.00453676	FC[418]LSKPGVYK
0.1.19077							0	593.267	1776.78	1776.77	0.0118357	TagRecon 1.4.47	3	0.00231407	LLEC[418]HFM[16]PPEK
0.1.19078							0	628.627	1882.86	1882.84	0.0135849	TagRecon 1.4.47	3	0.00164476	SGGATIEELTEKC[418]K
0.1.19079							0	652.616	1954.83	1954.81	0.0126818	TagRecon 1.4.47	3	0.00221216	NC[418]LTNFHGM[16]DLTR
0.1.19085							0	834.73	2501.17	2501.16	0.0122627	TagRecon 1.4.47	3	0.00150821	TC[418]TTVAFTQVNSEDKGALAK
0.1.19095							0	531.585	1591.73	1591.72	0.0099339	TagRecon 1.4.47	3	0.00231531	NNTQVLINC[418]R
0.1.19106							0	978.417	1954.82	1954.81	0.00771661	TagRecon 1.4.47	2	0.0085164	NC[418]LTNFHGM[16]DLTR
0.1.19110							0	739.354	1476.69	1476.69	0.00757034	TagRecon 1.4.47	2	0.00335282	NIC[418]QQVNIK
0.1.19154							0	796.873	1591.73	1591.72	0.0084301	TagRecon 1.4.47	2	0.00320672	NNTQVLINC[418]R
0.1.19161							0	636.794	1271.57	1271.57	0.00599545	TagRecon 1.4.47	2	0.0092787	VC[418]ASVTFK
0.1.19176							0	767.382	2299.12	2299.11	0.0144768	TagRecon 1.4.47	3	0.00147451	KPVSTTNLQDPGVLGC[418]PR
0.1.19188							0	516.93	1547.77	1547.76	0.00890311	TagRecon 1.4.47	3	0.00233152	RC[418]AVGLVDAVK
0.1.19201							0	533.588	1597.74	1597.73	0.0135161	TagRecon 1.4.47	3	0.00230034	VAC[418]IGAWHPAR
0.1.19221							0	799.877	1597.74	1597.73	0.0121351	TagRecon 1.4.47	2	0.00792693	VAC[418]IGAWHPAR
0.1.19237							0	847.907	1693.8	1693.79	0.00775293	TagRecon 1.4.47	2	0.00302991	TLIQNC[418]GASTIR
0.1.19262							0	803.38	2407.12	2407.09	0.0249729	TagRecon 1.4.47	3	0.001857	INQVFHGSC[418]ITEGNELTK
0.1.19276							0	583.301	1746.88	1746.87	0.0127168	TagRecon 1.4.47	3	0.00225333	VC[418]EEIAIIPSKK
0.1.19282							0	816.862	1631.71	1631.7	0.0130416	TagRecon 1.4.47	2	0.00318555	TTQFSC[418]TLGEK
0.1.19292							0	663.81	1325.61	1325.59	0.0165835	TagRecon 1.4.47	2	0.00957905	LGYTPVC[418]R
0.1.19299							0	589.314	1764.92	1764.91	0.0133454	TagRecon 1.4.47	3	0.00235744	SKKC[418]PFIVALNK
0.1.19317							0	625.617	1873.83	1873.82	0.0122042	TagRecon 1.4.47	3	0.00202341	EM[16]NPALGIDC[418]LHK
0.1.19332							0	585.293	1752.86	1752.84	0.0126227	TagRecon 1.4.47	3	0.00217044	VVLDNIHGC[418]PLR
0.1.19336							0	877.429	1752.84	1752.84	-0.000100773	TagRecon 1.4.47	2	0.00310092	VVLDNIHGC[418]PLR
0.1.19358							0	720.317	1438.62	1438.61	0.00789981	TagRecon 1.4.47	2	0.0105004	IGNC[418]PFSQR
0.1.19498							0	592.633	1774.88	1774.87	0.00294521	TagRecon 1.4.47	3	0.00205396	RVC[418]EEIAIIPSK
0.1.19513							0	536.274	1605.8	1605.79	0.00989202	TagRecon 1.4.47	3	0.00211393	AVLGEVKLC[418]EK
0.1.19517							0	723.996	2168.97	2168.97	0.000916881	TagRecon 1.4.47	3	0.00229525	DKFNEC[418]GHVLYADIK
0.1.19533							0	661.643	1981.91	1981.91	0.000112809	TagRecon 1.4.47	3	0.00236242	YKVC[418]NYGLTFTQK
0.1.19542							0	825.862	1649.71	1649.71	0.0013455	TagRecon 1.4.47	2	0.00340433	NLSGQPNFPC[418]R
0.1.19553							0	991.962	1981.91	1981.91	0.00262	TagRecon 1.4.47	2	0.00305861	YKVC[418]NYGLTFTQK
0.1.19558							0	664.302	1326.59	1326.58	0.00378477	TagRecon 1.4.47	2	0.0188766	SC[418]QFVAVR
0.1.19564							0	491.245	1470.71	1470.71	0.00201103	TagRecon 1.4.47	3	0.0107476	HQAC[418]LLLQK
0.1.19570							0	595.967	1784.88	1784.87	0.00961194	TagRecon 1.4.47	3	0.00214125	RPGAALDPGC[418]VLAK
0.1.19581							0	554.273	1659.8	1659.79	0.0109544	TagRecon 1.4.47	3	0.0022935	TSC[418]ALTIHAIGR
0.1.19607							0	699.988	2096.94	2096.94	0.000854231	TagRecon 1.4.47	3	0.00193935	KDC[418]EVVM[16]M[16]IGLPGAGK
0.1.19612							0	836.376	1670.74	1670.75	-0.0177413	TagRecon 1.4.47	2	0.00336925	FIC[418]TTSAIQNR
0.1.19631							0	1049.48	2096.94	2096.94	0.00333991	TagRecon 1.4.47	2	0.00808176	KDC[418]EVVM[16]M[16]IGLPGAGK
0.1.19634							0	825.864	1649.71	1649.71	0.00612248	TagRecon 1.4.47	2	0.00333246	NLSGQPNFPC[418]R
0.1.19645							0	747.363	1492.71	1492.71	0.00565707	TagRecon 1.4.47	2	0.00301098	LPSALTATAC[418]K
0.1.19677							0	642.959	1925.85	1925.84	0.0106895	TagRecon 1.4.47	3	0.0023237	FNEC[418]GHVLYADIK
0.1.19700							0	660.337	1318.66	1318.65	0.00650961	TagRecon 1.4.47	2	0.00944528	VIIVQAC[418]R
0.1.19704							0	750.837	1499.66	1499.65	0.00547804	TagRecon 1.4.47	2	0.00333488	GC[418]TATLGNFAK
0.1.19710							0	672.659	2014.96	2014.94	0.0197319	TagRecon 1.4.47	3	0.00222594	IGDLAC[418]ANIQHLSSR
0.1.19712							0	875.722	2624.14	2624.13	0.0148609	TagRecon 1.4.47	3	0.00188204	IFC[57]C[418]HGGLSPDLQSM[16]EQIR
0.1.19715							0	648.304	1941.89	1941.88	0.0142063	TagRecon 1.4.47	3	0.00210193	KVFANPEDC[418]VAFGK
0.1.19717							0	971.95	1941.89	1941.88	0.0110226	TagRecon 1.4.47	2	0.00305264	KVFANPEDC[418]VAFGK
0.1.19730							0	717.865	1433.71	1433.7	0.00999473	TagRecon 1.4.47	2	0.00344789	KC[418]DLISIPK
0.1.19733							0	746.859	1491.7	1491.7	0.00795897	TagRecon 1.4.47	2	0.00340507	QLAALNC[418]SVR
0.1.19743							0	1008.48	2014.95	2014.94	0.0121939	TagRecon 1.4.47	2	0.0091522	IGDLAC[418]ANIQHLSSR
0.1.19744							0	478.912	1433.72	1433.7	0.0108524	TagRecon 1.4.47	3	0.00228899	KC[418]DLISIPK
0.1.19745							0	604.288	1206.56	1206.55	0.00956208	TagRecon 1.4.47	2	0.0198004	VC[418]ADLIR
0.1.19753							0	669.077	2672.28	2672.25	0.0315511	TagRecon 1.4.47	4	0.0195992	IC[418]NAVSPDKDVDGFHVINVGR
0.1.19760							0	585.262	1168.51	1168.5	0.00458184	TagRecon 1.4.47	2	0.0100604	SPFAVC[418]K
0.1.19780							0	660.261	1977.76	1977.74	0.0179635	TagRecon 1.4.47	3	0.00335618	DLNYC[418]FSGM[16]SDHR
0.1.19786							0	806.859	1611.7	1611.69	0.0144699	TagRecon 1.4.47	2	0.00953844	GVLM[16]YGPPGC[418]GK
0.1.19800							0	599.282	1794.82	1794.81	0.0173911	TagRecon 1.4.47	3	0.00215814	VLSLNFSEC[418]HTK
0.1.19801							0	519.925	1556.75	1556.74	0.0152299	TagRecon 1.4.47	3	0.00228925	SLTIAEFKC[418]K
0.1.19807							0	594.271	1779.79	1779.77	0.0197695	TagRecon 1.4.47	3	0.00215931	GTLTLC[418]PYHSDR
0.1.19808							0	627.967	1880.88	1880.86	0.0196672	TagRecon 1.4.47	3	0.00220728	VAHVEVAPFYTC[418]K
0.1.19810							0	989.887	1977.76	1977.74	0.0140633	TagRecon 1.4.47	2	0.00983522	DLNYC[418]FSGM[16]SDHR
0.1.19811							0	490.236	1467.69	1467.68	0.0124701	TagRecon 1.4.47	3	0.00240007	GRLC[418]FEGLR
0.1.19821							0	771.337	1540.66	1540.64	0.0150146	TagRecon 1.4.47	2	0.00303788	GALEGSSC[418]PFR
0.1.19823							0	890.899	1779.78	1779.77	0.0130155	TagRecon 1.4.47	2	0.00798844	GTLTLC[418]PYHSDR
0.1.19834							0	537.935	1610.78	1610.77	0.0128003	TagRecon 1.4.47	3	0.00227067	LLEC[418]PHLNVR
0.1.19836							0	1007.46	2012.91	2012.9	0.0124443	TagRecon 1.4.47	2	0.00300917	TSESLC[418]QNNM[16]VILK
0.1.19843							0	671.983	2012.93	2012.9	0.025919	TagRecon 1.4.47	3	0.00689582	TSESLC[418]QNNM[16]VILK
0.1.19848							0	639.31	1276.61	1276.59	0.0109973	TagRecon 1.4.47	2	0.0099174	QLPSLAC[418]K
0.1.19858							0	806.399	1610.78	1610.77	0.01282	TagRecon 1.4.47	2	0.00988076	LLEC[418]PHLNVR
0.1.19865							0	645.806	1289.6	1289.59	0.0069059	TagRecon 1.4.47	2	0.00964918	LEVVPGC[418]R
0.1.19874							0	582.941	1745.8	1745.79	0.00855537	TagRecon 1.4.47	3	0.00238233	HEC[418]M[16]APLTALVK
0.1.19893							0	934.941	1867.87	1867.86	0.0083401	TagRecon 1.4.47	2	0.00321004	VIQC[418]FAETGQVQK
0.1.19947							0	547.774	1093.53	1093.53	0.00257649	TagRecon 1.4.47	2	0.00917091	IC[418]IVTK
0.1.19948							0	751.866	1501.72	1501.71	0.0114841	TagRecon 1.4.47	2	0.0032734	SLHDALC[418]VVK
0.1.19955							0	537.933	1610.78	1610.77	0.0073633	TagRecon 1.4.47	3	0.00225393	LLEC[418]PHLNVR
0.1.19961							0	563.285	1686.83	1686.82	0.0121799	TagRecon 1.4.47	3	0.00237782	LC[418]SGVLGTVVHGK
0.1.19999							0	937.474	2809.4	2809.39	0.0102543	TagRecon 1.4.47	3	0.00179568	IVGPSGAAVPC[418]KVEPGLGADNSVVR
0.1.20030							0	525.938	1574.79	1574.78	0.00872025	TagRecon 1.4.47	3	0.00232121	LLKPEC[418]VLDK
0.1.20045							0	603.789	1205.56	1205.56	0.00674067	TagRecon 1.4.47	2	0.0155697	SC[418]LPQIK
0.1.20058							0	750.375	2248.1	2248.09	0.0136469	TagRecon 1.4.47	3	0.00174577	VRPC[418]VVYGGADIGQQIR
0.1.20088							0	757.366	2269.08	2269.06	0.0138149	TagRecon 1.4.47	3	0.00204252	AGKPVIC[418]ATQM[16]LESM[16]IK
0.1.20122							0	684.813	1367.61	1367.6	0.00758672	TagRecon 1.4.47	2	0.00299774	SC[418]NC[57]LLLK
0.1.20174							0	1037.43	2072.85	2072.84	0.0100174	TagRecon 1.4.47	2	0.00618896	M[16]EDSVGC[418]LETAEEVK
0.1.20182							0	771.844	1541.67	1541.66	0.00828149	TagRecon 1.4.47	2	0.0191905	AAGC[418]DFTNVVK
0.1.20183							0	616.608	1846.8	1846.79	0.0156057	TagRecon 1.4.47	3	0.00723394	DSNNLC[418]LHFNPR
0.1.20188							0	847.37	2539.09	2539.07	0.0153994	TagRecon 1.4.47	3	0.00163175	GPQLFHM[16]DPSGTFVQC[418]DAR
0.1.20190							0	767.361	2299.06	2299.04	0.0204272	TagRecon 1.4.47	3	0.00184723	GFIKDC[418]PSGQLDAAGFQK
0.1.20192							0	537.775	2147.07	2147.06	0.015167	TagRecon 1.4.47	4	0.0185222	LC[418]HIAFHVPAGQPLAR
0.1.20203							0	904.79	2711.35	2711.33	0.0212512	TagRecon 1.4.47	3	0.00178042	LQETLSAADRC[418]GAALAGHQLIR
0.1.20209							0	620.991	1859.95	1859.93	0.0227577	TagRecon 1.4.47	3	0.0103542	AGVTC[418]IVLPAENKK
0.1.20210							0	757.366	2269.08	2269.06	0.0149585	TagRecon 1.4.47	3	0.00188869	AGKPVIC[418]ATQM[16]LESM[16]IK
0.1.20214							0	724.862	1447.71	1447.7	0.0138019	TagRecon 1.4.47	2	0.0168967	LIIVEGC[418]QR
[truncated: 2,758 more rows]

## Sheet: Peptide View
Sequence	Filtered Spectra	Monoisotopic Mass	Molecular Weight	Protein Accessions
AAVEEGIVLGGGC[418]ALLR (+2)	11	2045.01	2046.03	NP_002147.2|,NP_955472.1|
IISNASC[418]TTNC[57]LAPLAK (+3)	9	2194.02	2195.17	NP_002037.2|,NP_001243728.1|
FC[418]PFAER (+2)	9	1286.52	868.999	NP_004823.1|,NP_001177931.1|,NP_001177932.1|
AAVEEGIVLGGGC[418]ALLR (+3)	8	2045.01	2046.03	NP_002147.2|,NP_955472.1|
EIVHLQAGQC[418]GNQIGAK (+3)	8	2183.03	2184.12	NP_006078.2|,NP_006079.1|
LLEC[418]PHLNVR (+3)	7	1610.77	1611.55	NP_078934.3|
RPVFPPLC[418]GDGLLSGK (+3)	6	2073.02	2074.09	NP_064528.1|
IAILTC[418]PFEPPKPK (+3)	6	1971	1972.04	NP_036205.1|
VPFC[57]LQSC[418]VKPLK (+3)	6	1935.94	1936.99	NP_055720.3|,NP_001243239.1|
GNPVPILIPC[418]HR (+3)	6	1732.85	1733.72	NP_002403.2|
AVLC[418]PPPVK (+2)	6	1340.66	1341.3	NP_008839.2|,NP_061485.1|,NP_005043.1|
SGDAAIVDM[16]VPGKPM[16]C[418]VESFSDYPPLGR (+3)	5	3387.49	3389.46	NP_001393.1|
IISNASC[418]TTNC[57]LAPLAK (+2)	5	2194.02	2195.17	NP_002037.2|,NP_001243728.1|
M[16]RPGVAC[418]SVSQAQK (+3)	5	1894.85	1895.84	NP_000652.2|,NP_001020092.1|
PM[16]C[418]IPPSYADLGK (+2)	5	1824.79	1825.78	NP_003366.2|,NP_001171752.1|
NM[16]M[16]AAC[418]DPR (+2)	5	1457.52	1008.2	NP_006078.2|,NP_115914.1|,NP_821133.1|,NP_817124.1|,NP_821080.1|,NP_006079.1|,NP_001060.1|,NP_006077.2|,NP_001184110.1|
IIPGFM[16]C[418]QGGDFTR (+2)	5	1974.84	1975.92	NP_001157733.1|,NP_001157734.1|,NP_066953.1|,NP_839944.1|,NP_001137355.1|,NP_001129261.1|,NP_001137504.1|,XP_001718975.3|,XP_372741.4|,XP_003846538.1|,XP_003846552.1|,XP_003846565.1|
AEVSELKC[418]GDLEEELKNVTNNLK (+4)	4	2992.42	2993.97	NP_003281.1|,NP_001138632.1|
SGDAAIVDM[16]VPGKPM[16]C[418]VESFSDYPPLGR (+4)	4	3387.49	3389.46	NP_001393.1|
DGNASGTTLLEALDC[418]ILPPTRPTDKPLR (+4)	4	3381.67	3383.47	NP_001393.1|
AYHEQLSVAEITNAC[418]FEPANQM[16]VK (+3)	4	3126.39	3128.13	NP_005991.1|,NP_006073.2|,NP_997195.1|,NP_525125.2|,NP_005992.1|,NP_006000.2|,NP_001257328.1|,NP_001257329.1|
GQVC[418]LPVISAENWKPATK (+3)	4	2358.15	2359.39	NP_001243284.1|,NP_001243285.1|,NP_003338.1|
VPADTEVVC[418]APPTAYIDFAR (+3)	4	2552.17	2553.53	NP_000356.1|,NP_001152759.1|
ELLNPVVEFVSHPSTTC[418]R (+3)	4	2445.15	2446.42	NP_008835.5|,NP_001075109.1|
M[16]IPC[418]DFLIPVQTQHPIR (+3)	4	2441.17	2442.54	NP_000166.2|,NP_001171651.1|
ISC[418]M[16]SKPPAPNPTPPR (+3)	4	2125.97	2127.13	NP_659731.1|
IISNASC[57]TTNC[418]LAPLAK (+3)	4	2194.02	2195.17	NP_002037.2|,NP_001243728.1|
IISNASC[57]TTNC[418]LAPLAK (+2)	4	2194.02	2195.17	NP_002037.2|,NP_001243728.1|
HELQANC[418]YEEVKDR (+3)	4	2150.91	2151.99	NP_005498.1|
DTGTVHLNELGNTQNFM[16]LLC[418]PR (+3)	4	2906.31	2473.78	NP_060598.3|
YSNSALGHVNC[418]TIK (+3)	4	1923.86	1924.81	NP_065393.1|,NP_997403.1|,NP_997404.1|,NP_722550.1|,NP_008939.1|
PM[16]C[418]VESFSDYPPLGR (+2)	4	2130.88	2132.05	NP_001393.1|
VPTANVSVVDLTC[418]R (+2)	4	1890.9	1891.83	NP_002037.2|,NP_001243728.1|
ISLGLPVGAVINC[418]ADNTGAK (+3)	4	2330.14	2331.33	NP_000969.1|
VPFC[418]LQSC[57]VKPLK (+3)	4	1935.94	1461.83	NP_055720.3|,NP_001243239.1|
YSNSALGHVNC[418]TIK (+2)	4	1923.86	1924.81	NP_065393.1|,NP_997403.1|,NP_997404.1|,NP_722550.1|,NP_008939.1|
VNQIGSVTESLQAC[418]K (+2)	4	1993.92	1994.9	NP_001419.1|,NP_001188412.1|
IC[418]ANHYITPM[16]M[16]ELKPNAGSDR (+4)	4	2810.23	2811.84	NP_002873.1|
TDLVPAFQNLM[16]KDC[418]EAEVR (+3)	4	2612.17	2613.6	NP_055040.2|
KLEEEQIILEDQNC[418]K (+3)	4	2249.03	2250.17	NP_002464.1|
APPC[418]EYKDWLTK (+3)	4	1867.83	1868.79	NP_008835.5|,NP_001075109.1|
IHEGC[418]EEPATHNALAK (+3)	4	2136.94	2138	NP_004850.1|
LLEC[418]PWLQQQHK (+3)	4	1939.91	1940.9	NP_002215.2|
VAHALAEGLGVIAC[418]IGEK (+3)	4	2168.08	2169.19	NP_001244955.1|,NP_000356.1|,NP_001152759.1|
AGKPVIC[418]ATQM[16]LESM[16]IK (+3)	4	2269.06	2270.37	NP_002645.3|,NP_872270.1|,NP_872271.1|,NP_001193725.1|,NP_001193726.1|,NP_001193727.1|,NP_001193728.1|
DSNNLC[418]LHFNPR (+3)	4	1846.79	1847.69	NP_002296.1|
VC[418]HAHPTLSEAFR (+3)	4	1884.84	1885.78	NP_000099.2|
KC[418]PFYAAEQDK (+2)	4	1716.73	1717.58	NP_002125.3|,NP_001120677.1|,NP_001120678.1|,NP_001120676.1|
SSVNC[418]PFSSQDM[16]K (+2)	4	1862.73	1863.7	NP_001348.2|
VPFLVLEC[418]PNLK (+2)	4	1788.89	1789.82	NP_067050.1|,NP_001254746.1|,NP_001254747.1|
GQKC[418]EFQDAYVLLSEK (+3)	4	2275.03	2276.21	NP_002147.2|,NP_955472.1|
SLHDALC[418]VLAQTVK (+3)	4	1914.93	1915.89	NP_001185771.1|,NP_006422.1|
AGKPVIC[418]ATQMLESM[16]IK (+3)	4	2253.07	2254.37	NP_002645.3|,NP_872270.1|,NP_872271.1|,NP_001193725.1|,NP_001193726.1|,NP_001193727.1|,NP_001193728.1|
KVDLSQPLIATC[418]R (+3)	4	1860.92	1861.84	NP_003303.2|,NP_001257412.1|
LTTPTYGDLNHLVSATM[16]SGVTTC[418]LR (+3)	4	3084.44	3086.13	NP_006078.2|,NP_821133.1|,NP_821080.1|,NP_006079.1|,NP_001060.1|
VPTANVSVVDLTC[418]R (+3)	4	1890.9	1891.83	NP_002037.2|,NP_001243728.1|
SGQGAFGNM[16]C[418]R (+2)	4	1560.59	1561.38	NP_000959.2|
AHVVPC[418]FDASK (+3)	4	1590.7	1591.47	NP_001447.2|,NP_001104026.1|
FAC[418]HSASLTVR (+3)	4	1608.72	1609.49	NP_031389.3|,NP_001138880.1|,NP_001138881.1|,NP_001138882.1|
NLSGQPNFPC[418]R (+2)	4	1649.71	1650.5	NP_064508.3|
IINDNATYC[418]R (+2)	4	1599.68	1600.44	NP_006383.2|
TYPGVM[16]HSSC[418]PQEM[16]AAVK (+3)	4	2384.99	2386.36	NP_009191.1|
AVLFC[418]LSEDKK (+3)	4	1669.78	1670.61	NP_005498.1|
FGEVVDC[418]TLK (+2)	4	1527.67	1528.41	NP_001003810.1|,NP_002129.2|,NP_112738.1|,NP_112737.1|
KC[418]PFYAAEQDK (+3)	4	1716.73	1717.58	NP_002125.3|,NP_001120677.1|,NP_001120678.1|,NP_001120676.1|
VQYPQSQAC[418]K (+2)	4	1568.68	1569.42	NP_001367.2|
LLKPEC[418]VLDK (+3)	4	1574.78	1575.55	NP_006827.1|
STLTDSLVC[418]K (+2)	4	1483.67	1484.36	NP_001952.1|
M[16]C[418]LFAGFQR (+2)	4	1505.63	1072.3	NP_004492.2|,NP_114032.2|
LEDEHLVFFC[418]QM[16]GK (+3)	4	2128.91	1695.96	NP_001106676.1|,NP_001106677.1|,NP_001106678.1|
STLTDSLVC[418]K (+3)	4	1483.67	1484.36	NP_001952.1|
VC[418]HAHPTLSEAFR (+4)	4	1884.84	1885.78	NP_000099.2|
TYAIC[418]GAIR (+2)	4	1384.63	1385.27	NP_001015.1|
KTPC[418]GEGSK (+3)	4	1323.56	906.016	NP_001014.1|,NP_001139699.1|
KTPC[418]GEGSK (+2)	4	1323.56	906.016	NP_001014.1|,NP_001139699.1|
GC[418]HLLVATPGR (+3)	4	1540.73	1541.46	NP_001180345.1|,NP_001180346.1|,NP_001347.3|,NP_004651.2|,NP_001116137.1|
KAQC[418]PIVER (+2)	4	1460.69	1461.37	NP_001000.2|
SGQGAFGNM[16]C[418]R (+3)	4	1560.59	1561.38	NP_000959.2|
HGFC[418]GIPITDTGR (+3)	4	1790.79	1791.67	NP_000875.2|
EIVHIQAGQC[418]GNQIGAK (+3)	4	2183.03	1765.99	NP_821133.1|,NP_821080.1|,NP_001060.1|,NP_006077.2|
KAQC[418]PIVER (+3)	4	1460.69	1461.37	NP_001000.2|
M[16]LPDKDC[418]R (+3)	4	1410.57	1411.29	NP_005498.1|
M[16]LPDKDC[418]R (+2)	4	1410.57	1411.29	NP_005498.1|
IVGC[418]SVHK (+3)	4	1259.58	842.018	NP_776247.3|,NP_001093861.1|,NP_001093862.1|,NP_001093863.1|,NP_112604.2|,NP_004491.2|,NP_001070910.1|,NP_001070911.1|
M[16]M[16]IPDC[418]QR (+2)	4	1442.55	1443.35	NP_004598.1|
VLC[418]PVIGK (+2)	4	1245.62	828.074	NP_004183.2|,NP_001166945.1|
LSQEC[418]PIK (+2)	4	1334.6	1335.21	NP_001153239.1|,NP_054757.1|
VVFC[418]PVK (+2)	4	1208.57	791.013	NP_001139186.1|,NP_005491.1|,NP_001139185.1|
GIFPVLC[418]K (+2)	4	1293.62	1294.25	NP_002645.3|,NP_872270.1|,NP_872271.1|,NP_001193725.1|,NP_001193726.1|,NP_001193727.1|,NP_001193728.1|
FC[418]PFAER (+3)	4	1286.52	868.999	NP_004823.1|,NP_001177931.1|,NP_001177932.1|
VC[418]NPIITK (+2)	4	1304.63	1305.23	NP_006588.1|
DIRPVC[418]R (+3)	4	1275.59	858.021	NP_005795.2|
KC[418]SASNR (+2)	4	1182.49	1182.98	NP_001015.1|
APQC[418]LGK (+2)	4	1133.5	715.862	NP_004492.2|,NP_114032.2|
KC[418]SASNR (+3)	4	1182.49	1182.98	NP_001015.1|
LPC[418]VAAK (+2)	4	1118.53	1119.02	NP_004068.2|
AVVVC[418]PK (+2)	4	1132.54	714.917	NP_004492.2|,NP_114032.2|
M[16]C[418]SM[16]VK (+2)	4	1147.42	697.931	NP_000997.1|
FAC[418]FER (+2)	4	1189.47	771.883	NP_998776.1|,NP_002626.1|,NP_005879.1|
VNQIGSVTESLQAC[418]K (+3)	4	1993.92	1994.9	NP_001419.1|,NP_001188412.1|
TSAVPSPC[418]GK (+2)	4	1363.59	1364.21	NP_000009.1|,NP_001029031.1|,NP_001257376.1|,NP_001257377.1|
VEDM[16]AELTC[418]LNEASVLHNLK (+3)	3	2662.21	2663.66	NP_001242941.1|,NP_002464.1|,NP_005955.3|,NP_001243024.1|
KPTDGASSSNC[418]VTDISHLVR (+3)	3	2504.14	2505.4	NP_002473.2|,NP_689511.2|,NP_001182122.1|
KPTDGASSSNC[418]VTDISHLVR (+4)	3	2504.14	2505.4	NP_002473.2|,NP_689511.2|,NP_001182122.1|
LAGANPAVITC[418]DELLLGHEK (+3)	3	2481.2	2482.49	NP_008835.5|,NP_001075109.1|
VLGM[16]TLIQKC[418]DFPIM[16]K (+3)	3	2286.09	1837.32	NP_006699.2|
M[16]PC[418]QSLQPEPINTPTHTK (+3)	3	2455.1	2456.43	NP_002408.3|,NP_001139438.1|
HELQANC[418]YEEVKDR (+4)	3	2150.91	2151.99	NP_005498.1|
AYHEQLTVAEITNAC[418]FEPANQM[16]VK (+3)	3	3140.4	3142.16	NP_116093.1|
AYHEQLSVAEITNAC[418]FEPANQM[16]VK (+4)	3	3126.39	3128.13	NP_005991.1|,NP_006073.2|,NP_997195.1|,NP_525125.2|,NP_005992.1|,NP_006000.2|,NP_001257328.1|,NP_001257329.1|
EIVHLQAGQC[418]GNQIGAK (+2)	3	2183.03	2184.12	NP_006078.2|,NP_006079.1|
SGC[418]IVNNLAEFTVDPK (+2)	3	2123.97	2125.05	NP_001448.2|,NP_001157789.1|,NP_001157790.1|,NP_001157791.1|
AC[418]QSIYPLHDVFVR (+3)	3	2064.95	2066.03	NP_000997.1|
IEGDM[16]IVC[418]AAYAHELPK (+3)	3	2293.02	2294.28	NP_000960.2|
SLGTIQQC[57]C[418]DAIDHLC[57]R (+3)	3	2407.02	1876.14	NP_008835.5|,NP_001075109.1|
YNPTWHC[418]IVGR (+3)	3	1762.77	1763.66	NP_001032583.1|,NP_001032584.1|,NP_003737.1|,NP_542408.1|
NSAKDC[418]YPAVQK (+3)	3	1740.76	1741.61	NP_002256.2|
SLHDALC[418]VLAQTVK (+2)	3	1914.93	1915.89	NP_001185771.1|,NP_006422.1|
SC[418]SLVLEHQPDNIK (+3)	3	1999.91	1582.78	NP_036313.3|
KVDLSQPLIATC[418]R (+2)	3	1860.92	1861.84	NP_003303.2|,NP_001257412.1|
VFANPEDC[418]VAFGK (+3)	3	1813.78	1814.7	NP_665735.1|,NP_064696.1|,NP_665734.1|,NP_665707.1|,NP_001247440.1|,NP_001247441.1|,NP_001254527.1|
LLEKC[418]AM[16]TALSSK (+3)	3	1827.86	1828.83	NP_006420.1|,NP_001159756.1|,NP_001159757.1|
NQSFC[418]PTVNLDK (+2)	3	1782.77	1783.64	NP_000981.1|
KC[418]M[16]LDAALATLNTHGK (+4)	3	2119.99	2121.12	NP_006827.1|
SSFYVNGLTLGGQKC[418]SVIR (+3)	3	2446.18	2447.45	NP_005013.1|
EILSELGKC[418]VAGK (+2)	3	1763.86	1764.72	NP_006827.1|
YVDIAIPC[418]NNK (+2)	3	1666.75	1667.57	NP_001012321.1|,NP_002286.2|
KC[418]PFTGNVSIR (+3)	3	1638.76	1639.56	NP_001006.1|
RDPHLAC[418]VAYER (+3)	3	1846.82	1847.73	NP_004850.1|,NP_001826.3|,NP_009029.3|
IIPGFM[16]C[418]QGGDFTR (+3)	3	1974.84	1541.79	NP_001157733.1|,NP_001157734.1|,NP_066953.1|,NP_839944.1|,NP_001137355.1|,NP_001129261.1|,NP_001137504.1|,XP_001718975.3|,XP_372741.4|,XP_003846538.1|,XP_003846552.1|,XP_003846565.1|
ALVDGPC[418]TQVR (+2)	3	1575.72	1576.46	NP_003964.3|,NP_001030168.1|
GNPVPILIPC[418]HR (+2)	3	1732.85	1733.72	NP_002403.2|
STNM[16]KC[418]LTPEK (+3)	3	1684.73	1685.6	NP_057535.1|,NP_001137533.1|,NP_001137534.1|
IHEGC[418]EEPATHNALAK (+4)	3	2136.94	2138	NP_004850.1|
HC[418]LLTC[57]EEC[57]K (+3)	3	1709.67	1178.4	NP_001014446.1|
KNILEESLC[418]ELVAK (+3)	3	2005.99	2007	NP_008835.5|,NP_001075109.1|
AVC[418]M[16]LSNTTAIAEAWAR (+3)	3	2241	2242.21	NP_005991.1|,NP_006073.2|,NP_997195.1|,NP_525125.2|,NP_005992.1|,NP_001180343.1|,NP_061816.1|,NP_006000.2|,NP_001257328.1|,NP_001257329.1|,XP_003846706.1|
NC[418]PHVVVGTPGR (+3)	3	1652.76	1653.55	NP_005795.2|
GLC[418]AIAQAESLR (+2)	3	1648.77	1649.55	NP_001247435.1|,NP_000996.2|,NP_001243731.1|
NM[16]SVHLSPC[418]FR (+3)	3	1723.73	1724.64	NP_001006.1|
LLEC[418]HFM[16]PPEK (+3)	3	1776.77	1777.74	NP_115766.3|
AETAANRIC[418]K (+3)	3	1493.68	1076.23	NP_004915.2|,NP_001093.1|,NP_001123476.1|,NP_001123477.1|,NP_001095.1|,NP_001245300.1|,NP_001094.1|
VPFLVLEC[418]PNLK (+3)	3	1788.89	1789.82	NP_067050.1|,NP_001254746.1|,NP_001254747.1|
LNKC[418]GVISPR (+3)	3	1503.73	1504.44	NP_001010.2|,NP_001025180.1|
HTNPIVENGQTHPC[418]QK (+3)	3	2219.98	1802.96	NP_036602.1|,NP_001177957.2|
AVAILC[418]NHQR (+3)	3	1541.72	1542.45	NP_003277.1|
AC[418]FHC[57]ETC[57]K (+3)	3	1572.56	1041.23	NP_006139.1|
FNNYVDC[418]M[16]KK (+3)	3	1694.69	1261.47	NP_008835.5|,NP_001075109.1|
NNTQVLINC[418]R (+2)	3	1591.72	1592.46	NP_004588.1|,NP_808210.2|
SLHDALC[418]VVK (+2)	3	1501.71	1502.42	NP_001008897.1|,NP_110379.2|
LLEC[418]PHLNVR (+2)	3	1610.77	1611.55	NP_078934.3|
NM[16]SVHLSPC[418]FR (+2)	3	1723.73	1724.64	NP_001006.1|
KC[418]YEM[16]ASHLR (+3)	3	1670.7	1671.58	NP_005013.1|
NIDPKPC[418]TPR (+3)	3	1557.71	1140.31	NP_061832.2|,NP_733829.1|
VKC[418]SGPGLER (+3)	3	1462.67	1463.35	NP_001447.2|,NP_001104026.1|
ERPLC[418]PLQPQNR (+3)	3	1867.88	1868.8	NP_056044.3|
YDDM[16]AAC[418]M[16]K (+2)	3	1496.51	1047.23	NP_003397.1|,NP_663723.1|,NP_001129171.1|,NP_001129172.1|,NP_001129173.1|,NP_001129174.1|
AAC[418]LPLPGYR (+2)	3	1477.68	1478.4	NP_002289.2|
DTGTVHLNELGNTQNFM[16]LLC[418]PR (+4)	3	2906.31	2473.78	NP_060598.3|
KGDEC[418]ELLGHSK (+3)	3	1732.75	1733.58	NP_003312.3|
KNASC[418]GTR (+3)	3	1253.53	835.929	NP_006799.1|
AVLC[418]PPPVK (+3)	3	1340.66	923.174	NP_008839.2|,NP_061485.1|,NP_005043.1|
GC[418]ILTLVER (+2)	3	1420.68	1421.35	NP_001093131.1|,NP_003743.1|,NP_001032897.1|,NP_001186071.1|,NP_001254503.1|
TTSSANNPNLM[16]YQDEC[418]DRR (+3)	3	2648.07	2649.46	NP_006377.2|,NP_001091974.1|
LSTAC[418]PGR (+2)	3	1221.53	1222.06	NP_001307.2|,NP_001243064.1|
TM[16]C[418]PLLSM[16]K (+2)	3	1472.62	1023.33	NP_056156.2|
LTTPTYGDLNHLVSATM[16]SGVTTC[418]LR (+4)	3	3084.44	2652.01	NP_006078.2|,NP_821133.1|,NP_821080.1|,NP_006079.1|,NP_001060.1|
SC[418]AGISGK (+2)	3	1139.47	1139.95	NP_006845.1|,NP_001094073.1|,NP_006792.1|
AIC[418]DHVR (+3)	3	1230.53	812.937	NP_005908.1|,NP_001186040.1|,NP_001186041.1|
SC[57]NC[418]LLLK (+2)	3	1367.6	1368.28	NP_001419.1|,NP_001188412.1|
LIPDGC[418]GVK (+2)	3	1318.6	901.082	NP_542784.1|,NP_006004.2|,NP_001243509.1|
AAEDKC[418]K (+3)	3	1181.48	763.86	NP_001138632.1|
EIRPVC[418]R (+3)	3	1289.6	872.047	NP_004631.1|,NP_542165.1|
IEC[418]SHIR (+3)	3	1274.55	856.99	NP_057475.2|,NP_001243468.1|,NP_001243469.1|
KC[418]SEVAR (+2)	3	1209.53	791.916	NP_114127.3|,NP_060658.3|,NP_001164006.1|,NP_001164007.1|
KC[418]SEVAR (+3)	3	1209.53	791.916	NP_114127.3|,NP_060658.3|,NP_001164006.1|,NP_001164007.1|
SKEEAC[418]K (+2)	3	1211.5	1212.02	NP_001129477.1|,NP_001129478.1|,NP_000810.1|,NP_780294.1|
RC[418]TKPDR (+3)	3	1292.58	875.008	NP_055117.1|,NP_001012474.1|
VLVHC[418]R (+3)	3	1143.53	725.903	NP_004081.1|
VLVHC[418]R (+2)	3	1143.53	725.903	NP_004081.1|
TGAPC[418]R (+2)	3	1021.41	1021.82	NP_001967.3|,NP_443739.3|,NP_001180432.1|,NP_001966.1|,NP_001419.1|,NP_001188412.1|
FENLC[418]K (+2)	3	1170.48	1171.01	NP_031381.2|,NP_001017963.2|,NP_005339.3|
SLGTIQQC[418]C[57]DAIDHLC[57]R (+3)	3	2407.02	2408.32	NP_008835.5|,NP_001075109.1|
ANFSLPEKC[418]DYM[16]DEVTYGELEKEEAQPIVTK (+4)	2	4009.79	4012.07	NP_001073027.1|
EAQNLQC[418]AASTAQESC[57]PPKPPR (+3)	2	2800.24	2801.72	NP_056315.1|,NP_950251.1|
ESGSLSPEHGPVVVHC[418]SAGIGR (+3)	2	2592.18	2175.38	NP_002818.1|
IVGPSGAAVPC[418]KVEPGLGADNSVVR (+3)	2	2809.39	2810.86	NP_001447.2|,NP_001104026.1|
VSGGLEVLAEKC[418]PNLTHLNLSGNK (+4)	2	2910.44	2911.96	NP_006296.1|
ESGSLSPEHGPVVVHC[418]SAGIGR (+4)	2	2592.18	2175.38	NP_002818.1|
TC[418]TTVAFTQVNSEDKGALAK (+3)	2	2501.16	2502.44	NP_000963.1|
AEVSELKC[418]GDLEEELKNVTNNLK (+3)	2	2992.42	2993.97	NP_003281.1|,NP_001138632.1|
ELLELSC[57]C[57]HSC[418]PFSSTAAAK (+3)	2	2628.11	2629.57	NP_071757.4|
QM[16]EKDETVSDC[418]SPHIANIGR (+3)	2	2663.14	2664.56	NP_004921.1|,NP_001193469.1|
YADLTEDQLPSC[418]ESLKDTIAR (+3)	2	2785.26	2786.7	NP_002620.1|
THC[418]PYAVALPEVAPAQPLTEALR (+3)	2	2864.4	2865.94	NP_689956.2|
SC[418]SGVEFSTSGHAYTDTGK (+3)	2	2350.95	2352.13	NP_005653.3|
ADHQPLTEASYVNLPTIALC[418]NTDSPLR (+4)	2	3356.58	3358.38	NP_001012321.1|,NP_002286.2|
EKLC[418]YVALDFEQEM[16]ATAASSSSLEK (+3)	2	3183.41	3185.17	NP_001605.1|,NP_001092.1|,NP_001186883.1|,NP_001077007.1|
VGVGTC[418]GIADKPM[16]TQYQDTSK (+3)	2	2632.16	2633.59	NP_005862.1|
QTISNAC[418]GTIGLIHAIANNK (+3)	2	2456.19	2457.45	NP_005993.1|
ADHQPLTEASYVNLPTIALC[418]NTDSPLR (+3)	2	3356.58	3358.38	NP_001012321.1|,NP_002286.2|
GEETPVIVGSALC[418]ALEGRDPELGLK (+3)	2	2970.45	2972.01	NP_003312.3|
LVNAC[418]LAEELPHIHAFEQK (+4)	2	2579.23	2580.6	NP_001026997.1|,NP_001034271.1|
HELQANC[57]YEEVKDRC[418]TLAEK (+3)	2	2853.25	2854.78	NP_005498.1|
DQQEAALVDM[16]VNDGVEDLRC[418]K (+3)	2	2781.2	2782.69	NP_000843.1|
KC[418]LELFSELAEDKENYKK (+4)	2	2604.22	2605.6	NP_031381.2|
VLSEC[57]SPLM[16]NDIFNKEC[418]R (+3)	2	2588.12	2098.42	NP_057535.1|,NP_001137533.1|,NP_001137534.1|
LKPLPGETM[16]EKC[418]TQDLGNSTK (+4)	2	2723.26	2724.74	NP_006280.3|
IIQLLDDYPKC[418]FIVGADNVGSK (+3)	2	2825.38	2826.9	NP_444505.1|,NP_000993.1|
VAAASGHC[418]GAFSGSDSSR (+3)	2	2083.85	2084.86	NP_055427.2|
AVC[418]M[16]LSNTTAIAEAWAR (+2)	2	2241	2242.21	NP_005991.1|,NP_006073.2|,NP_997195.1|,NP_525125.2|,NP_005992.1|,NP_001180343.1|,NP_061816.1|,NP_006000.2|,NP_001257328.1|,NP_001257329.1|,XP_003846706.1|
M[16]TNHC[418]VFSANEDHETIR (+3)	2	2436.99	2438.29	NP_001153239.1|,NP_054757.1|
KC[418]LELFTELAEDKENYK (+4)	2	2490.14	2491.45	NP_001017963.2|,NP_005339.3|
LVQTPLTDRC[418]YLTM[16]TQALEAR (+3)	2	2856.36	2857.93	NP_001367.2|
VNIEGGAIALGHPLGASGC[418]R (+3)	2	2309.1	2310.28	NP_005882.2|
YASIC[418]QQNGIVPIVEPEILPDGDHDLKR (+4)	2	3536.71	3538.62	NP_001230106.1|,NP_000025.1|,NP_908930.1|,NP_908932.1|,NP_001121089.1|,NP_005156.1|
TC[418]NVLVALEQQSPDIAQGVHLDR (+3)	2	2923.4	2924.92	NP_005902.1|
AGAIAPC[418]EVTVPAQNTGLGPEK (+3)	2	2540.2	2541.52	NP_444505.1|,NP_000993.1|
AYEFAERC[418]NEPAVWSQLAK (+3)	2	2629.17	2630.57	NP_004850.1|
FSVC[418]VLGDQQHC[57]DEAK (+3)	2	2252.93	2254.11	NP_009035.3|
TVM[16]PC[418]GTVVTTVTAVK (+2)	2	2039.97	2041.07	NP_056315.1|,NP_950251.1|
VNPLGGAVALGHPLGC[418]TGAR (+3)	2	2277.11	1860.15	NP_001598.1|,NP_001123882.1|
GEETPVIVGSALC[418]ALEGR (+2)	2	2218.04	2219.16	NP_003312.3|
EM[16]FPYEASTPTGISASC[418]R (+3)	2	2379.98	2381.28	NP_001027454.1|,NP_001027455.1|
TQTVC[418]NFTDGALVQHQEWDGK (+3)	2	2794.21	2795.68	NP_001435.1|
SLC[57]IPFKPLC[418]ELQPGAK (+3)	2	2318.13	2319.4	NP_004437.2|
KSC[418]VEEPEPEPEAAEGDGDKK (+4)	2	2661.12	2662.48	NP_004485.1|,NP_001119522.1|,NP_001119523.1|
VGEVC[418]HITC[57]KPEYAYGSAGSPPK (+3)	2	2867.27	2868.85	NP_002005.1|
HELQANC[57]YEEVKDRC[418]TLAEK (+4)	2	2853.25	2854.78	NP_005498.1|
APSVANVGSHC[418]DLSLK (+3)	2	2014.92	2015.92	NP_001447.2|,NP_001104026.1|
ATC[418]APQHGAPGPGPADASK (+3)	2	2149.93	2151	NP_001447.2|,NP_001104026.1|
LNLSC[418]IHSPVVNELM[16]R (+3)	2	2258.06	1825.16	NP_057018.1|
M[16]EEFKDQLPADEC[418]NKLKEEISK (+4)	2	3057.38	3059.06	NP_004125.3|
KPVSTTNLQDPGVLGC[418]PR (+3)	2	2299.11	2300.28	NP_055950.1|
GFIKDC[418]PSGQLDAAGFQK (+3)	2	2299.04	2300.23	NP_055101.2|,NP_001122298.1|
AEGSDVANAVLDGADC[418]IM[16]LSGETAK (+3)	2	2870.24	2871.78	NP_002645.3|,NP_872270.1|,NP_872271.1|,NP_001193725.1|,NP_001193726.1|,NP_001193727.1|,NP_001193728.1|
INQVFHGSC[418]ITEGNELTK (+3)	2	2407.09	2408.33	NP_008835.5|,NP_001075109.1|
KC[418]LELFSELAEDKENYK (+3)	2	2476.13	2477.43	NP_031381.2|
M[16]TNHC[418]VFSANEDHETIR (+4)	2	2436.99	2438.29	NP_001153239.1|,NP_054757.1|
KSC[418]VEEPEPEPEAAEGDGDKK (+3)	2	2661.12	2662.48	NP_004485.1|,NP_001119522.1|,NP_001119523.1|
KGTVEGFEPADNKC[418]LLR (+3)	2	2294.08	1877.13	NP_003125.3|
TKSC[418]SGVEFSTSGSSNTDTGK (+3)	2	2497.04	2498.28	NP_003366.2|,NP_001171712.1|,NP_001171752.1|
NM[16]ITGTAPLDGC[418]ILVVAANDGPM[16]PQTR (+3)	2	3204.47	3206.3	NP_003312.3|
DC[418]IGGC[57]SDLVSLQQSGELLTR (+3)	2	2668.19	2669.6	NP_001230587.1|,NP_001230588.1|,NP_002055.1|,NP_001112362.1|
LGEINVIGEPFLNVNC[418]EHIK (+3)	2	2655.28	2656.69	NP_005905.2|,NP_877423.1|
LFTIHQIDAC[418]TNNLPK (+3)	2	2245.07	2246.23	NP_073576.1|
ELLNPVVEFVSHPSTTC[418]R (+4)	2	2445.15	2446.42	NP_008835.5|,NP_001075109.1|
C[57]C[57]LTYC[418]FNKPEDK (+3)	2	2094.83	2095.99	NP_001129064.1|,NP_002945.1|,NP_001170884.1|
KGGSYTQAASSDSAQGSDVSLTAC[418]K (+3)	2	2836.23	2837.67	NP_002107.3|,NP_001229687.1|
NIAFFSTNC[418]VEGTAR (+2)	2	2046.89	2047.92	NP_001153706.1|,NP_001153705.1|,NP_000692.2|
VC[418]NALALLQC[57]VASHPETR (+3)	2	2399.12	2400.39	NP_005435.1|
QFTPC[418]QLLADHANSPNK (+3)	2	2301.03	2302.21	NP_000173.2|
IIDINYYPVPEAC[418]LSNKR (+3)	2	2525.21	2108.42	NP_001024.1|
LTTLPSDFC[418]GLTHLVK (+3)	2	2162.05	2163.18	NP_060979.2|
QTPNDLTGEHSC[418]IM[16]LK (+3)	2	2219.96	2221.15	NP_078938.2|,NP_001137502.1|
LATDLLSLM[16]PSLTSGEVAHC[418]AK (+3)	2	2690.28	2257.63	NP_004740.2|,NP_001248763.1|
SLC[418]IPFKPLC[57]ELQPGAK (+3)	2	2318.13	2319.4	NP_004437.2|
AEVSELKC[418]GDLEEELK (+3)	2	2208.99	2210.1	NP_003281.1|,NP_001138632.1|
AC[418]QSIYPLHDVFVR (+2)	2	2064.95	2066.03	NP_000997.1|
GTVEGFEPADNKC[418]LLR (+3)	2	2165.99	2167.09	NP_003125.3|
YRC[418]ELLYEGPPDDEAAM[16]GIK (+3)	2	2703.17	2704.66	NP_001952.1|
VFIGKDC[418]IGGC[57]SDLVSLQQSGELLTR (+3)	2	3212.53	3214.28	NP_001230587.1|,NP_001230588.1|,NP_002055.1|,NP_001112362.1|
RGPC[418]IIYNEDNGIIK (+3)	2	2122	2123.08	NP_000959.2|
VDEFPLC[418]GHM[16]VSDEYEQLSSEALEAAR (+3)	2	3458.47	3460.39	NP_006004.2|,NP_001243506.1|
KDGNASGTTLLEALDC[418]ILPPTRPTDKPLR (+4)	2	3509.76	3511.64	NP_001393.1|
KDGNASGTTLLEALDC[418]ILPPTRPTDKPLR (+5)	2	3509.76	3093.51	NP_001393.1|
SVANVIQQAGC[418]PVPEYIK (+3)	2	2333.12	2334.33	NP_008941.2|
NYLEPGKEC[418]VQPATK (+3)	2	2093.96	2095.02	NP_733765.1|
VLISSLQDC[418]LHGIESK (+3)	2	2159.04	2160.13	NP_008938.2|
KVFANPEDC[418]VAFGK (+3)	2	1941.88	1942.87	NP_665735.1|,NP_064696.1|,NP_665734.1|,NP_665707.1|,NP_001247440.1|,NP_001247441.1|,NP_001254527.1|
EVC[418]PVLDQFLC[57]HVAK (+3)	2	2175	2176.17	NP_777567.1|
GFC[418]FITFKEEEPVKK (+4)	2	2219.04	1802.1	NP_001003810.1|,NP_002129.2|,NP_112738.1|,NP_112737.1|
YGDGGSSFQSTTGHC[418]VHM[16]R (+4)	2	2459.97	2027.16	NP_062543.1|,NP_001027565.1|
VM[16]TIPYQPM[16]PASSPVIC[418]AGGQDR (+3)	2	2867.28	2418.81	NP_006187.2|
IVEDEPNKIC[418]EADR (+3)	2	2047.9	2048.91	NP_001307.2|,NP_001243064.1|
GPQLFHM[16]DPSGTFVQC[418]DAR (+3)	2	2539.07	2540.47	NP_002781.2|,NP_001186701.1|,NP_001186702.1|,NP_001186703.1|
LVEALC[418]AEHQINLIK (+3)	2	2111.05	2112.14	NP_001007.2|
TVYGGGC[418]SEM[16]LM[16]AHAVTQLANR (+3)	2	2758.2	2309.64	NP_001185771.1|,NP_006422.1|
INPYM[16]SSPC[418]HIEM[16]ILTEK (+3)	2	2555.12	2556.61	NP_000976.1|,NP_001030178.1|,NP_001186269.1|,NP_001186270.1|,NP_001186271.1|,NP_001186272.1|,NP_001186274.1|,NP_001186284.1|,NP_001186285.1|,NP_001186273.1|
VM[16]PFSTAC[418]NTPLSNFESHQNYK (+3)	2	2948.26	2949.9	NP_002152.2|,NP_038203.2|
TAPSSSC[418]TAVASAASRPDSTHM[16]VEAR (+4)	2	3023.32	3024.93	NP_149072.2|,NP_542987.2|,NP_001180298.1|,NP_001180299.1|
TSQC[418]SSPSLSASPGSPTRPQIR (+3)	2	2661.23	2662.57	NP_001121600.1|,NP_110378.3|,NP_001167564.1|,NP_001167565.1|,NP_001167566.1|,NP_001167567.1|
KVFANPEDC[418]VAFGK (+2)	2	1941.88	1942.87	NP_665735.1|,NP_064696.1|,NP_665734.1|,NP_665707.1|,NP_001247440.1|,NP_001247441.1|,NP_001254527.1|
ISLGLPVGAVINC[418]ADNTGAK (+2)	2	2330.14	2331.33	NP_000969.1|
SDSNPLTEILKC[418]PTK (+3)	2	2062.97	2064	NP_116294.1|,NP_001139019.1|
KHPSSPEC[418]LVSAQK (+3)	2	1927.89	1928.85	NP_006176.2|
SGGATIEELTEKC[418]K (+3)	2	1882.84	1883.76	NP_115571.1|,NP_620305.1|
SC[418]M[16]LTGTPESVQSAK (+2)	2	1971.84	1972.87	NP_003893.2|
GEETPVIVGSALC[418]ALEGR (+3)	2	2218.04	2219.16	NP_003312.3|
ENSGAAEKPVTIHATPEGTSEAC[418]R (+4)	2	2872.28	2873.74	NP_006539.3|,NP_001007226.1|
AANIPEHNTIGFM[16]FAC[418]VGR (+3)	2	2481.1	2048.35	NP_671717.1|
SQQSKPQDASC[418]LPALK (+3)	2	2117.99	2119.04	NP_055704.2|,NP_001229236.1|,NP_001229238.1|
LQGINC[418]GPDFTPSFANLGR (+3)	2	2424.1	2425.36	NP_937884.1|,NP_886553.3|,NP_004944.3|,NP_937885.1|,NP_937887.1|,NP_001181875.1|,NP_001181876.1|
TFVPAM[16]TAIHGPPITAPVVC[418]TR (+3)	2	2712.32	2279.72	NP_056973.2|,NP_001003891.1|
M[16]VSDINNAWGC[418]LEQVEK (+3)	2	2369.01	2370.3	NP_001093.1|,NP_001123476.1|,NP_001123477.1|
VC[57]NALALLQC[418]VASHPETR (+3)	2	2399.12	2400.39	NP_005435.1|
KQELEEIC[418]HDLEAR (+3)	2	2129.95	2131.01	NP_002464.1|
HGFC[418]GIPITDTGR (+2)	2	1790.79	1791.67	NP_000875.2|
SM[16]SVYC[418]TPNKPSR (+3)	2	1902.81	1903.81	NP_733765.1|,NP_001672.1|
HELQANC[418]YEEVKDR (+2)	2	2150.91	2151.99	NP_005498.1|
EM[16]NPALGIDC[418]LHK (+3)	2	1873.82	1874.81	NP_036205.1|
GQKC[418]EFQDAYVLLSEK (+2)	2	2275.03	2276.21	NP_002147.2|,NP_955472.1|
LAGANPAVITC[418]DELLLGHEK (+4)	2	2481.2	2064.36	NP_008835.5|,NP_001075109.1|
VIGIEC[418]SSISDYAVK (+2)	2	2000.92	2001.93	NP_001193971.1|,NP_001527.3|,NP_938074.2|
KYEDIC[418]PSTHNM[16]DVPNIK (+4)	2	2537.1	2104.36	NP_001093162.1|,NP_001137232.1|,NP_001961.1|,NP_001137233.1|,NP_001137234.1|,NP_065123.1|
LTTINC[418]EEGDKLK (+3)	2	1880.86	1881.78	NP_001193496.1|,NP_005522.2|
VC[418]ENIPIVLC[57]GNK (+2)	2	1875.87	1876.85	NP_006316.1|
QTEALKC[418]VAQASK (+3)	2	1793.84	1794.71	NP_002806.2|,NP_001257411.1|
HFVGM[16]LPEKDC[418]R (+3)	2	1864.81	1431.68	NP_006861.1|,NP_001011546.1|
M[16]LVQC[418]M[16]QDQEHPSIR (+3)	2	2263.95	2265.22	NP_002262.3|
AVC[418]M[16]LSNTTAVAEAWAR (+3)	2	2226.99	2228.19	NP_116093.1|
SQETEC[418]TYFSTPLLLGK (+3)	2	2334.05	2335.27	NP_005909.2|
VPTHVPVC[418]VLGNYR (+3)	2	1970.95	1971.96	NP_001167460.1|,NP_078994.3|,NP_001167459.1|
LVVPASQC[418]GSLIGK (+3)	2	1788.89	1789.78	NP_001092090.1|,NP_005007.2|,NP_114366.1|,NP_001122383.1|,NP_001122384.1|,NP_001122385.1|,NP_001122386.1|,NP_001123613.1|,NP_065389.2|
FLVTLAQKC[418]PAAK (+3)	2	1806.92	1807.84	NP_056121.2|
VQNNLYHHC[418]VINK (+4)	2	1998.92	1581.8	NP_056046.1|
SYC[418]AEIAHNVSSK (+3)	2	1825.78	1826.67	NP_000985.1|,NP_001007074.1|,NP_001007075.1|
VRPC[418]VVYGGADIGQQIR (+3)	2	2248.09	2249.24	NP_001180345.1|,NP_001180346.1|,NP_001347.3|,NP_004651.2|,NP_001116137.1|
HELQANC[418]YEEVK (+2)	2	1879.79	1880.71	NP_005498.1|
LVVPATQC[418]GSLIGK (+2)	2	1802.91	1803.8	NP_006187.2|
QTEALKC[418]VAQASK (+2)	2	1793.84	1794.71	NP_002806.2|,NP_001257411.1|
YKVC[418]NYGLTFTQK (+2)	2	1981.91	1982.93	NP_001129166.1|,NP_005653.3|
AEVSELKC[418]GDLEEELK (+2)	2	2208.99	2210.1	NP_003281.1|,NP_001138632.1|
ELC[418]HTQSSHASLR (+3)	2	1885.82	1886.73	NP_004578.2|,NP_001036041.1|
FNAHGDANTIVC[418]NSK (+2)	2	2007.86	2008.85	NP_002296.1|
AIPQVKC[418]NEQPNR (+3)	2	1913.89	1914.82	NP_055423.1|,NP_055191.2|,NP_001032410.1|,NP_001032409.2|
APIIC[418]VLGHVDTGK (+3)	2	1839.9	1840.82	NP_056988.3|
ADVIQATGDAIC[418]IFR (+2)	2	2009.93	1592.81	NP_003137.1|
VLSLNFSEC[418]HTK (+3)	2	1794.81	1795.7	NP_987100.1|,NP_987101.1|,NP_036429.2|
SYC[418]AEIAHNVSSK (+2)	2	1825.78	1826.67	NP_000985.1|,NP_001007074.1|,NP_001007075.1|
LGVENC[418]YFPM[16]FVSQSALEK (+3)	2	2595.15	2596.61	NP_004437.2|
NLDKEYLPIGGLAEFC[418]K (+3)	2	2327.1	2328.33	NP_002071.2|
KDGNASGTTLLEALDC[418]ILPPTRPTDK (+4)	2	3143.53	2727.05	NP_001393.1|
IIC[418]SAGLSLLAEER (+2)	2	1891.92	1892.85	NP_054783.2|
NC[418]LTNFHGM[16]DLTR (+3)	2	1954.81	1955.85	NP_000997.1|
LTFSC[418]LGGSDNFK (+2)	2	1805.78	1806.68	NP_006592.3|
PGHLQEGFGC[418]VVTNR (+2)	2	2030.91	1613.8	NP_001018077.1|,NP_001018078.1|,NP_056455.3|,NP_001018079.1|
DKADFC[418]IIHYAGK (+3)	2	1897.85	1898.82	NP_001242941.1|,NP_002464.1|,NP_005955.3|,NP_001243024.1|
GSQM[16]GTVQPIPC[418]LLSM[16]PTR (+3)	2	2465.12	2466.53	NP_055427.2|
EILSELGKC[418]VAGK (+3)	2	1763.86	1764.72	NP_006827.1|
QAVDSPAASFC[418]R (+2)	2	1668.7	1669.5	NP_075068.2|
VVLDNIHGC[418]PLR (+3)	2	1752.84	1753.71	NP_055744.2|,NP_001129665.1|,NP_001129666.1|
QWNNC[418]AFLESSAK (+2)	2	1914.8	1915.76	NP_056461.1|,NP_001010942.1|,NP_001238847.1|,NP_001238850.1|,NP_001238851.1|,NP_001238846.1|
KLEEEQIILEDQNC[418]K (+2)	2	2249.03	2250.17	NP_002464.1|
SQIC[418]DNAALYAQK (+2)	2	1841.81	1842.71	NP_001307.2|
RGPEVTSQGVQTSSPAC[418]K (+3)	2	2249.02	2250.13	NP_002964.3|
ETVSEESNVLC[418]LSK (+2)	2	1954.87	1955.82	NP_001952.1|
SWHLTPSC[418]PLDPAPLR (+3)	2	2207.03	1790.05	NP_001560.2|,NP_001020413.1|,NP_001020414.1|
ELPGHTGYLSC[418]C[57]R (+3)	2	1909.79	1435.63	NP_005264.2|,NP_067642.1|
KGTDIM[16]YTGTLDC[418]WR (+3)	2	2192.93	1760	NP_001143.2|
YLAEVAC[418]GDDRK (+2)	2	1756.75	1757.61	NP_006817.1|
VAC[418]IGAWHPAR (+3)	2	1597.73	1598.51	NP_005052.1|,NP_000958.1|,NP_001029025.1|
VTKC[418]C[57]TESLVNR (+3)	2	1826.81	1827.73	NP_000468.1|
EVESVDLPHC[418]HLIK (+4)	2	2035.95	1618.85	NP_000296.2|,NP_001018171.1|
GC[418]LLYGPPGTGK (+2)	2	1579.72	1580.49	NP_002797.3|
NTGIIC[418]TIGPASR (+2)	2	1719.81	1720.63	NP_002645.3|,NP_872270.1|,NP_872271.1|,NP_001193725.1|,NP_001193726.1|,NP_001193728.1|
SPVTTLLEC[418]M[16]HK (+3)	2	1791.8	1792.75	NP_056655.2|,NP_056656.2|,NP_001102.2|,NP_001020278.1|,NP_001180424.1|
TATFENIVC[418]VLNR (+3)	2	1896.89	1897.83	NP_066961.2|
GSSGPQPAKPC[418]SGATPTPLLLVGDR (+3)	2	2823.37	2824.84	NP_203744.1|
TLIQNC[418]GASTIR (+2)	2	1693.79	1694.59	NP_005989.3|,NP_001008800.1|
NQSFC[418]PTVNLDK (+3)	2	1782.77	1783.64	NP_000981.1|
TLVPHYC[418]ELVGANPK (+3)	2	2057.97	1640.9	NP_065731.3|,NP_001041683.1|
SPVTTLLEC[418]MHK (+3)	2	1775.8	1358.63	NP_056655.2|,NP_056656.2|,NP_001102.2|,NP_001020278.1|,NP_001180424.1|
VVLDNIHGC[418]PLR (+2)	2	1752.84	1753.71	NP_055744.2|,NP_001129665.1|,NP_001129666.1|
VNQAIWLLC[418]TGAR (+2)	2	1861.9	1862.83	NP_001000.2|
ELEKVC[418]NPIITK (+3)	2	1803.89	1386.66	NP_006588.1|
NTGIIC[418]TIGPASR (+3)	2	1719.81	1720.63	NP_002645.3|,NP_872270.1|,NP_872271.1|,NP_001193725.1|,NP_001193726.1|,NP_001193728.1|
VM[16]SQNFTNC[418]HTK (+3)	2	1842.75	1409.59	NP_005745.1|,NP_938405.1|
VVNEINIEDLC[418]LTK (+2)	2	2019.96	2020.98	NP_001008389.1|
KDC[418]EVVM[16]M[16]IGLPGAGK (+2)	2	2096.94	2098.14	NP_004492.2|,NP_114032.2|
AAAPAPVSEAVC[418]R (+2)	2	1658.75	1659.55	NP_775083.1|,NP_001035905.1|,NP_001177371.1|
IAILTC[418]PFEPPKPK (+4)	2	1971	1553.91	NP_036205.1|
AHEILPNLVC[418]C[57]SAK (+3)	2	1971.9	1497.78	NP_006576.2|
VLC[418]LAVAVGHVK (+3)	2	1625.84	1208.52	NP_009035.3|
DGNASGTTLLEALDC[418]ILPPTRPTDKPLR (+3)	2	3381.67	2965.34	NP_001393.1|
IC[418]LIHGPPGTGK (+3)	2	1609.77	1610.56	NP_055861.3|
TLLC[418]LSLTGPHK (+3)	2	1699.84	1700.68	NP_055791.1|
DLNYC[418]FSGM[16]SDHR (+3)	2	1977.74	1978.79	NP_005511.1|,NP_062543.1|,NP_001244222.1|,NP_001027565.1|
LPADTC[418]LLEFAR (+2)	2	1765.82	1766.7	NP_079106.3|
VC[418]TLAIIDPGDSDIIR (+3)	2	2118.01	2119.08	NP_000980.1|
FTFIEKC[418]NNPR (+2)	2	1785.8	1786.69	NP_001009186.1|,NP_001753.1|
RPGAALDPGC[418]VLAK (+3)	2	1784.87	1785.75	NP_942131.1|,NP_942134.1|,NP_942135.1|,NP_942133.1|,NP_942136.1|
EIVHIQAGQC[418]GNQIGAK (+2)	2	2183.03	1765.99	NP_821133.1|,NP_821080.1|,NP_001060.1|,NP_006077.2|
NILEESLC[418]ELVAK (+2)	2	1877.89	1878.82	NP_008835.5|,NP_001075109.1|
DLSYC[418]LSGM[16]YDHR (+3)	2	1992.78	1993.85	NP_004957.1|,NP_001091678.1|,NP_001091677.1|,NP_001091675.1|,NP_001091674.1|,NP_001091676.1|
VQNNLYHHC[418]VINK (+3)	2	1998.92	1581.8	NP_056046.1|
KNC[418]PHVVVGTPGR (+3)	2	1780.85	1781.72	NP_005795.2|
WSSLAC[418]NIALDAVK (+2)	2	1907.89	1908.85	NP_005989.3|,NP_001008800.1|
SIKDTIC[418]NQDER (+2)	2	1838.79	1839.66	NP_055140.1|
IC[418]DQWDALGSLTHSR (+3)	2	2118.93	2119.99	NP_004915.2|
DFTPVC[418]TTELGR (+2)	2	1755.76	1756.62	NP_004896.1|
NC[418]PHIVVGTPGR (+3)	2	1666.77	1667.57	NP_004631.1|,NP_542165.1|
ESVDHLTIPSRC[418]GK (+4)	2	1958.9	1541.73	NP_002152.2|,NP_038203.2|
TVIGC[57]SGFHGDC[418]LTLTK (+3)	2	2225.99	2227.17	NP_002784.1|
LC[418]SLFYTNEEVAK (+2)	2	1933.86	1934.84	NP_001181885.1|,NP_954659.1|,NP_061322.2|,NP_001181883.1|,NP_001181884.1|
VFANPEDC[418]VAFGK (+2)	2	1813.78	1814.7	NP_665735.1|,NP_064696.1|,NP_665734.1|,NP_665707.1|,NP_001247440.1|,NP_001247441.1|,NP_001254527.1|
IYHPNINSNGSIC[418]LDILR (+3)	2	2459.17	2460.45	NP_003331.1|,NP_871615.1|,NP_871617.1|,NP_871621.1|,NP_871616.1|,NP_871618.1|,NP_871619.1|,NP_871620.1|,NP_871622.1|,NP_057067.1|,NP_003329.1|,NP_001191809.1|,NP_003330.1|,NP_862821.1|
SM[16]SVYC[418]TPNKPSR (+2)	2	1902.81	1469.69	NP_733765.1|,NP_001672.1|
ISGPNPLSC[418]LKK (+3)	2	1673.83	1256.51	NP_115710.2|
AFLLDPDRC[418]VVQR (+3)	2	1948.93	1949.91	NP_057542.2|,XP_001126758.1|
QNTYC[418]FPHSLR (+3)	2	1782.76	1783.65	NP_056450.2|
TAAPTVC[418]LLVLSQAEK (+2)	2	2061.03	2062.07	NP_060663.2|,NP_001106849.1|
VQEKC[418]QLEINFNTLQTK (+3)	2	2453.17	2454.44	NP_004915.2|,NP_001093.1|,NP_001123476.1|,NP_001123477.1|,NP_001094.1|
GC[418]TATLGNFAK (+2)	2	1499.65	1500.36	NP_002943.2|
LVVVLC[418]NLKPQK (+3)	2	1770.95	1771.85	NP_003671.1|
ATGRPEC[418]FLTIQEGLASK (+3)	2	2338.11	2339.31	NP_005782.1|
VAASPEDIKLC[418]R (+3)	2	1718.81	1719.64	NP_055899.2|
ENSQM[16]FQGRPC[418]K (+3)	2	1857.76	1424.6	NP_001295.2|,NP_001186704.1|
AHVVPC[418]FDASK (+2)	2	1590.7	1173.34	NP_001447.2|,NP_001104026.1|
NC[418]IVLIDSTPYR (+3)	2	1810.84	1811.74	NP_001003.1|
NTPLC[418]DSFVFR (+3)	2	1715.74	1716.6	NP_004448.2|,NP_976251.1|
YNPTWHC[418]IVGR (+2)	2	1762.77	1763.66	NP_001032583.1|,NP_001032584.1|,NP_003737.1|,NP_542408.1|
VC[418]EIHFHEINNK (+4)	2	1899.84	1482.66	NP_002433.1|,NP_733839.1|,NP_620412.1|
KC[418]PFTGNVSIR (+2)	2	1638.76	1639.56	NP_001006.1|
RELHGQNPVVTPC[418]NK (+3)	2	2108.99	2110.04	NP_008938.2|
LFQEC[57]C[418]PHSTDR (+2)	2	1909.75	1910.74	NP_112553.1|,NP_112552.1|,NP_002131.2|
TGVHHYSGNNIELGTAC[418]GK (+4)	2	2375.04	2376.25	NP_000980.1|
M[16]LTEAIM[16]HDC[418]VVK (+3)	2	1938.83	1489.82	NP_937884.1|,NP_886553.3|,NP_004944.3|,NP_937885.1|,NP_937887.1|,NP_001181875.1|,NP_001181876.1|,NP_001185730.1|,NP_001185731.1|,NP_003751.2|
LAELEEFINGPNNAHIQQVGDRC[418]YDEK (+4)	2	3519.58	3521.47	NP_004850.1|
C[57]ESAPGC[418]GVWQRPVIDNPNYK (+3)	2	2807.23	2333.6	NP_001737.1|,NP_001019820.1|
TLLLC[418]GYPNVGK (+2)	2	1694.82	1695.66	NP_036473.2|
TIIPLISQC[418]TPK (+3)	2	1730.87	1313.61	NP_005909.2|
NPFLSLAAC[418]VM[16]PSR (+3)	2	1938.88	1505.8	NP_006827.1|
VNQAIWLLC[418]TGAR (+3)	2	1861.9	1862.83	NP_001000.2|
AVYSTNC[418]PVWEEAFR (+3)	2	2188.93	2190.08	NP_056107.1|,NP_001171725.1|
NC[418]LTNFHGM[16]DLTR (+2)	2	1954.81	1955.85	NP_000997.1|
YSC[418]QEGDKFK (+3)	2	1621.65	1204.31	NP_005969.1|
GFC[418]FITFKEEEPVK (+3)	2	2090.95	2092.06	NP_001003810.1|,NP_002129.2|,NP_112738.1|,NP_112737.1|
NAGNC[418]LSPAVIVGLLK (+3)	2	1986.01	1987.01	NP_006614.2|
LAAQSC[418]ALSLVR (+2)	2	1648.81	1649.6	NP_001348.2|
LVVPASQC[418]GSLIGK (+2)	2	1788.89	1789.78	NP_001092090.1|,NP_005007.2|,NP_114366.1|,NP_001122383.1|,NP_001122384.1|,NP_001122385.1|,NP_001122386.1|,NP_001123613.1|,NP_065389.2|
SIQFVDWC[418]PTGFK (+2)	2	1944.85	1527.74	NP_005991.1|,NP_006073.2|
LSQERPGVLLNQFPC[418]ENLLTVK (+3)	2	2915.47	2917.03	NP_055955.1|
YLAEVAC[418]GDDRK (+3)	2	1756.75	1757.61	NP_006817.1|
VAC[418]IGAWHPAR (+2)	2	1597.73	1598.51	NP_005052.1|,NP_000958.1|,NP_001029025.1|
TSC[418]ALTIHAIGR (+3)	2	1659.79	1660.58	NP_001073867.1|
LLEC[418]PWLQQQHK (+2)	2	1939.91	1940.9	NP_002215.2|
SSVNC[418]PFSSQDM[16]K (+3)	2	1862.73	1863.7	NP_001348.2|
QTPLTC[418]SGHTR (+3)	2	1617.7	1618.46	NP_009109.3|
GM[16]GM[16]NSPELLLLVENC[418]PK (+3)	2	2394.07	2395.45	NP_004810.2|
YC[418]YYNETHK (+3)	2	1637.63	1220.31	NP_078938.2|,NP_001137502.1|
ITVPFLEQC[418]PIR (+3)	2	1832.9	1833.83	NP_002717.3|
KC[418]M[16]LDAALATLNTHGK (+3)	2	2119.99	2121.12	NP_006827.1|
IHM[16]GSC[418]AENTAK (+3)	2	1694.69	1695.55	NP_000010.1|
HC[418]LLTC[57]EEC[57]K (+2)	2	1709.67	1710.58	NP_001014446.1|
TIIPLISQC[418]TPK (+2)	2	1730.87	1731.74	NP_005909.2|
LTDC[418]VVM[16]RDPASK (+3)	2	1867.83	1868.81	NP_002128.1|,NP_112533.1|
VGEATETALTC[418]LVEK (+3)	2	1980.92	1981.9	NP_777614.1|,NP_777615.1|,NP_777613.1|,NP_777616.1|,NP_777618.1|,NP_005164.2|,NP_777617.1|,NP_733765.1|,NP_001672.1|
LNISFPATGC[418]QK (+2)	2	1695.77	1696.61	NP_001001.2|
MRPGVAC[418]SVSQAQK (+3)	2	1878.85	1879.84	NP_000652.2|,NP_001020092.1|
NTPLC[418]DSFVFR (+2)	2	1715.74	1716.6	NP_004448.2|,NP_976251.1|
QIC[418]VVM[16]LESPPK (+2)	2	1776.82	1777.78	NP_001092090.1|,NP_114366.1|,NP_001122384.1|,NP_001122386.1|,NP_065389.2|
ADFC[418]IIHYAGK (+3)	2	1654.73	1237.43	NP_001242941.1|,NP_002464.1|,NP_005955.3|,NP_001243024.1|
SGALLAC[418]GIVNSGVR (+2)	2	1833.89	1834.78	NP_002799.3|
VIQC[418]FAETGQVQK (+2)	2	1867.86	1868.79	NP_004850.1|
GLDVNKC[418]EIAR (+3)	2	1634.75	1635.53	NP_055140.1|
VVPC[418]LVTPVTGR (+2)	2	1657.83	1658.65	NP_001448.2|,NP_001157789.1|,NP_001157790.1|,NP_001157791.1|
IFC[57]C[418]HGGLSPDLQSM[16]EQIR (+3)	2	2624.13	2625.61	NP_001231903.1|,NP_002700.1|,NP_002699.1|,NP_996756.1|,NP_996759.1|,NP_002701.1|,NP_001008709.1|
ALTISNPHGC[418]R (+3)	2	1585.71	1168.33	NP_116032.1|,NP_001092099.1|,NP_001092100.1|,NP_001092097.2|,NP_001229381.1|
SC[418]YDLSC[57]HAR (+3)	2	1628.62	1629.43	NP_002038.2|
TALNHC[418]NLC[57]R (+3)	2	1618.68	1144.33	NP_056375.2|,NP_570844.1|,NP_570845.1|,NP_570846.1|,NP_570847.2|,NP_570848.1|,NP_570849.2|,NP_570850.2|
TVAKC[418]QVTPR (+3)	2	1519.73	1520.44	NP_001193496.1|,NP_005522.2|
GVLFGVPGAFTPGC[418]SK (+2)	2	1953.91	1536.79	NP_036226.1|,NP_857634.1|
VM[16]AEANHFIDLSQIPC[418]NGK (+3)	2	2520.12	2087.38	NP_858058.1|,NP_858059.1|
VDTC[418]HTPFGK (+3)	2	1521.64	1522.37	NP_000170.1|
QC[57]LPSLDLSC[418]K (+2)	2	1680.73	1681.59	NP_008835.5|,NP_001075109.1|
QC[57]LPSLDLSC[418]K (+3)	2	1680.73	1681.59	NP_008835.5|,NP_001075109.1|
EKLC[418]FLDKVEPHATIAEIK (+4)	2	2601.3	2184.55	NP_612510.1|
AVASQLDC[418]NFLK (+2)	2	1725.79	1726.63	NP_002797.3|
GVLM[16]YGPPGC[418]GK (+2)	2	1611.69	1612.55	NP_006494.1|,NP_694546.1|
VVNEINIEDLC[418]LTK (+3)	2	2019.96	2020.98	NP_001008389.1|
LLTFNPTYC[418]ALK (+2)	2	1800.86	1383.65	NP_004779.2|,NP_001191006.1|
AIANEC[418]QANFISIK (+2)	2	1938.9	1939.87	NP_009057.1|
AESHNDC[418]PVR (+3)	2	1544.61	1127.19	NP_003355.1|,NP_853628.1|
AQGTHVLVHC[418]K (+4)	2	1609.75	1192.39	NP_060327.3|
VM[16]SQNFTNC[418]HTK (+2)	2	1842.75	1843.72	NP_005745.1|,NP_938405.1|
NILVNSNLVC[418]K (+2)	2	1633.8	1634.58	NP_001073917.2|,NP_004432.1|,NP_004431.1|,NP_004429.1|,NP_775926.1|,NP_004434.2|,NP_004433.2|,NP_004435.3|,NP_004422.2|,NP_059145.2|
KPEVTC[418]TLEDK (+3)	2	1679.75	1680.56	NP_079139.4|,NP_001006936.1|,NP_001006938.1|
INEAVEC[418]LLSLK (+2)	2	1748.85	1749.71	NP_004437.2|
NVIQEPRPC[418]GGPHTAVGTK (+4)	2	2378.13	2379.34	NP_065171.2|,NP_001129389.1|
LPSALTATAC[418]K (+2)	2	1492.71	1493.41	NP_055970.1|
EKPVC[418]GTTYK (+3)	2	1542.68	1125.3	NP_005889.3|,NP_976240.1|
NC[418]IVLIDSTPYR (+2)	2	1810.84	1811.74	NP_001003.1|
YSC[418]QEGDKFK (+2)	2	1621.65	1622.44	NP_005969.1|
GAPEGVIDRC[418]THIR (+3)	2	1940.9	1523.72	NP_733765.1|,NP_001672.1|
VDVFREDLC[418]TK (+3)	2	1741.78	1324.5	NP_788955.1|,NP_006254.1|
NTPSEPIHC[418]IVWAK (+3)	2	2011.93	1594.83	NP_005490.1|
SPNLSKC[418]GEELGR (+3)	2	1806.8	1807.67	NP_002803.2|
SAPHLPGLM[16]C[418]LLR (+3)	2	1840.88	1407.75	NP_055204.2|
VC[57]ENIPIVLC[418]GNK (+2)	2	1875.87	1876.85	NP_006316.1|
HEQNIDC[418]GGGYVK (+3)	2	1836.76	1419.52	NP_004334.1|
VKC[418]LNNLAASQLK (+3)	2	1818.91	1819.81	NP_036313.3|
KLC[418]LNIC[57]VGESGDR (+3)	2	1980.89	1981.9	NP_000966.2|,NP_001186731.1|
SLC[418]SEAVPLLVK (+2)	2	1675.83	1258.53	NP_036548.1|,NP_001230131.1|
GM[16]PPGGGGEVVFSC[418]PVR (+3)	2	2078.9	2080.03	NP_005763.3|
LFQEC[57]C[418]PHSTDR (+3)	2	1909.75	1910.74	NP_112553.1|,NP_112552.1|,NP_002131.2|
LIC[57]C[418]DILDVLDK (+2)	2	1836.85	1837.81	NP_006752.1|
GC[418]GTVLLSGPR (+2)	2	1476.69	1477.37	NP_000970.1|,NP_001257419.1|
LNEC[418]VDHTPK (+3)	2	1572.67	1573.41	NP_004823.1|,NP_001177931.1|,NP_001177932.1|
EVLTEDKC[418]LQR (+3)	2	1750.8	1751.64	NP_695012.1|,NP_003325.2|
IM[16]EKC[418]TLPLTGK (+3)	2	1766.84	1767.79	NP_000427.1|
VM[16]TLC[418]PIETLR (+2)	2	1708.8	1709.71	NP_444504.1|
AITIAGIPQSIIEC[418]VK (+3)	2	2073.06	2074.13	NP_001092090.1|,NP_005007.2|,NP_114366.1|,NP_001122383.1|,NP_001122384.1|,NP_001122385.1|,NP_001122386.1|
NKPFFDIC[418]TSR (+3)	2	1744.77	1745.64	NP_003791.3|
EKPVC[418]GTTYK (+2)	2	1542.68	1125.3	NP_005889.3|,NP_976240.1|
INPIC[418]NDHYR (+3)	2	1661.71	1662.51	NP_060962.2|
VC[418]VEHHTFYR (+4)	2	1707.73	1290.45	NP_001186318.1|,NP_001129027.1|,NP_001186317.1|,NP_001239589.1|,NP_001422.1|,NP_001129026.1|
TIC[418]SHVQNM[16]IK (+3)	2	1706.76	1707.65	NP_000652.2|,NP_001020092.1|
EIGQKC[418]PQELSR (+3)	2	1804.82	1805.69	NP_055680.3|
GVLFGVPGAFTPGC[418]SK (+3)	2	1953.91	1954.92	NP_036226.1|,NP_857634.1|
TVLQM[16]DELKC[418]R (+3)	2	1768.79	1335.59	NP_056175.3|
GC[418]HLLVATPGR (+2)	2	1540.73	1541.46	NP_001180345.1|,NP_001180346.1|,NP_001347.3|,NP_004651.2|,NP_001116137.1|
GSQFGQSC[418]C[57]LR (+2)	2	1659.66	1660.49	NP_004437.2|
AQGTHVLVHC[418]K (+3)	2	1609.75	1610.52	NP_060327.3|
FNEC[418]GHVLYADIK (+3)	2	1925.84	1926.83	NP_005959.2|,NP_112480.2|
AC[418]FHC[57]ETC[57]K (+2)	2	1572.56	1041.23	NP_006139.1|
LVILANNC[418]PALR (+3)	2	1713.87	1714.71	NP_000980.1|
VC[418]ENIPIVLC[57]GNK (+3)	2	1875.87	1876.85	NP_006316.1|
SEGKC[418]FSVLGFC[57]K (+3)	2	1878.81	1879.81	NP_066964.1|
YKVC[418]NYGLTFTQK (+3)	2	1981.91	1982.93	NP_001129166.1|,NP_005653.3|
VELC[418]SFSGYK (+2)	2	1549.66	1550.42	NP_000977.1|
IAVAAQNC[418]YK (+2)	2	1497.67	1498.39	NP_000356.1|,NP_001152759.1|
KC[418]GIQDTNSK (+2)	2	1510.65	1511.34	NP_054862.1|,NP_001254635.1|
EVC[418]GFAPYER (+2)	2	1587.65	1588.43	NP_378669.1|,NP_056229.2|
ALRPGDPGFC[418]AR (+3)	2	1676.76	1677.57	NP_060439.2|
IHEGC[418]EEPATHNALAK (+2)	2	2136.94	2138	NP_004850.1|
STC[418]SLTPALAAHFSENLIK (+3)	2	2420.15	2421.41	NP_567823.1|,NP_057712.2|
SC[418]YDLSC[57]HAR (+2)	2	1628.62	1629.43	NP_002038.2|
HELQANC[418]YEEVK (+3)	2	1879.79	1880.71	NP_005498.1|
VIVKC[418]PTSGR (+3)	2	1476.72	1477.41	NP_036232.2|
FC[418]LSKPGVYK (+3)	2	1558.73	1559.51	NP_001004067.1|,NP_001004060.1|,NP_775885.1|,NP_055102.3|
ETGAASFLC[418]R (+2)	2	1471.62	1472.31	NP_003282.2|
GYGLFAGPC[418]K (+2)	2	1429.62	1430.31	NP_008835.5|,NP_001075109.1|
FLLQEEISKC[418]K (+3)	2	1754.84	1337.58	NP_001219.2|,NP_203519.1|,NP_203520.1|,NP_203522.1|,NP_001073593.1|,NP_001073594.1|
GHNQPC[418]LLVGSGR (+3)	2	1754.8	1755.64	NP_004332.2|
SC[418]LLHQFTEK (+2)	2	1622.72	1623.51	NP_057406.2|
DPHLAC[418]VAYER (+2)	2	1690.72	1691.55	NP_004850.1|,NP_001826.3|,NP_009029.3|
AALEALGSC[418]LNNK (+2)	2	1720.79	1721.62	NP_005403.2|,NP_001159828.1|,NP_001159829.1|,NP_001159830.1|,NP_001159831.1|
ITGLC[418]PFGPR (+2)	2	1477.68	1478.4	NP_112223.1|
AVLGEVKLC[418]EK (+3)	2	1605.79	1606.57	NP_001395.1|
ITVPFLEQC[418]PIR (+2)	2	1832.9	1833.83	NP_002717.3|
FSIQTM[16]C[418]PIEGEGNIAR (+3)	2	2299.01	2300.25	NP_006294.2|
VIVKC[418]PTSGR (+2)	2	1476.72	1059.28	NP_036232.2|
LC[418]SAHGVLVPGGFGVR (+3)	2	1985.96	1986.97	NP_001896.2|
FEELC[418]SDLFR (+2)	2	1675.7	1676.53	NP_002146.2|,NP_005337.2|,NP_005336.3|
ESSC[418]LALNDLLR (+2)	2	1750.8	1751.64	NP_001073867.1|
LM[16]C[418]PQEIVDYIADKK (+3)	2	2199.01	2200.21	NP_004994.1|
HPLTQELKEC[418]EGIVPVPLAEK (+4)	2	2747.37	2748.83	NP_115865.1|
YSYVC[418]PDLVK (+2)	2	1603.71	1186.38	NP_005712.1|
DVIEEYFKC[418]K (+3)	2	1690.74	1691.59	NP_001007.2|
HEQNIDC[418]GGGYVK (+2)	2	1836.76	1419.52	NP_004334.1|
TAGQTGM[16]C[418]GGVR (+2)	2	1570.63	1571.42	NP_060531.2|
SLETC[418]M[16]YDHK (+3)	2	1659.64	1226.38	NP_001367.2|
VEEIAASKC[418]R (+3)	2	1522.69	1523.4	NP_000971.1|
NTPSFLIAC[418]NK (+2)	2	1624.74	1625.53	NP_067026.3|
RDLM[16]AC[418]AQTGSGK (+3)	2	1770.75	1771.65	NP_001160005.1|,NP_001180345.1|,NP_001180346.1|,NP_001347.3|,NP_004651.2|,NP_001116137.1|,NP_001160006.1|,NP_001136021.1|,NP_077726.1|
AALQEELQLC[418]K (+3)	2	1662.77	1663.58	NP_004095.4|
AGLNC[418]STENM[16]PIK (+2)	2	1810.77	1811.71	NP_004085.1|
IIAIANYVC[418]R (+2)	2	1552.75	1553.51	NP_001193496.1|,NP_005522.2|
LHSLQPHAC[418]FR (+4)	2	1725.79	1308.51	NP_001367.2|
LC[418]DSYEIRPGK (+3)	2	1697.75	1698.58	NP_005817.1|,NP_001095867.1|,NP_001095868.1|,NP_001095869.1|
NLQDAM[16]QVC[418]R (+2)	2	1610.66	1177.36	NP_005989.3|,NP_001008800.1|
FAC[418]HSASLTVR (+2)	2	1608.72	1609.49	NP_031389.3|,NP_001138880.1|,NP_001138881.1|,NP_001138882.1|
AAQHGVC[418]SVLK (+3)	2	1529.71	1112.3	NP_055994.2|,NP_001138586.1|
YM[16]AC[57]C[418]LLYR (+2)	2	1625.65	1626.57	NP_005991.1|,NP_006073.2|,NP_079079.1|,NP_001165335.1|,NP_116093.1|,NP_006000.2|,NP_001257328.1|,NP_001257329.1|
YM[16]AC[418]C[57]LLYR (+2)	2	1625.65	1626.57	NP_005991.1|,NP_006073.2|,NP_079079.1|,NP_001165335.1|,NP_116093.1|,NP_006000.2|,NP_001257328.1|,NP_001257329.1|
LLLNC[418]PLSGEK (+2)	2	1603.77	1186.42	NP_055592.2|
NETLGGTC[57]LNVGC[418]IPSK (+3)	2	2179.97	2181.1	NP_000099.2|
VKC[418]SGPGLSPGM[16]VR (+2)	2	1820.84	1387.67	NP_001447.2|,NP_001104026.1|
IC[418]IQAILQDKPK (+3)	2	1786.91	1787.8	NP_001077059.1|,NP_060197.4|
ATVFLNPAAC[418]K (+2)	2	1551.72	1552.48	NP_060708.1|
AC[418]SAIHAVNLR (+3)	2	1571.73	1572.47	NP_002009.1|,NP_001243193.1|,NP_001243194.1|
LLIEKC[418]NTVK (+3)	2	1577.79	1578.56	NP_005780.2|,NP_001253974.1|
NQALFPAC[418]VLK (+2)	2	1620.78	1621.58	NP_004930.1|
INEAVEC[418]LLSLK (+3)	2	1748.85	1749.71	NP_004437.2|
QYQAGQTVTC[418]FLK (+3)	2	1903.86	1486.69	NP_055791.1|
KC[418]YEM[16]ASHLR (+4)	2	1670.7	1237.45	NP_005013.1|
M[16]C[418]SLAVVNLGTHK (+3)	2	1805.83	1806.78	NP_056536.2|
AHEILPNLVC[57]C[418]SAK (+3)	2	1971.9	1497.78	NP_006576.2|
AKPPADPAAAASPC[418]R (+3)	2	1839.84	1840.74	NP_071334.1|
FIC[418]GTQSIHK (+3)	2	1550.7	1133.32	NP_055106.1|,NP_001165161.1|
VAHVEVAPFYTC[418]K (+3)	2	1880.86	1881.83	NP_004727.2|,NP_001129141.1|
KC[418]AC[57]ASHVAK (+4)	2	1491.64	1017.23	NP_004386.2|,NP_543157.1|
TVAKC[418]QVTPR (+2)	2	1519.73	1520.44	NP_001193496.1|,NP_005522.2|
NC[418]LALADDKK (+2)	2	1507.68	1508.38	NP_004884.1|,NP_613075.1|,NP_613258.2|,NP_001035248.1|
KKPC[418]ITYGLR (+3)	2	1595.8	1596.58	NP_060705.2|,NP_001161971.1|
IAILTC[418]PFEPPKPK (+2)	2	1971	1972.04	NP_036205.1|
SGSAAQAEGLC[418]K (+2)	2	1538.65	1539.35	NP_005778.1|
QLAALNC[418]SVR (+2)	2	1491.7	1492.39	NP_009103.2|,NP_705931.1|
SVC[418]LIGDKEQR (+3)	2	1664.77	1665.55	NP_003592.3|
LNISFPATGC[418]QK (+3)	2	1695.77	1696.61	NP_001001.2|
EKC[418]LLPLQLALESK (+3)	2	2002.03	1584.92	NP_065073.3|
NKVC[418]TEKPVK (+3)	2	1562.76	1563.5	NP_055718.4|
VVPC[418]LVTPVTGR (+3)	2	1657.83	1658.65	NP_001448.2|,NP_001157789.1|,NP_001157790.1|,NP_001157791.1|
SSTETC[418]YSAIPK (+2)	2	1703.72	1286.41	NP_001448.2|,NP_001157789.1|,NP_001157790.1|,NP_001157791.1|
DPHLAC[418]VAYER (+3)	2	1690.72	1691.55	NP_004850.1|,NP_001826.3|,NP_009029.3|
SLC[57]IPFKPLC[418]ELQPGAK (+4)	2	2318.13	1844.25	NP_004437.2|
AVAILC[418]NHQR (+2)	2	1541.72	1542.45	NP_003277.1|
NILVNSNLVC[418]K (+3)	2	1633.8	1634.58	NP_001073917.2|,NP_004432.1|,NP_004431.1|,NP_004429.1|,NP_775926.1|,NP_004434.2|,NP_004433.2|,NP_004435.3|,NP_004422.2|,NP_059145.2|
GPAGNNDC[418]R (+2)	2	1320.5	1321.06	NP_008855.1|,NP_001071634.1|
YIC[418]QKPSIQK (+3)	2	1624.77	1207.44	NP_113584.3|
FNAHGDANTIVC[418]NSK (+3)	2	2007.86	1590.72	NP_002296.1|
KPNVGC[418]QQDSEELLK (+3)	2	2104.96	2106	NP_060697.4|
SSLQSQC[418]LNEVLK (+2)	2	1865.87	1448.64	NP_001367.2|
KPSYAEIC[418]QR (+3)	2	1611.72	1612.49	NP_055970.1|
AVDALLTHC[418]K (+3)	2	1487.69	1488.39	NP_056474.2|
NM[16]MAAC[418]DPR (+2)	2	1441.52	1442.32	NP_006078.2|,NP_115914.1|,NP_821133.1|,NP_817124.1|,NP_821080.1|,NP_006079.1|,NP_001060.1|,NP_006077.2|,NP_001184110.1|
VAC[418]ITEQVLTLVNK (+3)	2	1947.98	1948.96	NP_002941.1|
GLC[418]AIAQAESLR (+3)	2	1648.77	1649.55	NP_001247435.1|,NP_000996.2|,NP_001243731.1|
EYVKC[418]LENR (+3)	2	1570.69	1571.44	NP_898829.1|,NP_898830.1|,NP_874386.1|,NP_874389.1|,NP_874390.1|,NP_874392.1|,NP_898831.1|,NP_005162.1|,NP_604391.1|,NP_004370.1|
VQYPQSQAC[418]K (+3)	2	1568.68	1151.29	NP_001367.2|
NC[418]MTDLLAK (+2)	2	1425.61	1426.34	NP_005660.4|
LEGIGQFHC[418]R (+3)	2	1576.69	1159.32	NP_036222.3|
APTC[418]SLDGALPLGAQIPAVHR (+3)	2	2504.23	2505.53	NP_037373.2|
SAGAC[418]TAAAFLK (+2)	2	1527.69	1528.42	NP_056991.2|
HGVQEC[418]ILLVTQR (+3)	2	1912.93	1913.88	NP_004714.2|,NP_001155855.1|,NP_001155856.1|
ALDRC[418]SEGSFLLTTFPR (+3)	2	2330.08	2331.29	NP_031389.3|,NP_001138880.1|,NP_001138881.1|,NP_001138882.1|
KC[418]AADLGLNK (+3)	2	1449.67	1450.35	NP_005331.1|
AGSVATC[418]QAVM[16]R (+2)	2	1626.7	1627.52	NP_036601.2|
AC[418]VGNAYHK (+3)	2	1379.58	962.084	NP_009103.2|,NP_705931.1|
FLGM[16]HPC[418]ER (+3)	2	1522.62	1089.29	NP_057212.1|
LSC[418]PITALGR (+2)	2	1447.7	1030.24	NP_116045.2|
AETAANRIC[418]K (+2)	2	1493.68	1494.36	NP_004915.2|,NP_001093.1|,NP_001123476.1|,NP_001123477.1|,NP_001095.1|,NP_001245300.1|,NP_001094.1|
SFGAEEHEVC[418]R (+3)	2	1680.67	1681.47	NP_000535.3|,NP_061313.2|
SC[418]LLLQFTDKR (+3)	2	1740.83	1741.69	NP_002856.1|,NP_116235.2|
IGNC[418]PFSQR (+2)	2	1438.61	1439.28	NP_001279.2|,NP_058625.2|,NP_001242952.1|,NP_001107558.1|,NP_444507.1|,NP_039234.1|
TEM[16]PC[418]QALVR (+2)	2	1580.68	1581.49	NP_055571.2|,NP_001008938.1|
KPDSVSLHC[418]R (+3)	2	1558.7	1559.43	NP_055844.2|,NP_001139332.1|,NP_001139333.1|
LEKC[418]GEDDETIPSEYR (+3)	2	2300.96	2302.11	NP_775083.1|,NP_001035905.1|,NP_001177371.1|
LEGIGQFHC[418]R (+2)	2	1576.69	1159.32	NP_036222.3|
PVIAC[418]SVTIK (+2)	2	1447.72	1448.41	NP_001003796.1|,NP_004999.1|
SVSVTAAGQC[418]R (+2)	2	1495.65	1496.33	NP_005329.3|,NP_001230127.1|
KGC[418]VITISGR (+2)	2	1450.71	1451.38	NP_863655.1|,NP_863656.1|,NP_009205.3|,NP_863654.1|
VAQLC[418]DFNPK (+2)	2	1551.69	1552.44	NP_009028.1|,NP_001825.1|
ELEKVC[418]NPIITK (+2)	2	1803.89	1386.66	NP_006588.1|
SNC[418]KPSTFAYPAPLEVPK (+3)	2	2366.11	2367.36	NP_002798.2|
AIANEC[418]QANFISIK (+3)	2	1938.9	1939.87	NP_009057.1|
VGTEC[418]GNQK (+2)	2	1352.55	1353.14	NP_001447.2|,NP_001104026.1|
TSAPITC[418]ELLNK (+2)	2	1706.8	1707.63	NP_001367.2|
GALEGSSC[418]PFR (+3)	2	1540.64	1123.24	NP_002125.3|,NP_001120677.1|,NP_001120678.1|,NP_001120676.1|
IIAIANYVC[418]R (+3)	2	1552.75	1553.51	NP_001193496.1|,NP_005522.2|
IGAFGYM[16]EC[418]SAK (+2)	2	1709.69	1276.48	NP_001655.1|
ADVAGPRPC[418]QR (+3)	2	1586.71	1587.45	NP_008863.3|,NP_599031.1|,NP_599032.2|,NP_001193946.1|,NP_001193947.1|
ILDKC[418]NEIINWLDK (+3)	2	2134.02	2135.13	NP_006588.1|
AAC[418]LPLPGYR (+3)	2	1477.68	1060.27	NP_002289.2|
AC[418]ANPAAGSVILLENLR (+3)	2	2129.04	1711.98	NP_000282.1|
GLSNLFLSC[418]PIPK (+2)	2	1805.88	1388.67	NP_057231.1|
VENLFNEKC[418]GEALGLK (+3)	2	2181.02	1764.01	NP_001157108.1|,NP_001509.3|,NP_127492.1|,NP_127493.1|,NP_127494.1|
AC[418]VGNAYHK (+2)	2	1379.58	1380.21	NP_009103.2|,NP_705931.1|
GALEGSSC[418]PFR (+2)	2	1540.64	1541.37	NP_002125.3|,NP_001120677.1|,NP_001120678.1|,NP_001120676.1|
DLNYC[418]FSGM[16]SDHR (+2)	2	1977.74	1978.79	NP_005511.1|,NP_062543.1|,NP_001244222.1|,NP_001027565.1|
VAGINAC[418]GR (+2)	2	1277.56	1278.12	NP_005325.2|
SLLINAVEASC[418]IR (+2)	2	1805.88	1806.76	NP_722546.1|,NP_008838.2|,NP_037460.2|
SLSGSSPC[418]PK (+2)	2	1379.58	1380.21	NP_057417.3|
NC[418]LNPQFSK (+2)	2	1467.63	1050.19	NP_003900.1|
VEEIAASKC[418]R (+2)	2	1522.69	1523.4	NP_000971.1|
LQSGIC[418]HLFR (+3)	2	1590.74	1591.52	NP_001340.2|
AAGC[418]DFTNVVK (+2)	2	1541.66	1542.4	NP_005827.1|
FC[418]ADLVEHLK (+3)	2	1591.72	1174.37	NP_064585.1|
DSNNLC[418]LHFNPR (+2)	2	1846.79	1847.69	NP_002296.1|
ATVFLNPAAC[418]K (+3)	2	1551.72	1552.48	NP_060708.1|
ILDILGETC[418]K (+2)	2	1521.72	1522.45	NP_002958.2|,NP_001188267.1|,NP_001188268.1|,NP_001188269.1|,NP_055464.1|
TQKC[418]LQTLLDTK (+3)	2	1808.88	1809.76	NP_006827.1|
VIC[418]ILSHPIK (+3)	2	1539.79	1122.42	NP_001485.2|,NP_001108628.1|
SVC[418]LIGDKEQR (+2)	2	1664.77	1665.55	NP_003592.3|
AC[418]PRPEGLNFQDLK (+3)	2	2004.92	1587.8	NP_002937.1|
GLSSLLC[418]NFTK (+2)	2	1599.74	1600.52	NP_008835.5|,NP_001075109.1|
LKPEYDIM[16]C[418]K (+3)	2	1672.73	1239.5	NP_001011708.1|,NP_037473.3|
SAFLC[418]GVM[16]K (+2)	2	1388.59	955.196	NP_006363.4|,NP_001153148.1|,NP_001153147.1|,NP_001153146.1|,NP_001153149.1|,NP_005817.1|,NP_001095868.1|
NC[418]LALADDKK (+3)	2	1507.68	1508.38	NP_004884.1|,NP_613075.1|,NP_613258.2|,NP_001035248.1|
GLLPGC[418]VYHVQLK (+3)	2	1843.91	1426.73	NP_001004067.1|,NP_001004060.1|,NP_775885.1|,NP_055102.3|
QRPGQQVATC[418]VR (+3)	2	1759.82	1760.66	NP_009089.4|,NP_001007554.1|,NP_001123995.1|,NP_001229820.1|,NP_001229821.1|,NP_001229822.1|
VLTM[16]PETC[418]R (+2)	2	1482.63	1483.39	NP_001177966.1|,NP_002798.2|
VDLSQPLIATC[418]R (+2)	2	1732.83	1315.54	NP_003303.2|,NP_001257412.1|
KNC[418]PHIVVGTPGR (+3)	2	1794.87	1795.75	NP_004631.1|,NP_542165.1|
AVYTQDC[418]PLAAAK (+2)	2	1767.8	1768.67	NP_001596.2|
STAC[57]QM[16]LVC[418]YAK (+2)	2	1807.74	1317.6	NP_002262.3|
LIC[418]PAILNPR (+2)	2	1526.77	1527.52	NP_002881.1|,NP_072179.1|
AGQC[418]VIGLQM[16]GTNK (+2)	2	1852.83	1853.8	NP_004359.1|
KYEDIC[418]PSTHNM[16]DVPNIK (+3)	2	2537.1	2538.49	NP_001093162.1|,NP_001137232.1|,NP_001961.1|,NP_001137233.1|,NP_001137234.1|,NP_065123.1|
ALQNC[418]PWAK (+2)	2	1447.64	1030.2	NP_060440.2|
SLTIAEFKC[418]K (+3)	2	1556.74	1557.5	NP_001272.2|
SSGC[418]FPNM[16]AAK (+2)	2	1545.61	1112.28	NP_003925.1|
TC[418]TDIKPEWLVK (+3)	2	1849.87	1850.81	NP_001349.2|
HM[16]SEFM[16]EC[418]NLNELVK (+3)	2	2272.93	2274.23	NP_683877.1|,NP_002777.1|
LLPAITILGC[418]R (+2)	2	1586.83	1587.61	NP_995319.1|,NP_037467.2|
KAVVVC[418]PKDEDYK (+3)	2	1910.89	1493.72	NP_004492.2|,NP_114032.2|
LLIEKC[418]NTVK (+2)	2	1577.79	1578.56	NP_005780.2|,NP_001253974.1|
GVEIC[418]IATPGR (+2)	2	1532.71	1533.43	NP_004387.1|,NP_006377.2|,NP_001091974.1|
LHSVC[418]TLSK (+3)	2	1404.65	987.175	NP_000364.1|
KC[418]PFIVALNK (+3)	2	1549.78	1550.55	NP_056988.3|
GLC[418]GAIHSSIAK (+2)	2	1573.74	1574.49	NP_005165.1|,NP_001001973.1|
YDDM[16]ATC[418]M[16]K (+2)	2	1526.52	1077.25	NP_006817.1|
QM[16]YC[418]VFNR (+2)	2	1493.59	1494.38	NP_004701.1|
FSPNSSNPIIVSC[418]GWDK (+3)	2	2268	1851.04	NP_006089.1|
AVLAQLGC[418]PIK (+2)	2	1529.77	1530.52	NP_733840.1|,NP_078894.2|
SVHYC[418]PATK (+2)	2	1422.61	1005.15	NP_002379.3|,NP_001257401.1|
TTLC[418]VSILER (+2)	2	1551.74	1552.48	NP_005038.1|,NP_001257356.1|
NNTQVLINC[418]R (+3)	2	1591.72	1592.46	NP_004588.1|,NP_808210.2|
DKVNC[418]SFYFK (+3)	2	1667.71	1250.42	NP_659424.2|,NP_001035515.1|,NP_006749.1|,NP_001020374.1|
NC[418]FASVFEK (+2)	2	1461.61	1462.31	NP_690601.1|,NP_005722.1|
ATAVSRPC[418]AGR (+3)	2	1505.69	1088.24	NP_060557.3|,NP_001162023.1|
SSLQSQC[418]LNEVLK (+3)	2	1865.87	1448.64	NP_001367.2|
TSESLC[418]QNNM[16]VILK (+2)	2	2012.9	2013.96	NP_003391.1|
RLC[418]QENQWLR (+3)	2	1762.8	1763.66	NP_958929.1|,NP_958930.1|,NP_958931.1|,NP_612352.1|,NP_005543.2|,NP_891553.2|,NP_001123579.1|
AIC[418]IDPAYSK (+2)	2	1497.66	1498.39	NP_003012.1|
AVASQLDC[418]NFLK (+3)	2	1725.79	1726.63	NP_002797.3|
NIDPKPC[418]TPR (+2)	2	1557.71	1140.31	NP_061832.2|,NP_733829.1|
QELGIC[418]PAVK (+2)	2	1474.69	1475.4	NP_004332.2|
RC[418]LYASVLTAQPR (+3)	2	1894.92	1895.86	NP_001952.1|
TTSQLC[418]WPLLK (+3)	2	1706.82	1289.54	NP_065801.1|
M[16]LSAVSQQVQC[418]IQEALR (+3)	2	2337.09	2338.34	NP_001367.2|
KETGAASFLC[418]R (+2)	2	1599.72	1182.35	NP_003282.2|
GPTKEELC[418]K (+3)	2	1421.63	1422.29	NP_001030611.1|,NP_073744.2|
VQRPC[418]TSTPM[16]IDSFVR (+3)	2	2270.03	1837.13	NP_005144.2|
FHTVSGSKC[418]EIK (+3)	2	1752.8	1335.53	NP_112556.2|,NP_004490.2|
VSPC[418]LPVLSR (+3)	2	1487.73	1070.31	NP_036448.1|
EFLFNAIETM[16]PC[418]VK (+3)	2	2074.92	1641.95	NP_001025.1|,NP_001159403.1|
ELAETIKC[418]R (+3)	2	1479.69	1062.24	NP_000170.1|
AAVPDAVGKC[418]R (+3)	2	1503.7	1504.4	NP_001153706.1|,NP_001243142.1|,NP_001153705.1|,NP_000692.2|,NP_689509.1|,NP_001243143.1|,NP_000693.1|
EC[57]GHDVTC[418]PVAK (+3)	2	1732.7	1733.58	NP_001243546.1|,NP_006650.1|,NP_001243547.1|
TC[418]VQEITAHR (+3)	2	1574.7	1575.43	NP_055389.3|,NP_001077362.1|,NP_037535.2|,NP_001034966.1|
TGSQGQC[418]TQVR (+2)	2	1581.67	1582.38	NP_001022.1|
KGEDEDKGPPC[57]GPVNC[418]NEK (+4)	2	2490.03	2016.17	NP_788955.1|,NP_006254.1|
TTSQLC[418]WPLLK (+2)	2	1706.82	1707.67	NP_065801.1|
ANAAAM[16]C[418]AK (+2)	2	1283.51	850.019	NP_115571.1|,NP_620305.1|
VAEGQVTC[418]PYLPPFPAR (+3)	2	2262.06	2263.26	NP_115867.2|
ELHGQNPVVTPC[418]NK (+3)	2	1952.89	1953.85	NP_008938.2|
M[16]ININILSVC[418]K (+3)	2	1680.8	1247.57	NP_057226.1|
ATGHSGGGC[418]ISQGR (+3)	2	1704.71	1705.49	NP_078895.2|
SC[418]ATFSSSHR (+3)	2	1499.59	1082.15	NP_001070674.1|,NP_001070676.1|,NP_001070675.1|,NP_055748.2|,NP_057295.2|,NP_001177978.1|
LLYEALVDC[418]K (+2)	2	1583.74	1584.52	NP_006351.2|
KRC[418]PSQSSSR (+3)	2	1552.69	1553.39	NP_056130.2|
GTLTLC[418]PYHSDR (+2)	2	1779.77	1780.64	NP_002799.3|
YSYVC[418]PDLVK (+3)	2	1603.71	1186.38	NP_005712.1|
YIC[418]PHAPR (+3)	2	1373.6	956.122	NP_009191.1|
LIEDGRGC[418]EVIQEIK (+3)	2	2119.01	2120.07	NP_001035828.1|,NP_004591.2|,NP_001035829.2|,NP_001166995.1|,NP_001166996.1|
TLVTSC[418]FLVEK (+2)	2	1656.79	1239.48	NP_003144.3|,NP_001171549.1|,NP_001171550.1|,NP_001171551.1|,NP_001171552.1|
DFNTNKC[418]K (+2)	2	1386.57	1387.2	NP_004423.2|,NP_001164666.1|,NP_001164668.1|,NP_068771.2|,NP_001138246.1|,NP_001138247.1|,NP_001138248.1|,NP_001138249.1|,NP_001410.2|
LQHINPLLPAC[418]LNK (+3)	2	1991.01	1573.9	NP_079110.1|,NP_001243307.1|,NP_001243308.1|
LWNTLGVC[418]K (+2)	2	1450.67	1451.38	NP_006089.1|
ISIC[418]SSDKR (+3)	2	1425.64	1008.15	NP_004955.2|
FGEVVDC[418]TIK (+2)	2	1527.67	1110.28	NP_112556.2|,NP_004490.2|,NP_001193929.1|,NP_112740.1|
VAGC[418]SVHK (+2)	2	1217.53	799.938	NP_057951.1|,NP_031393.2|
GLSNLFLSC[418]PIPK (+3)	2	1805.88	1388.67	NP_057231.1|
GHHGC[418]PLVSPR (+3)	2	1576.7	1577.45	NP_937790.2|
AVQDLC[418]GWR (+2)	2	1464.63	1465.32	NP_061185.1|,NP_001129676.1|
QVLIRPC[418]SK (+3)	2	1460.73	1461.42	NP_001010.2|,NP_001025180.1|
LFC[418]VGFTK (+2)	2	1331.6	1332.25	NP_000997.1|
LNKC[418]GVISPR (+2)	2	1503.73	1504.44	NP_001010.2|,NP_001025180.1|
M[16]VDQLFC[418]K (+2)	2	1416.59	983.206	NP_001157108.1|,NP_001509.3|,NP_127492.1|,NP_127493.1|,NP_127494.1|
NC[418]VAIAADRR (+3)	2	1505.69	1506.37	NP_002786.2|
QKVC[418]LDIIYK (+2)	2	1639.81	1640.63	NP_008835.5|,NP_001075109.1|
KC[418]TLDQAFR (+3)	2	1498.67	1499.38	NP_005122.2|
DKFNEC[418]GHVLYADIK (+3)	2	2168.97	2170.09	NP_005959.2|,NP_112480.2|
YM[16]AC[418]C[57]LLYR (+3)	2	1625.65	1135.42	NP_005991.1|,NP_006073.2|,NP_079079.1|,NP_001165335.1|,NP_116093.1|,NP_006000.2|,NP_001257328.1|,NP_001257329.1|
GC[418]EVVVSGK (+2)	2	1294.57	1295.15	NP_001247435.1|,NP_001247436.1|,NP_000996.2|,NP_001243731.1|
KC[418]AADLGLNK (+2)	2	1449.67	1450.35	NP_005331.1|
LISEM[16]C[57]C[418]EAVKK (+3)	2	1843.8	1353.67	NP_071896.8|
IAVHC[418]TVR (+2)	2	1315.62	1316.22	NP_000966.2|,NP_001186731.1|
HTNSVIC[418]K (+2)	2	1318.58	901.042	NP_112226.2|,NP_001120968.1|
RVPC[418]AYDK (+3)	2	1368.6	951.101	NP_005198.1|
AAVPDAVGKC[418]R (+2)	2	1503.7	1504.4	NP_001153706.1|,NP_001243142.1|,NP_001153705.1|,NP_000692.2|,NP_689509.1|,NP_001243143.1|,NP_000693.1|
YHQIGSGKC[418]EIK (+4)	2	1779.81	1362.55	NP_001193929.1|,NP_112740.1|
SAC[57]GVC[418]PGR (+2)	2	1323.52	848.991	NP_000986.2|,NP_296374.1|
KELC[418]ELKPK (+3)	2	1504.74	1505.46	NP_036256.2|,NP_001137545.1|
QGFGNLPIC[418]M[16]AK (+3)	2	1711.75	1278.54	NP_005947.3|,XP_003846435.1|,NP_056255.2|,NP_001229696.1|,NP_001229697.1|
IAVHC[418]TVR (+3)	2	1315.62	898.085	NP_000966.2|,NP_001186731.1|
LYC[418]PVEFSK (+2)	2	1502.66	1085.27	NP_004586.2|,NP_001245352.1|
EC[418]ADLWPR (+2)	2	1406.57	989.106	NP_000969.1|
VDLSQPLIATC[418]R (+3)	2	1732.83	1733.67	NP_003303.2|,NP_001257412.1|
EGALC[418]EENM[16]R (+2)	2	1584.6	1585.4	NP_001952.1|
ASAGPQPLLVQSC[418]K (+2)	2	1815.86	1816.76	NP_006280.3|
HIAVFPC[418]K (+3)	2	1331.62	914.125	NP_056988.3|
VVLPC[418]NLLR (+2)	2	1443.74	1026.3	NP_000928.1|
HEC[418]M[16]APLTALVK (+3)	2	1745.79	1746.73	NP_008835.5|,NP_001075109.1|
AEC[418]M[16]LQQAER (+2)	2	1611.65	1612.47	NP_002289.2|
TTSILC[418]LAR (+2)	2	1394.67	1395.31	NP_002905.2|,NP_852136.1|
C[57]AQGC[418]IC[57]K (+2)	2	1356.51	825.032	NP_005943.1|,NP_005942.1|,NP_005941.1|,NP_005944.1|,NP_005937.2|
GYLGPEQLPDC[418]LK (+2)	2	1849.84	1850.77	NP_005909.2|
M[16]VYYGKPSC[418]K (+3)	2	1608.68	1175.42	NP_078930.3|
VAGC[418]SVHK (+3)	2	1217.53	799.938	NP_057951.1|,NP_031393.2|
ANAC[418]NSVIK (+2)	2	1336.59	1337.19	NP_733765.1|,NP_001672.1|
AC[57]GNFGIPC[418]ELR (+2)	2	1753.74	1279.49	NP_006443.1|,NP_001072992.1|,NP_001072993.1|
LPVLAGC[418]LK (+2)	2	1330.68	1331.31	NP_008835.5|,NP_001075109.1|
LKPEYDIM[16]C[418]K (+2)	2	1672.73	1673.63	NP_001011708.1|,NP_037473.3|
VC[418]ASVTFK (+2)	2	1271.57	1272.16	NP_001307.2|,NP_001243064.1|
DTIC[418]NQDER (+2)	2	1510.58	1511.26	NP_055140.1|
FDEC[418]VLDK (+2)	2	1385.56	1386.21	NP_055037.1|
PAC[418]PLFVR (+2)	2	1319.62	1320.25	NP_060596.2|
NLETFC[418]EETRR (+3)	2	1814.77	1815.64	NP_064502.9|
LQIELGKC[418]K (+3)	2	1448.72	1449.4	NP_005564.1|
KC[418]LEEQGLK (+2)	2	1464.67	1465.36	NP_001896.2|
KC[418]LEEQGLK (+3)	2	1464.67	1465.36	NP_001896.2|
M[16]GVVEC[418]AK (+2)	2	1269.52	836.032	NP_006182.2|
NIC[418]QQVNIK (+2)	2	1476.69	1477.37	NP_003741.1|
SC[418]QFVAVR (+2)	2	1326.58	1327.2	NP_004437.2|
IVGC[418]SVHK (+2)	2	1259.58	842.018	NP_776247.3|,NP_001093861.1|,NP_001093862.1|,NP_001093863.1|,NP_112604.2|,NP_004491.2|,NP_001070910.1|,NP_001070911.1|
VKC[418]SGPGLER (+2)	2	1462.67	1045.21	NP_001447.2|,NP_001104026.1|
TVFC[418]M[16]QLAAR (+2)	2	1572.69	1139.39	NP_909122.1|,NP_004893.1|,NP_001229528.1|,NP_001229529.1|,NP_001070819.1|,NP_001070820.1|,NP_060577.3|
ERIC[418]SEEER (+3)	2	1567.64	1568.35	NP_060282.1|
LGTQTFC[418]SR (+2)	2	1429.61	1012.14	NP_056107.1|,NP_001171725.1|
VDAHRC[418]IVR (+4)	2	1485.7	1068.25	NP_006351.2|
KC[418]TLDQAFR (+2)	2	1498.67	1499.38	NP_005122.2|
SIHDALC[418]VIR (+2)	2	1543.73	1126.33	NP_006421.2|,NP_001243650.1|
M[16]DC[418]LLLQHLK (+3)	2	1646.76	1213.51	NP_075050.3|
NLFEDQNTLTSIC[418]EK (+3)	2	2171.95	2173.04	NP_001307.2|,NP_001243064.1|
KAVVVC[418]PK (+2)	2	1260.64	1261.22	NP_004492.2|,NP_114032.2|
GC[418]IPTM[16]AR (+2)	2	1281.53	848.046	NP_003553.2|,NP_001158889.1|,NP_001158890.1|
YQGEHC[418]LLK (+2)	2	1507.66	1090.25	NP_886552.2|
AFC[418]EPGNVENNGVLSFIK (+3)	2	2355.07	2356.3	NP_003671.1|
SSPSIIC[418]M[16]PK (+2)	2	1495.65	1062.3	NP_055330.1|,NP_001186231.1|,NP_001186232.1|
TDGC[418]HAYLSK (+3)	2	1511.62	1512.33	NP_006358.1|,NP_001099000.1|
YRPENTPEPVSTSVSHYGAEPTTVSPC[418]PSSSAK (+4)	2	3879.74	3463.69	NP_005424.1|
EC[57]FHPYNTC[418]ITDLR (+3)	2	2185.9	1711.92	NP_689880.1|
TVKPSLSC[418]K (+3)	2	1379.66	1380.3	NP_076968.2|
IIYGGSVTGATC[418]K (+3)	2	1686.77	1687.6	NP_001244955.1|,NP_000356.1|,NP_001152759.1|
SFGAEEHEVC[418]R (+2)	2	1680.67	1681.47	NP_000535.3|,NP_061313.2|
HITGLC[418]GK (+2)	2	1245.56	1246.12	NP_057151.1|
TC[418]ILGTHHEK (+3)	2	1555.69	1556.43	NP_005329.3|,NP_001230127.1|
M[16]GVPYC[418]IIK (+2)	2	1456.66	1023.31	NP_000963.1|
DTLFC[418]YHK (+2)	2	1443.6	1026.17	NP_078938.2|,NP_001137502.1|
TDTVLILC[418]R (+2)	2	1450.69	1451.37	NP_001007215.1|,NP_055227.1|
DLLGLC[418]EQK (+2)	2	1435.65	1018.19	NP_003391.1|
LTC[418]FELAPK (+2)	2	1438.66	1439.36	NP_001193496.1|,NP_005522.2|
LLC[418]GLLAER (+2)	2	1404.69	1405.35	NP_002406.1|
EKTC[418]PLLLR (+2)	2	1489.74	1072.32	NP_005861.2|
GFC[418]FITFK (+2)	2	1379.6	962.165	NP_001003810.1|,NP_002129.2|,NP_112738.1|,NP_112737.1|
YPHPC[418]AAR (+3)	2	1331.55	914.043	NP_001230685.1|
VWNLANC[418]K (+2)	2	1364.6	1365.24	NP_006089.1|
NC[418]C[57]FEHR (+3)	2	1382.5	908.017	NP_057542.2|,XP_001126758.1|
LSPAM[16]GC[418]K (+2)	2	1239.51	806.006	NP_055738.3|,NP_001073141.1|
LLKPEC[418]VLDK (+2)	2	1574.78	1157.42	NP_006827.1|
GDAHEC[418]FVSPVAK (+3)	2	1776.76	1777.64	NP_056255.2|,NP_001229696.1|,NP_001229697.1|,NP_001229698.1|
KIC[418]AVGITK (+2)	2	1349.68	1350.31	NP_001307.2|,NP_001243064.1|
TKFENLC[418]K (+3)	2	1399.63	1400.29	NP_001017963.2|,NP_005339.3|
LPAKC[418]PGK (+2)	2	1230.59	813.02	NP_036313.3|
NSFDC[418]FKK (+2)	2	1405.58	988.118	NP_003696.2|,NP_001153682.1|,NP_055066.1|
DLC[418]NTHLM[16]R (+2)	2	1535.63	1102.29	NP_008835.5|,NP_001075109.1|
NQLTSLPSAIC[418]K (+3)	2	1691.8	1692.62	NP_002009.1|,NP_001243193.1|,NP_001243194.1|
IVGPSGAAVPC[418]K (+2)	2	1515.72	1516.45	NP_001447.2|,NP_001104026.1|
DVHNLC[418]PK (+2)	2	1342.58	925.064	NP_003175.1|
YQGEHC[418]LLK (+3)	2	1507.66	1090.25	NP_886552.2|
ASC[418]LYGQLPK (+2)	2	1496.68	1079.27	NP_000843.1|
VVSC[57]LSTC[418]IFPDK (+2)	2	1885.84	1886.84	NP_003304.1|
SSGC[418]DVNLPGVNVK (+3)	2	1805.81	1388.55	NP_001611.1|
AESHNDC[418]PVR (+2)	2	1544.61	1127.19	NP_003355.1|,NP_853628.1|
NYLEPGKEC[418]VQPATK (+2)	2	2093.96	1676.89	NP_733765.1|
VLAC[418]PFLR (+2)	2	1335.65	918.157	NP_060550.2|,NP_060154.3|,NP_001018098.1|,NP_065872.1|
FGHTFC[418]K (+3)	2	1256.51	838.973	NP_005850.1|
NC[418]IISLVTQR (+2)	2	1563.75	1564.49	NP_055100.2|
TALLDISC[418]VK (+2)	2	1479.71	1480.41	NP_075266.1|,NP_004449.1|
KIC[418]AVGITK (+3)	2	1349.68	1350.31	NP_001307.2|,NP_001243064.1|
WC[418]NEHLK (+2)	2	1346.55	929.054	NP_001449.3|,NP_001120959.1|,NP_001447.2|,NP_001104026.1|,NP_001448.2|,NP_001157789.1|,NP_001157790.1|,NP_001157791.1|
TKFENLC[418]K (+2)	2	1399.63	1400.29	NP_001017963.2|,NP_005339.3|
GLPFGC[418]TK (+2)	2	1239.54	821.984	NP_004957.1|,NP_001091678.1|,NP_001091677.1|,NP_001091675.1|,NP_001091674.1|,NP_001091676.1|
GKDYYC[418]ILGIEK (+3)	2	1818.83	1401.63	NP_008965.2|
AHIAQLC[418]EK (+3)	2	1429.65	1012.18	NP_004850.1|,NP_001826.3|,NP_009029.3|
NM[16]KC[418]SVK (+3)	2	1242.52	809.01	NP_055423.1|,NP_055191.2|,NP_001032410.1|,NP_001032409.2|
VIIVQAC[418]R (+2)	2	1318.65	1319.26	NP_001129582.1|,NP_004338.3|,NP_001129584.1|,NP_001129581.1|,NP_001216.1|,NP_150649.1|
KYC[418]LHGEAGK (+3)	2	1522.67	1105.27	NP_001093869.1|,NP_001093870.1|
KC[418]GIQDTNSK (+3)	2	1510.65	1511.34	NP_054862.1|,NP_001254635.1|
EGTALVPYGLPC[418]IR (+2)	2	1905.91	1488.75	NP_004184.1|,NP_001186307.1|,NP_001186308.1|
EEHLC[418]TQR (+3)	2	1432.59	1015.1	NP_705935.1|,NP_001036816.1|
TLSFYFPPC[418]GK (+2)	2	1676.74	1259.47	NP_005683.2|,NP_009120.1|
VSSVALC[418]K (+2)	2	1223.57	1224.11	NP_060555.2|
RC[418]AVGLVDAVK (+3)	2	1547.76	1548.49	NP_061184.1|
IIC[418]SAGLSLLAEER (+3)	2	1891.92	1892.85	NP_054783.2|
VVNSC[418]HR (+3)	2	1231.52	1232.06	NP_036205.1|
VVNSC[418]HR (+2)	2	1231.52	813.925	NP_036205.1|
GNSPPSSGEAC[418]R (+2)	2	1578.62	1579.33	NP_003482.1|,NP_001243048.1|,NP_001243049.1|
LVPC[418]ILEAAK (+2)	2	1473.74	1056.32	NP_612430.2|
FISDIANDALQHC[418]K (+3)	2	1991.89	1574.76	NP_006275.1|
ATHVAFDC[418]M[16]K (+3)	2	1555.63	1122.32	NP_060831.2|
HVLTGSADNSC[418]R (+3)	2	1676.7	1677.48	NP_003748.1|
HC[418]NM[16]VLENVK (+2)	2	1619.69	1620.53	NP_004588.1|,NP_808210.2|
LLLC[418]EHAEK (+2)	2	1472.68	1055.25	NP_060700.2|
LPAKC[418]PGK (+3)	2	1230.59	813.02	NP_036313.3|
SQIC[418]DNAALYAQK (+3)	2	1841.81	1424.58	NP_001307.2|
TVLIAC[418]NVK (+2)	2	1377.68	960.192	NP_002379.3|,NP_001257401.1|
IQSGHSLEGC[418]FQVIK (+3)	2	2062.96	1645.88	NP_060697.4|
EKDC[418]ALTVVALR (+3)	2	1734.84	1735.69	NP_057107.3|
KC[418]LSVM[16]EAK (+3)	2	1441.64	1008.26	NP_001596.2|
IGNC[418]PFSQR (+3)	2	1438.61	1021.15	NP_001279.2|,NP_058625.2|,NP_001242952.1|,NP_001107558.1|,NP_444507.1|,NP_039234.1|
VPC[418]AYDK (+2)	2	1212.49	794.915	NP_005198.1|
IKC[418]LATEK (+3)	2	1322.64	1323.24	NP_001092006.1|,NP_003472.2|
QM[16]TGKC[418]ELQR (+2)	2	1626.7	1193.4	NP_714913.1|
HPVSALM[16]EIC[418]NK (+3)	2	1774.78	1341.6	NP_620305.1|
TLHSC[418]SVR (+3)	2	1319.58	902.03	NP_057535.1|,NP_001137533.1|,NP_001137534.1|
AGSSGNSC[418]ITYQPSVSGEHK (+3)	2	2426.03	2427.25	NP_003548.1|,NP_001129108.1|,NP_001129110.1|
ALEFAPAC[418]HR (+2)	2	1531.67	1532.41	NP_003306.3|,NP_001138238.1|
M[16]M[16]IPDC[418]QRR (+3)	2	1598.65	1149.41	NP_004598.1|
WC[418]NEHLK (+3)	2	1346.55	929.054	NP_001449.3|,NP_001120959.1|,NP_001447.2|,NP_001104026.1|,NP_001448.2|,NP_001157789.1|,NP_001157790.1|,NP_001157791.1|
NREC[418]LLSAPR (+3)	2	1575.73	1576.46	NP_060230.5|
GKVC[418]FEAK (+2)	2	1298.58	881.051	NP_001073027.1|
QVLIRPC[418]SK (+2)	2	1460.73	1461.42	NP_001010.2|,NP_001025180.1|
LEVVPGC[418]R (+2)	2	1289.59	1290.18	NP_037431.3|
VC[418]EEIAIIPSK (+2)	2	1618.77	1619.56	NP_001012.1|,NP_001185986.1|
LIEKC[418]VSK (+3)	2	1336.65	919.14	NP_003850.1|
AKFENLC[418]K (+2)	2	1369.62	1370.26	NP_031381.2|
QKC[418]LAALASLR (+3)	2	1590.8	1591.56	NP_036350.2|,NP_004507.2|,NP_703194.1|,NP_060090.2|,NP_001131145.1|
VEC[418]QSHR (+2)	2	1275.51	857.935	NP_002783.1|
VEC[418]QSHR (+3)	2	1275.51	857.935	NP_002783.1|
HC[418]DLQVR (+2)	2	1287.55	1288.12	NP_003741.1|
ITEFC[418]HR (+2)	2	1322.55	1323.16	NP_000909.2|
LFQC[418]LLHR (+3)	2	1446.69	1029.26	NP_066964.1|
VDAHRC[418]IVR (+3)	2	1485.7	1486.38	NP_006351.2|
GDFC[418]IQVGR (+2)	2	1411.6	994.126	NP_001018146.1|,NP_001018148.1|,NP_001018147.1|,NP_001018149.1|,NP_000260.1|,NP_937818.1|,NP_002503.1|
AQC[418]PIVER (+2)	2	1332.6	1333.2	NP_001000.2|
NKGNEC[418]FQK (+2)	2	1484.62	1067.18	NP_006810.1|
KDGVC[418]GPPPSK (+3)	2	1501.67	1084.25	NP_060225.4|,NP_001180384.1|
APPC[418]EYKDWLTK (+2)	2	1867.83	1868.79	NP_008835.5|,NP_001075109.1|
LPADTC[418]LLEFAR (+3)	2	1765.82	1348.57	NP_079106.3|
LC[418]SGVLGTVVHGK (+3)	2	1686.82	1687.64	NP_055157.1|
VLFTC[418]FK (+2)	2	1274.58	857.071	NP_001058.2|,NP_001059.2|
RPAEIYHC[418]R (+3)	2	1561.69	1144.31	NP_054899.2|
TQAIVC[418]QQLDLTHLK (+3)	2	2128.04	2129.12	NP_002931.2|,NP_001035809.1|
KVC[418]STNDLK (+2)	2	1424.64	1007.16	NP_001609.2|
AC[418]VM[16]M[16]QGR (+2)	2	1344.51	895.125	NP_000261.2|
EEHLC[418]TQR (+2)	2	1432.59	1015.1	NP_705935.1|,NP_001036816.1|
NTHC[418]SSLPHYQK (+3)	2	1831.78	1414.55	NP_001181885.1|,NP_954659.1|,NP_061322.2|,NP_001181883.1|,NP_001181884.1|
SIEIPRPVDGVEVPGC[418]GK (+3)	2	2269.09	1852.12	NP_009210.1|,NP_001012496.1|
DRNC[418]LDPFTSR (+3)	2	1740.73	1741.57	NP_068751.4|
GLGDC[418]LVK (+2)	2	1221.55	803.967	NP_001143.2|,NP_001627.2|
NASC[418]GTR (+2)	2	1125.43	707.757	NP_006799.1|
IVFVPGC[418]SIPLTIVK (+3)	2	2003.06	2004.12	NP_002878.2|
LLSLLPLSC[418]QK (+2)	2	1631.84	1632.65	NP_066918.2|
VC[418]HAHPTLSEAFR (+2)	2	1884.84	1885.78	NP_000099.2|
RVC[418]EEIAIIPSK (+3)	2	1774.87	1775.75	NP_001012.1|,NP_001185986.1|
QLPSLAC[418]K (+2)	2	1276.59	1277.18	NP_003267.1|
PGPPTPAAAHSIPYNSC[418]R (+3)	2	2253.01	1836.04	NP_065797.2|
DLC[418]NTHLM[16]R (+3)	2	1535.63	1102.29	NP_008835.5|,NP_001075109.1|
SLLKPFC[418]AALLK (+3)	2	1720.9	1303.66	NP_055571.2|,NP_001008938.1|
GTLITHC[418]YK (+3)	2	1452.65	1453.35	NP_060542.4|
M[16]C[418]PATQK (+2)	2	1211.48	777.953	NP_002678.2|
LPFC[418]GHK (+3)	2	1218.53	800.968	NP_001028690.1|,NP_056425.1|,NP_057087.2|,NP_001028691.1|,NP_001028692.1|
SC[418]HTGLGR (+3)	2	1247.52	829.925	NP_001054.1|
HQSLQC[418]R (+2)	2	1288.54	1289.11	NP_002650.1|,NP_001005376.1|,NP_001005377.1|
FIDPFC[418]K (+2)	2	1286.55	869.038	NP_055871.1|
TDAC[418]FIR (+2)	2	1242.52	824.945	NP_002794.1|
LTDC[418]VVM[16]R (+2)	2	1369.58	936.151	NP_112420.1|,NP_002128.1|,NP_112533.1|,NP_002127.1|,NP_001011724.1|,NP_001011725.1|,NP_919223.1|
QGFGNLPIC[418]M[16]AK (+2)	2	1711.75	1278.54	NP_005947.3|,XP_003846435.1|,NP_056255.2|,NP_001229696.1|,NP_001229697.1|
EYKC[418]GDLVFAK (+3)	2	1689.75	1272.47	NP_004485.1|
HLPGVC[418]K (+3)	2	1170.53	752.925	NP_001164014.1|,NP_001164015.1|,NP_612642.2|
VLEFNC[418]R (+2)	2	1297.56	1298.15	NP_001129477.1|,NP_001129478.1|,NP_000810.1|,NP_780294.1|
M[16]PEC[418]YIR (+2)	2	1344.53	911.1	NP_036453.1|,NP_001239058.1|
AALEAC[418]HK (+2)	2	1259.54	841.975	NP_000662.3|
TAQC[418]FLR (+2)	2	1255.55	837.986	NP_006436.3|
TVGVQGDC[418]R (+2)	2	1351.56	934.029	NP_003866.1|
LC[418]PFQEK (+2)	2	1281.55	864.02	NP_005307.1|,NP_001135779.1|
LLAC[418]IASR (+2)	2	1263.61	1264.18	NP_001003.1|
YNFHGTAEQDLPFC[418]K (+3)	2	2186.92	1769.93	NP_004374.1|,NP_001120662.1|
RVC[418]TNPVDR (+3)	2	1476.66	1477.33	NP_036219.2|,NP_001116295.1|
M[16]SC[418]M[16]DNK (+2)	2	1277.42	827.99	NP_001447.2|,NP_001104026.1|
YKC[418]GISK (+3)	2	1215.54	797.962	NP_055703.1|,NP_001035109.1|
LKDC[418]M[16]QK (+3)	2	1298.55	865.073	NP_036222.3|
KC[418]PFIVALNK (+2)	2	1549.78	1550.55	NP_056988.3|
NM[16]M[16]AAC[418]DPR (+3)	2	1457.52	1008.2	NP_006078.2|,NP_115914.1|,NP_821133.1|,NP_817124.1|,NP_821080.1|,NP_006079.1|,NP_001060.1|,NP_006077.2|,NP_001184110.1|
GDYNKC[418]R (+3)	2	1272.5	854.931	NP_006810.1|
AANTQKC[418]IR (+2)	2	1421.65	1422.3	NP_001596.2|
ELC[418]ELKPK (+3)	2	1376.65	959.161	NP_036256.2|,NP_001137545.1|
TFC[418]PAHK (+3)	2	1220.51	802.941	NP_004095.4|
GIFPVLC[418]K (+3)	2	1293.62	876.117	NP_002645.3|,NP_872270.1|,NP_872271.1|,NP_001193725.1|,NP_001193726.1|,NP_001193727.1|,NP_001193728.1|
GKVC[418]FEM[16]K (+2)	2	1374.58	941.169	NP_004492.2|,NP_114032.2|
GKDC[418]AVIVTQK (+3)	2	1578.75	1579.5	NP_002782.1|
HC[418]NM[16]VLENVK (+3)	2	1619.69	1620.53	NP_004588.1|,NP_808210.2|
VC[418]EEIAIIPSKK (+3)	2	1746.87	1747.74	NP_001012.1|,NP_001185986.1|
SLETC[418]M[16]YDHK (+2)	2	1659.64	1226.38	NP_001367.2|
M[16]TDKC[418]FR (+3)	2	1333.53	900.077	NP_036590.1|
NC[418]SSFLIK (+2)	2	1328.59	1329.21	NP_000982.2|,NP_001129607.1|,NP_001129608.1|,NP_001129609.1|,NP_001129606.1|
LGQAC[418]PR (+2)	2	1161.51	743.875	NP_055718.4|
SC[418]HTGLGR (+2)	2	1247.52	829.925	NP_001054.1|
YIQAAC[418]K (+3)	2	1213.53	795.946	NP_004850.1|,NP_001826.3|,NP_009029.3|
AAC[418]DLVR (+2)	2	1164.51	1165.01	NP_001307.2|,NP_001243064.1|
TIAPC[418]QK (+2)	2	1177.53	759.914	NP_004125.3|
IKC[418]DKEK (+3)	2	1280.59	863.034	NP_003290.1|
PIIFDC[418]R (+2)	2	1280.57	1281.17	NP_002625.1|
EALNSC[418]NK (+2)	2	1295.53	877.963	NP_005372.2|
GNHEC[418]ASINR (+2)	2	1517.61	1100.17	NP_001231903.1|,NP_002700.1|,NP_002699.1|,NP_996756.1|,NP_996759.1|,NP_002701.1|,NP_001008709.1|
HEEFEEGC[418]K (+3)	2	1524.56	1107.15	NP_057164.3|
TPC[418]PNSK (+2)	2	1163.47	745.845	NP_003963.1|
VAVKC[418]IK (+3)	2	1177.6	760	NP_004374.1|,NP_001120662.1|
EFHGLGDC[418]IIK (+3)	2	1648.74	1231.42	NP_001142.2|
IGLDFC[418]K (+2)	2	1212.53	1213.09	NP_001180345.1|,NP_001180346.1|,NP_001347.3|,NP_004651.2|,NP_001116137.1|
LKESYC[418]QR (+2)	2	1443.63	1026.17	NP_003343.1|,NP_001005781.1|,NP_001005782.1|
EFHGLGDC[418]IIK (+2)	2	1648.74	1231.42	NP_001142.2|
VELPTC[418]M[16]YR (+2)	2	1544.65	1111.33	NP_006294.2|
PM[16]EVFM[16]C[418]SVLK (+2)	2	1732.73	1283.62	NP_001136120.1|,NP_064535.1|
SKPC[418]GSPR (+3)	2	1248.54	1249.08	NP_004136.2|,NP_001123537.1|
KVC[418]ASGK (+3)	2	1109.5	691.84	NP_002708.1|,NP_001171062.1|
KVC[418]ASGK (+2)	2	1109.5	691.84	NP_002708.1|,NP_001171062.1|
KGQEVC[418]VK (+3)	2	1307.6	890.059	NP_056988.3|
DVHNLC[418]PK (+3)	2	1342.58	925.064	NP_003175.1|
AVAAGNSC[418]R (+2)	2	1265.53	1266.07	NP_055874.2|,NP_006280.3|
LKPC[418]HLK (+3)	2	1255.62	838.072	NP_004614.3|
KC[418]LEELQK (+3)	2	1407.65	1408.31	NP_002785.1|,NP_001186708.1|,NP_001186709.1|
AAVAAGC[418]R (+2)	2	1135.49	1135.97	NP_056991.2|
NREC[418]LLSAPR (+2)	2	1575.73	1576.46	NP_060230.5|
NM[16]AC[418]VQR (+2)	2	1254.49	820.981	NP_003555.1|
FIVC[418]LNK (+2)	2	1253.59	836.053	NP_008835.5|,NP_001075109.1|
TC[418]PFLDK (+2)	2	1240.53	822.968	NP_783322.1|,NP_783324.1|,NP_071901.2|,NP_783323.1|,NP_001019818.1|
EVAALC[418]R (+2)	2	1178.52	1179.03	NP_001460.1|
M[16]QLVC[57]C[418]R (+2)	2	1342.53	852.101	NP_008835.5|,NP_001075109.1|
TKFEEC[418]R (+3)	2	1329.55	912.022	NP_002873.1|
IQQDSGC[418]K (+2)	2	1295.53	1296.09	NP_003676.2|
KAVVVC[418]PK (+3)	2	1260.64	843.089	NP_004492.2|,NP_114032.2|
GTAVAIC[418]R (+2)	2	1207.55	1208.07	NP_777614.1|,NP_777615.1|,NP_777613.1|,NP_777616.1|,NP_777618.1|,NP_005164.2|,NP_777617.1|,NP_733765.1|,NP_001672.1|
VQFC[418]PFEK (+3)	2	1414.6	997.168	NP_444278.1|
SEVC[418]FGK (+2)	2	1186.48	768.878	NP_055181.3|,NP_996561.1|,NP_996562.1|
KVPVAGC[418]R (+3)	2	1246.6	829.023	NP_002444.2|,NP_001005369.1|
LSESVLSPPC[418]FVR (+2)	2	1850.87	1433.67	NP_003461.2|
IKC[418]LATEK (+2)	2	1322.64	905.114	NP_001092006.1|,NP_003472.2|
AIC[418]LDHAK (+3)	2	1287.57	870.028	NP_001034679.2|,NP_001034680.2|
SC[418]GSLLPELK (+2)	2	1463.68	1464.37	NP_573566.2|
FC[418]PFYK (+2)	2	1221.5	1222.1	NP_001681.2|
RTIAPC[418]QK (+3)	2	1333.63	916.1	NP_004125.3|
IAGLC[418]NR (+2)	2	1163.52	745.891	NP_001153706.1|,NP_001243142.1|,NP_001153705.1|,NP_653300.2|,NP_000692.2|,NP_689509.1|,NP_001243143.1|,NP_000693.1|
VTDDLVC[418]LVYK (+3)	2	1684.78	1267.49	NP_003124.1|
ILSLC[418]PEIK (+2)	2	1432.71	1015.27	NP_009129.1|
KAC[418]TYIR (+2)	2	1271.58	854.029	NP_002942.2|
IEC[418]SHIR (+2)	2	1274.55	856.99	NP_057475.2|,NP_001243468.1|,NP_001243469.1|
GPLKC[418]VK (+2)	2	1161.57	743.958	NP_002726.1|,NP_001158230.1|,NP_001158231.1|,NP_001158232.1|,NP_001158233.1|,NP_001158234.1|,NP_002725.1|,NP_997636.1|,NP_997637.1|
TC[418]TFILR (+2)	2	1270.58	853.041	NP_006420.1|,NP_001009570.1|,NP_001159756.1|,NP_001159757.1|
GVAC[418]TQPR (+2)	2	1248.54	830.952	NP_001349.2|
KKVKIGTVEFPASC[418]TKVLKPMQPK (+3)	2	3074.65	2658.27	NP_065974.1|
VANYC[418]R (+2)	2	1142.46	724.829	NP_056473.2|
AC[418]QIFVR (+2)	2	1253.57	836.014	NP_005959.2|,NP_112480.2|
LHSVC[418]TLSK (+2)	2	1404.65	987.175	NP_000364.1|
TGC[418]IGAK (+2)	2	1066.46	1066.9	NP_000966.2|,NP_001186731.1|
AC[418]VVHGSDLK (+3)	2	1445.64	1446.31	NP_001153706.1|,NP_001153705.1|,NP_000692.2|,NP_000693.1|
LPC[418]AVLR (+2)	2	1188.58	1189.11	NP_057731.1|
EYKC[418]GDLVFAK (+2)	2	1689.75	1272.47	NP_004485.1|
GC[418]LDFLR (+2)	2	1240.54	822.972	NP_689508.3|,NP_001245366.1|,NP_001245367.1|
KEC[418]EVKK (+3)	2	1280.59	863.034	NP_055464.1|
VC[418]LDIIYK (+2)	2	1383.66	966.195	NP_008835.5|,NP_001075109.1|
YC[418]QEPR (+2)	2	1212.47	794.876	NP_573566.2|
SPFAVC[418]K (+2)	2	1168.5	1169.04	NP_071904.4|
SNYQGLPLPC[418]VK (+2)	2	1735.81	1318.54	NP_003128.3|
LPFSC[418]LR (+2)	2	1252.57	835.025	NP_036546.2|
ITNQVIYLNPPIEEC[418]R (+3)	2	2319.1	2320.31	NP_001367.2|
NFKC[418]HR (+3)	2	1221.52	803.932	NP_005144.2|
QYGFC[418]K (+2)	2	1162.46	744.858	NP_001613.2|
HC[418]DLQVR (+3)	2	1287.55	869.988	NP_003741.1|
VM[16]EEC[418]K (+2)	2	1171.43	737.886	NP_004729.1|
VKC[418]LGNPER (+3)	2	1432.66	1433.32	NP_001681.2|
FHPEC[418]PK (+2)	2	1274.52	856.988	NP_060898.2|
ELQAAC[418]R (+2)	2	1207.51	789.9	NP_036450.1|,NP_653253.1|,NP_001186588.1|,NP_001186589.1|
KAC[418]VLQR (+2)	2	1234.6	817.012	NP_065816.2|
SPYC[418]ITK (+2)	2	1228.53	810.958	NP_004042.1|,NP_976059.1|,NP_976060.1|
GRLC[418]FEGLR (+3)	2	1467.68	1468.37	NP_958781.1|,NP_958782.1|,NP_958783.1|,NP_958784.1|,NP_958785.1|,NP_958780.1|,NP_958786.1|,NP_000436.2|
GC[418]PFHR (+3)	2	1133.45	715.824	NP_005029.1|
LC[418]QFHR (+3)	2	1220.52	802.944	NP_004716.1|,NP_001007794.1|
GKPHC[418]SR (+3)	2	1201.51	783.899	NP_000961.2|,NP_001019833.1|
AVDALLTHC[418]K (+2)	2	1487.69	1488.39	NP_056474.2|
HPVSC[418]K (+3)	2	1087.46	669.793	NP_005318.3|,NP_001171634.2|
HPVSC[418]K (+2)	2	1087.46	1087.92	NP_005318.3|,NP_001171634.2|
VC[418]ADLIR (+2)	2	1206.55	1207.09	NP_001014.1|,NP_001139699.1|
FFSDC[418]K (+2)	2	1163.44	745.843	NP_005511.1|,NP_062543.1|,NP_001244222.1|,NP_001027565.1|
FHPEC[418]PK (+3)	2	1274.52	856.988	NP_060898.2|
LSQEC[418]PIK (+3)	2	1334.6	917.081	NP_001153239.1|,NP_054757.1|
IHDVLC[418]K (+2)	2	1244.57	1245.13	NP_573566.2|
LC[418]GEVKPK (+3)	2	1290.61	873.072	NP_001166935.1|,NP_001166936.1|,NP_001166934.1|,NP_060111.2|
M[16]C[418]VGNR (+2)	2	1112.42	678.825	NP_002203.1|,NP_001254739.1|,NP_852133.1|
TKFEEC[418]R (+2)	2	1329.55	912.022	NP_002873.1|
LGSISC[418]K (+2)	2	1124.5	1124.98	NP_003671.1|
NC[418]PISAK (+2)	2	1149.49	731.861	NP_036222.3|
AC[418]VHGR (+3)	2	1059.44	641.743	NP_057195.2|
LKEPC[418]LK (+3)	2	1247.6	830.047	NP_001177645.1|,NP_004936.2|,NP_001005360.1|
LC[418]HIAFHVPAGQPLAR (+4)	2	2147.06	2148.18	NP_116145.1|
VHLQC[418]R (+3)	2	1172.52	754.901	NP_001508.1|
FLDGNELTLADC[418]NLLPK (+3)	2	2293.08	1876.13	NP_001279.2|
AIC[418]DHVR (+2)	2	1230.53	812.937	NP_005908.1|,NP_001186040.1|,NP_001186041.1|
TC[418]GPEHSK (+3)	2	1275.5	857.931	NP_031372.2|
PGGARPC[418]SPGLER (+3)	2	1713.77	1296.46	NP_002211.1|
KGDEC[418]ELLGHSK (+4)	2	1732.75	1315.45	NP_003312.3|
IVDC[418]LLPSR (+2)	2	1432.68	1015.23	XXX_NP_612420.1|
LRGC[418]GPR (+3)	2	1175.53	757.905	NP_002186.1|,NP_079106.3|
SC[418]NC[57]LLLK (+2)	2	1367.6	1368.28	NP_001419.1|,NP_001188412.1|
SC[418]VIVLR (+2)	2	1206.59	1207.13	NP_060857.2|,NP_001164608.1|
ASLC[418]ISTK (+2)	2	1239.56	821.982	NP_001609.2|
DKMC[418]SM[16]VK (+2)	2	1374.54	941.191	NP_000997.1|
GC[418]AQALR (+2)	2	1135.49	717.838	NP_001155238.1|,NP_000678.1|
AHGDTQHC[418]R (+3)	2	1441.56	1024.07	NP_055521.1|
YVIC[418]VR (+2)	2	1169.54	751.937	NP_056084.1|,NP_001447.2|,NP_001104026.1|,NP_001009881.1|
VAVKC[418]IK (+2)	2	1177.6	760	NP_004374.1|,NP_001120662.1|
DINRYC[418]K (+3)	2	1328.56	911.037	NP_060707.2|
LSEC[418]LKR (+3)	2	1265.59	848.023	NP_620119.2|,NP_620116.1|,NP_004315.1|
AESQLLEC[418]K (+2)	2	1437.63	1020.16	NP_003283.2|
DKM[16]C[418]SM[16]VK (+2)	2	1390.54	941.191	NP_000997.1|
GDYNKC[418]R (+2)	2	1272.5	854.931	NP_006810.1|
YEDIC[418]PSTHNM[16]DVPNIK (+3)	2	2409.01	1976.19	NP_001093162.1|,NP_001137232.1|,NP_001961.1|,NP_001137233.1|,NP_001137234.1|,NP_065123.1|
EEPC[418]LLK (+2)	2	1248.55	830.989	NP_001449.3|,NP_001120959.1|,NP_001447.2|,NP_001104026.1|
YLAEC[418]R (+2)	2	1171.48	753.867	NP_060590.1|
QC[418]VPFR (+2)	2	1166.5	748.893	NP_000976.1|,NP_001030178.1|,NP_001186269.1|,NP_001186270.1|,NP_001186271.1|,NP_001186272.1|,NP_001186274.1|,NP_001186284.1|,NP_001186285.1|,NP_001186273.1|
PHC[418]SLR (+3)	2	1129.48	711.833	NP_001136094.1|,NP_115873.1|,NP_001136095.1|
EPC[418]PWR (+2)	2	1204.48	786.898	NP_006326.1|,NP_005825.1|,NP_001161419.1|
FETFC[418]LDPSLVTK (+2)	2	1916.87	1499.73	NP_055045.2|,NP_001247431.1|,NP_001247432.1|
SILC[57]C[418]LR (+2)	2	1281.57	807.037	NP_006592.3|
TC[57]NTNPHLNALSTDSAC[418]R (+3)	2	2392	2393.23	NP_055427.2|
LISETTSVC[418]KPEQVAK (+3)	2	2150.04	2151.12	NP_002026.1|
QM[16]EKDETVSDC[418]SPHIANIGR (+4)	2	2663.14	2664.56	NP_004921.1|,NP_001193469.1|
TAAPTVC[418]LLVLSQAEK (+3)	2	2061.03	2062.07	NP_060663.2|,NP_001106849.1|
KM[16]EDSVGC[418]LETAEEVKR (+4)	2	2357.03	2358.28	NP_002464.1|
NC[418]ISTVVHQGLIR (+3)	2	1856.9	1857.81	NP_008835.5|,NP_001075109.1|
M[16]EEFKDQLPADEC[418]NKLK (+4)	2	2471.08	2472.43	NP_004125.3|
ALQSLAC[418]GKPTQR (+3)	2	1789.86	1790.72	NP_003581.1|,NP_001244126.1|,NP_001244127.1|
LLLGNKC[418]DM[16]EAK (+3)	2	1767.8	1768.73	NP_002861.1|
GTLTLC[418]PYHSDR (+3)	2	1779.77	1780.64	NP_002799.3|
IPGGIIEDSC[418]VLR (+2)	2	1788.85	1789.73	NP_005989.3|,NP_001008800.1|
FIC[418]TTSAIQNR (+2)	2	1670.75	1671.56	NP_942127.1|,NP_001087.2|
YLDLHDC[418]YLK (+3)	2	1699.74	1700.6	NP_006793.1|
FC[418]AGNPGNQALLHK (+3)	2	1886.86	1887.8	NP_002215.2|
ALAGC[418]DFLTISPK (+2)	2	1752.82	1753.7	NP_006746.1|
LC[57]QSLGELC[418]PHLK (+3)	2	1914.88	1915.88	NP_061184.1|
SIKDTIC[418]NQDER (+3)	2	1838.79	1839.66	NP_055140.1|
KC[418]YEMASHLR (+3)	2	1654.71	1655.58	NP_005013.1|
ALANSLAC[418]QGK (+2)	2	1492.68	1493.37	NP_001230106.1|,NP_000025.1|,NP_908930.1|,NP_908932.1|,NP_001121089.1|
VRNC[418]SSPEFSK (+3)	2	1670.72	1671.52	NP_690902.1|,NP_690903.1|,NP_690904.1|,NP_690905.1|,NP_001185792.1|,NP_003906.2|
KEC[418]PFVIKPK (+3)	2	1605.8	1606.61	NP_113584.3|
KPASQC[418]VLDGVR (+3)	2	1689.8	1690.61	NP_001269.3|
AGVTC[418]IVLPAENKK (+3)	2	1859.93	1860.85	NP_004784.2|
ITQSLC[418]FIHR (+3)	2	1634.77	1635.57	NP_443091.1|
KIC[418]SHSAPEQQAR (+3)	2	1871.84	1872.74	NP_006744.2|
LGYTPVC[418]R (+2)	2	1325.59	1326.21	NP_002564.1|,NP_001139411.1|,NP_001139412.1|
ATILDLSC[418]NK (+2)	2	1494.68	1495.38	NP_060979.2|
KLYC[418]QELK (+3)	2	1441.67	1442.37	NP_055181.3|,NP_996561.1|,NP_996562.1|
ADPEC[418]M[16]LGHLLR (+3)	2	1787.78	1788.72	NP_055518.1|,NP_001165375.1|
GLLDVTC[418]K (+2)	2	1265.58	1266.15	NP_733779.1|,NP_008861.2|
IC[418]SKPVVLPK (+2)	2	1500.78	1501.52	NP_008835.5|,NP_001075109.1|
C[57]C[418]SGAIIVLTK (+2)	2	1581.74	1582.54	NP_002645.3|,NP_001193726.1|,NP_001193727.1|
IM[16]PEDIIINC[418]SK (+3)	2	1808.81	1375.65	NP_003277.1|
TSESLC[418]QNNM[16]VILK (+3)	2	2012.9	2013.96	NP_003391.1|
RFC[418]PSIQGAK (+3)	2	1523.7	1524.43	NP_115521.3|
GELLLQLC[418]R (+2)	2	1461.71	1462.4	NP_476516.1|
RC[418]QLTPNDR (+3)	2	1519.67	1520.36	NP_110395.1|
KIVEAC[418]K (+2)	2	1207.57	1208.11	NP_071933.2|
RC[418]DAGGPR (+3)	2	1248.51	1249.04	NP_060206.2|
QAC[418]VLM[16]IK (+2)	2	1338.61	905.18	NP_002464.1|
LKSC[418]LTAIHC[57]FHEAR (+3)	2	2203.01	1729.04	NP_005471.3|
EFM[16]LC[418]R (+2)	2	1231.48	797.985	NP_055037.1|
KC[418]LEELQK (+2)	2	1407.65	1408.31	NP_002785.1|,NP_001186708.1|,NP_001186709.1|
RC[418]QYVTEK (+2)	2	1443.63	1444.3	NP_001230106.1|,NP_000025.1|,NP_908930.1|,NP_908932.1|,NP_001121089.1|,NP_005156.1|
GLC[418]EKPLASAAAK (+3)	2	1675.81	1676.62	NP_036602.1|
TC[418]LGPK (+2)	2	1035.45	1035.89	NP_005989.3|
LAPHC[418]SFAR (+3)	2	1418.62	1419.29	NP_060284.1|,NP_001243695.1|
SC[418]GLHVTSIK (+3)	2	1461.67	1462.36	NP_001896.2|
SKKC[418]PFIVALNK (+3)	2	1764.91	1765.8	NP_056988.3|
HQAC[418]LLLQK (+3)	2	1470.71	1471.41	NP_055335.2|,NP_001099008.1|
KC[418]DLISIPK (+3)	2	1433.7	1434.39	NP_055140.1|
IC[418]IVTK (+2)	2	1093.53	1094.01	NP_002784.1|
SC[418]LPQIK (+2)	2	1205.56	1206.1	NP_003900.1|
TPC[418]EEILVK (+2)	2	1448.67	1449.35	NP_001447.2|,NP_001104026.1|
TGC[418]NVLLIQK (+2)	2	1505.74	1506.45	NP_006421.2|,NP_001243650.1|
DIHFM[16]PC[418]SGLTGANLK (+3)	2	2136.94	2138.11	NP_002085.2|,NP_001123478.1|,NP_001123479.1|
RC[418]ILPFDK (+2)	2	1408.66	1409.34	NP_112487.1|,NP_001254792.1|,NP_001254793.1|
IC[418]DDELILIK (+2)	2	1591.76	1592.54	NP_001008897.1|,NP_110379.2|
LC[418]IDIIK (+2)	2	1234.61	1235.18	DECOY_0_NP_004236.1|
QAHLC[418]VLASNC[57]DEPM[16]YVK (+3)	1	2511.07	2021.34	NP_001007.2|
LC[418]YVALDFEQEM[16]ATAASSSSLEK (+3)	1	2926.27	2927.89	NP_001605.1|,NP_001092.1|,NP_001186883.1|,NP_001077007.1|
TNHIGHTGYLNTVTVSPDGSLC[418]ASGGK (+4)	1	3103.41	3105.04	NP_006089.1|
GPSLQGDLAVSGDIKC[418]PK (+3)	1	2202.04	1785.03	NP_001611.1|
TTM[16]RPQSFYDGSHSC[418]AR (+4)	1	2376.97	2378.24	NP_002442.2|
KC[418]LELFTELAEDKENYKK (+5)	1	2618.24	2201.5	NP_001017963.2|,NP_005339.3|
YGDGGSTFQSTTGHC[418]VHM[16]R (+4)	1	2473.98	2041.18	NP_005511.1|,NP_001244222.1|
NPPELIGVHC[418]THGFNR (+4)	1	2208	2209.13	NP_003791.3|
LQETLSAADRC[418]GAALAGHQLIR (+3)	1	2711.33	2712.72	NP_008835.5|,NP_001075109.1|
NPPELIGVHC[418]THGFNR (+3)	1	2208	2209.13	NP_003791.3|
TTGLVGLAVC[418]NTPHER (+3)	1	2084.98	2086.02	NP_004991.1|
AYHEQLTVAEITNAC[418]FEPANQM[16]VK (+4)	1	3140.4	3142.16	NP_116093.1|
TC[418]GFDFTGAVEDISK (+2)	1	2006.84	2007.85	NP_002071.2|
GQVC[418]LPVISAENWKPATK (+4)	1	2358.15	1941.25	NP_001243284.1|,NP_001243285.1|,NP_003338.1|
EM[16]LPHVGVSDFC[418]ETKK (+4)	1	2252.99	1820.09	NP_000929.1|
VLTGVAGEDAEC[418]HAAK (+3)	1	1987.88	1988.85	NP_006382.1|
HGEVC[418]PAGWKPGSDTIKPDVQK (+4)	1	2766.29	2349.62	NP_859048.1|,NP_859047.1|,NP_002565.1|,NP_001189360.1|
VGM[16]GSGSIC[418]ITQEVLAC[57]GRPQATAVYK (+3)	1	3229.5	3231.33	NP_000875.2|
GEETPVIVGSALC[418]ALEGRDPELGLK (+4)	1	2970.45	2972.01	NP_003312.3|
SLDLFNC[418]EVTNLNDYR (+2)	1	2333.01	2334.2	NP_006296.1|,NP_006392.1|
GAVVGIDLGTTNSC[418]VAVM[16]EGK (+3)	1	2454.12	2455.44	NP_004125.3|
M[16]EDSVGC[418]LETAEEVK (+2)	1	2072.84	2073.93	NP_002464.1|
IGDLAC[418]ANIQHLSSR (+3)	1	2014.94	2015.93	NP_068598.1|
KC[418]LELFSELAEDKENYK (+4)	1	2476.13	2477.43	NP_031381.2|
EKGNEILELKC[418]NLENK (+3)	1	2291.09	1874.12	NP_003283.2|
C[57]PEALFQPC[418]FLGMESCGIHETTFNSIM[16]K (+3)	1	3623.54	3134.65	NP_001077007.1|,NP_001093241.1|,XP_003846703.1|,XP_933678.1|,XP_934799.2|
WANYHLENAGC[418]NK (+3)	1	1936.8	1937.77	NP_002289.2|
LIAGC[418]IGKPLGEQFR (+3)	1	2019.01	1601.91	NP_065801.1|
YATTGKC[418]ELENC[57]QPFVVETLHGK (+4)	1	3041.37	3043.04	NP_002694.3|
APSVANVGSHC[418]DLSLK (+2)	1	2014.92	2015.92	NP_001447.2|,NP_001104026.1|
LALC[418]SADSVAFPVLTHSTR (+3)	1	2405.15	2406.4	NP_056450.2|
KQELEEIC[418]HDLEAR (+4)	1	2129.95	1712.88	NP_002464.1|
VVVFIKPTC[57]PYC[418]R (+3)	1	1998.95	1524.89	NP_001230587.1|,NP_001230588.1|,NP_002055.1|,NP_001112362.1|
ESSEYLKC[418]LTQQAVALQR (+3)	1	2484.18	2485.45	NP_056044.3|
IAVYSC[418]PFDGM[16]ITETK (+3)	1	2207.96	2209.18	NP_006576.2|
ISEAC[418]SLAQQSGDHR (+3)	1	2018.86	1601.7	NP_624358.2|,NP_057404.2|
AC[418]ANPAAGSVILLENLR (+2)	1	2129.04	1711.98	NP_000282.1|
EM[16]FPYEASTPTGISASC[418]R (+2)	1	2379.98	2381.28	NP_001027454.1|,NP_001027455.1|
HVNTNPLC[418]DLTPIFK (+3)	1	2129.01	1711.98	NP_009103.2|,NP_705931.1|
PM[16]C[418]VESFSDYPPLGR (+3)	1	2130.88	2132.05	NP_001393.1|
GTDIM[16]YTGTLDC[418]WR (+2)	1	2064.84	1631.83	NP_001143.2|
NALANQSDC[418]VLHR (+2)	1	1857.83	1858.72	NP_057322.2|,NP_001131136.1|
VLTGVAGEDAEC[418]HAAK (+2)	1	1987.88	1988.85	NP_006382.1|
GISSQPFPELHC[418]AALK (+3)	1	2114.99	1697.95	NP_005038.1|,NP_001257356.1|
TATFENIVC[418]VLNR (+2)	1	1896.89	1897.83	NP_066961.2|
LRC[418]VLLSNLSSTSHVPEVDPGSAELQK (+4)	1	3296.62	3298.37	NP_004095.4|
IAVYSC[418]PFDGM[16]ITETK (+2)	1	2207.96	2209.18	NP_006576.2|
YASIC[418]QQNGIVPIVEPEILPDGDHDLK (+3)	1	3380.61	2964.31	NP_001230106.1|,NP_000025.1|,NP_908930.1|,NP_908932.1|,NP_001121089.1|,NP_005156.1|
YHNVGLSKC[418]EIK (+3)	1	1807.84	1390.61	NP_001003810.1|,NP_002129.2|,NP_112738.1|,NP_112737.1|
DGNASGTTLLEALDC[418]ILPPTRPTDKPLR (+5)	1	3381.67	2965.34	NP_001393.1|
LQAQVEC[418]SHSSQQR (+3)	1	2017.87	2018.84	NP_005886.2|,NP_001166028.1|
QITSYGETC[418]PGLEQYAIK (+3)	1	2418.09	2419.35	NP_006576.2|
NFILDQC[418]NVYNSGQR (+3)	1	2187.95	2189.05	NP_001073027.1|
NALANQSDC[418]VLHR (+3)	1	1857.83	1858.72	NP_057322.2|,NP_001131136.1|
FTFIEKC[418]NNPR (+3)	1	1785.8	1786.69	NP_001009186.1|,NP_001753.1|
AGAFDAVPC[418]YHWSVGGK (+3)	1	2181.94	1764.96	NP_056255.2|,NP_001229696.1|,NP_001229697.1|
M[16]GITEYNNQC[418]R (+2)	1	1761.69	1762.6	NP_002152.2|,NP_038203.2|
KDC[418]EVVMM[16]IGLPGAGK (+3)	1	2080.95	2082.15	NP_004492.2|,NP_114032.2|
VNPC[418]IGGVILFHETLYQK (+3)	1	2448.2	2449.51	NP_001230106.1|,NP_000025.1|,NP_908930.1|,NP_908932.1|,NP_001121089.1|
ADVIQATGDAIC[418]IFR (+3)	1	2009.93	1592.81	NP_003137.1|
KDC[418]EVVM[16]M[16]IGLPGAGK (+3)	1	2096.94	2098.14	NP_004492.2|,NP_114032.2|
THEAEIVEGENHTYC[418]IR (+4)	1	2418.04	2001.14	NP_001447.2|,NP_001104026.1|
SLENETLNKEEDC[418]HSPTSKPPKPDQPLK (+5)	1	3578.67	3162.44	NP_001408.2|
GAPEGVIDRC[418]THIR (+4)	1	1940.9	1523.72	NP_733765.1|,NP_001672.1|
SLENETLNKEEDC[418]HSPTSKPPKPDQPLK (+4)	1	3578.67	3162.44	NP_001408.2|
VIGSGC[418]NLDSAR (+2)	1	1608.7	1609.45	NP_005557.1|,NP_001128711.1|,NP_002292.1|,NP_059144.1|,NP_001158886.1|,NP_001158887.1|,NP_001158888.1|,NP_659409.2|,NP_001137543.1|,NP_002291.1|,NP_001167568.1|
SSFESSC[418]PQQWIK (+2)	1	1943.82	1944.8	NP_001013003.1|,NP_001193570.1|
ALSVGNIDDALQC[418]YSEAIK (+3)	1	2427.11	2428.36	NP_006810.1|
TTQFSC[418]TLGEK (+2)	1	1631.7	1632.48	NP_001435.1|
KPASQC[418]VLDGVR (+2)	1	1689.8	1272.47	NP_001269.3|
VQEKC[418]QLEINFNTLQTK (+2)	1	2453.17	2454.44	NP_004915.2|,NP_001093.1|,NP_001123476.1|,NP_001123477.1|,NP_001094.1|
LPLVTPHTQC[418]R (+3)	1	1681.81	1682.63	NP_002793.2|
KSDSNPLTEILKC[418]PTK (+3)	1	2191.07	1774.04	NP_116294.1|,NP_001139019.1|
HRPQVAIIC[418]GSGLGGLTDK (+3)	1	2339.15	1922.21	NP_000261.2|
WC[418]EYGLTFTEK (+2)	1	1793.74	1376.53	NP_003366.2|,NP_001171712.1|,NP_001171752.1|
VNQIGSVTESIQAC[418]K (+3)	1	1993.92	1576.77	NP_001967.3|,NP_443739.3|,NP_001180432.1|
GEVPC[418]TVTSASPLEEATLSELK (+3)	1	2678.25	2261.5	NP_001688.1|
YWLC[418]AATGPSIK (+2)	1	1726.78	1727.66	NP_006089.1|
AGESVLVHGASGGVGLAAC[418]QIAR (+3)	1	2540.23	2541.52	NP_001880.2|,NP_001123514.1|,NP_001123515.1|
YLANKC[418]SIASR (+3)	1	1642.76	1643.55	NP_006383.2|
ENVIM[16]SQILPC[418]IK (+2)	1	1920.91	1921.95	NP_055040.2|
KVDLSQPLIATC[418]R (+4)	1	1860.92	1443.71	NP_003303.2|,NP_001257412.1|
LNIISNLDC[418]VNEVIGIR (+3)	1	2302.14	2303.32	NP_055040.2|
SVC[418]TEAGM[16]FAIR (+2)	1	1717.73	1718.63	NP_002794.1|
YASIC[418]QQNGIVPIVEPEILPDGDHDLK (+4)	1	3380.61	3382.44	NP_001230106.1|,NP_000025.1|,NP_908930.1|,NP_908932.1|,NP_001121089.1|,NP_005156.1|
KM[16]EDSVGC[418]LETAEEVKR (+3)	1	2357.03	2358.28	NP_002464.1|
YC[418]YYNETHK (+2)	1	1637.63	1638.44	NP_078938.2|,NP_001137502.1|
IVAAHNKC[418]PR (+4)	1	1525.73	1108.32	NP_057149.1|
IVAAHNKC[418]PR (+3)	1	1525.73	1526.45	NP_057149.1|
IGDLAC[418]ANIQHLSSR (+2)	1	2014.94	2015.93	NP_068598.1|
NQLTSLPSAIC[418]K (+2)	1	1691.8	1692.62	NP_002009.1|,NP_001243193.1|,NP_001243194.1|
LPC[418]IFIC[57]ENNR (+2)	1	1795.78	1796.72	NP_001166925.1|,NP_001166926.1|,NP_000275.1|,NP_001166927.1|
M[16]ININILSVC[418]K (+2)	1	1680.8	1681.7	NP_057226.1|
SSVTHLLC[418]ASK (+3)	1	1562.72	1145.33	NP_061849.2|
GLELIASENFC[418]SR (+3)	1	1855.82	1438.61	NP_005403.2|,NP_001159828.1|,NP_001159829.1|,NP_001159830.1|,NP_001159831.1|
VALNVSC[418]ANLLDK (+2)	1	1776.85	1777.72	NP_003900.1|
FLQLLC[418]ENHNR (+3)	1	1803.82	1386.58	NP_002215.2|
TM[16]VQLGIC[418]AFR (+2)	1	1671.76	1672.65	NP_001093131.1|,NP_003743.1|,NP_001032897.1|,NP_001186071.1|,NP_001254503.1|
NAGNC[418]LSPAVIVGLLK (+2)	1	1986.01	1568.88	NP_006614.2|
IC[418]SWNVDGLR (+2)	1	1579.69	1162.32	NP_001632.2|,NP_542379.1|,NP_542380.1|,NP_001231178.1|
IINDNATYC[418]R (+3)	1	1599.68	1600.44	NP_006383.2|
SC[418]ATFSSSHR (+2)	1	1499.59	1082.15	NP_001070674.1|,NP_001070676.1|,NP_001070675.1|,NP_055748.2|,NP_057295.2|,NP_001177978.1|
FLLQEEISKC[418]K (+2)	1	1754.84	1337.58	NP_001219.2|,NP_203519.1|,NP_203520.1|,NP_203522.1|,NP_001073593.1|,NP_001073594.1|
YHQIGSGKC[418]EIK (+3)	1	1779.81	1362.55	NP_001193929.1|,NP_112740.1|
TNPTEPVGVVC[418]R (+2)	1	1688.77	1271.44	NP_003106.3|
LLDLVQQSC[418]NYK (+2)	1	1840.85	1841.76	NP_001003796.1|,NP_004999.1|
HLNEIDLFHC[418]IDPNDSK (+4)	1	2427.06	2010.19	NP_006592.3|
KGDSNANSDVC[418]AAALR (+3)	1	2008.87	2009.83	NP_055204.2|
AVIFC[418]LSADKK (+3)	1	1611.78	1194.44	NP_006861.1|,NP_001011546.1|
GADIM[16]YTGTVDC[418]WR (+2)	1	2020.81	1587.77	NP_001142.2|,NP_001627.2|
ALAGC[418]DFLTISPK (+3)	1	1752.82	1335.57	NP_006746.1|
IFVGGIPHNC[418]GETELR (+3)	1	2158.99	1741.96	NP_061832.2|,NP_733829.1|
DGLGFC[418]ALIHR (+3)	1	1618.74	1619.53	NP_001093.1|,NP_001123476.1|,NP_001123477.1|
FGEVVDC[418]TIK (+3)	1	1527.67	1110.28	NP_112556.2|,NP_004490.2|,NP_001193929.1|,NP_112740.1|
EKGNEILELKC[418]NLENK (+4)	1	2291.09	1874.12	NP_003283.2|
NTWDC[418]GLQILK (+2)	1	1707.77	1290.49	NP_005975.1|,NP_001243463.1|
KLC[418]PQSLFSK (+3)	1	1567.75	1150.39	NP_055426.1|
QKC[418]LAALASLR (+2)	1	1590.8	1591.56	NP_036350.2|,NP_004507.2|,NP_703194.1|,NP_060090.2|,NP_001131145.1|
VTAVIPC[418]FPYAR (+3)	1	1753.83	1336.6	NP_787082.1|,NP_002755.1|
ELEVLLM[16]C[418]NK (+2)	1	1624.73	1191.46	NP_000985.1|,NP_001007074.1|,NP_001007075.1|
YC[418]DPDSYHR (+3)	1	1572.58	1155.2	NP_009210.1|,NP_001012496.1|
DPYGNRPLC[418]IGR (+3)	1	1777.8	1360.54	NP_002694.3|
GTDIM[16]YTGTLDC[418]WR (+3)	1	2064.84	1631.83	NP_001143.2|
KEC[418]PFVIKPK (+4)	1	1605.8	1188.48	NP_113584.3|
LHSLQPHAC[418]FR (+3)	1	1725.79	1308.51	NP_001367.2|
SC[418]ENLAPFNTALK (+2)	1	1824.82	1825.72	NP_006294.2|
EGVVEC[418]SFVK (+2)	1	1513.66	1514.39	NP_005909.2|
SAGAC[418]TAAAFLK (+3)	1	1527.69	1528.42	NP_056991.2|
SLHDALC[418]VIR (+3)	1	1543.73	1126.33	NP_036205.1|
YKDGVVTIGC[418]VGFPNVGK (+3)	1	2270.09	1853.15	NP_005266.2|
FVTSC[418]SRPPLLGFK (+3)	1	1968.96	1551.85	NP_055486.2|
IGLIQFC[418]LSAPK (+2)	1	1706.85	1289.59	NP_006421.2|,NP_001243650.1|
LLIDEAILKC[418]DAER (+3)	1	2018.98	1601.86	NP_006504.2|
HM[16]AAASAEC[418]QNYAK (+3)	1	1927.77	1928.78	NP_004578.2|,NP_001036041.1|
TATAVAHC[418]K (+2)	1	1318.58	1319.17	NP_001011.1|
SFGSKC[418]QLSEK (+3)	1	1630.71	1213.36	NP_001059.2|
AC[418]ILC[57]VHPR (+2)	1	1485.67	1011.27	NP_055791.1|
ETVSEESNVLC[418]LSK (+3)	1	1954.87	1537.69	NP_001952.1|
VIRC[418]M[16]TNTPVVVR (+3)	1	1920.94	1921.96	NP_722546.1|,NP_008838.2|
AKVDEFPLC[418]GHM[16]VSDEYEQLSSEALEAAR (+4)	1	3657.61	3225.52	NP_006004.2|,NP_001243506.1|
VKC[418]SGPGLSPGM[16]VR (+3)	1	1820.84	1821.8	NP_001447.2|,NP_001104026.1|
TTQFSC[418]TLGEK (+3)	1	1631.7	1214.35	NP_001435.1|
VGEVC[57]HITC[418]KPEYAYGSAGSPPK (+3)	1	2867.27	2393.69	NP_002005.1|
FSVPHVC[418]AR (+3)	1	1432.64	1433.32	NP_055681.1|
ITGC[418]ASPGK (+2)	1	1250.54	1251.1	NP_006421.2|,NP_001243650.1|
NILEESLC[418]ELVAK (+3)	1	1877.89	1878.82	NP_008835.5|,NP_001075109.1|
TVYC[418]NVHK (+2)	1	1380.6	963.112	NP_005753.1|
VIC[418]ILSHPIK (+2)	1	1539.79	1540.55	NP_001485.2|,NP_001108628.1|
LAAVVSAC[418]K (+2)	1	1278.61	1279.19	NP_008835.5|,NP_001075109.1|
GFC[418]FLEYEDHK (+3)	1	1804.72	1387.52	NP_006363.4|,NP_001153148.1|,NP_001153147.1|,NP_001153145.1|,NP_001153146.1|,NP_001153149.1|,NP_001240700.1|,NP_005817.1|,NP_001095867.1|,NP_001095868.1|,NP_001095869.1|
C[57]FSVLGFC[418]K (+2)	1	1477.62	1003.24	NP_066964.1|
SSEHINEGETAM[16]LVC[418]K (+3)	1	2180.92	1747.94	NP_940993.1|,NP_001719.2|,NP_940991.1|,NP_940992.1|
LPC[418]IFIC[57]ENNR (+3)	1	1795.78	1321.57	NP_001166925.1|,NP_001166926.1|,NP_000275.1|,NP_001166927.1|
INSITVDNC[418]K (+2)	1	1523.67	1524.38	NP_006358.1|,NP_001099000.1|
NC[418]PHIVVGTPGR (+2)	1	1666.77	1667.57	NP_004631.1|,NP_542165.1|
SITC[418]WTLSR (+2)	1	1483.66	1066.23	NP_002261.3|,NP_694858.1|
SIQFVDWC[418]PTGFK (+3)	1	1944.85	1527.74	NP_005991.1|,NP_006073.2|
SLENETLNKEEDC[418]HSPTSKPPKPDQPLK (+6)	1	3578.67	3162.44	NP_001408.2|
HC[418]SQVDSVR (+3)	1	1447.6	1448.25	NP_612632.1|,NP_001171669.1|,NP_005222.2|
IQEKC[418]QLEINFNTLQTK (+3)	1	2467.19	2050.34	NP_001095.1|,NP_001245300.1|
LGEWVGLC[418]K (+2)	1	1421.65	1422.33	NP_001007.2|
ELEVLLM[16]C[418]NK (+3)	1	1624.73	1191.46	NP_000985.1|,NP_001007074.1|,NP_001007075.1|
TIC[418]SHVQNM[16]IK (+2)	1	1706.76	1707.65	NP_000652.2|,NP_001020092.1|
SLLALKEC[418]IR (+3)	1	1562.79	1563.55	NP_001091981.1|,NP_004511.2|,NP_001230881.1|,NP_001230882.1|
HIGVC[418]ISVANNR (+2)	1	1699.79	1282.47	NP_006363.4|,NP_001153148.1|,NP_001153147.1|,NP_001153145.1|,NP_001153146.1|,NP_001153149.1|,NP_001240700.1|
SGC[418]IVNNLAEFTVDPK (+3)	1	2123.97	1706.91	NP_001448.2|,NP_001157789.1|,NP_001157790.1|,NP_001157791.1|
TIIFC[418]ETKK (+3)	1	1499.72	1082.31	NP_004719.2|,NP_001243839.1|
VPQC[418]PSGR (+2)	1	1260.54	842.963	NP_008933.2|,NP_783163.1|
YGYEIPVDM[16]LC[418]K (+3)	1	1863.79	1430.69	NP_002782.1|
SVLGGDC[418]LLK (+2)	1	1421.67	1004.2	NP_004374.1|,NP_001120662.1|
WDFTPC[418]K (+2)	1	1313.52	896.021	NP_001681.2|
KC[418]ILAGDHK (+3)	1	1401.65	984.174	NP_002171.2|
WLC[418]PLSGK (+2)	1	1320.6	903.099	NP_056992.4|,NP_001122324.1|,NP_001122325.1|,NP_001122326.1|
GKVC[418]FEM[16]K (+3)	1	1374.58	941.169	NP_004492.2|,NP_114032.2|
DKAPGQLEC[57]ETAIAALNSC[418]LR (+3)	1	2677.23	2203.5	NP_006280.3|
QM[16]YC[418]VFNR (+3)	1	1493.59	1060.25	NP_004701.1|
LTEGC[418]SFR (+2)	1	1329.55	1330.15	NP_001021.1|,NP_057004.1|
LLYEALVDC[418]K (+3)	1	1583.74	1166.39	NP_006351.2|
SPYTVTVGQAC[418]NPSAC[57]R (+3)	1	2227.94	1753.95	NP_001447.2|,NP_001104026.1|
LSQEC[418]PIKEVVLYVK (+3)	1	2165.09	1748.09	NP_001153239.1|,NP_054757.1|
PTC[57]PYC[418]R (+2)	1	1313.5	838.994	NP_001230587.1|,NP_001230588.1|,NP_002055.1|,NP_001112362.1|
DSLDQFDC[418]K (+2)	1	1487.57	1070.13	NP_065801.1|
LGVC[418]FDVPTASVTEIQEK (+3)	1	2353.1	1936.19	NP_004719.2|,NP_001243839.1|
VSADDRC[418]K (+3)	1	1310.54	892.977	NP_008938.2|
ATYDKLC[418]K (+2)	1	1358.6	1359.23	NP_001019.1|
KC[418]ILAGDHK (+4)	1	1401.65	984.174	NP_002171.2|
M[16]AC[418]GLGGK (+2)	1	1169.47	735.916	NP_002262.3|
GEHVPGFC[418]LPK (+3)	1	1600.72	1183.38	NP_006827.1|
LQIELGKC[418]K (+2)	1	1448.72	1449.4	NP_005564.1|
EYGFC[418]IM[16]DNHK (+3)	1	1789.69	1356.53	NP_003277.1|
GLSSLLC[418]NFTK (+3)	1	1599.74	1182.39	NP_008835.5|,NP_001075109.1|
HIAVFPC[418]K (+2)	1	1331.62	914.125	NP_056988.3|
LEDEHLVFFC[418]QM[16]GK (+2)	1	2128.91	1695.96	NP_001106676.1|,NP_001106677.1|,NP_001106678.1|
NLFNVVDC[418]K (+3)	1	1468.65	1051.22	NP_001032360.1|,NP_003742.2|
VELC[418]SFSGYK (+3)	1	1549.66	1132.29	NP_000977.1|
RVC[418]EEIAIIPSKK (+3)	1	1902.97	1903.92	NP_001012.1|,NP_001185986.1|
YHTVNGHNC[418]EVR (+3)	1	1845.77	1428.53	NP_112420.1|,NP_002127.1|
GDGPIC[418]LVLAPTR (+2)	1	1728.83	1311.55	NP_004387.1|,NP_006377.2|,NP_001091974.1|
ITVAWC[418]K (+2)	1	1237.56	1238.14	NP_003277.1|
LFLPC[418]PM[16]DVEGSR (+2)	1	1896.82	1463.72	NP_055718.4|
EGLLLWC[418]QR (+2)	1	1534.71	1117.32	NP_004915.2|,NP_001093.1|,NP_001123476.1|,NP_001123477.1|,NP_001095.1|,NP_001245300.1|,NP_001094.1|
NTNPNFVRC[418]IIPNHEK (+3)	1	2313.08	1896.13	NP_001242941.1|,NP_002464.1|,NP_005955.3|,NP_001243024.1|
AAQHGVC[418]SVLK (+2)	1	1529.71	1112.3	NP_055994.2|,NP_001138586.1|
IISDNLTYC[418]K (+2)	1	1586.71	1169.35	NP_057018.1|
AIPQVKC[418]NEQPNR (+2)	1	1913.89	1496.69	NP_055423.1|,NP_055191.2|,NP_001032410.1|,NP_001032409.2|
EAC[418]GVIVELIK (+2)	1	1590.78	1173.42	NP_003698.1|
ASLAC[418]GPM[16]VK (+2)	1	1409.61	976.215	NP_001367.2|
TFC[418]PAHK (+2)	1	1220.51	1221.07	NP_004095.4|
NC[418]IGDFLK (+2)	1	1326.57	909.061	NP_060918.2|
VQFC[418]PFEK (+2)	1	1414.6	997.168	NP_444278.1|
SIPIC[418]TLK (+2)	1	1291.63	874.1	NP_695012.1|,NP_003325.2|
YGQNC[418]HK (+2)	1	1266.49	848.926	NP_817092.1|
KENQWC[418]EEK (+2)	1	1610.65	1193.29	NP_733779.1|
GC[418]GTVLLSGPR (+3)	1	1476.69	1059.24	NP_000970.1|,NP_001257419.1|
FIDPFC[418]R (+2)	1	1314.55	897.052	NP_003674.1|
ALC[418]DPLEEVR (+2)	1	1561.69	1144.3	NP_006827.1|
NNLASC[418]YLK (+2)	1	1442.63	1025.18	NP_958929.1|,NP_958930.1|,NP_958931.1|,NP_005543.2|,NP_891553.2|,NP_001123579.1|
TDGC[418]HAYLSK (+2)	1	1511.62	1094.2	NP_006358.1|,NP_001099000.1|
LIIVEGC[418]QR (+2)	1	1447.7	1448.37	NP_001153706.1|,NP_001243142.1|,NP_001153705.1|,NP_653300.2|,NP_000692.2|,NP_689509.1|,NP_001243143.1|,NP_000693.1|
TYPGVM[16]HSSC[418]PQEM[16]AAVK (+2)	1	2384.99	1936.24	NP_009191.1|
AAEDKC[418]K (+2)	1	1181.48	763.86	NP_001138632.1|
ETIAKC[418]IADLK (+3)	1	1621.78	1204.44	NP_001679.2|
DANC[418]SVM[16]R (+2)	1	1328.49	895.016	NP_036602.1|,NP_001177957.2|
LVVVLC[418]NLKPQK (+2)	1	1770.95	1353.72	NP_003671.1|
LSC[418]FAQTVSPAEK (+2)	1	1797.81	1380.57	NP_003079.1|
YGQNC[418]HK (+3)	1	1266.49	848.926	NP_817092.1|
RFC[418]PFAER (+3)	1	1442.62	1025.18	NP_004823.1|,NP_001177931.1|,NP_001177932.1|
M[16]M[16]IPDC[418]QR (+3)	1	1442.55	993.225	NP_004598.1|
EKLC[418]FLDK (+3)	1	1412.65	995.193	NP_612510.1|
AGKPVIC[418]ATQM[16]LESM[16]IK (+2)	1	2269.06	1820.25	NP_002645.3|,NP_872270.1|,NP_872271.1|,NP_001193725.1|,NP_001193726.1|,NP_001193727.1|,NP_001193728.1|
IHDVLC[418]K (+3)	1	1244.57	827.003	NP_573566.2|
LNVC[418]VSK (+2)	1	1179.54	761.93	NP_001524.2|,NP_001005335.1|,NP_612403.2|,NP_001136122.1|
DISVQAIAC[418]R (+2)	1	1492.68	1075.24	NP_056315.1|,NP_950251.1|
TLHSC[418]SVR (+2)	1	1319.58	902.03	NP_057535.1|,NP_001137533.1|,NP_001137534.1|
KC[418]YLEQK (+2)	1	1328.59	911.077	NP_001139624.1|,NP_000777.1|
SC[418]GYSVR (+2)	1	1188.47	770.854	NP_001348.2|
ISSNC[418]PK (+2)	1	1165.49	747.861	NP_001243125.1|,NP_001645.1|
NTHC[418]SSLPHYQK (+4)	1	1831.78	1414.55	NP_001181885.1|,NP_954659.1|,NP_061322.2|,NP_001181883.1|,NP_001181884.1|
M[16]GVPYC[418]IIK (+3)	1	1456.66	1023.31	NP_000963.1|
TQEQC[418]VHNETK (+3)	1	1733.71	1316.4	NP_056375.2|,NP_570844.1|,NP_570845.1|,NP_570846.1|,NP_570847.2|,NP_570848.1|,NP_570849.2|,NP_570850.2|
QELGIC[418]PAVK (+3)	1	1474.69	1057.26	NP_004332.2|
ETGAASFLC[418]R (+3)	1	1471.62	1054.18	NP_003282.2|
VPDHHPC[418] (+3)	1	1221.47	803.886	NP_001185771.1|,NP_006422.1|
TTHYTPLAC[418]GSNPLK (+2)	1	2019.92	1602.81	NP_001354.1|,NP_001135935.1|
HVLTGSADNSC[418]R (+2)	1	1676.7	1259.35	NP_003748.1|
M[16]QLVC[418]C[57]R (+2)	1	1342.53	852.101	NP_008835.5|,NP_001075109.1|
QKVC[418]LDIIYK (+3)	1	1639.81	1222.5	NP_008835.5|,NP_001075109.1|
ATNVC[418]TR (+2)	1	1181.5	763.863	NP_003592.3|
LTEC[418]QLK (+2)	1	1251.56	833.993	NP_056655.2|,NP_056656.2|,NP_001102.2|,NP_001020278.1|,NP_001180424.1|
KC[418]STPEEIK (+3)	1	1451.64	1034.18	NP_006861.1|,NP_001011546.1|
TQADELPAC[418]LLSAAR (+3)	1	1975.91	1558.76	NP_001243125.1|,NP_001645.1|
NVHYC[418]TLR (+2)	1	1422.62	1005.15	NP_056271.2|
DLLVQQASQC[418]LSK (+3)	1	1849.87	1432.64	NP_001073027.1|
VVHC[418]QPLDLK (+3)	1	1568.75	1569.51	NP_112226.2|,NP_001120968.1|
KC[418]LSVM[16]EAK (+2)	1	1441.64	1008.26	NP_001596.2|
AFVKC[418]TK (+2)	1	1213.56	795.989	NP_060441.2|
WGTLTDC[418]VVM[16]R (+2)	1	1713.73	1280.52	NP_112420.1|,NP_002127.1|,NP_001011724.1|,NP_001011725.1|,NP_919223.1|
M[16]TC[418]HKR (+3)	1	1208.49	774.955	NP_055181.3|,NP_996561.1|,NP_996562.1|
IIDINYYPVPEAC[418]LSNK (+3)	1	2369.11	1952.23	NP_001024.1|
KC[418]DSWWAK (+2)	1	1440.6	1023.17	NP_008835.5|,NP_001075109.1|
TVYC[418]NVHK (+3)	1	1380.6	963.112	NP_005753.1|
ALAIM[16]C[418]R (+2)	1	1210.53	777.011	NP_510965.1|,NP_055096.2|,NP_001129505.1|
IVGPSGAAVPC[418]K (+3)	1	1515.72	1516.45	NP_001447.2|,NP_001104026.1|
AAC[418]YTK (+2)	1	1073.43	655.763	NP_006810.1|
HC[418]DNLLR (+2)	1	1287.55	869.988	NP_060708.1|
DPVQC[418]SR (+2)	1	1221.49	803.884	NP_009193.2|,NP_001116849.1|
DGLAFC[418]AILHR (+3)	1	1632.75	1215.42	NP_203744.1|
DKM[16]C[418]SM[16]VK (+3)	1	1390.54	941.191	NP_000997.1|
SC[418]KSDLK (+2)	1	1197.52	779.902	NP_036333.2|,NP_001139138.1|,NP_001139139.1|
C[57]C[418]SGAIIVLTK (+3)	1	1581.74	1107.39	NP_002645.3|,NP_001193726.1|,NP_001193727.1|
YGYEIPVDM[16]LC[418]K (+2)	1	1863.79	1430.69	NP_002782.1|
KC[418]LISEM[16]AK (+3)	1	1455.66	1022.28	NP_060621.3|
QYQAGQTVTC[418]FLK (+2)	1	1903.86	1486.69	NP_055791.1|
LLEC[418]HFM[16]PPEK (+2)	1	1776.77	1343.61	NP_115766.3|
NC[418]GSFTR (+2)	1	1201.46	783.853	NP_942127.1|,NP_001087.2|
RSEVPC[418]APM[16]PK (+3)	1	1647.72	1214.46	NP_055844.2|,NP_001139332.1|,NP_001139333.1|
RC[418]ILPFDK (+3)	1	1408.66	1409.34	NP_112487.1|,NP_001254792.1|,NP_001254793.1|
IQAESGC[418]K (+2)	1	1252.52	834.938	NP_003925.1|
M[16]C[418]HNVNR (+3)	1	1306.5	873.016	NP_003866.1|
VSEC[418]C[57]R (+2)	1	1170.43	695.809	NP_001026859.1|
IHEAC[418]M[16]LALGSVK (+3)	1	1804.83	1371.67	NP_060555.2|
VM[16]EEC[418]KR (+3)	1	1327.54	894.071	NP_004729.1|
NSHC[418]VR (+3)	1	1132.45	714.794	NP_001448.2|,NP_001157789.1|,NP_001157790.1|,NP_001157791.1|
PQTEC[418]R (+2)	1	1150.45	1150.94	NP_008835.5|,NP_001075109.1|
PGQC[418]GR (+2)	1	1034.41	616.691	NP_001003.1|
EAAREC[418]R (+3)	1	1251.51	833.913	NP_898829.1|,NP_898830.1|,NP_874386.1|,NP_874389.1|,NP_874390.1|,NP_874392.1|,NP_898831.1|,NP_005162.1|,NP_604391.1|,NP_004370.1|
RC[418]TKPDR (+4)	1	1292.58	875.008	NP_055117.1|,NP_001012474.1|
IAC[418]LDFSLQK (+2)	1	1554.72	1137.35	NP_001008897.1|,NP_110379.2|
VC[418]QGER (+2)	1	1108.44	690.769	NP_004125.3|
ATGHSGGGC[418]ISQGR (+2)	1	1704.71	1287.36	NP_078895.2|
HIQSC[418]K (+2)	1	1132.48	714.834	NP_004136.2|,NP_001123537.1|
IKC[418]DKEK (+2)	1	1280.59	1281.17	NP_003290.1|
QVC[418]WGAR (+2)	1	1236.52	818.943	NP_001013003.1|,NP_001193570.1|
ALC[418]YLVLK (+2)	1	1339.67	922.186	NP_006800.2|
ATQC[418]VPK (+2)	1	1163.51	745.888	NP_079472.1|
GQVC[418]LPVISAENWK (+2)	1	1960.92	1543.79	NP_001243284.1|,NP_001243285.1|,NP_003338.1|
GHNC[418]PK (+2)	1	1072.42	654.739	NP_004387.1|
ALVGLC[418]K (+2)	1	1120.54	702.906	NP_061141.2|,NP_001034764.1|
RC[418]ACSKGSLR (+2)	1	1497.66	1080.29	XXX_NP_008858.1|
EVLTEDKC[418]LQR (+2)	1	1750.8	1333.51	NP_695012.1|,NP_003325.2|
DVC[418]FHLLK (+3)	1	1391.64	974.177	NP_624358.2|,NP_057404.2|
KC[418]PFGALSIVNLPSNLEK (+3)	1	2347.17	1930.27	NP_002931.2|,NP_001035809.1|
TNKPC[418]GK (+2)	1	1164.51	746.876	NP_057651.1|,NP_510868.1|,NP_510869.1|
GHSC[418]YRPR (+3)	1	1392.58	975.086	NP_001001.2|
PLHFTYNSC[418]PEGAR (+2)	1	2008.86	1591.75	NP_055486.2|
HC[418]GALR (+2)	1	1073.45	655.77	NP_002939.2|,NP_001240308.1|,NP_001240309.1|,NP_001240311.1|,NP_001240312.1|,NP_001240313.1|
SILC[418]C[57]LR (+3)	1	1281.57	807.037	NP_006592.3|
M[16]C[418]LAHSAGVVPTSQSLADM[16]QDHAPAIGR (+4)	1	3312.48	2864.24	NP_001073867.1|
IIANALSSEPAC[418]LAEIEEDKAR (+3)	1	2760.31	2761.74	NP_008835.5|,NP_001075109.1|
SAGVQC[418]FGPTAEAAQLESSKR (+3)	1	2554.16	2555.46	NP_001129477.1|,NP_001129478.1|,NP_000810.1|,NP_780294.1|
VSGGLEVLAEKC[418]PNLTHLNLSGNK (+3)	1	2910.44	2911.96	NP_006296.1|
VHSPSGAVEEC[418]HVSELEPDK (+4)	1	2566.11	2149.29	NP_001448.2|,NP_001157789.1|,NP_001157790.1|,NP_001157791.1|
TTQFSC[418]TLGEKFEETTADGR (+3)	1	2638.13	2639.49	NP_001435.1|
SVANVIQQAGC[418]PVPEYIK (+2)	1	2333.12	2334.33	NP_008941.2|
VAC[418]ITEQVLTLVNK (+2)	1	1947.98	1948.96	NP_002941.1|
FIQENIFGIC[418]PHM[16]TEDNKDLIQGK (+4)	1	3223.48	2791.16	NP_005304.3|
M[16]EEFKDQLPADEC[418]NKLK (+3)	1	2471.08	2038.3	NP_004125.3|
YESHPVC[418]ADLQAK (+3)	1	1877.81	1878.74	NP_060282.1|
PVIC[418]ATQM[16]LESM[16]IK (+2)	1	2012.91	2014.06	NP_002645.3|,NP_872270.1|,NP_872271.1|,NP_001193725.1|,NP_001193726.1|,NP_001193727.1|,NP_001193728.1|
C[57]PEALFQPCFLGMESC[418]GIHETTFNSIM[16]K (+3)	1	3623.54	3134.65	NP_001077007.1|,NP_001093241.1|,XP_003846703.1|,XP_933678.1|,XP_934799.2|
LVVPATQC[418]GSLIGK (+3)	1	1802.91	1385.67	NP_006187.2|
VHSPSGALEEC[418]YVTEIDQDK (+3)	1	2637.14	2638.5	NP_001447.2|,NP_001104026.1|
KGTVEGFEPADNKC[418]LLR (+4)	1	2294.08	1877.13	NP_003125.3|
VNQIGSVTESIQAC[418]K (+2)	1	1993.92	1576.77	NP_001967.3|,NP_443739.3|,NP_001180432.1|
SVSGTDVQEEC[418]REK (+3)	1	1983.83	1566.65	NP_002473.2|,NP_001182122.1|
FDTGNLC[418]M[16]VTGGANLGR (+3)	1	2158.92	2160.07	NP_000998.1|
TPEQC[418]PSVVSLLSESYNPHVR (+3)	1	2759.27	2760.71	NP_001177966.1|,NP_002798.2|
VGM[16]GSGSIC[418]ITQEVLAC[57]GR (+3)	1	2371.04	2372.35	NP_000875.2|
C[57]PEALFQPCFLGMESC[418]GIHETTFNSIM[16]K (+4)	1	3623.54	3134.65	NP_001077007.1|,NP_001093241.1|,XP_003846703.1|,XP_933678.1|,XP_934799.2|
AVVVC[418]PKDEDYK (+3)	1	1782.8	1365.55	NP_004492.2|,NP_114032.2|
VLSLNFSEC[418]HTK (+2)	1	1794.81	1795.7	NP_987100.1|,NP_987101.1|,NP_036429.2|
LTFSC[418]LGGSDNFK (+3)	1	1805.78	1388.54	NP_006592.3|
LC[418]SLFYTNEEVAK (+3)	1	1933.86	1516.71	NP_001181885.1|,NP_954659.1|,NP_061322.2|,NP_001181883.1|,NP_001181884.1|
LVEALC[418]AEHQINLIK (+2)	1	2111.05	2112.14	NP_001007.2|
DVQIGDIVTVGEC[418]RPLSK (+3)	1	2346.13	2347.33	NP_001006.1|
LFLPC[418]PM[16]DVEGSR (+3)	1	1896.82	1897.85	NP_055718.4|
SILSPGGSC[418]GPIK (+2)	1	1632.76	1633.55	NP_001157108.1|,NP_001509.3|,NP_127492.1|,NP_127493.1|,NP_127494.1|
AQNTWGC[418]GNSLR (+2)	1	1723.72	1306.41	NP_005563.1|,NP_733821.1|,NP_733822.1|,NP_001244303.1|
KGEDEDKGPPC[57]GPVNC[418]NEK (+3)	1	2490.03	2016.17	NP_788955.1|,NP_006254.1|
NDIPEIPESIKFC[418]K (+3)	1	2049.95	1632.88	NP_874365.3|,NP_056171.3|
TGVHHYSGNNIELGTAC[418]GK (+3)	1	2375.04	2376.25	NP_000980.1|
DC[57]IGGC[418]SDLVSLQQSGELLTR (+2)	1	2668.19	2669.6	NP_001230587.1|,NP_001230588.1|,NP_002055.1|,NP_001112362.1|
LVILANNC[418]PALR (+2)	1	1713.87	1714.71	NP_000980.1|
LEEEQIILEDQNC[418]K (+2)	1	2120.94	2122	NP_002464.1|
TTHYTPLAC[418]GSNPLK (+3)	1	2019.92	2020.94	NP_001354.1|,NP_001135935.1|
QDKC[418]ALGWDHQEK (+4)	1	1974.84	1557.69	NP_612632.1|,NP_001171669.1|,NP_005222.2|
C[57]VGAELGLDC[418]PGR (+2)	1	1763.74	1764.63	NP_003355.1|,NP_853628.1|
VFIGKDC[418]IGGC[57]SDLVSLQQSGELLTR (+4)	1	3212.53	3214.28	NP_001230587.1|,NP_001230588.1|,NP_002055.1|,NP_001112362.1|
TPQAPFPTC[418]PNR (+2)	1	1745.77	1746.63	NP_065778.3|,NP_001091873.1|,NP_001091872.1|
VEDM[16]AELTC[418]LNEASVLHNLK (+4)	1	2662.21	2229.53	NP_001242941.1|,NP_002464.1|,NP_005955.3|,NP_001243024.1|
NC[418]ISTVVHQGLIR (+2)	1	1856.9	1857.81	NP_008835.5|,NP_001075109.1|
INISEGNC[418]PER (+2)	1	1648.7	1649.47	NP_001092090.1|,NP_005007.2|,NP_114366.1|,NP_001122383.1|,NP_001122384.1|,NP_001122385.1|,NP_001122386.1|,NP_001123613.1|,NP_065389.2|,NP_006187.2|
VC[418]VEHHTFYR (+3)	1	1707.73	1708.58	NP_001186318.1|,NP_001129027.1|,NP_001186317.1|,NP_001239589.1|,NP_001422.1|,NP_001129026.1|
SLLINAVEASC[418]IR (+3)	1	1805.88	1806.76	NP_722546.1|,NP_008838.2|,NP_037460.2|
KC[418]SLPAEEDSVLEK (+3)	1	1964.89	1547.73	NP_002366.2|,NP_001127836.1|
LC[418]DEQLSSQSHYDFGLR (+3)	1	2415.03	2416.26	NP_001367.2|
SAYC[418]LGSSHPR (+3)	1	1594.67	1177.29	NP_055744.2|,NP_001129665.1|,NP_001129666.1|
SSGFLPASQQAC[418]AK (+2)	1	1811.8	1394.55	NP_001077059.1|,NP_060197.4|
LFQEC[418]C[57]PHSTDR (+2)	1	1909.75	1435.58	NP_112553.1|,NP_112552.1|,NP_002131.2|
SEKPPAGSIC[418]R (+3)	1	1561.7	1562.43	NP_003674.1|
GFGHIGIAVPDVYSAC[418]K (+3)	1	2150.99	2152.11	NP_006699.2|
AIC[418]TEAGLM[16]ALR (+2)	1	1681.76	1682.64	NP_002793.2|
DC[418]GATWVVLGHSER (+3)	1	1946.84	1947.81	NP_001244955.1|,NP_000356.1|,NP_001152759.1|
GC[57]ALQC[418]AILSPAFK (+2)	1	1895.87	1896.88	NP_055093.2|,NP_002145.3|
LSTLC[418]PSAVLQR (+2)	1	1704.83	1705.66	NP_060918.2|
NC[418]PHVVVGTPGR (+2)	1	1652.76	1653.55	NP_005795.2|
QM[16]TGKC[418]ELQR (+3)	1	1626.7	1627.52	NP_714913.1|
GHFGPIHC[418]VR (+3)	1	1539.69	1122.3	NP_009109.3|
DC[418]QIAHGAAQFLR (+3)	1	1846.82	1847.73	NP_000929.1|
EAPC[418]VLIYIPDGHTK (+3)	1	2072.97	2074.04	NP_004437.2|
RELHGQNPVVTPC[418]NK (+4)	1	2108.99	1691.91	NP_008938.2|
PVIC[418]ATQM[16]LESM[16]IK (+3)	1	2012.91	1563.94	NP_002645.3|,NP_872270.1|,NP_872271.1|,NP_001193725.1|,NP_001193726.1|,NP_001193727.1|,NP_001193728.1|
GLC[418]EKPLASAAAK (+2)	1	1675.81	1258.49	NP_036602.1|
VAAAESM[16]PLLLEC[418]AR (+3)	1	2006.93	2008	NP_002262.3|
TYIQC[418]IAAISR (+2)	1	1655.78	1656.59	NP_060918.2|
GFC[418]FITYTDEEPVKK (+3)	1	2193.98	1777	NP_001193929.1|,NP_112740.1|
DVIEEYFKC[418]K (+2)	1	1690.74	1691.59	NP_001007.2|
PAPQPPVPRPEHC[418]EGAAAGLK (+4)	1	2539.21	2122.41	NP_006387.1|
VFQFLNAKC[418]ESAFLSK (+3)	1	2249.06	2250.26	NP_000977.1|
GLPWSC[418]SADEVQR (+3)	1	1864.79	1447.57	NP_005511.1|,NP_001244222.1|
SC[418]LLLQFTDK (+2)	1	1584.73	1585.51	NP_002856.1|,NP_116235.2|
AGSVELLGAM[16]AYC[418]APK (+3)	1	2013.9	1580.87	NP_006827.1|
DAAGLEC[418]KPR (+3)	1	1476.65	1059.2	NP_056992.4|,NP_001122324.1|,NP_001122325.1|,NP_001122326.1|
LKPLPGETM[16]EKC[418]TQDLGNSTK (+3)	1	2723.26	2290.61	NP_006280.3|
M[16]RPGVAC[418]SVSQAQK (+2)	1	1894.85	1895.84	NP_000652.2|,NP_001020092.1|
YHIGDEVKC[418]R (+3)	1	1636.71	1219.37	NP_055791.1|
SGGATIEELTEKC[418]K (+2)	1	1882.84	1883.76	NP_115571.1|,NP_620305.1|
ALEFAPAC[418]HR (+3)	1	1531.67	1114.28	NP_003306.3|,NP_001138238.1|
ENVIM[16]SQILPC[418]IK (+3)	1	1920.91	1487.83	NP_055040.2|
LC[418]LTLHNNEGSYLAHTQGK (+4)	1	2516.16	2099.33	NP_009096.2|
SSVTHLLC[418]ASK (+2)	1	1562.72	1563.46	NP_061849.2|
AQASSIPVGSRC[418]EVR (+3)	1	1976.92	1559.75	NP_001272.2|
AVLFC[418]LSEDKK (+2)	1	1669.78	1670.61	NP_005498.1|
AINC[57]ATSGVVGLVNC[418]LR (+3)	1	2164.02	1690	NP_004095.4|
SIDLPIQSSLC[418]R (+2)	1	1748.82	1749.67	NP_055093.2|
FNNYVDC[418]M[16]K (+2)	1	1566.59	1133.3	NP_008835.5|,NP_001075109.1|
SLTIAEFKC[418]K (+2)	1	1556.74	1557.5	NP_001272.2|
M[16]LSC[418]AGADR (+2)	1	1356.53	1357.2	NP_542784.1|,NP_006004.2|,NP_001243506.1|,NP_001243509.1|
EKC[418]PIC[57]VPC[57]GLR (+3)	1	1848.81	1317.64	NP_065801.1|
FSVPHVC[418]AR (+2)	1	1432.64	1015.19	NP_055681.1|
KM[16]C[418]LFAGFQR (+3)	1	1633.72	1634.6	NP_004492.2|,NP_114032.2|
IPGGIIEDSC[418]VLR (+3)	1	1788.85	1371.6	NP_005989.3|,NP_001008800.1|
LPLM[16]EC[418]VQVTK (+2)	1	1693.79	1260.57	NP_001160158.1|,NP_000280.1|,NP_001160159.1|,NP_001160160.1|
NIC[418]VLAHVDHGK (+3)	1	1722.8	1723.64	NP_078856.4|
SGIC[418]SLHPLLR (+3)	1	1612.79	1195.43	NP_060542.4|
SIC[418]EVLDLER (+2)	1	1593.72	1176.34	NP_003463.1|,NP_001128181.1|
VSPC[418]LPVLSR (+2)	1	1487.73	1070.31	NP_036448.1|
TQM[16]SSC[418]VAK (+2)	1	1387.56	954.123	NP_055571.2|,NP_001008938.1|
LC[418]M[16]SLM[16]QNK (+2)	1	1516.62	1067.35	NP_001177966.1|,NP_002798.2|
DLLVQQASQC[418]LSK (+2)	1	1849.87	1432.64	NP_001073027.1|
AHIAQLC[418]EK (+2)	1	1429.65	1430.32	NP_004850.1|,NP_001826.3|,NP_009029.3|
KNILEESLC[418]ELVAK (+2)	1	2005.99	1588.86	NP_008835.5|,NP_001075109.1|
FC[418]LSKPGVYK (+2)	1	1558.73	1141.38	NP_001004067.1|,NP_001004060.1|,NP_775885.1|,NP_055102.3|
KC[418]LQSLC[57]DLR (+2)	1	1652.75	1178.43	NP_055994.2|,NP_001138586.1|
NVHYC[418]TLR (+3)	1	1422.62	1005.15	NP_056271.2|
TPQAPFPTC[418]PNR (+3)	1	1745.77	1328.5	NP_065778.3|,NP_001091873.1|,NP_001091872.1|
LSSPC[418]IM[16]VVNHDASSIPR (+3)	1	2359.08	1926.22	NP_060225.4|,NP_001180384.1|
LM[16]DQNLKC[418]LSAAEEK (+2)	1	2125.95	2127.08	NP_705935.1|,NP_001036817.1|
NSFDC[418]FKK (+3)	1	1405.58	988.118	NP_003696.2|,NP_001153682.1|,NP_055066.1|
FVC[418]VGGSPSR (+2)	1	1425.62	1426.28	NP_003355.1|,NP_853628.1|
ALLPHVLC[418]K (+3)	1	1410.72	993.267	NP_001073027.1|
YTC[418]HVQHEGLPK (+3)	1	1828.8	1411.58	NP_002107.3|,NP_001229687.1|
YNFFTGC[418]PK (+3)	1	1493.61	1076.22	NP_006420.1|,NP_001009570.1|,NP_001159756.1|,NP_001159757.1|
TPC[418]GEGSK (+2)	1	1195.46	777.843	NP_001014.1|,NP_001139699.1|
GGTLFGGEVC[418]K (+2)	1	1484.64	1067.22	NP_003267.1|
AC[418]QVYIQHM[16]R (+3)	1	1681.72	1248.48	NP_002009.1|,NP_001243193.1|,NP_001243194.1|
LPVLAGC[418]LK (+3)	1	1330.68	913.179	NP_008835.5|,NP_001075109.1|
DLM[16]AC[418]AQTGSGK (+2)	1	1614.65	1181.34	NP_001160005.1|,NP_001180345.1|,NP_001180346.1|,NP_001347.3|,NP_004651.2|,NP_001116137.1|,NP_001160006.1|,NP_001136021.1|,NP_077726.1|
HEASDFPC[418]R (+3)	1	1478.57	1061.13	NP_002818.1|
IKNC[418]LNPQFSK (+3)	1	1708.81	1709.65	NP_003900.1|
AYGGSM[16]C[418]AK (+2)	1	1320.49	887.036	NP_000986.2|,NP_296374.1|
ENSGAAEKPVTIHATPEGTSEAC[418]R (+3)	1	2872.28	2455.61	NP_006539.3|,NP_001007226.1|
GLQAFC[418]NLR (+2)	1	1438.65	1021.19	NP_002881.1|,NP_072179.1|
ILDILGETC[418]K (+3)	1	1521.72	1104.32	NP_002958.2|,NP_001188267.1|,NP_001188268.1|,NP_001188269.1|,NP_055464.1|
RYC[418]HDLGER (+3)	1	1565.65	1148.25	NP_055335.2|,NP_001099008.1|
ALANSLAC[418]QGK (+3)	1	1492.68	1493.37	NP_001230106.1|,NP_000025.1|,NP_908930.1|,NP_908932.1|,NP_001121089.1|
KNASC[418]GTR (+2)	1	1253.53	1254.06	NP_006799.1|
M[16]PNQHAC[418]K (+3)	1	1361.53	928.091	NP_060663.2|,NP_001106849.1|
GKNC[418]VAIAADR (+3)	1	1534.7	1535.41	NP_002786.2|
LTTINC[418]EEGDKLK (+2)	1	1880.86	1463.65	NP_001193496.1|,NP_005522.2|
AALEALGSC[418]LNNK (+3)	1	1720.79	1303.48	NP_005403.2|,NP_001159828.1|,NP_001159829.1|,NP_001159830.1|,NP_001159831.1|
VGAPLVC[418]C[57]EIK (+2)	1	1605.74	1131.41	NP_004448.2|,NP_976251.1|
PWC[418]TSLR (+2)	1	1279.55	862.008	NP_002261.3|,NP_694858.1|
KGDEC[418]ELLGHSK (+2)	1	1732.75	1733.58	NP_003312.3|
AVEC[418]PPPR (+2)	1	1285.56	868.012	NP_005539.1|,NP_001123561.1|
TFEVC[418]DLPVR (+2)	1	1595.71	1178.36	NP_004757.1|
KNYC[418]NIQVTK (+3)	1	1627.75	1210.4	NP_001646.2|,NP_001135753.1|
FC[418]HNNKK (+3)	1	1307.55	890.021	NP_001960.2|,NP_892116.2|
LNQWC[418]NVVR (+2)	1	1548.7	1131.31	NP_004437.2|
GLDVNKC[418]EIAR (+2)	1	1634.75	1217.4	NP_055140.1|
LQPIALSC[57]VLNIGAC[418]K (+3)	1	2117.05	1643.02	NP_005029.1|
SAC[418]GVC[57]PGR (+2)	1	1323.52	848.991	NP_000986.2|,NP_296374.1|
AVLC[418]PPPVKK (+3)	1	1468.76	1051.35	NP_008839.2|,NP_061485.1|,NP_005043.1|
VC[418]EIHFHEINNK (+3)	1	1899.84	1900.79	NP_002433.1|,NP_733839.1|,NP_620412.1|
LC[418]FLDKVEPHATIAEIK (+4)	1	2344.16	1927.27	NP_612510.1|
ILEPHNGKC[418]R (+3)	1	1583.73	1166.35	NP_002818.1|
VC[418]ALGGSK (+2)	1	1151.51	733.877	NP_059830.1|,NP_005103.2|
GEHGFIGC[418]R (+2)	1	1392.57	1393.21	NP_003079.1|
AHQLVLPPC[418]DVVIK (+3)	1	1948.99	1531.86	NP_055427.2|
PM[16]EVFM[16]C[418]SVLK (+3)	1	1732.73	1283.62	NP_001136120.1|,NP_064535.1|
RIC[418]NAVSPDK (+3)	1	1519.69	1102.27	NP_006627.2|
SC[418]QVSHR (+3)	1	1233.5	815.898	NP_001041660.1|
SC[418]QVSHR (+2)	1	1233.5	815.898	NP_001041660.1|
GLC[418]GAIHSSIAK (+3)	1	1573.74	1156.36	NP_005165.1|,NP_001001973.1|
EKLC[418]FLDK (+2)	1	1412.65	1413.32	NP_612510.1|
AADALEEQQRC[418]ISELK (+3)	1	2221.01	1803.99	NP_006176.2|
LLEKC[418]AM[16]TALSSK (+2)	1	1827.86	1394.7	NP_006420.1|,NP_001159756.1|,NP_001159757.1|
AVYTQDC[418]PLAAAK (+3)	1	1767.8	1350.54	NP_001596.2|
KVC[418]GDSDK (+2)	1	1268.52	850.937	NP_001009186.1|,NP_001753.1|
VLC[418]PVIGK (+3)	1	1245.62	828.074	NP_004183.2|,NP_001166945.1|
LSC[418]LPAFK (+2)	1	1295.6	1296.22	NP_001367.2|
AFVKC[418]TK (+3)	1	1213.56	795.989	NP_060441.2|
VGC[418]VWQTVR (+2)	1	1464.66	1047.23	NP_004184.1|,NP_001186307.1|,NP_001186308.1|
EYVKC[418]LENR (+2)	1	1570.69	1571.44	NP_898829.1|,NP_898830.1|,NP_874386.1|,NP_874389.1|,NP_874390.1|,NP_874392.1|,NP_898831.1|,NP_005162.1|,NP_604391.1|,NP_004370.1|
KAC[418]TYIR (+3)	1	1271.58	1272.16	NP_002942.2|
LFQC[418]LLHR (+2)	1	1446.69	1029.26	NP_066964.1|
TNKPC[418]GK (+3)	1	1164.51	746.876	NP_057651.1|,NP_510868.1|,NP_510869.1|
RC[418]LLDTFK (+3)	1	1412.66	1413.33	NP_110395.1|
VRC[418]WQYR (+3)	1	1427.62	1010.17	NP_002939.2|,NP_001240308.1|,NP_001240309.1|,NP_001240311.1|,NP_001240312.1|,NP_001240313.1|
VQC[418]AGGPR (+2)	1	1204.51	786.9	NP_055746.3|
LVC[418]LDVSENR (+2)	1	1564.7	1565.43	NP_874365.3|,NP_056171.3|
KC[418]EPIIMTVPR (+3)	1	1703.82	1286.61	NP_055140.1|
LTC[418]LFQIK (+2)	1	1382.67	965.21	NP_055486.2|
KC[418]YLEQK (+3)	1	1328.59	911.077	NP_001139624.1|,NP_000777.1|
SSGC[418]FPNM[16]AAK (+3)	1	1545.61	1112.28	NP_003925.1|
SGSC[418]SAIR (+2)	1	1197.49	779.863	NP_056474.2|
TLQKC[418]EK (+2)	1	1266.57	849.007	NP_057371.2|
QLSSC[418]LPNIVPK (+2)	1	1715.84	1298.55	NP_006827.1|
VIPEYC[418]R (+2)	1	1296.56	879.035	NP_001646.2|
IC[418]SKPVVLPK (+3)	1	1500.78	1083.39	NP_008835.5|,NP_001075109.1|
RGPC[418]IIYNEDNGIIK (+2)	1	2122	2123.08	NP_000959.2|
FC[418]ELLIHR (+3)	1	1447.67	1030.24	NP_060217.1|,NP_065741.3|
LLQC[418]LHAK (+3)	1	1342.65	925.15	NP_055950.1|
LNEC[418]VDHTPK (+2)	1	1572.67	1155.28	NP_004823.1|,NP_001177931.1|,NP_001177932.1|
ERIC[418]SEEER (+2)	1	1567.64	1150.22	NP_060282.1|
TLQKC[418]EK (+3)	1	1266.57	849.007	NP_057371.2|
NGPPPC[418]PR (+2)	1	1254.53	836.959	NP_005325.2|
ATHVAFDC[418]M[16]K (+2)	1	1555.63	1122.32	NP_060831.2|
GC[418]VVGTK (+2)	1	1080.47	1080.93	NP_000958.1|,NP_001029025.1|
ALIHSAC[418]VK (+2)	1	1358.65	941.149	NP_001880.2|,NP_001123514.1|,NP_001123515.1|
GQTVC[418]NVK (+2)	1	1265.55	847.98	NP_055950.1|
LQKC[418]NSK (+3)	1	1237.56	819.97	NP_005710.1|
GFSIPEC[418]QK (+2)	1	1425.61	1008.15	NP_004068.2|
NC[57]C[418]FEHR (+3)	1	1382.5	908.017	NP_057542.2|,XP_001126758.1|
KC[418]LISEM[16]AK (+2)	1	1455.66	1022.28	NP_060621.3|
LLQC[418]LHAK (+2)	1	1342.65	925.15	NP_055950.1|
SVC[418]LIGDK (+2)	1	1251.56	833.993	NP_003592.3|
KGTQC[418]VEQIQELVLR (+3)	1	2161.07	1744.02	NP_057651.1|,NP_510868.1|,NP_510869.1|
KLTEC[418]QLK (+2)	1	1379.66	962.165	NP_056655.2|,NP_056656.2|,NP_001102.2|,NP_001020278.1|,NP_001180424.1|
KLC[418]DNLR (+2)	1	1278.58	861.021	NP_003741.1|
ISC[418]M[16]SKPPAPNPTPPR (+2)	1	2125.97	1693	NP_659731.1|
SC[418]KPKPIGK (+3)	1	1374.68	1375.32	NP_005947.3|
QTSQC[418]LK (+2)	1	1224.53	806.928	NP_064502.9|
IC[418]ANHYITPM[16]M[16]ELKPNAGSDR (+3)	1	2810.23	2361.72	NP_002873.1|
AYQC[418]VVLLQGK (+2)	1	1638.79	1221.47	NP_002878.2|
LQGATC[418]NNNK (+2)	1	1479.62	1062.16	NP_001367.2|
DKVQC[418]ILR (+3)	1	1391.67	974.179	NP_056450.2|
AYEDGC[418]K (+2)	1	1202.44	784.834	NP_006810.1|
AC[418]AEALR (+2)	1	1150.49	732.849	NP_006387.1|
AVSEVC[418]R (+2)	1	1180.5	1181.01	NP_001035828.1|,NP_004591.2|,NP_001035829.2|,NP_001166995.1|,NP_001166996.1|
AAVPLGGFLC[418]NVADK (+3)	1	1891.9	1474.72	NP_068598.1|
KC[418]QQAEK (+3)	1	1251.54	833.953	NP_006810.1|
SGIQPLC[418]PER (+2)	1	1516.68	1099.26	NP_003267.1|
LLC[418]NFM[16]R (+2)	1	1329.57	896.132	NP_683877.1|,NP_002777.1|,NP_001137409.1|
QIPSDGHC[418]M[16]YK (+3)	1	1711.68	1278.46	NP_057107.3|
LLSLLPLSC[418]QK (+3)	1	1631.84	1214.52	NP_066918.2|
KHVSRAYGGSMC[418]AK (+3)	1	1911.85	1494.74	NP_000986.2|,NP_296374.1|
QC[418]RIYELRNK (+2)	1	1739.82	1322.54	NP_002788.1|,NP_001138404.1|,NP_001124197.1|
PGLC[418]LGRIDPK (+2)	1	1585.77	1168.41	NP_055426.1|
YESLELC[418]R (+3)	1	1429.6	1012.14	NP_004850.1|
DLEEDHAC[418]IPIKK (+4)	1	1927.88	1510.71	NP_001952.1|
GC[418]PFHR (+2)	1	1133.45	715.823	NP_005029.1|
NLETPLC[418]K (+2)	1	1334.6	1335.21	NP_001186128.1|,NP_037543.1|,NP_001616.1|
INSYC[418]K (+2)	1	1144.47	726.841	NP_055426.1|
LSC[418]FHQLLLEPPK (+3)	1	1941.95	1942.96	NP_055746.3|
QVAASTAQLLVAC[418]K (+3)	1	1819.9	1402.66	NP_055874.2|,NP_006280.3|
RC[418]QYVTEK (+3)	1	1443.63	1444.3	NP_001230106.1|,NP_000025.1|,NP_908930.1|,NP_908932.1|,NP_001121089.1|,NP_005156.1|
VKDYGC[418]IVK (+2)	1	1441.67	1024.23	NP_055791.1|
SPC[418]PQEK (+2)	1	1205.48	787.881	NP_057417.3|
VVNC[418]AR (+2)	1	1078.47	660.787	NP_006614.2|
NIQAC[418]K (+2)	1	1093.47	675.798	NP_006576.2|
GC[418]AVVEFK (+2)	1	1269.55	1270.14	NP_005959.2|,NP_112480.2|
SILC[57]C[418]LR (+3)	1	1281.57	807.037	NP_006592.3|
VAEC[418]QR (+2)	1	1122.46	704.796	NP_008996.1|
SKPC[418]GSPR (+2)	1	1248.54	830.952	NP_004136.2|,NP_001123537.1|
AC[418]LEHR (+3)	1	1145.47	727.833	NP_057535.1|,NP_001137533.1|,NP_001137534.1|
SILC[418]C[57]LR (+2)	1	1281.57	807.037	NP_006592.3|
PMC[418]VESFSQYPPLGR (+3)	1	2127.92	1710.97	NP_001949.1|
VSEC[57]C[418]R (+2)	1	1170.43	695.809	NP_001026859.1|
M[16]SC[418]FSR (+2)	1	1163.42	729.868	NP_057417.3|
IKNC[418]LNPQFSK (+2)	1	1708.81	1291.52	NP_003900.1|
AAC[418]HLK (+3)	1	1059.46	641.783	NP_006800.2|,NP_061141.2|,NP_001034764.1|
IAVAAQNC[418]YK (+3)	1	1497.67	1080.26	NP_000356.1|,NP_001152759.1|
C[418]AC[418]SKGSLREKSLR (+3)	1	2373.05	1537.81	XXX_NP_008858.1|
RNPYC[418]R (+3)	1	1225.51	807.921	NP_060596.2|
ESYC[418]QR (+2)	1	1202.45	784.838	NP_003343.1|,NP_001005781.1|,NP_001005782.1|
KDEQERC[418]ITIK (+3)	1	1779.83	1362.55	NP_001952.1|
FNNYVDC[418]M[16]KK (+2)	1	1694.69	1261.47	NP_008835.5|,NP_001075109.1|
IQVSELC[418]K (+2)	1	1336.62	1337.23	NP_036333.2|,NP_001139138.1|,NP_001139139.1|
DRC[418]TLAEK (+2)	1	1352.59	1353.19	NP_005498.1|
LRC[418]DSADLR (+3)	1	1465.64	1466.31	NP_001070908.1|,NP_055554.1|,NP_001070909.1|
VGEVC[57]HITC[418]KPEYAYGSAGSPPK (+4)	1	2867.27	2868.85	NP_002005.1|
HLPGVC[418]K (+2)	1	1170.53	1171.06	NP_001164014.1|,NP_001164015.1|,NP_612642.2|
TREEEC[418]HFYAGGQVYPGEASR (+4)	1	2803.18	2804.64	NP_006397.1|
KC[418]GPNILVNK (+3)	1	1502.74	1503.45	NP_078856.4|
LESGSIC[418]K (+2)	1	1253.54	1254.1	NP_002085.2|,NP_001123478.1|,NP_001123479.1|
KC[418]DLISIPK (+2)	1	1433.7	1434.39	NP_055140.1|
IC[418]NAVSPDKDVDGFHVINVGR (+4)	1	2672.25	2673.64	NP_006627.2|
TVIGC[418]SGFHGDC[57]LTLTK (+3)	1	2225.99	2227.17	NP_002784.1|
SGIC[418]SLHPLLR (+2)	1	1612.79	1613.57	NP_060542.4|
LQISHEAAAC[418]ITGLR (+3)	1	1999.96	2000.95	NP_001348.2|
ALTNLPHTDFTLC[418]K (+3)	1	1990.93	1991.94	NP_037366.1|
C[418]C[57]SGAIIVLTK (+3)	1	1581.74	1582.54	NP_002645.3|,NP_001193726.1|,NP_001193727.1|
TC[418]GFDFTGAVEDISK (+3)	1	2006.84	2007.85	NP_002071.2|
ALANVNIGSLIC[418]NVGAGGPAPAAGAAPAGGPAPSTAAAPAEEK (+3)	1	4169.03	4171.29	NP_000994.1|,NP_998890.1|
RTGC[418]IGAK (+3)	1	1222.56	1223.09	NP_000966.2|,NP_001186731.1|
YRC[418]NVENLPR (+3)	1	1680.75	1681.56	NP_036333.2|,NP_001139138.1|,NP_001139139.1|
VFNDTC[418]R (+2)	1	1271.51	1272.07	NP_573566.2|
TLVGIC[418]SEHQSR (+3)	1	1746.78	1747.61	NP_061141.2|,NP_001034764.1|
VC[418]EEIAIIPSKK (+2)	1	1746.87	1747.74	NP_001012.1|,NP_001185986.1|
HQAC[418]LLLQK (+2)	1	1470.71	1471.41	NP_055335.2|,NP_001099008.1|
YESLELC[418]R (+2)	1	1429.6	1430.27	NP_004850.1|
SLHDALC[418]VIR (+2)	1	1543.73	1544.46	NP_036205.1|
ALANVNIGSLIC[418]NVGAGGPAPAAGAAPAGGPAPSTAAAPAEEK (+4)	1	4169.03	4171.29	NP_000994.1|,NP_998890.1|

## Sheet: Protein View
Accession	Cluster	Count	Coverage	Protein Group	Gene Id	Gene Name	Chromosome	Gene Family	Distinct Peptides	Distinct Matches	Filtered Spectra	Description	Modified Sites
NP_008835.5|,NP_001075109.1|	56	2	7.22199	68	PRKDC	protein kinase, DNA-activated, catalytic polypeptide	8q11		26	41	73	|PRKDC|5591|P78527|DNA-dependent protein kinase catalytic subunit isoform 2 [Homo sapiens]	418@C25,418@C4061,418@C4030,418@C2469,418@C1904,418@C3837,418@C3806,418@C1128,418@C1127,418@C2342,418@C1507,418@C373,418@C1742,418@C232,418@C1455,418@C2435,418@C2093,418@C223,418@C1364,418@C2363,418@C458,418@C457,418@C1629,418@C1183,418@C3347,418@C478,418@C491
NP_008835.5|			7.19477		PRKDC	protein kinase, DNA-activated, catalytic polypeptide	8q11					|PRKDC|5591|P78527|DNA-dependent protein kinase catalytic subunit isoform 1 [Homo sapiens]	418@C25,418@C223,418@C232,418@C373,418@C458,418@C457,418@C478,418@C491,418@C1128,418@C1127,418@C1183,418@C1364,418@C1455,418@C1507,418@C1629,418@C1742,418@C1904,418@C2093,418@C2342,418@C2363,418@C2435,418@C2469,418@C3347,418@C3837,418@C4061
NP_001075109.1|			7.24921		PRKDC	protein kinase, DNA-activated, catalytic polypeptide	8q11					|PRKDC|5591|P78527|DNA-dependent protein kinase catalytic subunit isoform 2 [Homo sapiens]	418@C25,418@C223,418@C232,418@C373,418@C458,418@C457,418@C478,418@C491,418@C1128,418@C1127,418@C1183,418@C1364,418@C1455,418@C1507,418@C1629,418@C1742,418@C1904,418@C2093,418@C2342,418@C2363,418@C2435,418@C2469,418@C3347,418@C3806,418@C4030
NP_001447.2|,NP_001104026.1|	249	2	12.5615	308	FLNA	filamin A, alpha	Xq28		16	22	41	|FLNA|2316|P21333;Q60FE5;Q6NXF2|filamin-A isoform 2 [Homo sapiens]	418@C1018,418@C2152,418@C2160,418@C2535,418@C2543,418@C2191,418@C2199,418@C1157,418@C1453,418@C574,418@C1165,418@C478,418@C53,418@C1402,418@C1715,418@C1723,418@C1989,418@C1997,418@C2593,418@C2601,418@C2370,418@C2378
NP_001447.2|			12.5805		FLNA	filamin A, alpha	Xq28					|FLNA|2316|P21333;Q60FE5;Q6NXF2|filamin-A isoform 1 [Homo sapiens]	418@C53,418@C478,418@C574,418@C1018,418@C1157,418@C1165,418@C1402,418@C1453,418@C1715,418@C1989,418@C2152,418@C2191,418@C2370,418@C2535,418@C2593
NP_001104026.1|			12.5425		FLNA	filamin A, alpha	Xq28					|FLNA|2316|P21333;Q60FE5;Q6NXF2|filamin-A isoform 2 [Homo sapiens]	418@C53,418@C478,418@C574,418@C1018,418@C1157,418@C1165,418@C1402,418@C1453,418@C1723,418@C1997,418@C2160,418@C2199,418@C2378,418@C2543,418@C2601
NP_005498.1|	148	1	69.8795	190	CFL1	cofilin 1 (non-muscle)	11q13.1		6	12	31	|CFL1|1072|P23528|cofilin-1 [Homo sapiens]	418@C147,418@C139,418@C39,418@C80
NP_002037.2|	344	1	50.7463	443	GAPDH	glyceraldehyde-3-phosphate dehydrogenase	12p13.31		2	6	30	|GAPDH|2597|P04406|glyceraldehyde-3-phosphate dehydrogenase isoform 1 [Homo sapiens]	418@C152,418@C156,418@C247
NP_001243728.1|	344	1	55.6314	896	GAPDH	glyceraldehyde-3-phosphate dehydrogenase	12p13.31		2	6	30	|GAPDH|2597|P04406;E7EUT4|glyceraldehyde-3-phosphate dehydrogenase isoform 2 [Homo sapiens]	418@C110,418@C114,418@C205
NP_001367.2|	692	1	4.13259	867	DYNC1H1	dynein, cytoplasmic 1, heavy chain 1	14q32.31	DYN	12	16	29	|DYNC1H1|1778|Q14204|cytoplasmic dynein 1 heavy chain 1 [Homo sapiens]	418@C1888,418@C867,418@C4121,418@C633,418@C3712,418@C1999,418@C1977,418@C3389,418@C978,418@C2076,418@C3940,418@C4570
NP_004850.1|	485	1	12.4179	1019	CLTC	clathrin, heavy chain (Hc)	17q23.1		9	14	29	|CLTC|1213|Q00610|clathrin heavy chain 1 [Homo sapiens]	418@C1102,418@C870,418@C918,418@C1205,418@C491,418@C617,418@C736,418@C436
NP_004492.2|,NP_114032.2|	621	2	21.7074	772	HNRNPU	heterogeneous nuclear ribonucleoprotein U (scaffold attachment factor A)	1q44		9	13	27	|HNRNPU|3192|Q00839;Q96BA7|heterogeneous nuclear ribonucleoprotein U isoform a [Homo sapiens]	418@C478,418@C497,418@C575,418@C594,418@C588,418@C607,418@C316,418@C335,418@C543,418@C562
NP_004492.2|			21.9603		HNRNPU	heterogeneous nuclear ribonucleoprotein U (scaffold attachment factor A)	1q44					|HNRNPU|3192|Q00839|heterogeneous nuclear ribonucleoprotein U isoform b [Homo sapiens]	418@C316,418@C478,418@C543,418@C575,418@C588
NP_114032.2|			21.4545		HNRNPU	heterogeneous nuclear ribonucleoprotein U (scaffold attachment factor A)	1q44					|HNRNPU|3192|Q00839;Q96BA7|heterogeneous nuclear ribonucleoprotein U isoform a [Homo sapiens]	418@C335,418@C497,418@C562,418@C594,418@C607
NP_001393.1|	827	1	39.1775	1063	EEF1A1	eukaryotic translation elongation factor 1 alpha 1	6q14.1		5	10	27	|EEF1A1|1915|P68104;Q6IPS9|elongation factor 1-alpha 1 [Homo sapiens]	418@C411,418@C234
NP_006079.1|	702	1	42.4719	1088	TUBB4B	tubulin, beta 4B class IVb	9q34.3	TUB	3	7	27	|TUBB4B|10383|P68371|tubulin beta-4B chain [Homo sapiens]	418@C12,418@C239,418@C303
NP_006078.2|	702	1	35.1351	1089	TUBB4A	tubulin, beta 4A class IVa	19p13.3	TUB	3	7	27	|TUBB4A|10382|P04350|tubulin beta-4A chain [Homo sapiens]	418@C12,418@C239,418@C303
NP_001193726.1|	183	1	47.2648	1039	PKM	pyruvate kinase, muscle	15q23		6	13	26	|PKM|5315|P14618;B4DNK4|pyruvate kinase isozymes M1/M2 isoform d [Homo sapiens]	418@C284,418@C252,418@C49,418@C400,418@C350,418@C349
NP_002645.3|	183	1	51.4124	1040	PKM	pyruvate kinase, muscle	15q23		6	13	26	|PKM|5315|P14618|pyruvate kinase isozymes M1/M2 isoform a [Homo sapiens]	418@C358,418@C326,418@C49,418@C474,418@C424,418@C423
NP_002464.1|	533	1	9.54082	656	MYH9	myosin, heavy chain 9, non-muscle	22q13.1	MYHII	10	14	25	|MYH9|4627|P35579;Q60FE2|myosin-9 [Homo sapiens]	418@C91,418@C1379,418@C917,418@C988,418@C569,418@C671,418@C740
NP_002147.2|,NP_955472.1|	193	2	46.9459	238	HSPD1	heat shock 60kDa protein 1 (chaperonin)	2q33.1	CHAP	2	4	25	|HSPD1|3329|P10809|60 kDa heat shock protein, mitochondrial [Homo sapiens]	418@C442,418@C237
NP_002147.2|			46.9459		HSPD1	heat shock 60kDa protein 1 (chaperonin)	2q33.1	CHAP				|HSPD1|3329|P10809|60 kDa heat shock protein, mitochondrial [Homo sapiens]	418@C237,418@C442
NP_955472.1|			46.9459		HSPD1	heat shock 60kDa protein 1 (chaperonin)	2q33.1	CHAP				|HSPD1|3329|P10809|60 kDa heat shock protein, mitochondrial [Homo sapiens]	418@C237,418@C442
NP_006827.1|	644	1	5.05429	802	GCN1L1	GCN1 general control of amino-acid synthesis 1-like 1 (yeast)	12q24.2		9	12	24	|GCN1L1|10985|Q92616|translational activator GCN1 [Homo sapiens]	418@C36,418@C1275,418@C907,418@C932,418@C1595,418@C2255,418@C2015,418@C1527,418@C1535
NP_872270.1|,NP_872271.1|,NP_001193725.1|,NP_001193728.1|	183	4	44.6209	1041	PKM	pyruvate kinase, muscle	15q23		5	10	23	|PKM|5315|P14618|pyruvate kinase isozymes M1/M2 isoform f [Homo sapiens]	418@C358,418@C432,418@C363,418@C326,418@C400,418@C331,418@C49,418@C123,418@C54,418@C474,418@C548,418@C479
NP_872270.1|			46.1394		PKM	pyruvate kinase, muscle	15q23					|PKM|5315|P14618|pyruvate kinase isozymes M1/M2 isoform b [Homo sapiens]	418@C49,418@C326,418@C358,418@C474
NP_872271.1|			46.1394		PKM	pyruvate kinase, muscle	15q23					|PKM|5315|P14618|pyruvate kinase isozymes M1/M2 isoform b [Homo sapiens]	418@C49,418@C326,418@C358,418@C474
NP_001193725.1|			40.4959		PKM	pyruvate kinase, muscle	15q23					|PKM|5315|P14618|pyruvate kinase isozymes M1/M2 isoform c [Homo sapiens]	418@C123,418@C400,418@C432,418@C548
NP_001193728.1|			45.709		PKM	pyruvate kinase, muscle	15q23					|PKM|5315|P14618|pyruvate kinase isozymes M1/M2 isoform f [Homo sapiens]	418@C54,418@C331,418@C363,418@C479
NP_001193727.1|	183	1	43.7984	227	PKM	pyruvate kinase, muscle	15q23		5	11	22	|PKM|5315|P14618|pyruvate kinase isozymes M1/M2 isoform e [Homo sapiens]	418@C343,418@C311,418@C459,418@C409,418@C408
NP_821133.1|	702	1	41.4414	1090	TUBB	tubulin, beta class I	6p21.33	TUB	3	7	22	|TUBB|203068|P07437;Q5SU16|tubulin beta chain [Homo sapiens]	418@C12,418@C239,418@C303
NP_821080.1|,NP_001060.1|	702	2	34.382	1092	TUBB2A	tubulin, beta 2A class IIa	6p25.2	TUB	3	7	22	|TUBB2A|7280|Q13885|tubulin beta-2A chain [Homo sapiens]	418@C12,418@C239,418@C303
NP_821080.1|			34.382		TUBB2B	tubulin, beta 2B class IIb	6p25.2	TUB				|TUBB2B|347733|Q9BVA1|tubulin beta-2B chain [Homo sapiens]	418@C12,418@C239,418@C303
NP_001060.1|			34.382		TUBB2A	tubulin, beta 2A class IIa	6p25.2	TUB				|TUBB2A|7280|Q13885|tubulin beta-2A chain [Homo sapiens]	418@C12,418@C239,418@C303
NP_005991.1|	753	1	30.3571	950	TUBA4A	tubulin, alpha 4a	2q36.1	TUB	4	9	21	|TUBA4A|7277|P68366|tubulin alpha-4A chain [Homo sapiens]	418@C295,418@C376,418@C347,418@C316,418@C315
NP_006073.2|	753	1	44.1242	1114	TUBA1B	tubulin, alpha 1b	12q13.12	TUB	4	9	21	|TUBA1B|10376|P68363|tubulin alpha-1B chain [Homo sapiens]	418@C295,418@C376,418@C347,418@C316,418@C315
NP_000997.1|	282	1	42.0455	346	RPS3A	ribosomal protein S3A	4q31.2-q31.3	RPS	5	9	20	|RPS3A|6189|P61247|40S ribosomal protein S3a isoform 1 [Homo sapiens]	418@C201,418@C96,418@C139,418@C111
NP_001307.2|	202	1	9.47477	256	CSE1L	CSE1 chromosome segregation 1-like (yeast)	20q13	XPO	7	9	19	|CSE1L|1434|P55060|exportin-2 isoform 1 [Homo sapiens]	418@C85,418@C272,418@C61,418@C344,418@C842,418@C939,418@C387
NP_001952.1|	574	1	38.1119	708	EEF2	eukaryotic translation elongation factor 2	19p13.3		7	9	19	|EEF2|1938|P13639|elongation factor 2 [Homo sapiens]	418@C369,418@C591,418@C41,418@C728,418@C693,418@C567,418@C67
NP_004437.2|	815	1	6.61376	1051	EPRS	glutamyl-prolyl-tRNA synthetase	1q41	aaRS2	7	10	18	|EPRS|2058|P07814|bifunctional glutamate/proline--tRNA ligase [Homo sapiens]	418@C1487,418@C1480,418@C1076,418@C856,418@C336,418@C1377,418@C697,418@C1148
NP_036205.1|	140	1	11.4603	242	CCT5	chaperonin containing TCP1, subunit 5 (epsilon)	5p15.2	CHAP	4	8	18	|CCT5|22948|P48643|T-complex protein 1 subunit epsilon [Homo sapiens]	418@C253,418@C493,418@C407,418@C181
NP_006000.2|,NP_001257328.1|,NP_001257329.1|	753	3	42.3983	1115	TUBA1A	tubulin, alpha 1a	12q13.12	TUB	3	7	18	|TUBA1A|7846|-|tubulin alpha-1A chain isoform 2 [Homo sapiens]	418@C295,418@C260,418@C376,418@C341,418@C316,418@C281,418@C315,418@C280
NP_006000.2|			41.2417		TUBA1A	tubulin, alpha 1a	12q13.12	TUB				|TUBA1A|7846|Q71U36|tubulin alpha-1A chain isoform 1 [Homo sapiens]	418@C295,418@C316,418@C315,418@C376
NP_001257328.1|			41.2417		TUBA1A	tubulin, alpha 1a	12q13.12	TUB				|TUBA1A|7846|-|tubulin alpha-1A chain isoform 1 [Homo sapiens]	418@C295,418@C316,418@C315,418@C376
NP_001257329.1|			44.7115		TUBA1A	tubulin, alpha 1a	12q13.12	TUB				|TUBA1A|7846|-|tubulin alpha-1A chain isoform 2 [Homo sapiens]	418@C260,418@C281,418@C280,418@C341
NP_733765.1|	34	1	7.10173	967	ATP2A2	ATPase, Ca++ transporting, cardiac muscle, slow twitch 2	12q24.11	PATP	6	9	17	|ATP2A2|488|P16615|sarcoplasmic/endoplasmic reticulum calcium ATPase 2 isoform b [Homo sapiens]	418@C997,418@C498,418@C524,418@C447,418@C471,418@C635
NP_004823.1|,NP_001177932.1|	349	2	20.3417	433	GSTO1	glutathione S-transferase omega 1	10q25.1	SGST	3	5	17	|GSTO1|9446|D3DRA3|glutathione S-transferase omega-1 isoform 3 [Homo sapiens]	418@C192,418@C164,418@C32,418@C4
NP_004823.1|			19.0871		GSTO1	glutathione S-transferase omega 1	10q25.1	SGST				|GSTO1|9446|P78417|glutathione S-transferase omega-1 isoform 1 [Homo sapiens]	418@C32,418@C192
NP_001177932.1|			21.5962		GSTO1	glutathione S-transferase omega 1	10q25.1	SGST				|GSTO1|9446|D3DRA3|glutathione S-transferase omega-1 isoform 3 [Homo sapiens]	418@C4,418@C164
NP_001177931.1|	349	1	17.7885	434	GSTO1	glutathione S-transferase omega 1	10q25.1	SGST	3	5	17	|GSTO1|9446|F5H7H0|glutathione S-transferase omega-1 isoform 2 [Homo sapiens]	418@C159,418@C32
NP_001448.2|,NP_001157789.1|,NP_001157790.1|,NP_001157791.1|	249	4	4.72924	310	FLNB	filamin B, beta	3p14.3		6	9	16	|FLNB|2317|O75369|filamin-B isoform 4 [Homo sapiens]	418@C660,418@C991,418@C2501,418@C2532,418@C2490,418@C2477,418@C26,418@C2154,418@C2185,418@C2143,418@C2130,418@C2333,418@C2364,418@C2322,418@C2309
NP_001448.2|			4.72713		FLNB	filamin B, beta	3p14.3					|FLNB|2317|O75369|filamin-B isoform 2 [Homo sapiens]	418@C26,418@C660,418@C991,418@C2154,418@C2333,418@C2501
NP_001157789.1|			4.67148		FLNB	filamin B, beta	3p14.3					|FLNB|2317|O75369|filamin-B isoform 1 [Homo sapiens]	418@C26,418@C660,418@C991,418@C2185,418@C2364,418@C2532
NP_001157790.1|			4.7472		FLNB	filamin B, beta	3p14.3					|FLNB|2317|O75369|filamin-B isoform 3 [Homo sapiens]	418@C26,418@C660,418@C991,418@C2143,418@C2322,418@C2490
NP_001157791.1|			4.77114		FLNB	filamin B, beta	3p14.3					|FLNB|2317|O75369|filamin-B isoform 4 [Homo sapiens]	418@C26,418@C660,418@C991,418@C2130,418@C2309,418@C2477
NP_001188412.1|	198	1	36.9501	821	ENO1	enolase 1, (alpha)	1p36.2		3	5	16	|ENO1|2023|P06733;E2DRY6|c-myc promoter-binding protein-1 isoform MBP-1 [Homo sapiens]	418@C264,418@C246,418@C244,418@C306
NP_001419.1|	198	1	45.1613	891	ENO1	enolase 1, (alpha)	1p36.2		3	5	16	|ENO1|2023|P06733|alpha-enolase isoform 1 [Homo sapiens]	418@C357,418@C339,418@C337,418@C399
NP_001243064.1|	202	1	8.63388	255	CSE1L	CSE1 chromosome segregation 1-like (yeast)	20q13	XPO	6	7	15	|CSE1L|1434|P55060;A3RLL6;F8W904|exportin-2 isoform 2 [Homo sapiens]	418@C85,418@C61,418@C288,418@C786,418@C883,418@C331
NP_003312.3|	218	1	28.5714	274	TUFM	Tu translation elongation factor, mitochondrial	16p11.2		4	8	15	|TUFM|7284|P49411|elongation factor Tu, mitochondrial precursor [Homo sapiens]	418@C225,418@C150,418@C293
NP_006077.2|	702	1	25.1111	1091	TUBB3	tubulin, beta 3 class III	16q24.3	TUB	2	5	15	|TUBB3|10381|Q13509;Q53G92|tubulin beta-3 chain isoform 1 [Homo sapiens]	418@C12,418@C303
NP_000356.1|,NP_001152759.1|	101	2	65.3593	124	TPI1	triosephosphate isomerase 1	12p13.31		5	6	14	|TPI1|7167|P60174|triosephosphate isomerase isoform 2 [Homo sapiens]	418@C42,418@C79,418@C127,418@C164,418@C67,418@C104,418@C218,418@C255,418@C87,418@C124
NP_000356.1|			69.8795		TPI1	triosephosphate isomerase 1	12p13.31					|TPI1|7167|P60174;Q53HE2|triosephosphate isomerase isoform 1 [Homo sapiens]	418@C42,418@C67,418@C87,418@C127,418@C218
NP_001152759.1|			60.8392		TPI1	triosephosphate isomerase 1	12p13.31					|TPI1|7167|P60174|triosephosphate isomerase isoform 2 [Homo sapiens]	418@C79,418@C104,418@C124,418@C164,418@C255
NP_001000.2|	229	1	31.3725	410	RPS5	ribosomal protein S5	19q13.4	RPS	3	5	14	|RPS5|6193|P46782|40S ribosomal protein S5 [Homo sapiens]	418@C155,418@C66
NP_001138632.1|	126	1	20.4225	414	TPM4	tropomyosin 4	19p13.1	TPM	3	6	14	|TPM4|7171|P67936|tropomyosin alpha-4 chain isoform 1 [Homo sapiens]	418@C190,418@C36
NP_055140.1|	160	1	21.097	202	CORO1C	coronin, actin binding protein, 1C	12q24.1	WDR	5	8	13	|CORO1C|23603|Q9ULV4|coronin-1C isoform 1 [Homo sapiens]	418@C456,418@C330,418@C343,418@C420
NP_056988.3|	612	1	3.44262	758	EIF5B	eukaryotic translation initiation factor 5B	2q11.2		5	7	13	|EIF5B|9669|O60841;Q8N5A0|eukaryotic translation initiation factor 5B [Homo sapiens]	418@C635,418@C749,418@C1092,418@C1158
NP_004651.2|,NP_001116137.1|	707	2	12.8788	885	DDX3Y	DEAD (Asp-Glu-Ala-Asp) box helicase 3, Y-linked	Yq11	DDX	5	6	13	|DDX3Y|8653|O15523|ATP-dependent RNA helicase DDX3Y [Homo sapiens]	418@C296,418@C315,418@C221,418@C339
NP_004651.2|			12.8788		DDX3Y	DEAD (Asp-Glu-Ala-Asp) box helicase 3, Y-linked	Yq11	DDX				|DDX3Y|8653|O15523|ATP-dependent RNA helicase DDX3Y [Homo sapiens]	418@C221,418@C296,418@C315,418@C339
NP_001116137.1|			12.8788		DDX3Y	DEAD (Asp-Glu-Ala-Asp) box helicase 3, Y-linked	Yq11	DDX				|DDX3Y|8653|O15523|ATP-dependent RNA helicase DDX3Y [Homo sapiens]	418@C221,418@C296,418@C315,418@C339
NP_001180345.1|,NP_001347.3|	707	2	14.966	886	DDX3X	DEAD (Asp-Glu-Ala-Asp) box helicase 3, X-linked	Xp11.3-p11.23	DDX	5	6	13	|DDX3X|1654|O00571|ATP-dependent RNA helicase DDX3X isoform 1 [Homo sapiens]	418@C298,418@C317,418@C223,418@C341
NP_001180345.1|			14.9773		DDX3X	DEAD (Asp-Glu-Ala-Asp) box helicase 3, X-linked	Xp11.3-p11.23	DDX				|DDX3X|1654|-|ATP-dependent RNA helicase DDX3X isoform 2 [Homo sapiens]	418@C223,418@C298,418@C317,418@C341
NP_001347.3|			14.9547		DDX3X	DEAD (Asp-Glu-Ala-Asp) box helicase 3, X-linked	Xp11.3-p11.23	DDX				|DDX3X|1654|O00571|ATP-dependent RNA helicase DDX3X isoform 1 [Homo sapiens]	418@C223,418@C298,418@C317,418@C341
NP_001672.1|	34	1	5.91775	966	ATP2A2	ATPase, Ca++ transporting, cardiac muscle, slow twitch 2	12q24.11	PATP	5	7	13	|ATP2A2|488|P16615|sarcoplasmic/endoplasmic reticulum calcium ATPase 2 isoform a [Homo sapiens]	418@C498,418@C524,418@C447,418@C471,418@C635
NP_001180346.1|	707	1	14.2415	1099	DDX3X	DEAD (Asp-Glu-Ala-Asp) box helicase 3, X-linked	Xp11.3-p11.23	DDX	5	6	13	|DDX3X|1654|O00571|ATP-dependent RNA helicase DDX3X isoform 3 [Homo sapiens]	418@C282,418@C301,418@C207,418@C325
NP_001193496.1|,NP_005522.2|	770	2	5.76132	976	IFI16	interferon, gamma-inducible protein 16	1q22		4	7	13	|IFI16|3428|Q16666|gamma-interferon-inducible protein 16 isoform 2 [Homo sapiens]	418@C671,418@C135,418@C191,418@C581,418@C681
NP_001193496.1|			5.76132		IFI16	interferon, gamma-inducible protein 16	1q22					|IFI16|3428|Q16666;B4DJT8;H3BLV7|gamma-interferon-inducible protein 16 isoform 1 [Homo sapiens]	418@C135,418@C581,418@C671,418@C681
NP_005522.2|			5.76132		IFI16	interferon, gamma-inducible protein 16	1q22					|IFI16|3428|Q16666|gamma-interferon-inducible protein 16 isoform 2 [Homo sapiens]	418@C191,418@C581,418@C671,418@C681
NP_001093.1|,NP_001123476.1|,NP_001123477.1|	296	3	14.7073	363	ACTN1	actinin, alpha 1	14q24.1	EFHAND	5	7	12	|ACTN1|87|P12814|alpha-actinin-1 isoform c [Homo sapiens]	418@C370,418@C332,418@C263,418@C180,418@C154
NP_001093.1|			14.7982		ACTN1	actinin, alpha 1	14q24.1	EFHAND				|ACTN1|87|P12814|alpha-actinin-1 isoform b [Homo sapiens]	418@C154,418@C180,418@C263,418@C332,418@C370
NP_001123476.1|			14.442		ACTN1	actinin, alpha 1	14q24.1	EFHAND				|ACTN1|87|P12814|alpha-actinin-1 isoform a [Homo sapiens]	418@C154,418@C180,418@C263,418@C332,418@C370
NP_001123477.1|			14.8816		ACTN1	actinin, alpha 1	14q24.1	EFHAND				|ACTN1|87|P12814|alpha-actinin-1 isoform c [Homo sapiens]	418@C154,418@C180,418@C263,418@C332,418@C370
NP_001826.3|,NP_009029.3|	485	2	2.48294	595	CLTCL1	clathrin, heavy chain-like 1	22q11.2		4	6	12	|CLTCL1|8218|P53675|clathrin heavy chain 2 isoform 1 [Homo sapiens]	418@C918,418@C617,418@C736
NP_001826.3|			2.52685		CLTCL1	clathrin, heavy chain-like 1	22q11.2					|CLTCL1|8218|P53675|clathrin heavy chain 2 isoform 2 [Homo sapiens]	418@C617,418@C736,418@C918
NP_009029.3|			2.43902		CLTCL1	clathrin, heavy chain-like 1	22q11.2					|CLTCL1|8218|P53675|clathrin heavy chain 2 isoform 1 [Homo sapiens]	418@C617,418@C736,418@C918
NP_001006.1|	322	1	50	396	RPS11	ribosomal protein S11	19q13.3	RPS	3	5	12	|RPS11|6205|P62280|40S ribosomal protein S11 [Homo sapiens]	418@C60,418@C116,418@C131
NP_116093.1|	753	1	41.4254	1113	TUBA1C	tubulin, alpha 1c	12q13.12	TUB	3	6	12	|TUBA1C|84790|Q9BQE3|tubulin alpha-1C chain [Homo sapiens]	418@C295,418@C376,418@C316,418@C315
NP_001015.1|	363	1	19.2771	452	RPS21	ribosomal protein S21	20q13.3	RPS	2	3	12	|RPS21|6227|P63220;Q6FGH5|40S ribosomal protein S21 [Homo sapiens]	418@C56,418@C17
NP_003303.2|,NP_001257412.1|	661	2	4.3771	825	TST	thiosulfate sulfurtransferase (rhodanese)	22q13.1		2	5	12	|TST|7263|-|thiosulfate sulfurtransferase [Homo sapiens]	418@C248
NP_003303.2|			4.3771		TST	thiosulfate sulfurtransferase (rhodanese)	22q13.1					|TST|7263|Q16762|thiosulfate sulfurtransferase [Homo sapiens]	418@C248
NP_001257412.1|			4.3771		TST	thiosulfate sulfurtransferase (rhodanese)	22q13.1					|TST|7263|-|thiosulfate sulfurtransferase [Homo sapiens]	418@C248
NP_002125.3|,NP_001120677.1|,NP_001120678.1|,NP_001120676.1|	694	4	6.96203	869	HMOX2	heme oxygenase (decycling) 2	16p13.3		2	4	12	|HMOX2|3163|P30519|heme oxygenase 2 [Homo sapiens]	418@C265,418@C282
NP_002125.3|			6.96203		HMOX2	heme oxygenase (decycling) 2	16p13.3					|HMOX2|3163|P30519|heme oxygenase 2 [Homo sapiens]	418@C265,418@C282
NP_001120677.1|			6.96203		HMOX2	heme oxygenase (decycling) 2	16p13.3					|HMOX2|3163|P30519|heme oxygenase 2 [Homo sapiens]	418@C265,418@C282
NP_001120678.1|			6.96203		HMOX2	heme oxygenase (decycling) 2	16p13.3					|HMOX2|3163|P30519|heme oxygenase 2 [Homo sapiens]	418@C265,418@C282
NP_001120676.1|			6.96203		HMOX2	heme oxygenase (decycling) 2	16p13.3					|HMOX2|3163|P30519|heme oxygenase 2 [Homo sapiens]	418@C265,418@C282
NP_000099.2|	855	1	7.46562	1112	DLD	dihydrolipoamide dehydrogenase	7q31-q32		2	4	12	|DLD|1738|P09622|dihydrolipoyl dehydrogenase, mitochondrial precursor [Homo sapiens]	418@C484,418@C85
NP_525125.2|,NP_005992.1|	753	2	32.8889	1116	TUBA3C	tubulin, alpha 3c	13q12.11	TUB	2	4	12	|TUBA3C|7278|Q13748;Q1ZYQ1|tubulin alpha-3C/D chain [Homo sapiens]	418@C295,418@C376
NP_525125.2|			32.8889		TUBA3D	tubulin, alpha 3d	2q21.1	TUB				|TUBA3D|113457|Q13748;Q1ZYQ1|tubulin alpha-3C/D chain [Homo sapiens]	418@C295,418@C376
NP_005992.1|			32.8889		TUBA3C	tubulin, alpha 3c	13q12.11	TUB				|TUBA3C|7278|Q13748;Q1ZYQ1|tubulin alpha-3C/D chain [Homo sapiens]	418@C295,418@C376
NP_997195.1|	753	1	30.8889	1117	TUBA3E	tubulin, alpha 3e	2q21.1	TUB	2	4	12	|TUBA3E|112714|Q6PEY2|tubulin alpha-3E chain [Homo sapiens]	418@C295,418@C376
NP_004125.3|	408	1	25.1841	504	HSPA9	heat shock 70kDa protein 9 (mortalin)	5q31.1	HSP70	6	7	11	|HSPA9|3313|P38646|stress-70 protein, mitochondrial precursor [Homo sapiens]	418@C608,418@C66,418@C366,418@C487
NP_001153706.1|,NP_001153705.1|,NP_000692.2|	405	3	5.82743	541	ATP1A1	ATPase, Na+/K+ transporting, alpha 1 polypeptide	1p13	PATP	5	6	11	|ATP1A1|476|P05023|sodium/potassium-transporting ATPase subunit alpha-1 isoform a [Homo sapiens]	418@C218,418@C249,418@C575,418@C606,418@C674,418@C705,418@C397,418@C428,418@C632,418@C663
NP_001153706.1|			5.94758		ATP1A1	ATPase, Na+/K+ transporting, alpha 1 polypeptide	1p13	PATP				|ATP1A1|476|P05023;B7Z3U6|sodium/potassium-transporting ATPase subunit alpha-1 isoform d [Homo sapiens]	418@C218,418@C397,418@C575,418@C632,418@C674
NP_001153705.1|			5.76735		ATP1A1	ATPase, Na+/K+ transporting, alpha 1 polypeptide	1p13	PATP				|ATP1A1|476|P05023;B7Z2T5;F5H3A1|sodium/potassium-transporting ATPase subunit alpha-1 isoform c [Homo sapiens]	418@C249,418@C428,418@C606,418@C663,418@C705
NP_000692.2|			5.76735		ATP1A1	ATPase, Na+/K+ transporting, alpha 1 polypeptide	1p13	PATP				|ATP1A1|476|P05023|sodium/potassium-transporting ATPase subunit alpha-1 isoform a [Homo sapiens]	418@C249,418@C428,418@C606,418@C663,418@C705
NP_005989.3|	538	1	19.4495	665	CCT3	chaperonin containing TCP1, subunit 3 (gamma)	1q23	CHAP	5	6	11	|CCT3|7203|P49368;B3KX11;Q59H77|T-complex protein 1 subunit gamma isoform a [Homo sapiens]	418@C455,418@C173,418@C398,418@C40,418@C213
NP_001230106.1|,NP_000025.1|,NP_908930.1|,NP_908932.1|,NP_001121089.1|	713	5	57.2722	959	ALDOA	aldolase A, fructose-bisphosphate	16p11.2		5	8	11	|ALDOA|226|P04075|fructose-bisphosphate aldolase A isoform 1 [Homo sapiens]	418@C232,418@C178,418@C127,418@C73,418@C393,418@C339,418@C256,418@C202
NP_001230106.1|			51.1962		ALDOA	aldolase A, fructose-bisphosphate	16p11.2					|ALDOA|226|P04075|fructose-bisphosphate aldolase A isoform 2 [Homo sapiens]	418@C127,418@C232,418@C256,418@C393
NP_000025.1|			58.7912		ALDOA	aldolase A, fructose-bisphosphate	16p11.2					|ALDOA|226|P04075|fructose-bisphosphate aldolase A isoform 1 [Homo sapiens]	418@C73,418@C178,418@C202,418@C339
NP_908930.1|			58.7912		ALDOA	aldolase A, fructose-bisphosphate	16p11.2					|ALDOA|226|P04075|fructose-bisphosphate aldolase A isoform 1 [Homo sapiens]	418@C73,418@C178,418@C202,418@C339
NP_908932.1|			58.7912		ALDOA	aldolase A, fructose-bisphosphate	16p11.2					|ALDOA|226|P04075|fructose-bisphosphate aldolase A isoform 1 [Homo sapiens]	418@C73,418@C178,418@C202,418@C339
NP_001121089.1|			58.7912		ALDOA	aldolase A, fructose-bisphosphate	16p11.2					|ALDOA|226|P04075|fructose-bisphosphate aldolase A isoform 1 [Homo sapiens]	418@C73,418@C178,418@C202,418@C339
NP_001003810.1|,NP_002129.2|,NP_112738.1|,NP_112737.1|	813	4	16.309	1047	HNRNPD	heterogeneous nuclear ribonucleoprotein D (AU-rich element RNA binding protein 1, 37kDa)	4q21	RBM	5	5	11	|HNRNPD|3184|Q14103|heterogeneous nuclear ribonucleoprotein D0 isoform b [Homo sapiens]	418@C207,418@C226,418@C233,418@C252,418@C107,418@C126
NP_001003810.1|			18.1185		HNRNPD	heterogeneous nuclear ribonucleoprotein D (AU-rich element RNA binding protein 1, 37kDa)	4q21	RBM				|HNRNPD|3184|Q14103|heterogeneous nuclear ribonucleoprotein D0 isoform d [Homo sapiens]	418@C107,418@C207,418@C233
NP_002129.2|			16.9935		HNRNPD	heterogeneous nuclear ribonucleoprotein D (AU-rich element RNA binding protein 1, 37kDa)	4q21	RBM				|HNRNPD|3184|Q14103|heterogeneous nuclear ribonucleoprotein D0 isoform c [Homo sapiens]	418@C126,418@C226,418@C252
NP_112738.1|			14.6479		HNRNPD	heterogeneous nuclear ribonucleoprotein D (AU-rich element RNA binding protein 1, 37kDa)	4q21	RBM				|HNRNPD|3184|Q14103|heterogeneous nuclear ribonucleoprotein D0 isoform a [Homo sapiens]	418@C126,418@C226,418@C252
NP_112737.1|			15.4762		HNRNPD	heterogeneous nuclear ribonucleoprotein D (AU-rich element RNA binding protein 1, 37kDa)	4q21	RBM				|HNRNPD|3184|Q14103|heterogeneous nuclear ribonucleoprotein D0 isoform b [Homo sapiens]	418@C107,418@C207,418@C233
NP_004915.2|	296	1	14.5993	360	ACTN4	actinin, alpha 4	19q13	EFHAND	4	6	11	|ACTN4|81|O43707|alpha-actinin-4 [Homo sapiens]	418@C351,418@C499,418@C282,418@C173
NP_001014.1|,NP_001139699.1|	591	2	20.8516	732	RPS20	ribosomal protein S20	8q12.1	RPS	3	4	11	|RPS20|6224|P60866|40S ribosomal protein S20 isoform 1 [Homo sapiens]	418@C70,418@C36
NP_001014.1|			22.6891		RPS20	ribosomal protein S20	8q12.1	RPS				|RPS20|6224|P60866|40S ribosomal protein S20 isoform 2 [Homo sapiens]	418@C36,418@C70
NP_001139699.1|			19.0141		RPS20	ribosomal protein S20	8q12.1	RPS				|RPS20|6224|P60866|40S ribosomal protein S20 isoform 1 [Homo sapiens]	418@C36,418@C70
NP_001153239.1|,NP_054757.1|	851	2	7.63723	1104	BZW2	basic leucine zipper and W2 domains 2	7p21.3		3	5	11	|BZW2|28969|Q9Y6E2|basic leucine zipper and W2 domain-containing protein 2 [Homo sapiens]	418@C97,418@C270
NP_001153239.1|			7.63723		BZW2	basic leucine zipper and W2 domains 2	7p21.3					|BZW2|28969|Q9Y6E2|basic leucine zipper and W2 domain-containing protein 2 [Homo sapiens]	418@C97,418@C270
NP_054757.1|			7.63723		BZW2	basic leucine zipper and W2 domains 2	7p21.3					|BZW2|28969|Q9Y6E2|basic leucine zipper and W2 domain-containing protein 2 [Homo sapiens]	418@C97,418@C270
NP_000652.2|,NP_001020092.1|	270	2	31.25	333	RPL9	ribosomal protein L9	4p13	RPL	2	5	11	|RPL9|6133|P32969;Q53Z07|60S ribosomal protein L9 [Homo sapiens]	418@C134,418@C74
NP_000652.2|			31.25		RPL9	ribosomal protein L9	4p13	RPL				|RPL9|6133|P32969;Q53Z07|60S ribosomal protein L9 [Homo sapiens]	418@C74,418@C134
NP_001020092.1|			31.25		RPL9	ribosomal protein L9	4p13	RPL				|RPL9|6133|P32969;Q53Z07|60S ribosomal protein L9 [Homo sapiens]	418@C74,418@C134
NP_000959.2|	651	1	29.274	811	RPL4	ribosomal protein L4	15q22	RPL	2	4	11	|RPL4|6124|P36578|60S ribosomal protein L4 [Homo sapiens]	418@C208,418@C96
NP_006810.1|	725	1	25.5985	915	STIP1	stress-induced phosphoprotein 1	11q13	TTC	6	7	10	|STIP1|10963|P31948|stress-induced-phosphoprotein 1 [Homo sapiens]	418@C26,418@C370,418@C278,418@C403,418@C62,418@C339
NP_001348.2|	451	1	6.92913	554	DHX9	DEAH (Asp-Glu-Ala-His) box helicase 9	1q25	DHX	4	5	10	|DHX9|1660|Q08211;B3KU66|ATP-dependent RNA helicase A [Homo sapiens]	418@C1029,418@C242,418@C469,418@C1099
NP_001017963.2|,NP_005339.3|	34	2	42.3692	625	HSP90AA1	heat shock protein 90kDa alpha (cytosolic), class A member 1	14q32.33	HSPC	4	5	10	|HSP90AA1|3320|P07900|heat shock protein HSP 90-alpha isoform 2 [Homo sapiens]	418@C542,418@C420,418@C694,418@C572
NP_001017963.2|			39.1101		HSP90AA1	heat shock protein 90kDa alpha (cytosolic), class A member 1	14q32.33	HSPC				|HSP90AA1|3320|P07900;Q86SX1|heat shock protein HSP 90-alpha isoform 1 [Homo sapiens]	418@C542,418@C694
NP_005339.3|			45.6284		HSP90AA1	heat shock protein 90kDa alpha (cytosolic), class A member 1	14q32.33	HSPC				|HSP90AA1|3320|P07900|heat shock protein HSP 90-alpha isoform 2 [Homo sapiens]	418@C420,418@C572
NP_031381.2|	34	1	54.0055	626	HSP90AB1	heat shock protein 90kDa alpha (cytosolic), class B member 1	6p12	HSPC	4	5	10	|HSP90AB1|3326|P08238|heat shock protein HSP 90-beta [Homo sapiens]	418@C412,418@C564
NP_001185771.1|,NP_006422.1|	422	2	20.1794	521	CCT2	chaperonin containing TCP1, subunit 2 (beta)	12q14	CHAP	3	4	10	|CCT2|10576|P78371|T-complex protein 1 subunit beta isoform 1 [Homo sapiens]	418@C365,418@C412,418@C348,418@C395,418@C488,418@C535
NP_001185771.1|			21.1066		CCT2	chaperonin containing TCP1, subunit 2 (beta)	12q14	CHAP				|CCT2|10576|P78371|T-complex protein 1 subunit beta isoform 2 [Homo sapiens]	418@C348,418@C365,418@C488
NP_006422.1|			19.2523		CCT2	chaperonin containing TCP1, subunit 2 (beta)	12q14	CHAP				|CCT2|10576|P78371|T-complex protein 1 subunit beta isoform 1 [Homo sapiens]	418@C395,418@C412,418@C535
NP_005795.2|	92	1	8.8993	913	DDX39A	DEAD (Asp-Glu-Ala-Asp) box polypeptide 39A	19p13.12	DDX	3	4	10	|DDX39A|10212|O00148|ATP-dependent RNA helicase DDX39A [Homo sapiens]	418@C164,418@C238
NP_006588.1|	408	1	43.1889	981	HSPA8	heat shock 70kDa protein 8	11q24.1	HSP70	3	4	10	|HSPA8|3312|P11142;Q53HF2|heat shock cognate 71 kDa protein isoform 1 [Homo sapiens]	418@C603,418@C574
NP_003281.1|	126	1	20.5645	161	TPM4	tropomyosin 4	19p13.1	TPM	2	4	10	|TPM4|7171|P67936|tropomyosin alpha-4 chain isoform 2 [Homo sapiens]	418@C154
NP_008839.2|,NP_061485.1|,NP_005043.1|	180	3	5.052	224	RAC3	ras-related C3 botulinum toxin substrate 3 (rho family, small GTP binding protein Rac3)	17q25.3	ENDOLIG	2	3	10	|RAC3|5881|P60763|ras-related C3 botulinum toxin substrate 3 [Homo sapiens]	418@C178,418@C197
NP_008839.2|			5.20833		RAC1	ras-related C3 botulinum toxin substrate 1 (rho family, small GTP binding protein Rac1)	7p22	ENDOLIG				|RAC1|5879|P63000;A4D2P1|ras-related C3 botulinum toxin substrate 1 isoform Rac1 [Homo sapiens]	418@C178
NP_061485.1|			4.73934		RAC1	ras-related C3 botulinum toxin substrate 1 (rho family, small GTP binding protein Rac1)	7p22	ENDOLIG				|RAC1|5879|P63000;A4D2P0|ras-related C3 botulinum toxin substrate 1 isoform Rac1b [Homo sapiens]	418@C197
NP_005043.1|			5.20833		RAC3	ras-related C3 botulinum toxin substrate 3 (rho family, small GTP binding protein Rac3)	17q25.3	ENDOLIG				|RAC3|5881|P60763|ras-related C3 botulinum toxin substrate 3 [Homo sapiens]	418@C178
NP_002296.1|	373	1	37.7778	463	LGALS1	lectin, galactoside-binding, soluble, 1	22q13.1	ENDOLIG	2	4	10	|LGALS1|3956|P09382|galectin-1 [Homo sapiens]	418@C61,418@C43
NP_005013.1|	723	1	70.7143	912	PFN1	profilin 1	17p13.2		2	4	10	|PFN1|5216|P07737;Q53Y44|profilin-1 [Homo sapiens]	418@C71,418@C128
NP_078934.3|	843	1	0.925069	1085	IPO4	importin 4	14q11.2	IPO	1	2	10	|IPO4|79711|Q8TEX9;B3KT38|importin-4 [Homo sapiens]	418@C708
NP_006280.3|	189	1	3.73869	233	TLN1	talin 1	9p23-p21		5	6	9	|TLN1|7094|Q9Y490|talin-1 [Homo sapiens]	418@C1087,418@C956,418@C1671,418@C2196,418@C2442
NP_005909.2|	248	1	32.2485	307	MDH2	malate dehydrogenase 2, NAD (mitochondrial)	7q11.23		4	5	9	|MDH2|4191|P40926|malate dehydrogenase, mitochondrial precursor [Homo sapiens]	418@C285,418@C212,418@C275,418@C89
NP_000693.1|	405	1	3.62745	499	ATP1A2	ATPase, Na+/K+ transporting, alpha 2 polypeptide	1q23.2	PATP	4	5	9	|ATP1A2|477|P50993|sodium/potassium-transporting ATPase subunit alpha-2 proprotein [Homo sapiens]	418@C603,418@C702,418@C426,418@C660
NP_003277.1|	427	1	9.15033	528	TOP1	topoisomerase (DNA) I	20q12-q13.1		4	5	9	|TOP1|7150|P11387|DNA topoisomerase 1 [Homo sapiens]	418@C630,418@C341,418@C733,418@C386
NP_001242941.1|,NP_005955.3|,NP_001243024.1|	533	3	2.46324	657	MYH10	myosin, heavy chain 10, non-muscle	17p13	MYHII	4	5	9	|MYH10|4628|B2RWP9;Q4LE45|myosin-10 isoform 3 [Homo sapiens]	418@C95,418@C586,418@C576,418@C585,418@C709,418@C678,418@C687
NP_001242941.1|			2.44145		MYH10	myosin, heavy chain 10, non-muscle	17p13	MYHII				|MYH10|4628|P35580;F8VTL3;G1UI33;Q4LE45;Q9BWG0|myosin-10 isoform 1 [Homo sapiens]	418@C95,418@C586,418@C709
NP_005955.3|			2.47976		MYH10	myosin, heavy chain 10, non-muscle	17p13	MYHII				|MYH10|4628|P35580;B2RWP9;Q9BWG0|myosin-10 isoform 2 [Homo sapiens]	418@C95,418@C576,418@C678
NP_001243024.1|			2.46851		MYH10	myosin, heavy chain 10, non-muscle	17p13	MYHII				|MYH10|4628|B2RWP9;Q4LE45|myosin-10 isoform 3 [Homo sapiens]	418@C95,418@C585,418@C687
NP_057535.1|,NP_001137533.1|,NP_001137534.1|	535	3	4.51207	660	COPB1	coatomer protein complex, subunit beta 1	11p15.2		4	5	9	|COPB1|1315|P53618|coatomer subunit beta [Homo sapiens]	418@C635,418@C877,418@C390,418@C143
NP_057535.1|			4.51207		COPB1	coatomer protein complex, subunit beta 1	11p15.2					|COPB1|1315|P53618|coatomer subunit beta [Homo sapiens]	418@C143,418@C390,418@C635,418@C877
NP_001137533.1|			4.51207		COPB1	coatomer protein complex, subunit beta 1	11p15.2					|COPB1|1315|P53618|coatomer subunit beta [Homo sapiens]	418@C143,418@C390,418@C635,418@C877
NP_001137534.1|			4.51207		COPB1	coatomer protein complex, subunit beta 1	11p15.2					|COPB1|1315|P53618|coatomer subunit beta [Homo sapiens]	418@C143,418@C390,418@C635,418@C877
NP_001092090.1|,NP_114366.1|,NP_001122384.1|,NP_001122386.1|	588	4	24.5665	728	PCBP2	poly(rC) binding protein 2	12q13.13		4	5	9	|PCBP2|5094|Q15366;G3V0E8|poly(rC)-binding protein 2 isoform g [Homo sapiens]	418@C109,418@C163,418@C158,418@C54
NP_001092090.1|			25.3776		PCBP2	poly(rC) binding protein 2	12q13.13					|PCBP2|5094|Q15366|poly(rC)-binding protein 2 isoform c [Homo sapiens]	418@C54,418@C109,418@C158,418@C163
NP_114366.1|			23.2044		PCBP2	poly(rC) binding protein 2	12q13.13					|PCBP2|5094|Q15366|poly(rC)-binding protein 2 isoform b [Homo sapiens]	418@C54,418@C109,418@C158,418@C163
NP_001122384.1|			23.2687		PCBP2	poly(rC) binding protein 2	12q13.13					|PCBP2|5094|Q15366;Q59HD4|poly(rC)-binding protein 2 isoform e [Homo sapiens]	418@C54,418@C109,418@C158,418@C163
NP_001122386.1|			26.4151		PCBP2	poly(rC) binding protein 2	12q13.13					|PCBP2|5094|Q15366;G3V0E8|poly(rC)-binding protein 2 isoform g [Homo sapiens]	418@C54,418@C109,418@C158,418@C163
NP_001008800.1|	538	1	17.7515	918	CCT3	chaperonin containing TCP1, subunit 3 (gamma)	1q23	CHAP	4	5	9	|CCT3|7203|P49368;B3KX11|T-complex protein 1 subunit gamma isoform c [Homo sapiens]	418@C417,418@C135,418@C360,418@C175
NP_000966.2|,NP_001186731.1|	798	2	30.4228	1016	RPL11	ribosomal protein L11	1p36.1-p35	RPL	4	5	9	|RPL11|6135|P62913|60S ribosomal protein L11 isoform 2 [Homo sapiens]	418@C21,418@C20,418@C72,418@C71,418@C150,418@C149
NP_000966.2|			30.3371		RPL11	ribosomal protein L11	1p36.1-p35	RPL				|RPL11|6135|P62913;Q5VVD0|60S ribosomal protein L11 isoform 1 [Homo sapiens]	418@C21,418@C72,418@C150
NP_001186731.1|			30.5085		RPL11	ribosomal protein L11	1p36.1-p35	RPL				|RPL11|6135|P62913|60S ribosomal protein L11 isoform 2 [Homo sapiens]	418@C20,418@C71,418@C149
NP_001094.1|	296	1	6.82327	362	ACTN2	actinin, alpha 2	1q42-q43	EFHAND	3	5	9	|ACTN2|88|P35609|alpha-actinin-2 [Homo sapiens]	418@C339,418@C270,418@C161
NP_002215.2|	596	1	1.38525	737	ITPR3	inositol 1,4,5-trisphosphate receptor, type 3	6p21.31	ITPR	3	4	9	|ITPR3|3710|Q14573;A6H8K3;Q59ES2|inositol 1,4,5-trisphosphate receptor type 3 [Homo sapiens]	418@C1511,418@C1881,418@C1236
NP_006592.3|	630	1	23.125	785	PTGES3	prostaglandin E synthase 3 (cytosolic)	12q13.13		3	7	9	|PTGES3|10728|Q15185|prostaglandin E synthase 3 [Homo sapiens]	418@C40,418@C58,418@C75,418@C76
NP_036313.3|	797	1	8.47458	1013	FKBP8	FK506 binding protein 8, 38kDa	19p12	TTC	3	4	9	|FKBP8|23770|Q14318|peptidyl-prolyl cis-trans isomerase FKBP8 [Homo sapiens]	418@C296,418@C275,418@C379
NP_004588.1|,NP_808210.2|	30	2	17.7338	34	SNRPD2	small nuclear ribonucleoprotein D2 polypeptide 16.5kDa	19q13.2-q13.3		2	4	9	|SNRPD2|6633|P62316|small nuclear ribonucleoprotein Sm D2 isoform 2 [Homo sapiens]	418@C46,418@C36,418@C63,418@C53
NP_004588.1|			16.9492		SNRPD2	small nuclear ribonucleoprotein D2 polypeptide 16.5kDa	19q13.2-q13.3					|SNRPD2|6633|P62316|small nuclear ribonucleoprotein Sm D2 isoform 1 [Homo sapiens]	418@C46,418@C63
NP_808210.2|			18.5185		SNRPD2	small nuclear ribonucleoprotein D2 polypeptide 16.5kDa	19q13.2-q13.3					|SNRPD2|6633|P62316|small nuclear ribonucleoprotein Sm D2 isoform 2 [Homo sapiens]	418@C36,418@C53
NP_001010.2|,NP_001025180.1|	168	2	31.5385	210	RPS15A	ribosomal protein S15a	16p12.3	RPS	2	4	9	|RPS15A|6210|P62244;B2R4W8|40S ribosomal protein S15a [Homo sapiens]	418@C72,418@C30
NP_001010.2|			31.5385		RPS15A	ribosomal protein S15a	16p12.3	RPS				|RPS15A|6210|P62244;B2R4W8|40S ribosomal protein S15a [Homo sapiens]	418@C30,418@C72
NP_001025180.1|			31.5385		RPS15A	ribosomal protein S15a	16p12.3	RPS				|RPS15A|6210|P62244;B2R4W8|40S ribosomal protein S15a [Homo sapiens]	418@C30,418@C72
NP_665735.1|,NP_064696.1|,NP_665734.1|,NP_665707.1|,NP_001247440.1|,NP_001247441.1|,NP_001254527.1|	483	7	10.6373	591	MGST1	microsomal glutathione S-transferase 1	12p12.3-p12.1	MGST	2	4	9	|MGST1|4257|-|microsomal glutathione S-transferase 1 isoform c [Homo sapiens]	418@C50
NP_665735.1|			9.03226		MGST1	microsomal glutathione S-transferase 1	12p12.3-p12.1	MGST				|MGST1|4257|P10620|microsomal glutathione S-transferase 1 isoform a [Homo sapiens]	418@C50
NP_064696.1|			9.03226		MGST1	microsomal glutathione S-transferase 1	12p12.3-p12.1	MGST				|MGST1|4257|P10620|microsomal glutathione S-transferase 1 isoform a [Homo sapiens]	418@C50
NP_665734.1|			9.03226		MGST1	microsomal glutathione S-transferase 1	12p12.3-p12.1	MGST				|MGST1|4257|P10620|microsomal glutathione S-transferase 1 isoform a [Homo sapiens]	418@C50
NP_665707.1|			9.03226		MGST1	microsomal glutathione S-transferase 1	12p12.3-p12.1	MGST				|MGST1|4257|P10620|microsomal glutathione S-transferase 1 isoform a [Homo sapiens]	418@C50
NP_001247440.1|			9.03226		MGST1	microsomal glutathione S-transferase 1	12p12.3-p12.1	MGST				|MGST1|4257|P10620|microsomal glutathione S-transferase 1 isoform a [Homo sapiens]	418@C50
NP_001247441.1|			13.2075		MGST1	microsomal glutathione S-transferase 1	12p12.3-p12.1	MGST				|MGST1|4257|-|microsomal glutathione S-transferase 1 isoform b [Homo sapiens]	418@C50
NP_001254527.1|			16.092		MGST1	microsomal glutathione S-transferase 1	12p12.3-p12.1	MGST				|MGST1|4257|-|microsomal glutathione S-transferase 1 isoform c [Homo sapiens]	418@C50
NP_002873.1|	563	1	18.408	696	RANBP1	RAN binding protein 1	22q11.21		2	4	9	|RANBP1|5902|P43487|ran-specific GTPase-activating protein [Homo sapiens]	418@C99,418@C158
NP_001184110.1|	702	1	21.164	879	TUBB3	tubulin, beta 3 class III	16q24.3	TUB	1	3	9	|TUBB3|10381|Q13509;A8K854|tubulin beta-3 chain isoform 2 [Homo sapiens]	418@C231
NP_002403.2|	755	1	5.04202	955	MGMT	O-6-methylguanine-DNA methyltransferase	10q26		1	2	9	|MGMT|4255|B4DEE8|methylated-DNA--protein-cysteine methyltransferase [Homo sapiens]	418@C176
NP_817124.1|	702	1	11.9369	1086	TUBB8	tubulin, beta 8 class VIII	10p15.3	TUB	1	3	9	|TUBB8|347688|Q3ZCM7|tubulin beta-8 chain isoform 1 [Homo sapiens]	418@C303
NP_115914.1|	702	1	9.64126	1106	TUBB6	tubulin, beta 6 class V	18p11.21	TUB	1	3	9	|TUBB6|84617|Q9BUF5|tubulin beta-6 chain [Homo sapiens]	418@C303
NP_055791.1|	68	1	2.83271	80	PDCD11	programmed cell death 11	10q24.32		5	6	8	|PDCD11|22984|Q14690|protein RRP5 homolog [Homo sapiens]	418@C1218,418@C1154,418@C330,418@C505,418@C557
NP_006089.1|	143	1	26.183	183	GNB2L1	guanine nucleotide binding protein (G protein), beta polypeptide 2-like 1	5q35.3	WDR	5	5	8	|GNB2L1|10399|P63244;E9KL35|guanine nucleotide-binding protein subunit beta-2-like 1 [Homo sapiens]	418@C207,418@C249,418@C168,418@C138,418@C182
NP_001073027.1|	292	1	11.9143	356	HNRNPUL2	heterogeneous nuclear ribonucleoprotein U-like 2	11q12		5	6	8	|HNRNPUL2|221092|Q1KMD3|heterogeneous nuclear ribonucleoprotein U-like protein 2 [Homo sapiens]	418@C602,418@C538,418@C293,418@C518,418@C405
NP_573566.2|	159	1	3.44333	201	LRPPRC	leucine-rich pentatricopeptide repeat containing	2p21		4	5	8	|LRPPRC|10128|P42704;E5KNY5|leucine-rich PPR motif-containing protein, mitochondrial precursor [Homo sapiens]	418@C863,418@C130,418@C571,418@C113
NP_006576.2|	557	1	20.438	689	CCT8	chaperonin containing TCP1, subunit 8 (theta)	21q21.3	CHAP	4	6	8	|CCT8|10694|P50990|T-complex protein 1 subunit theta [Homo sapiens]	418@C244,418@C430,418@C148,418@C149,418@C36
NP_001230587.1|,NP_001230588.1|,NP_002055.1|,NP_001112362.1|	559	4	47.1698	692	GLRX	glutaredoxin (thioltransferase)	5q14		4	6	8	|GLRX|2745|P35754|glutaredoxin-1 [Homo sapiens]	418@C79,418@C26,418@C83
NP_001230587.1|			47.1698		GLRX	glutaredoxin (thioltransferase)	5q14					|GLRX|2745|P35754|glutaredoxin-1 [Homo sapiens]	418@C26,418@C79,418@C83
NP_001230588.1|			47.1698		GLRX	glutaredoxin (thioltransferase)	5q14					|GLRX|2745|P35754|glutaredoxin-1 [Homo sapiens]	418@C26,418@C79,418@C83
NP_002055.1|			47.1698		GLRX	glutaredoxin (thioltransferase)	5q14					|GLRX|2745|P35754|glutaredoxin-1 [Homo sapiens]	418@C26,418@C79,418@C83
NP_001112362.1|			47.1698		GLRX	glutaredoxin (thioltransferase)	5q14					|GLRX|2745|P35754|glutaredoxin-1 [Homo sapiens]	418@C26,418@C79,418@C83
NP_005511.1|,NP_001244222.1|	460	2	20.49	754	HNRNPH1	heterogeneous nuclear ribonucleoprotein H1 (H)	5q35.3	RBM	4	5	8	|HNRNPH1|3187|P31943|heterogeneous nuclear ribonucleoprotein H [Homo sapiens]	418@C290,418@C267,418@C34,418@C22
NP_005511.1|			20.49		HNRNPH1	heterogeneous nuclear ribonucleoprotein H1 (H)	5q35.3	RBM				|HNRNPH1|3187|P31943|heterogeneous nuclear ribonucleoprotein H [Homo sapiens]	418@C22,418@C34,418@C267,418@C290
NP_001244222.1|			20.49		HNRNPH1	heterogeneous nuclear ribonucleoprotein H1 (H)	5q35.3	RBM				|HNRNPH1|3187|P31943|heterogeneous nuclear ribonucleoprotein H [Homo sapiens]	418@C22,418@C34,418@C267,418@C290
NP_001007.2|	623	1	46.9697	774	RPS12	ribosomal protein S12	6q23	RPS	4	6	8	|RPS12|6206|P25398|40S ribosomal protein S12 [Homo sapiens]	418@C50,418@C69,418@C130,418@C92
NP_001012.1|,NP_001185986.1|	667	2	30.3704	832	Unmapped_NP_001185986.1|				4	5	8	|RPS17L|100505503|P0CW22;P08708|40S ribosomal protein S17-like [Homo sapiens]	418@C35
NP_001012.1|			30.3704		RPS17	ribosomal protein S17	15q25.2	RPS				|RPS17|6218|P0CW22;P08708|40S ribosomal protein S17 [Homo sapiens]	418@C35
NP_001185986.1|			30.3704		Unmapped_NP_001185986.1|							|RPS17L|100505503|P0CW22;P08708|40S ribosomal protein S17-like [Homo sapiens]	418@C35
NP_008938.2|	748	1	7.07804	944	CPSF6	cleavage and polyadenylation specific factor 6, 68kDa	12q15	RBM	4	5	8	|CPSF6|11052|Q16630|cleavage and polyadenylation specificity factor subunit 6 [Homo sapiens]	418@C476,418@C159,418@C466
NP_002289.2|	62	1	9.40989	74	LCP1	lymphocyte cytosolic protein 1 (L-plastin)	13q14.3	EFHAND	3	4	8	|LCP1|3936|P13796|plastin-2 [Homo sapiens]	418@C283,418@C42,418@C336
NP_004631.1|,NP_542165.1|	92	2	8.8785	115	DDX39B	DEAD (Asp-Glu-Ala-Asp) box polypeptide 39B	6p21.33	DDX	3	4	8	|DDX39B|7919|Q13838|spliceosome RNA helicase DDX39B [Homo sapiens]	418@C165,418@C239
NP_004631.1|			8.8785		DDX39B	DEAD (Asp-Glu-Ala-Asp) box polypeptide 39B	6p21.33	DDX				|DDX39B|7919|Q13838|spliceosome RNA helicase DDX39B [Homo sapiens]	418@C165,418@C239
NP_542165.1|			8.8785		DDX39B	DEAD (Asp-Glu-Ala-Asp) box polypeptide 39B	6p21.33	DDX				|DDX39B|7919|Q13838|spliceosome RNA helicase DDX39B [Homo sapiens]	418@C165,418@C239
NP_000980.1|	236	1	48.6957	293	RPL30	ribosomal protein L30	8q22	RPL	3	5	8	|RPL30|6156|P62888|60S ribosomal protein L30 [Homo sapiens]	418@C92,418@C85,418@C52
NP_001596.2|	354	1	5.3719	440	AARS	alanyl-tRNA synthetase	16q22.1	aaRS2	3	5	8	|AARS|16|P49588|alanine--tRNA ligase, cytoplasmic [Homo sapiens]	418@C671,418@C773,418@C75
NP_062543.1|,NP_001027565.1|	460	2	15.5902	564	HNRNPH2	heterogeneous nuclear ribonucleoprotein H2 (H')	Xq22	RBM	3	4	8	|HNRNPH2|3188|P55795|heterogeneous nuclear ribonucleoprotein H2 [Homo sapiens]	418@C290,418@C267,418@C34
NP_062543.1|			15.5902		HNRNPH2	heterogeneous nuclear ribonucleoprotein H2 (H')	Xq22	RBM				|HNRNPH2|3188|P55795|heterogeneous nuclear ribonucleoprotein H2 [Homo sapiens]	418@C34,418@C267,418@C290
NP_001027565.1|			15.5902		HNRNPH2	heterogeneous nuclear ribonucleoprotein H2 (H')	Xq22	RBM				|HNRNPH2|3188|P55795|heterogeneous nuclear ribonucleoprotein H2 [Homo sapiens]	418@C34,418@C267,418@C290
NP_036222.3|	465	1	0.441989	569	MACF1	microtubule-actin crosslinking factor 1	1p32-p31	EFHAND	3	4	8	|MACF1|23499|Q9UPN3;Q6ZSD7|microtubule-actin cross-linking factor 1 isoform a [Homo sapiens]	418@C3064,418@C2839,418@C2758
NP_000875.2|	562	1	7.7821	695	IMPDH2	IMP (inosine 5'-monophosphate) dehydrogenase 2	3p21.2		3	4	8	|IMPDH2|3615|P12268|inosine-5'-monophosphate dehydrogenase 2 [Homo sapiens]	418@C331,418@C140
NP_003366.2|,NP_001171752.1|	257	2	18.7075	1082	VDAC2	voltage-dependent anion channel 2	10q22	VDAC	3	3	8	|VDAC2|7417|P45880|voltage-dependent anion-selective channel protein 2 isoform 2 [Homo sapiens]	418@C47,418@C76,418@C13
NP_003366.2|			18.7075		VDAC2	voltage-dependent anion channel 2	10q22	VDAC				|VDAC2|7417|P45880|voltage-dependent anion-selective channel protein 2 isoform 2 [Homo sapiens]	418@C13,418@C47,418@C76
NP_001171752.1|			18.7075		VDAC2	voltage-dependent anion channel 2	10q22	VDAC				|VDAC2|7417|P45880|voltage-dependent anion-selective channel protein 2 isoform 2 [Homo sapiens]	418@C13,418@C47,418@C76
NP_001896.2|	852	1	7.95262	1107	CTPS1	CTP synthase 1	1p34.1		3	4	8	|CTPS1|1503|P17812|CTP synthase 1 [Homo sapiens]	418@C362,418@C491,418@C30
NP_004485.1|	100	1	16.6667	409	HDGF	hepatoma-derived growth factor	1q23.1		2	4	8	|HDGF|3068|P51858|hepatoma-derived growth factor isoform a [Homo sapiens]	418@C108,418@C12
NP_000969.1|	531	1	37.1429	654	RPL23	ribosomal protein L23	17q12	RPL	2	3	8	|RPL23|9349|P62829|60S ribosomal protein L23 [Homo sapiens]	418@C28,418@C125
NP_001138882.1|	308	1	13.6126	971	NONO	non-POU domain containing, octamer-binding	Xq13.1	RBM	2	3	8	|NONO|4841|Q15233;B7Z4C2;F5GYZ3|non-POU domain-containing octamer-binding protein isoform 2 [Homo sapiens]	418@C56,418@C119
NP_031389.3|,NP_001138880.1|,NP_001138881.1|	308	3	13.1635	1100	NONO	non-POU domain containing, octamer-binding	Xq13.1	RBM	2	3	8	|NONO|4841|Q15233|non-POU domain-containing octamer-binding protein isoform 1 [Homo sapiens]	418@C145,418@C208
NP_031389.3|			13.1635		NONO	non-POU domain containing, octamer-binding	Xq13.1	RBM				|NONO|4841|Q15233|non-POU domain-containing octamer-binding protein isoform 1 [Homo sapiens]	418@C145,418@C208
NP_001138880.1|			13.1635		NONO	non-POU domain containing, octamer-binding	Xq13.1	RBM				|NONO|4841|Q15233|non-POU domain-containing octamer-binding protein isoform 1 [Homo sapiens]	418@C145,418@C208
NP_001138881.1|			13.1635		NONO	non-POU domain containing, octamer-binding	Xq13.1	RBM				|NONO|4841|Q15233|non-POU domain-containing octamer-binding protein isoform 1 [Homo sapiens]	418@C145,418@C208
NP_065393.1|,NP_997403.1|,NP_997404.1|,NP_722550.1|,NP_008939.1|	348	5	3.39087	432	RTN4	reticulon 4	2p14-p13		1	2	8	|RTN4|57142|Q9NQC3;Q7L7Q5|reticulon-4 isoform C [Homo sapiens]	418@C1101,418@C301,418@C895,418@C282,418@C108
NP_065393.1|			1.1745		RTN4	reticulon 4	2p14-p13					|RTN4|57142|Q9NQC3;Q8IUA4|reticulon-4 isoform A [Homo sapiens]	418@C1101
NP_997403.1|			3.57143		RTN4	reticulon 4	2p14-p13					|RTN4|57142|Q9NQC3;Q8IUA4|reticulon-4 isoform D [Homo sapiens]	418@C301
NP_997404.1|			1.41988		RTN4	reticulon 4	2p14-p13					|RTN4|57142|Q9NQC3;Q8IUA4|reticulon-4 isoform E [Homo sapiens]	418@C895
NP_722550.1|			3.75335		RTN4	reticulon 4	2p14-p13					|RTN4|57142|Q9NQC3;Q7L7Q6;Q8IUA4|reticulon-4 isoform B [Homo sapiens]	418@C282
NP_008939.1|			7.03518		RTN4	reticulon 4	2p14-p13					|RTN4|57142|Q9NQC3;Q7L7Q5|reticulon-4 isoform C [Homo sapiens]	418@C108
NP_001157733.1|,NP_001157734.1|,NP_839944.1|,NP_001137355.1|,NP_001129261.1|,NP_001137504.1|,XP_003846538.1|,XP_003846552.1|,XP_003846565.1|	467	9	8.42892	571	Unmapped_XP_003846565.1|				1	2	8	|LOC100996754|100996754|-|PREDICTED: peptidyl-prolyl cis-trans isomerase A-like 4G-like [Homo sapiens]	418@C62,418@C83
NP_001157733.1|			8.53659		PPIAL4D	peptidylprolyl isomerase A (cyclophilin A)-like 4D	1q21					|PPIAL4D|645142|F5H284|peptidylprolyl isomerase A (cyclophilin A)-like 4D [Homo sapiens]	418@C62
NP_001157734.1|			8.53659		Unmapped_NP_001157734.1|							|PPIAL4F|728945|F5H284|peptidylprolyl isomerase A (cyclophilin A)-like 4F [Homo sapiens]	418@C62
NP_839944.1|			8.53659		Unmapped_NP_839944.1|							|PPIAL4A|164022|Q9Y536|peptidylprolyl cis-trans isomerase A-like 4B [Homo sapiens]	418@C62
NP_001137355.1|			8.53659		PPIAL4B	peptidylprolyl isomerase A (cyclophilin A)-like 4B	1q21.1					|PPIAL4B|653505|Q9Y536|peptidyl-prolyl cis-trans isomerase A-like 4A/B/C [Homo sapiens]	418@C62
NP_001129261.1|			8.53659		Unmapped_NP_001129261.1|							|PPIAL4C|653598|Q9Y536|peptidyl-prolyl cis-trans isomerase A-like 4A/B/C [Homo sapiens]	418@C62
NP_001137504.1|			8.53659		Unmapped_NP_001137504.1|							|PPIAL4E|730262|F5H284|peptidylprolyl isomerase A (cyclophilin A)-like 4E [Homo sapiens]	418@C62
XP_003846538.1|			7.56757		Unmapped_XP_003846538.1|							|LOC100996725|100996725|-|PREDICTED: peptidyl-prolyl cis-trans isomerase A-like 4A/B/C-like [Homo sapiens]	418@C83
XP_003846552.1|			8.53659		Unmapped_XP_003846552.1|							|LOC100996744|100996744|-|PREDICTED: peptidyl-prolyl cis-trans isomerase A-like 4G-like [Homo sapiens]	418@C62
XP_003846565.1|			8.53659		Unmapped_XP_003846565.1|							|LOC100996754|100996754|-|PREDICTED: peptidyl-prolyl cis-trans isomerase A-like 4G-like [Homo sapiens]	418@C62
XP_001718975.3|,XP_372741.4|	467	2	13.1797	875	Unmapped_XP_372741.4|				1	2	8	|LOC390956|390956|-|PREDICTED: peptidyl-prolyl cis-trans isomerase A-like [Homo sapiens]	418@C108,418@C84
XP_001718975.3|			12.381		Unmapped_XP_001718975.3|							|LOC390956|390956|-|PREDICTED: peptidyl-prolyl cis-trans isomerase A-like [Homo sapiens]	418@C108
XP_372741.4|			13.9785		Unmapped_XP_372741.4|							|LOC390956|390956|-|PREDICTED: peptidyl-prolyl cis-trans isomerase A-like [Homo sapiens]	418@C84
NP_066953.1|	467	1	43.6364	933	PPIA	peptidylprolyl isomerase A (cyclophilin A)	7p13		1	2	8	|PPIA|5478|P62937;A8K220|peptidyl-prolyl cis-trans isomerase A [Homo sapiens]	418@C62
NP_006004.2|	81	1	28.972	98	RPL10	ribosomal protein L10	Xq28	RPL	4	4	7	|RPL10|6134|P27635|60S ribosomal protein L10 isoform a [Homo sapiens]	418@C49,418@C195,418@C105
NP_005959.2|,NP_112480.2|	102	2	19.5784	125	HNRNPM	heterogeneous nuclear ribonucleoprotein M	19p13.2	RBM	4	4	7	|HNRNPM|4670|P52272|heterogeneous nuclear ribonucleoprotein M isoform b [Homo sapiens]	418@C676,418@C637,418@C653,418@C614,418@C114
NP_005959.2|			19.0411		HNRNPM	heterogeneous nuclear ribonucleoprotein M	19p13.2	RBM				|HNRNPM|4670|P52272|heterogeneous nuclear ribonucleoprotein M isoform a [Homo sapiens]	418@C114,418@C653,418@C676
NP_112480.2|			20.1158		HNRNPM	heterogeneous nuclear ribonucleoprotein M	19p13.2	RBM				|HNRNPM|4670|P52272|heterogeneous nuclear ribonucleoprotein M isoform b [Homo sapiens]	418@C114,418@C614,418@C637
NP_004095.4|	352	1	5.97372	437	FASN	fatty acid synthase	17q25	SDRA	4	5	7	|FASN|2194|P49327|fatty acid synthase [Homo sapiens]	418@C1471,418@C1141,418@C1881,418@C1459
NP_065801.1|	624	1	3.90365	775	XPO5	exportin 5	6p21.1	XPO	4	5	7	|XPO5|57510|Q9HAV4|exportin-5 [Homo sapiens]	418@C1157,418@C1052,418@C1131,418@C44
NP_055427.2|	671	1	6.17174	840	FAM120A	family with sequence similarity 120A	9q22.31		4	4	7	|FAM120A|23196|Q9NZB2|constitutive coactivator of PPAR-gamma-like protein 1 [Homo sapiens]	418@C919,418@C531,418@C1103,418@C279
NP_003900.1|	811	1	7.26257	1043	CPNE3	copine III	8q21		4	5	7	|CPNE3|8895|O75131;Q05DL8|copine-3 [Homo sapiens]	418@C15,418@C54,418@C385
NP_006420.1|,NP_001159757.1|	2	2	13.4597	2	CCT7	chaperonin containing TCP1, subunit 7 (eta)	2p13.2	CHAP	3	4	7	|CCT7|10574|Q99832|T-complex protein 1 subunit eta isoform d [Homo sapiens]	418@C158,418@C114,418@C370,418@C326,418@C364,418@C320
NP_006420.1|			12.8913		CCT7	chaperonin containing TCP1, subunit 7 (eta)	2p13.2	CHAP				|CCT7|10574|Q99832|T-complex protein 1 subunit eta isoform a [Homo sapiens]	418@C158,418@C364,418@C370
NP_001159757.1|			14.0281		CCT7	chaperonin containing TCP1, subunit 7 (eta)	2p13.2	CHAP				|CCT7|10574|Q99832|T-complex protein 1 subunit eta isoform d [Homo sapiens]	418@C114,418@C320,418@C326
NP_009103.2|,NP_705931.1|	40	2	7.49611	47	NUP50	nucleoporin 50kDa	22q13.3		3	4	7	|NUP50|10762|Q9UKX7|nuclear pore complex protein Nup50 isoform a [Homo sapiens]	418@C181,418@C153,418@C165,418@C137,418@C151,418@C123
NP_009103.2|			7.26496		NUP50	nucleoporin 50kDa	22q13.3					|NUP50|10762|Q9UKX7|nuclear pore complex protein Nup50 isoform b [Homo sapiens]	418@C151,418@C165,418@C181
NP_705931.1|			7.72727		NUP50	nucleoporin 50kDa	22q13.3					|NUP50|10762|Q9UKX7|nuclear pore complex protein Nup50 isoform a [Homo sapiens]	418@C123,418@C137,418@C153
NP_620305.1|	146	1	1.4427	187	Unmapped_NP_620305.1|				3	4	7	|SON|6651|P18583|protein SON isoform F [Homo sapiens]	418@C2109,418@C2070,418@C2380
NP_055040.2|	161	1	11.7148	203	PPP2R1A	protein phosphatase 2, regulatory subunit A, alpha	19q13	PPP2R	3	4	7	|PPP2R1A|5518|P30153;A8K7B7|serine/threonine-protein phosphatase 2A 65 kDa regulatory subunit A alpha isoform [Homo sapiens]	418@C294,418@C329,418@C390
NP_003741.1|	204	1	4.55861	258	EIF3A	eukaryotic translation initiation factor 3, subunit A	10q26.11		3	4	7	|EIF3A|8661|Q14152|eukaryotic translation initiation factor 3 subunit A [Homo sapiens]	418@C78,418@C478,418@C198
NP_003671.1|	216	1	7.00758	272	YARS	tyrosyl-tRNA synthetase	1p35.1	aaRS1	3	4	7	|YARS|8565|P54577|tyrosine--tRNA ligase, cytoplasmic [Homo sapiens]	418@C424,418@C250,418@C519
NP_056255.2|,NP_001229696.1|,NP_001229697.1|	187	3	4.39493	295	MTHFD1L	methylenetetrahydrofolate dehydrogenase (NADP+ dependent) 1-like	6q25.1		3	4	7	|MTHFD1L|25902|Q6UB35;B2RD24|monofunctional C1-tetrahydrofolate synthase, mitochondrial isoform 3 [Homo sapiens]	418@C828,418@C829,418@C763,418@C906,418@C907,418@C841,418@C198,418@C132
NP_056255.2|			4.29448		MTHFD1L	methylenetetrahydrofolate dehydrogenase (NADP+ dependent) 1-like	6q25.1					|MTHFD1L|25902|Q6UB35|monofunctional C1-tetrahydrofolate synthase, mitochondrial isoform 2 precursor [Homo sapiens]	418@C198,418@C828,418@C906
NP_001229696.1|			4.29009		MTHFD1L	methylenetetrahydrofolate dehydrogenase (NADP+ dependent) 1-like	6q25.1					|MTHFD1L|25902|Q6UB35;B7ZM99|monofunctional C1-tetrahydrofolate synthase, mitochondrial isoform 1 precursor [Homo sapiens]	418@C198,418@C829,418@C907
NP_001229697.1|			4.60022		MTHFD1L	methylenetetrahydrofolate dehydrogenase (NADP+ dependent) 1-like	6q25.1					|MTHFD1L|25902|Q6UB35;B2RD24|monofunctional C1-tetrahydrofolate synthase, mitochondrial isoform 3 [Homo sapiens]	418@C132,418@C763,418@C841
NP_001095.1|,NP_001245300.1|	296	2	3.90456	361	Unmapped_NP_001245300.1|				3	4	7	|ACTN3|89|B4DZQ2|alpha-actinin-3 isoform 2 [Homo sapiens]	418@C277,418@C320,418@C346,418@C389,418@C168,418@C211
NP_001095.1|			3.99556		Unmapped_NP_001095.1|							|ACTN3|89|Q08043;Q4VAM3|alpha-actinin-3 isoform 1 [Homo sapiens]	418@C168,418@C277,418@C346
NP_001245300.1|			3.81356		Unmapped_NP_001245300.1|							|ACTN3|89|B4DZQ2|alpha-actinin-3 isoform 2 [Homo sapiens]	418@C211,418@C320,418@C389
NP_001159756.1|	2	1	13.1579	385	CCT7	chaperonin containing TCP1, subunit 7 (eta)	2p13.2	CHAP	3	4	7	|CCT7|10574|Q99832|T-complex protein 1 subunit eta isoform c [Homo sapiens]	418@C71,418@C283,418@C277
NP_004374.1|,NP_001120662.1|	342	2	7.11111	426	CSK	c-src tyrosine kinase	15q24.1	SH2D	3	4	7	|CSK|1445|P41240;A8K3B6;B2R6Q4|tyrosine-protein kinase CSK [Homo sapiens]	418@C290,418@C31,418@C223
NP_004374.1|			7.11111		CSK	c-src tyrosine kinase	15q24.1	SH2D				|CSK|1445|P41240;B2R6Q4|tyrosine-protein kinase CSK [Homo sapiens]	418@C31,418@C223,418@C290
NP_001120662.1|			7.11111		CSK	c-src tyrosine kinase	15q24.1	SH2D				|CSK|1445|P41240;A8K3B6;B2R6Q4|tyrosine-protein kinase CSK [Homo sapiens]	418@C31,418@C223,418@C290
NP_001243142.1|,NP_689509.1|,NP_001243143.1|	405	3	2.64455	498	ATP1A3	ATPase, Na+/K+ transporting, alpha 3 polypeptide	19q13.2	PATP	3	4	7	|ATP1A3|478|P13637;B7Z2T0;Q53ES0|sodium/potassium-transporting ATPase subunit alpha-3 isoform 3 [Homo sapiens]	418@C607,418@C596,418@C609,418@C706,418@C695,418@C708,418@C429,418@C418,418@C431
NP_001243142.1|			2.63672		ATP1A3	ATPase, Na+/K+ transporting, alpha 3 polypeptide	19q13.2	PATP				|ATP1A3|478|P13637;B7Z2T0;B7Z401;F5H6J6;Q53ES0|sodium/potassium-transporting ATPase subunit alpha-3 isoform 2 [Homo sapiens]	418@C429,418@C607,418@C706
NP_689509.1|			2.66535		ATP1A3	ATPase, Na+/K+ transporting, alpha 3 polypeptide	19q13.2	PATP				|ATP1A3|478|P13637;B7Z2T0;Q53ES0|sodium/potassium-transporting ATPase subunit alpha-3 isoform 1 [Homo sapiens]	418@C418,418@C596,418@C695
NP_001243143.1|			2.63158		ATP1A3	ATPase, Na+/K+ transporting, alpha 3 polypeptide	19q13.2	PATP				|ATP1A3|478|P13637;B7Z2T0;Q53ES0|sodium/potassium-transporting ATPase subunit alpha-3 isoform 3 [Homo sapiens]	418@C431,418@C609,418@C708
NP_065389.2|	588	1	15.3639	726	PCBP3	poly(rC) binding protein 3	21q22.3		3	4	7	|PCBP3|54039|P57721|poly(rC)-binding protein 3 isoform 1 [Homo sapiens]	418@C141,418@C195,418@C86
NP_005007.2|,NP_001122383.1|,NP_001122385.1|	588	3	20.2969	727	PCBP2	poly(rC) binding protein 2	12q13.13		3	4	7	|PCBP2|5094|Q15366|poly(rC)-binding protein 2 isoform f [Homo sapiens]	418@C109,418@C158,418@C54
NP_005007.2|			19.6721		PCBP2	poly(rC) binding protein 2	12q13.13					|PCBP2|5094|Q15366|poly(rC)-binding protein 2 isoform a [Homo sapiens]	418@C54,418@C109,418@C158
NP_001122383.1|			19.726		PCBP2	poly(rC) binding protein 2	12q13.13					|PCBP2|5094|Q15366|poly(rC)-binding protein 2 isoform d [Homo sapiens]	418@C54,418@C109,418@C158
NP_001122385.1|			21.4925		PCBP2	poly(rC) binding protein 2	12q13.13					|PCBP2|5094|Q15366|poly(rC)-binding protein 2 isoform f [Homo sapiens]	418@C54,418@C109,418@C158
NP_001244955.1|	101	1	81.4371	741	TPI1	triosephosphate isomerase 1	12p13.31		3	3	7	|TPI1|7167|B7Z5D8|triosephosphate isomerase isoform 3 [Homo sapiens]	418@C45,418@C136,418@C5
NP_036602.1|	8	1	4.00867	746	TNPO3	transportin 3	7q32.2	IPO	3	4	7	|TNPO3|23534|Q9Y5L0;B3KMX1|transportin-3 isoform 1 [Homo sapiens]	418@C634,418@C793,418@C511
NP_005156.1|	713	1	14.011	898	ALDOC	aldolase C, fructose-bisphosphate	17q11.2		3	5	7	|ALDOC|230|P09972|fructose-bisphosphate aldolase C [Homo sapiens]	418@C178,418@C202
NP_001003.1|	745	1	25	940	RPS8	ribosomal protein S8	1p34.1-p32	RPS	3	4	7	|RPS8|6202|P62241;Q5JR94|40S ribosomal protein S8 [Homo sapiens]	418@C100,418@C174,418@C182
NP_078938.2|,NP_001137502.1|	760	2	4.55609	961	NAT10	N-acetyltransferase 10 (GCN5-related)	11p13		3	4	7	|NAT10|55226|Q9H0A0;B4DFD5|N-acetyltransferase 10 isoform b [Homo sapiens]	418@C746,418@C674,418@C105,418@C33,418@C517,418@C445
NP_078938.2|			4.39024		NAT10	N-acetyltransferase 10 (GCN5-related)	11p13					|NAT10|55226|Q9H0A0|N-acetyltransferase 10 isoform a [Homo sapiens]	418@C105,418@C517,418@C746
NP_001137502.1|			4.72193		NAT10	N-acetyltransferase 10 (GCN5-related)	11p13					|NAT10|55226|Q9H0A0;B4DFD5|N-acetyltransferase 10 isoform b [Homo sapiens]	418@C33,418@C445,418@C674
NP_001193929.1|,NP_112740.1|	813	2	11.5555	1048	HNRNPDL	heterogeneous nuclear ribonucleoprotein D-like	4q21.22	RBM	3	5	7	|HNRPDL|9987|O14979|heterogeneous nuclear ribonucleoprotein D-like isoform a [Homo sapiens]	418@C303,418@C177,418@C277
NP_001193929.1|			12.3967		HNRNPDL	heterogeneous nuclear ribonucleoprotein D-like	4q21.22	RBM				|HNRPDL|9987|O14979|heterogeneous nuclear ribonucleoprotein D-like isoform b [Homo sapiens]	418@C177,418@C277,418@C303
NP_112740.1|			10.7143		HNRNPDL	heterogeneous nuclear ribonucleoprotein D-like	4q21.22	RBM				|HNRPDL|9987|O14979|heterogeneous nuclear ribonucleoprotein D-like isoform a [Homo sapiens]	418@C177,418@C277,418@C303
NP_006351.2|	151	1	5.08021	193	EIF3M	eukaryotic translation initiation factor 3, subunit M	11p13		2	4	7	|EIF3M|10480|Q7L2H7|eukaryotic translation initiation factor 3 subunit M [Homo sapiens]	418@C175,418@C207
NP_009191.1|	153	1	11.2554	195	LYPLA2	lysophospholipase II	1p36.11		2	3	7	|LYPLA2|11313|O95372|acyl-protein thioesterase 2 [Homo sapiens]	418@C213,418@C56
NP_001012321.1|,NP_002286.2|	186	2	18.6441	230	RPSA	ribosomal protein SA	3p21.3		2	3	7	|RPSA|3921|P08865|40S ribosomal protein SA [Homo sapiens]	418@C148,418@C163
NP_001012321.1|			18.6441		RPSA	ribosomal protein SA	3p21.3					|RPSA|3921|P08865|40S ribosomal protein SA [Homo sapiens]	418@C148,418@C163
NP_002286.2|			18.6441		RPSA	ribosomal protein SA	3p21.3					|RPSA|3921|P08865|40S ribosomal protein SA [Homo sapiens]	418@C148,418@C163
NP_004598.1|	201	1	8.33333	254	TBCA	tubulin folding cofactor A	5q14.1		2	3	7	|TBCA|6902|O75347;Q6FGD7|tubulin-specific chaperone A [Homo sapiens]	418@C67
NP_002473.2|,NP_001182122.1|	572	2	4.50543	706	NASP	nuclear autoantigenic sperm protein (histone-binding)	1p34.1	TTC	2	3	7	|NASP|4678|P49321;B4DQP3;F5H3J2|nuclear autoantigenic sperm protein isoform 4 [Homo sapiens]	418@C708,418@C644,418@C254,418@C190
NP_002473.2|			4.31472		NASP	nuclear autoantigenic sperm protein (histone-binding)	1p34.1	TTC				|NASP|4678|P49321|nuclear autoantigenic sperm protein isoform 2 [Homo sapiens]	418@C254,418@C708
NP_001182122.1|			4.69613		NASP	nuclear autoantigenic sperm protein (histone-binding)	1p34.1	TTC				|NASP|4678|P49321;B4DQP3;F5H3J2|nuclear autoantigenic sperm protein isoform 4 [Homo sapiens]	418@C190,418@C644
NP_001247435.1|,NP_000996.2|,NP_001243731.1|	174	3	50.3811	834	RPS3	ribosomal protein S3	11q13.3-q13.5	RPS	2	3	7	|RPS3|6188|P23396|40S ribosomal protein S3 isoform 1 [Homo sapiens]	418@C113,418@C97,418@C150,418@C134
NP_001247435.1|			48.2625		RPS3	ribosomal protein S3	11q13.3-q13.5	RPS				|RPS3|6188|-|40S ribosomal protein S3 isoform 2 [Homo sapiens]	418@C113,418@C150
NP_000996.2|			51.4403		RPS3	ribosomal protein S3	11q13.3-q13.5	RPS				|RPS3|6188|P23396|40S ribosomal protein S3 isoform 1 [Homo sapiens]	418@C97,418@C134
NP_001243731.1|			51.4403		RPS3	ribosomal protein S3	11q13.3-q13.5	RPS				|RPS3|6188|P23396|40S ribosomal protein S3 isoform 1 [Homo sapiens]	418@C97,418@C134
NP_060598.3|	310	1	2.73632	380	TSR1	TSR1, 20S rRNA accumulation, homolog (S. cerevisiae)	17p13.3		1	2	7	|TSR1|55720|Q2NL82|pre-rRNA-processing protein TSR1 homolog [Homo sapiens]	418@C126
NP_055720.3|,NP_001243239.1|	548	2	2.05856	678	GLS	glutaminase	2q32-q34	ANKRD	1	2	7	|GLS|2744|O94925;Q68D38|glutaminase kidney isoform, mitochondrial isoform 2 [Homo sapiens]	418@C283,418@C287
NP_055720.3|			1.9432		GLS	glutaminase	2q32-q34	ANKRD				|GLS|2744|O94925|glutaminase kidney isoform, mitochondrial isoform 1 [Homo sapiens]	418@C283,418@C287
NP_001243239.1|			2.17391		GLS	glutaminase	2q32-q34	ANKRD				|GLS|2744|O94925;Q68D38|glutaminase kidney isoform, mitochondrial isoform 2 [Homo sapiens]	418@C283,418@C287
NP_067050.1|,NP_001254746.1|,NP_001254747.1|	729	3	9.84302	920	OSTC	oligosaccharyltransferase complex subunit (non-catalytic)	4q25		1	2	7	|OSTC|58505|-|oligosaccharyltransferase complex subunit OSTC isoform 3 [Homo sapiens]	418@C14
NP_067050.1|			8.05369		OSTC	oligosaccharyltransferase complex subunit (non-catalytic)	4q25					|OSTC|58505|Q9NRP0|oligosaccharyltransferase complex subunit OSTC isoform 1 [Homo sapiens]	418@C14
NP_001254746.1|			14.4578		OSTC	oligosaccharyltransferase complex subunit (non-catalytic)	4q25					|OSTC|58505|-|oligosaccharyltransferase complex subunit OSTC isoform 2 [Homo sapiens]	418@C14
NP_001254747.1|			7.01754		OSTC	oligosaccharyltransferase complex subunit (non-catalytic)	4q25					|OSTC|58505|-|oligosaccharyltransferase complex subunit OSTC isoform 3 [Homo sapiens]	418@C14
NP_006421.2|	140	1	10.7607	179	CCT4	chaperonin containing TCP1, subunit 4 (delta)	2p15	CHAP	4	4	6	|CCT4|10575|P50991|T-complex protein 1 subunit delta isoform a [Homo sapiens]	418@C252,418@C379,418@C410,418@C295
NP_001243650.1|	140	1	9.43026	630	CCT4	chaperonin containing TCP1, subunit 4 (delta)	2p15	CHAP	4	4	6	|CCT4|10575|B7Z8B1;F5H5W3|T-complex protein 1 subunit delta isoform b [Homo sapiens]	418@C222,418@C349,418@C380,418@C265
NP_002262.3|	587	1	5.20179	723	IPO5	importin 5	13q32.2	IPO	4	4	6	|IPO5|3843|O00410;B3KWG6;Q9BVS9|importin-5 [Homo sapiens]	418@C198,418@C705,418@C366,418@C751
[truncated: 1,544 more rows]
